# Supplementary material for: Iterative computational design and crystallographic screening identifies potent inhibitors targeting the Nsp3 macrodomain of SARS-CoV-2
Source: PubMed Central journal article supplement (PMC9926234; doi:10.1073/pnas.2212931120), 2023-01-04

**Dataset S6:** Design of neutral probe set. Two carboxylic acids were included as close analogs. Crystal structures of Mac1 in complex with neutral probe set hits. PanDDA event maps are shown for ligands (contoured at  $2\sigma$ ). Protein-ligand hydrogen bonds are shown with dashed black lines. Hydrogen bonds between ligands and the Lys11 backbone nitrogen of a symmetry mate are highlighted with purple spheres/dashes.

D.1

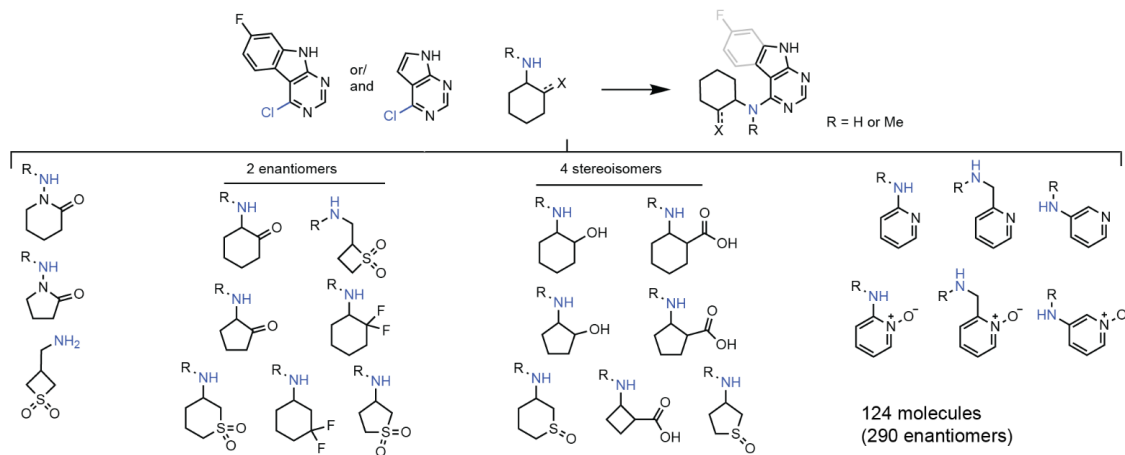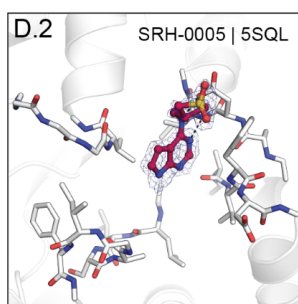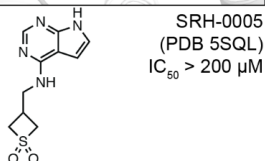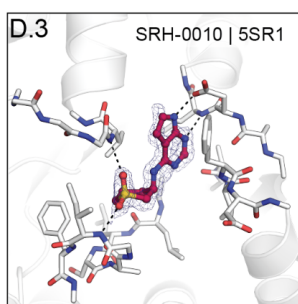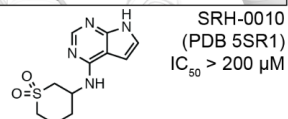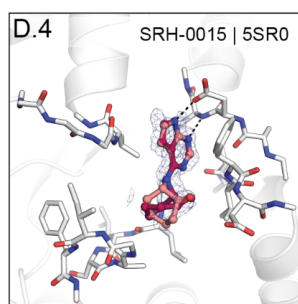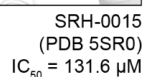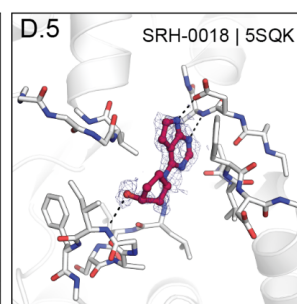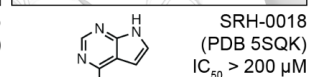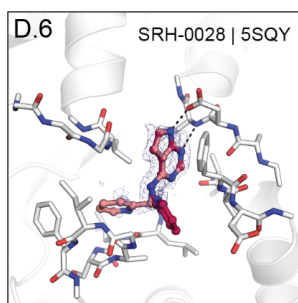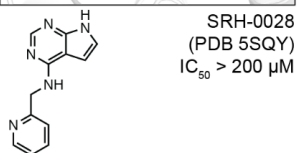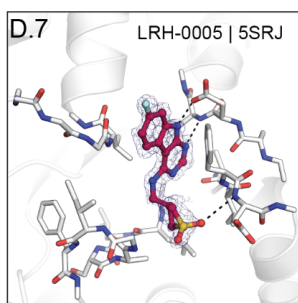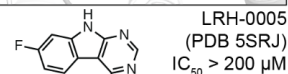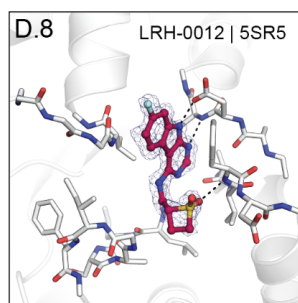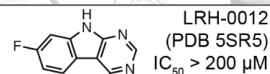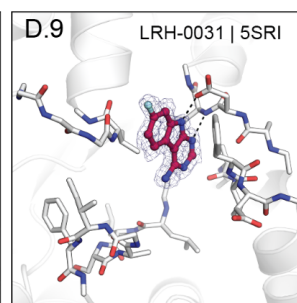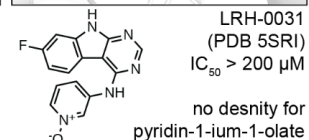

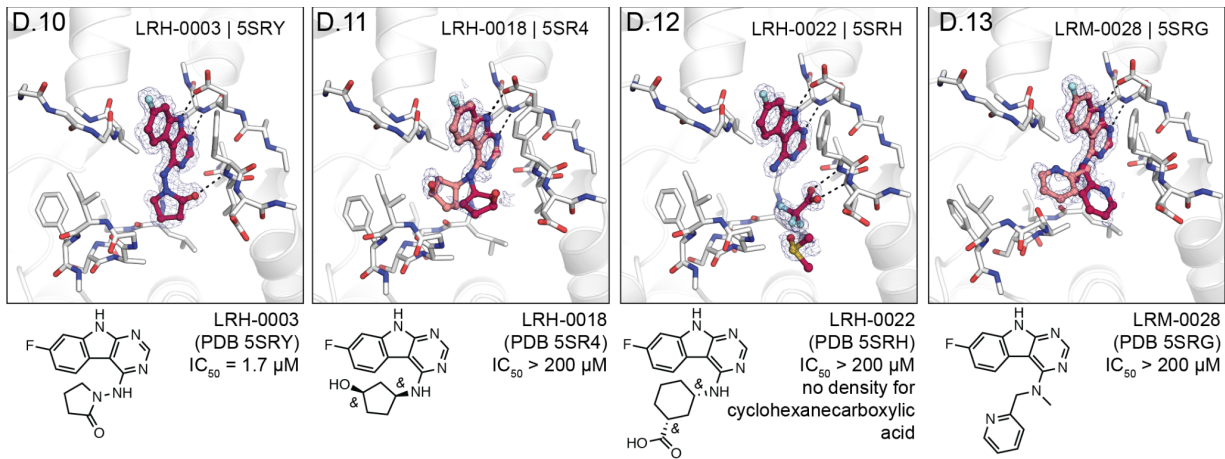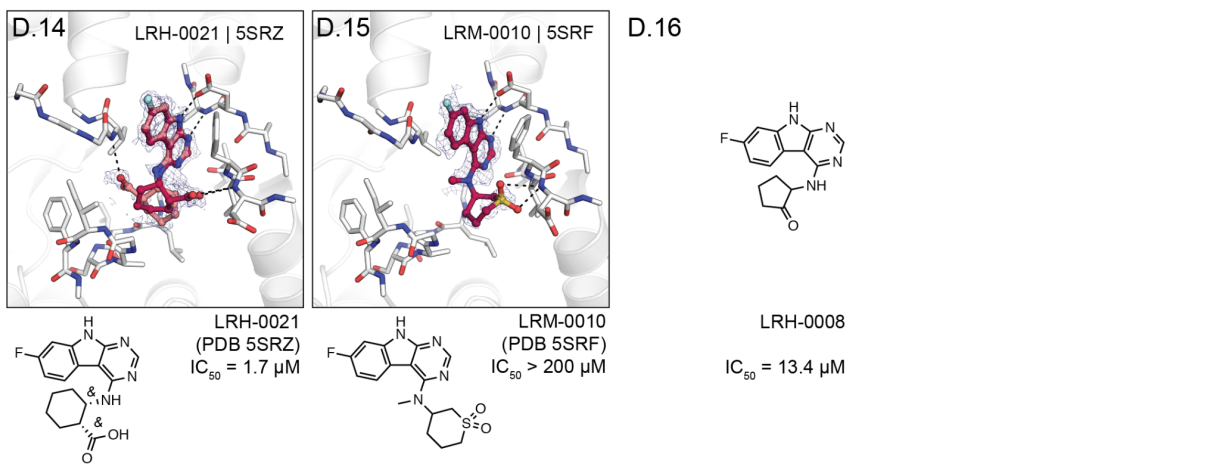

Supplement: pnas.2212931120.sd06.pdf [file pnas.2212931120.sd06.pdf]
