# Supplementary material for: Iterative computational design and crystallographic screening identifies potent inhibitors targeting the Nsp3 macrodomain of SARS-CoV-2
Source: PubMed Central journal article supplement (PMC9926234; doi:10.1073/pnas.2212931120), 2023-01-04

| Figure      | # tested | # active | # inactive | % active | actives                                                                                                                                                                                                          | inactives                                                                                                                                                                                                                                                                                                                                      |
|-------------|----------|----------|------------|----------|------------------------------------------------------------------------------------------------------------------------------------------------------------------------------------------------------------------|------------------------------------------------------------------------------------------------------------------------------------------------------------------------------------------------------------------------------------------------------------------------------------------------------------------------------------------------|
| 2           | 13       | 7        | 6          | 53.8     | Z9604, Z8515, Z8531, Z8539, Z8572, Z8580, Z8585                                                                                                                                                                  | Z3628, Z8554, Z8569, Z8593, Z8598, Z8614                                                                                                                                                                                                                                                                                                       |
| 3           | 18       | 8        | 10         | 44.44    | Z8539_0029, Z8539_0027, Z8539_0030, Z8539_0046, Z8539_0041, Z8539_0014, Z8539_0002, Z8539_0023                                                                                                                   | Z8539_0026, Z8539_0025, Z8539_0037, Z8539_0038, Z8539_0039, Z8539_0009, Z8539_0076, Z8539_0007, Z8539_0011, Z8539_0006                                                                                                                                                                                                                         |
| 5, all      | 123      | 38       | 85         | 30.9     | See by-screen below                                                                                                                                                                                              |                                                                                                                                                                                                                                                                                                                                                |
| 5, screen 1 | 78       | 30       | 48         | 38.4     | Z9020, Z1628, Z1635, Z3291, Z4141, Z5722, Z5356, Z2051, Z0856, Z9550, Z4305, Z4911, Z1027, Z9920, Z5531, Z1015, Z3896, Z8074, Z8186, Z3271, Z5972, Z0893, Z0078, Z4066, Z9652, Z5086, Z4620, Z3789, Z7873, Z1121 | Z8637, Z6511, Z8648, Z5167, Z6395, Z2024, Z4135, Z0329, Z4508, Z9710, Z1086, Z5547, Z2380, Z5505, Z8885, Z7864, Z7665, Z3280, Z7041, Z7570, Z6891, Z8680, Z6019, Z7655, Z7766, Z3167, Z5728, Z8387, Z2995, Z9310, Z1211, Z3700, Z5262, Z0132, Z0953, Z4827, Z6028, Z0288, Z1347, Z6468, Z5289, Z7156, Z1186, Z0828, Z6923, Z7450, Z9572, Z6511 |
| 5, screen 2 | 45       | 8        | 37         | 17.8     | F2804, Z8207, Z3432, F6831, R7335, Z9274, F4769, R1104                                                                                                                                                           | Z1964, R6134, F9046, F7028, Z4196, F0346, Z8835, Z8619, F8284, Z3247, F9192, R3575, R8538, R5324, Z1747, Z8095, F4848, Z4464, R4764, R2032, Z9614, Z1110, Z9028, R8908, R2488, Z4273, Z0063, Z7098, R4401, Z1527, Z6402, Z2483, Z6960, R8539, R8407, Z6512, R0658. (Not tested: Z1314)                                                         |
| 7           | 9        | 5        | 4          | 55.56    | LL1_0023, LL1_0025, LL1_0018, LL1_0014, LL1_0027                                                                                                                                                                 | LL1_0016, LL1_0010, LL1_0005, LL1_0017                                                                                                                                                                                                                                                                                                         |

Actives are defined as any compound for which both of the following conditions were met: (1)  $\Delta T_{ma}$  and compound concentration were positively correlated by Spearman, with a p-value less than or equal to 0.05, and thermal shift and (2) the maximum  $\Delta T_{ma}$  was equal to or exceeded 0.5 °C.

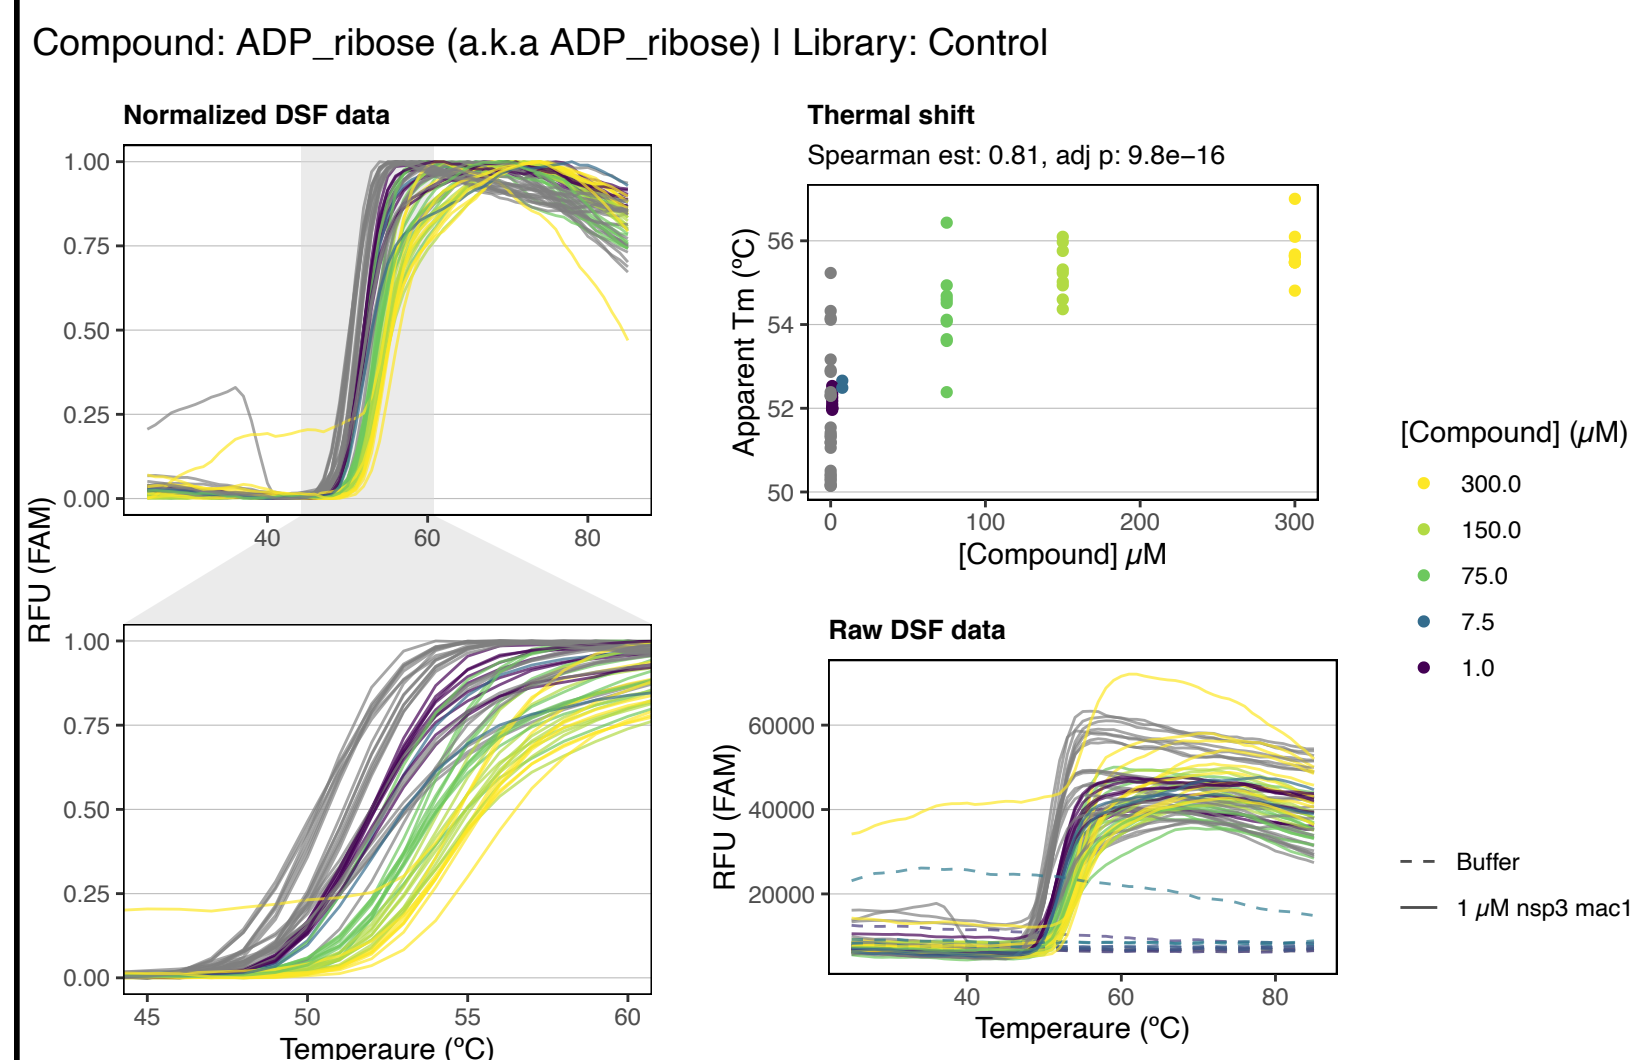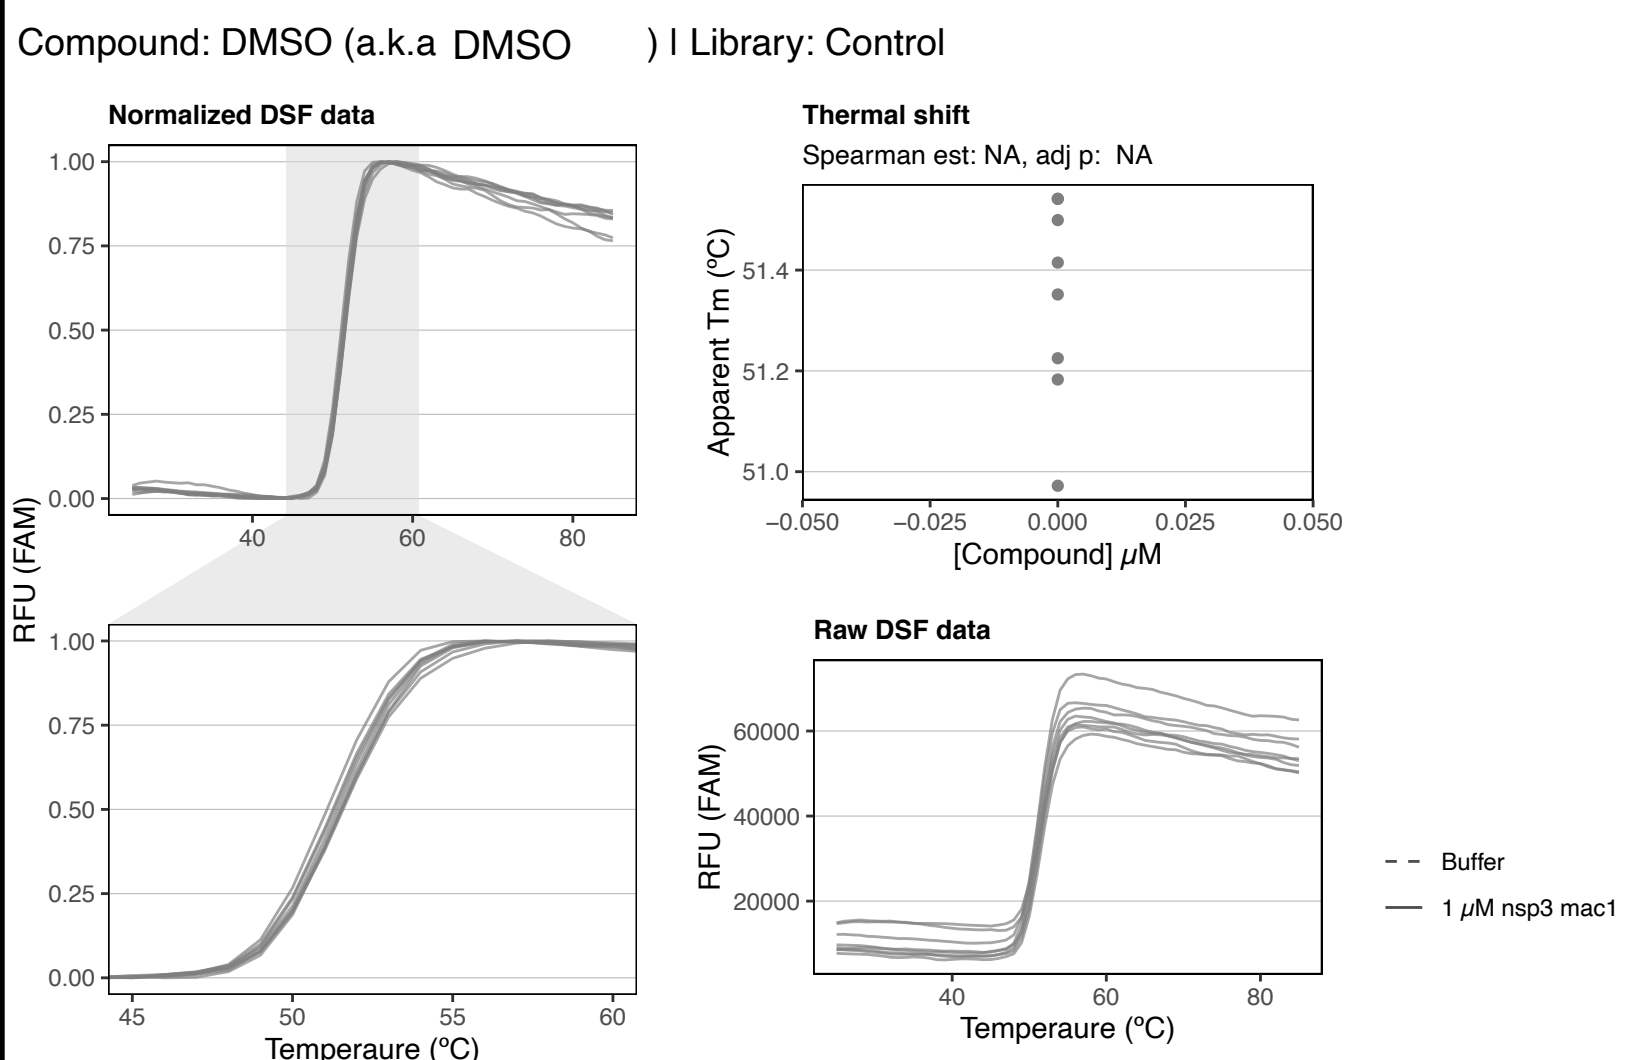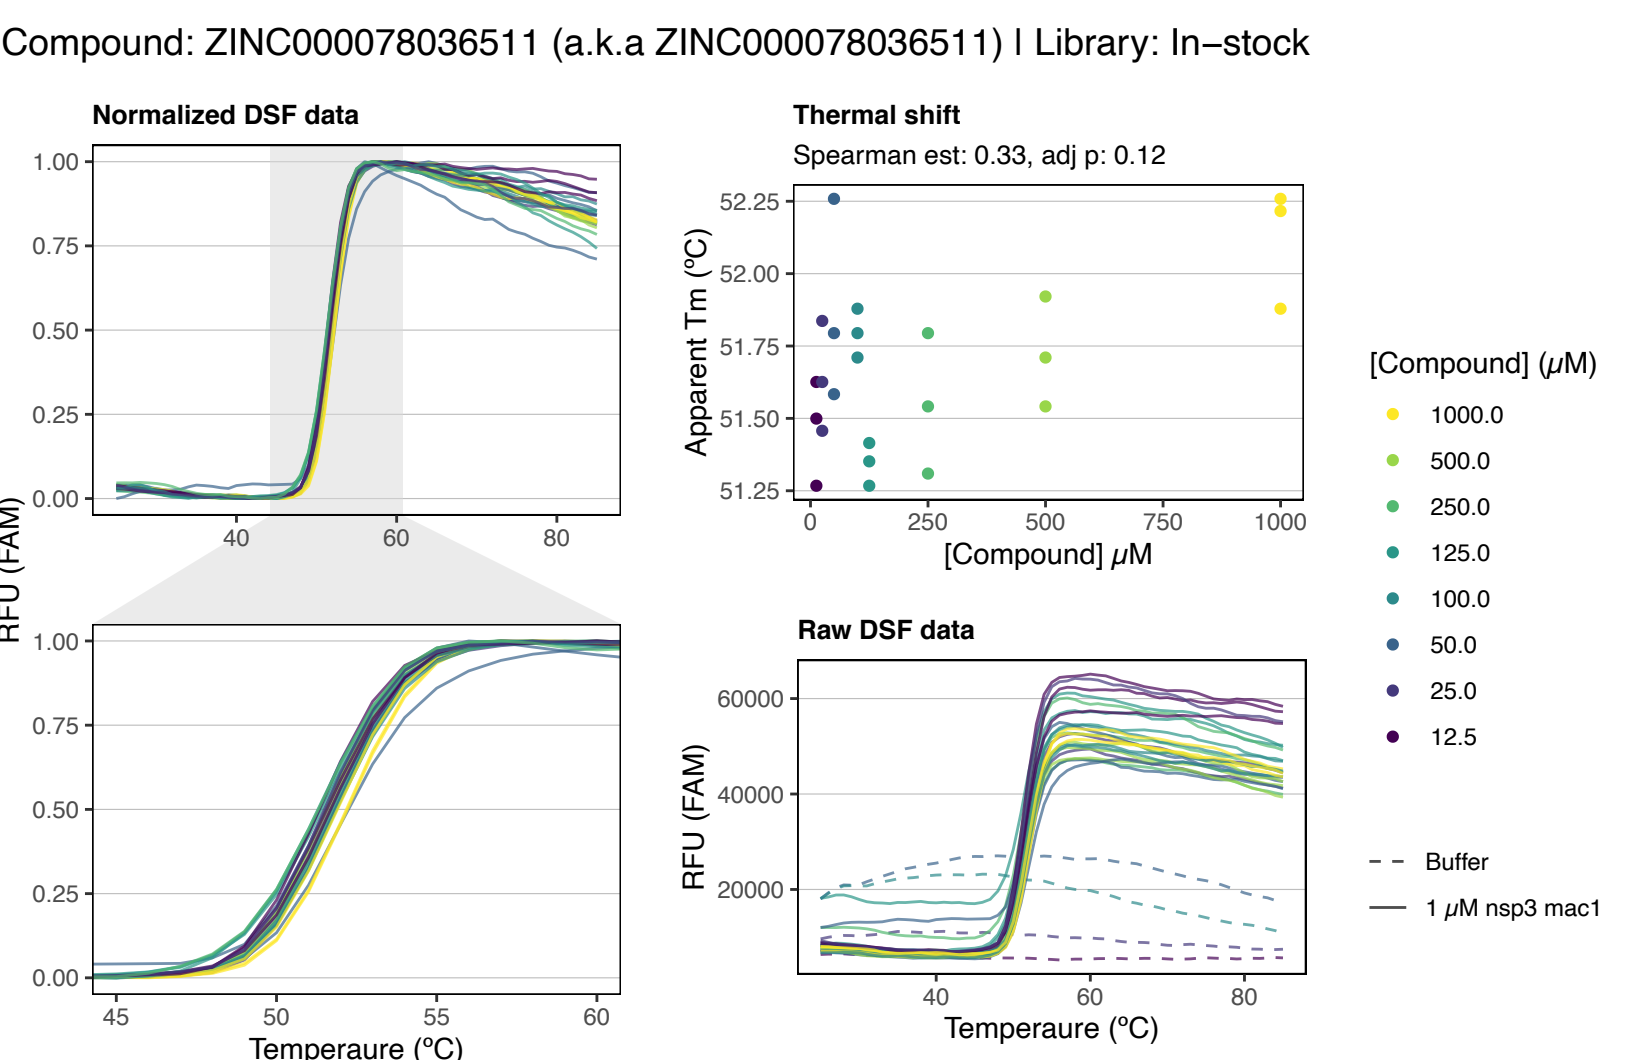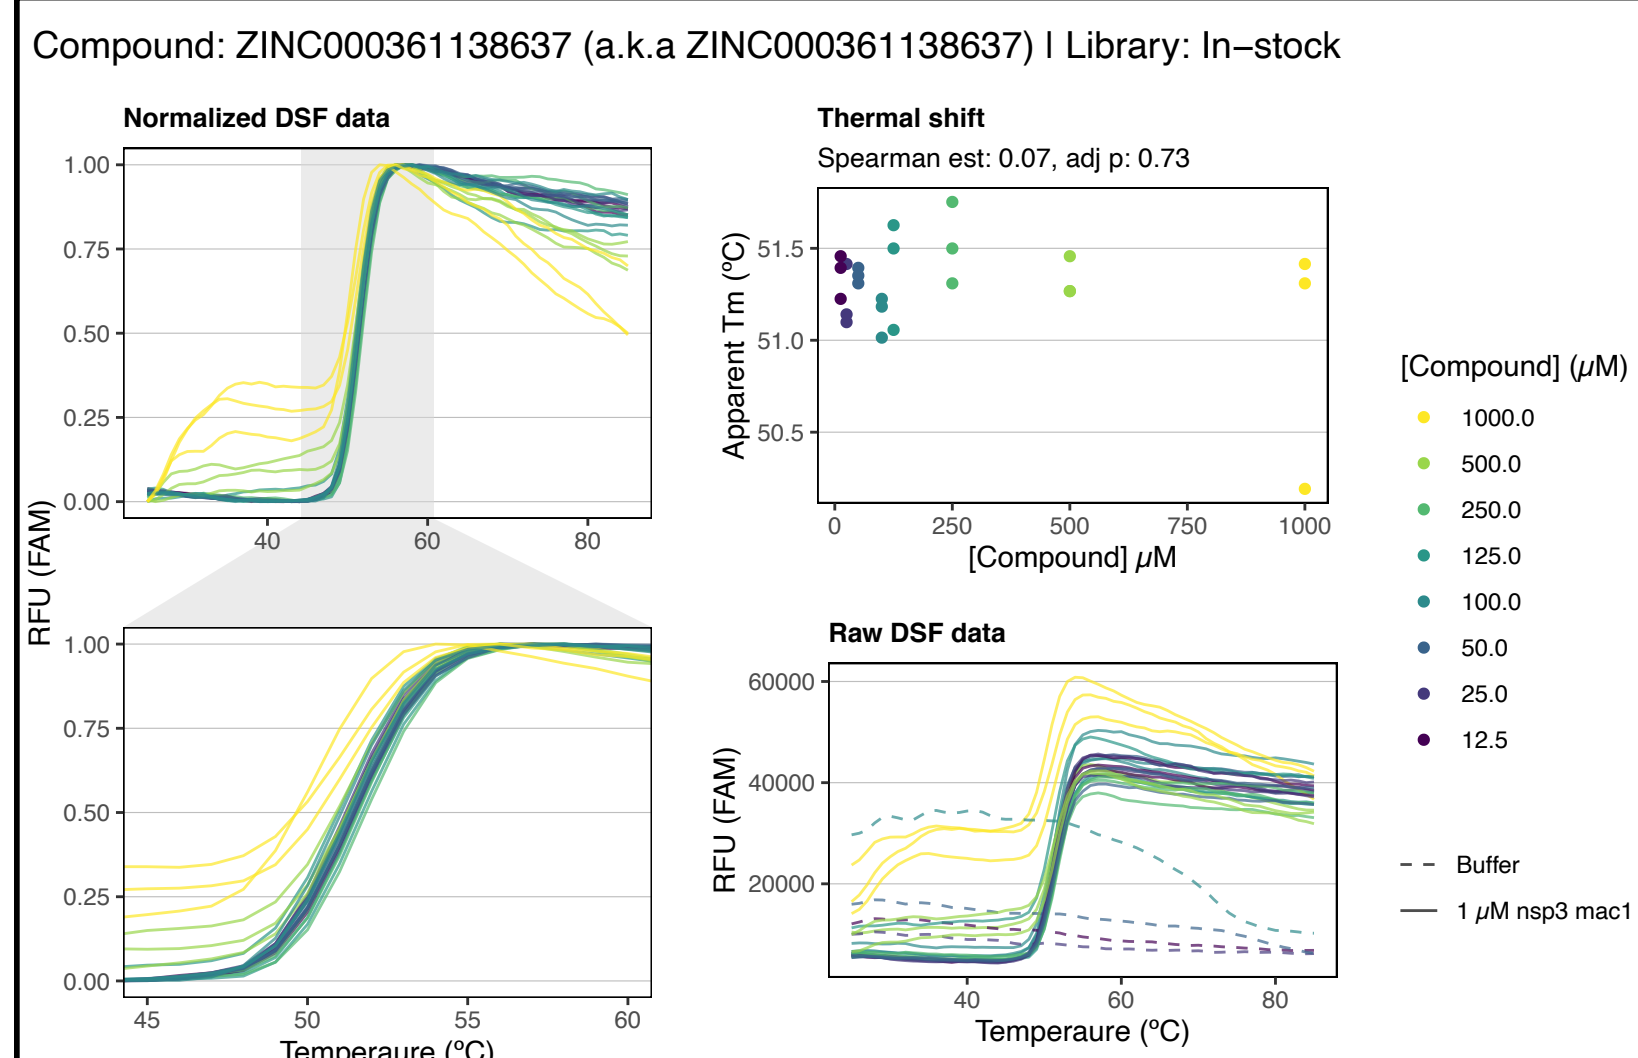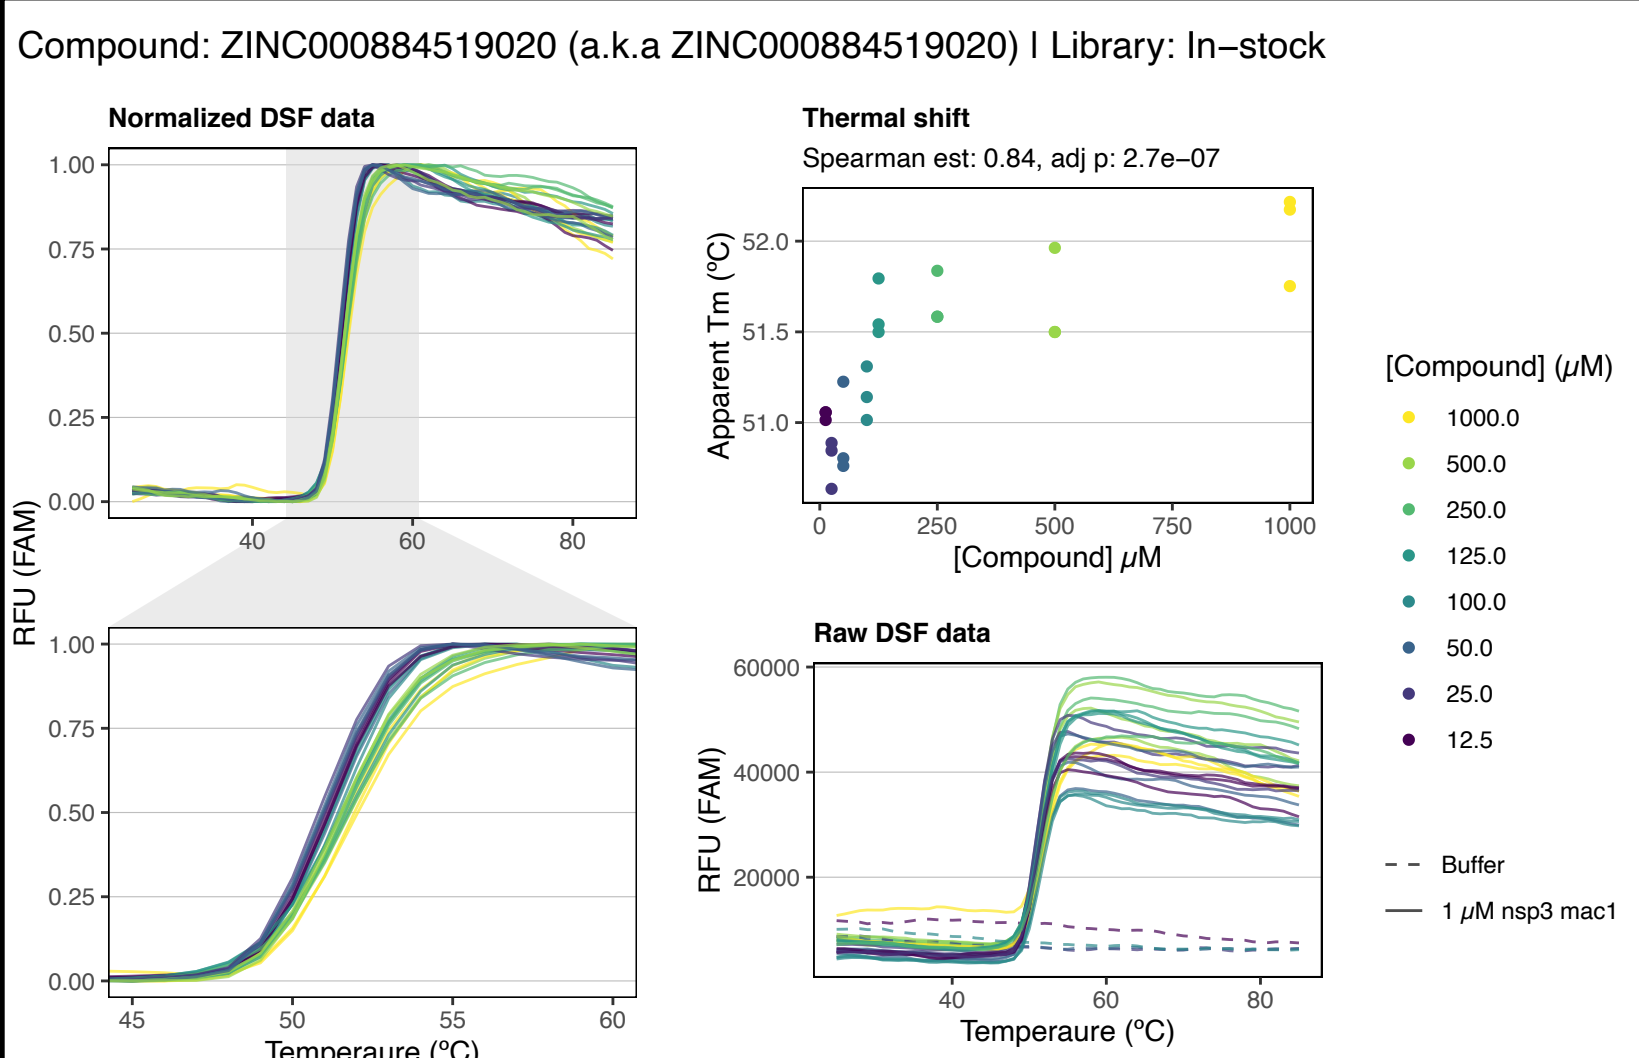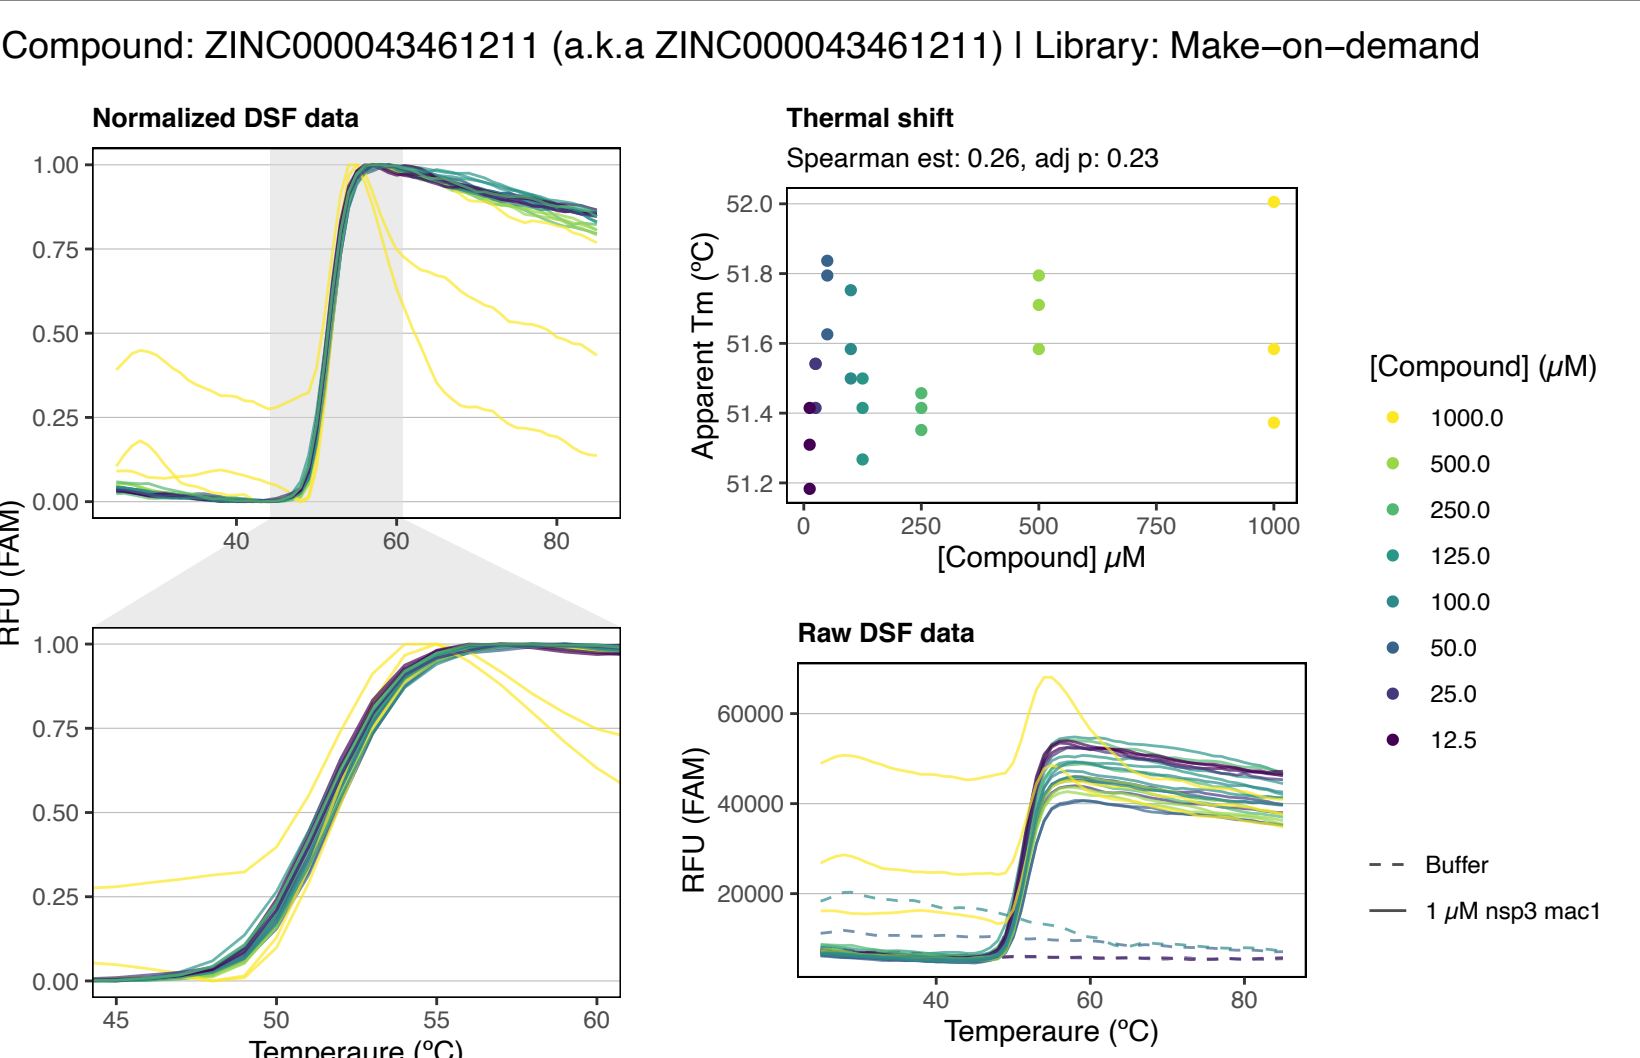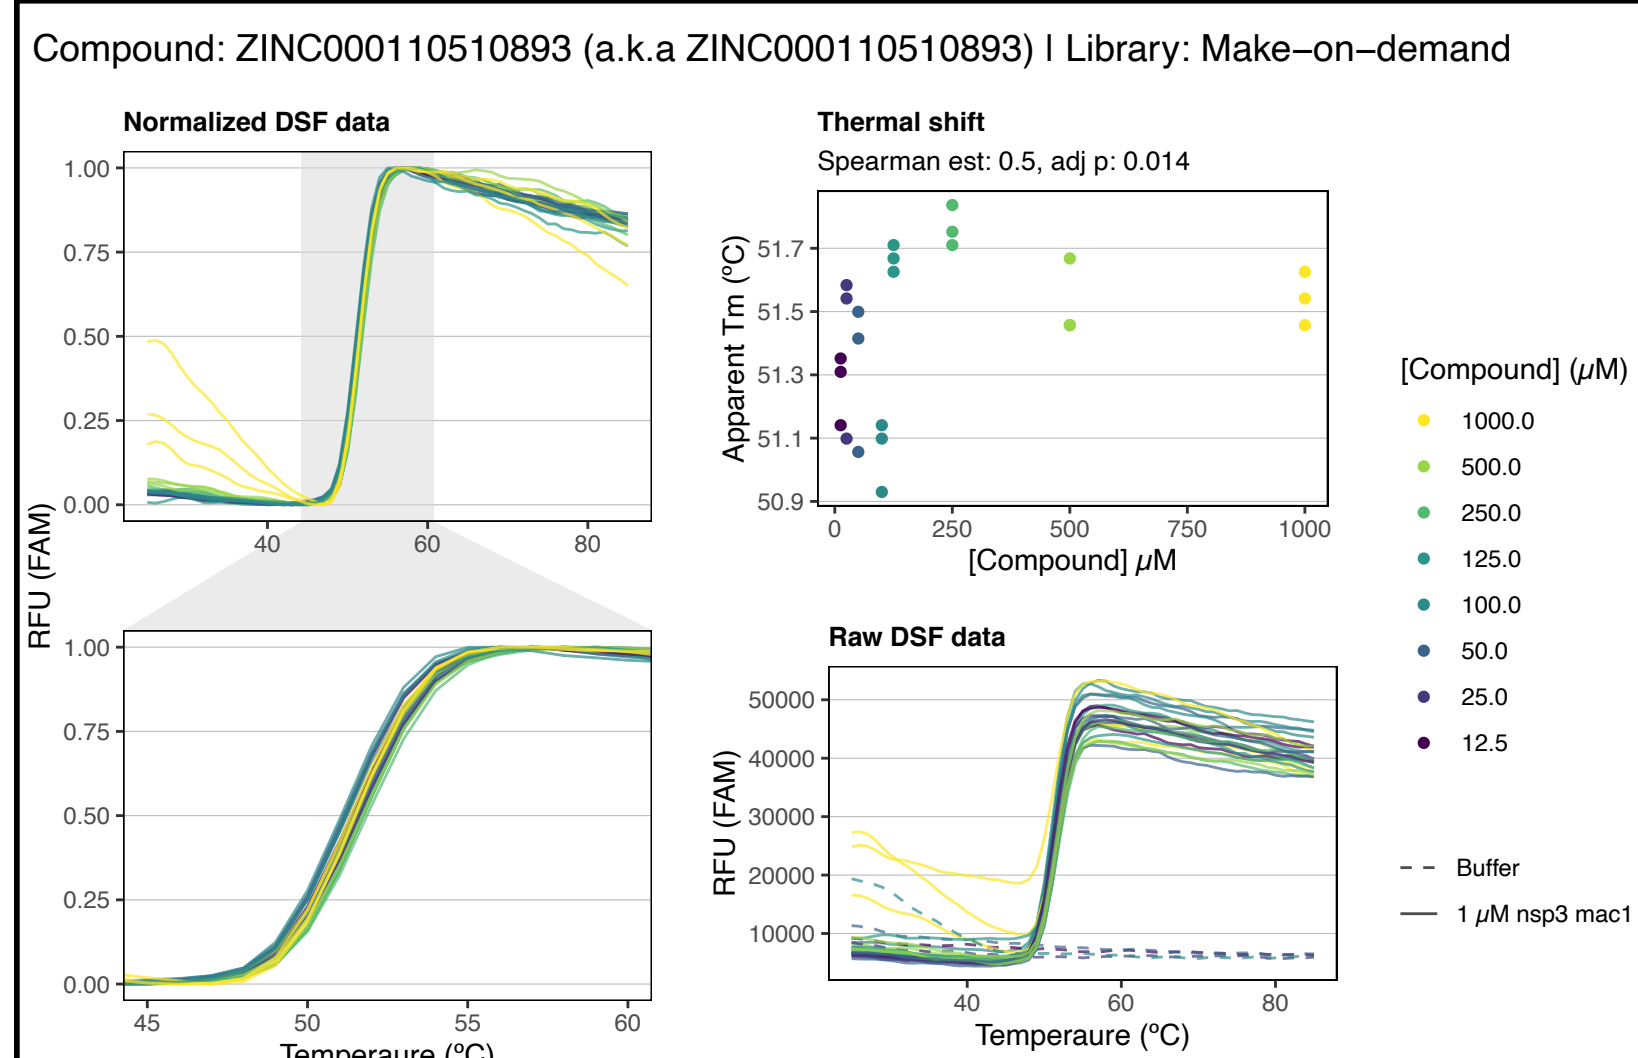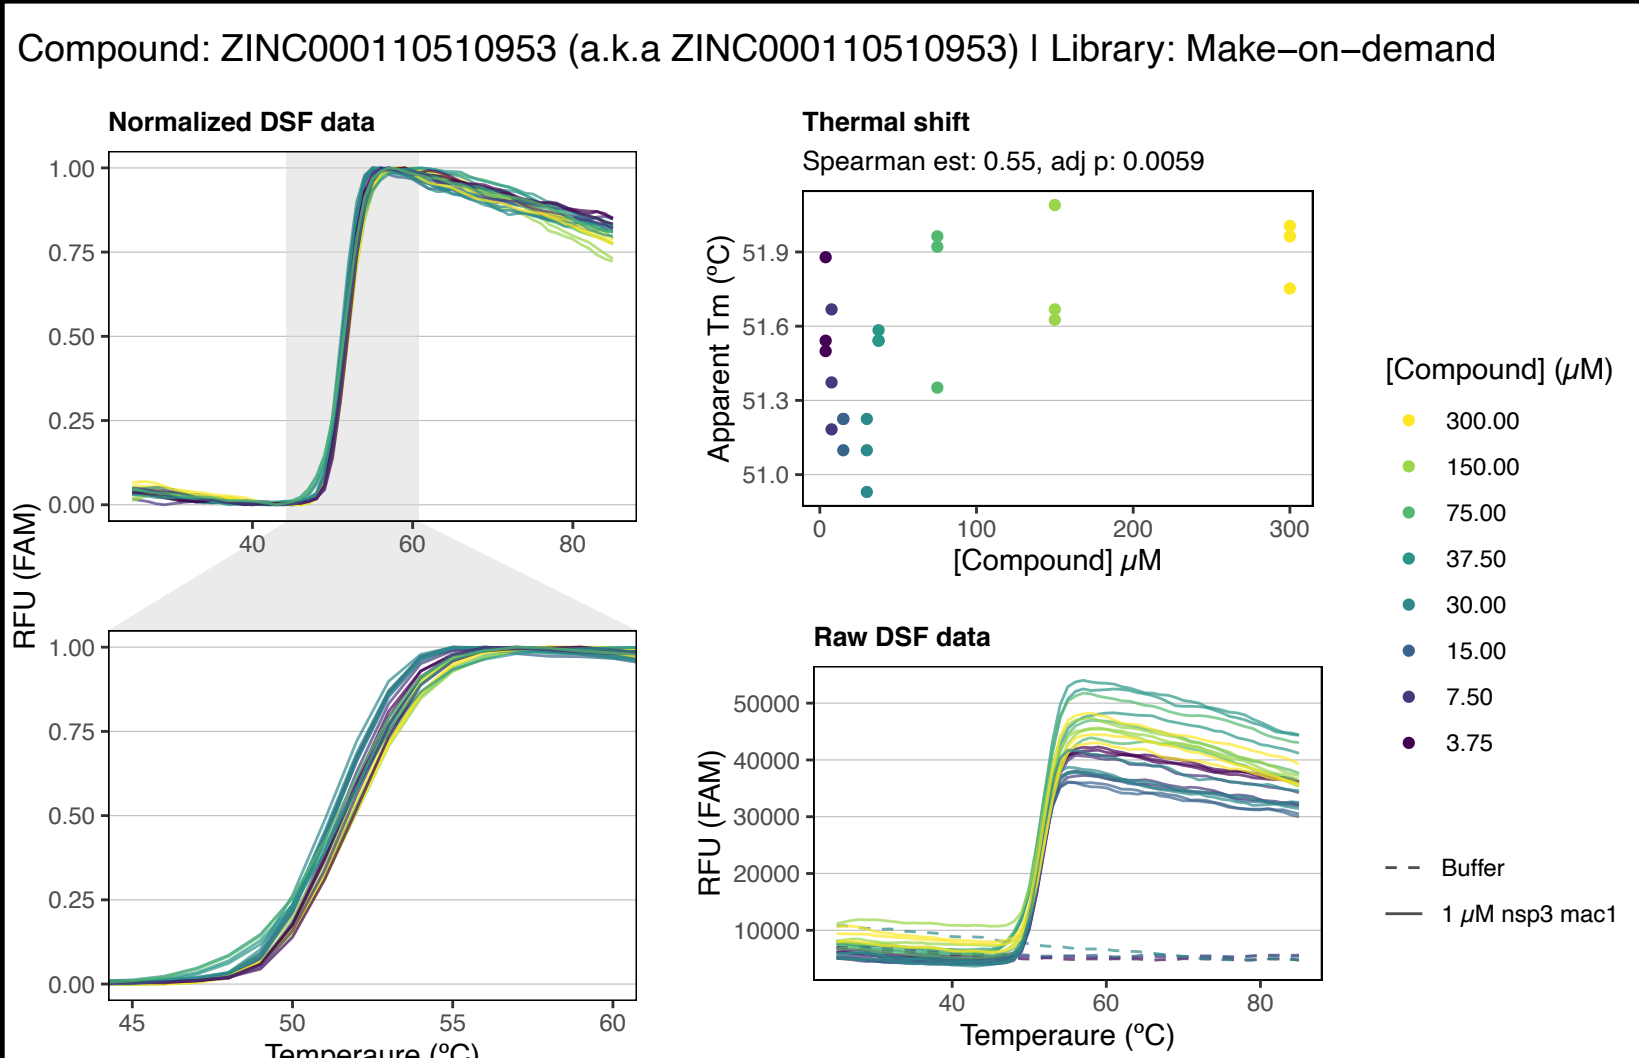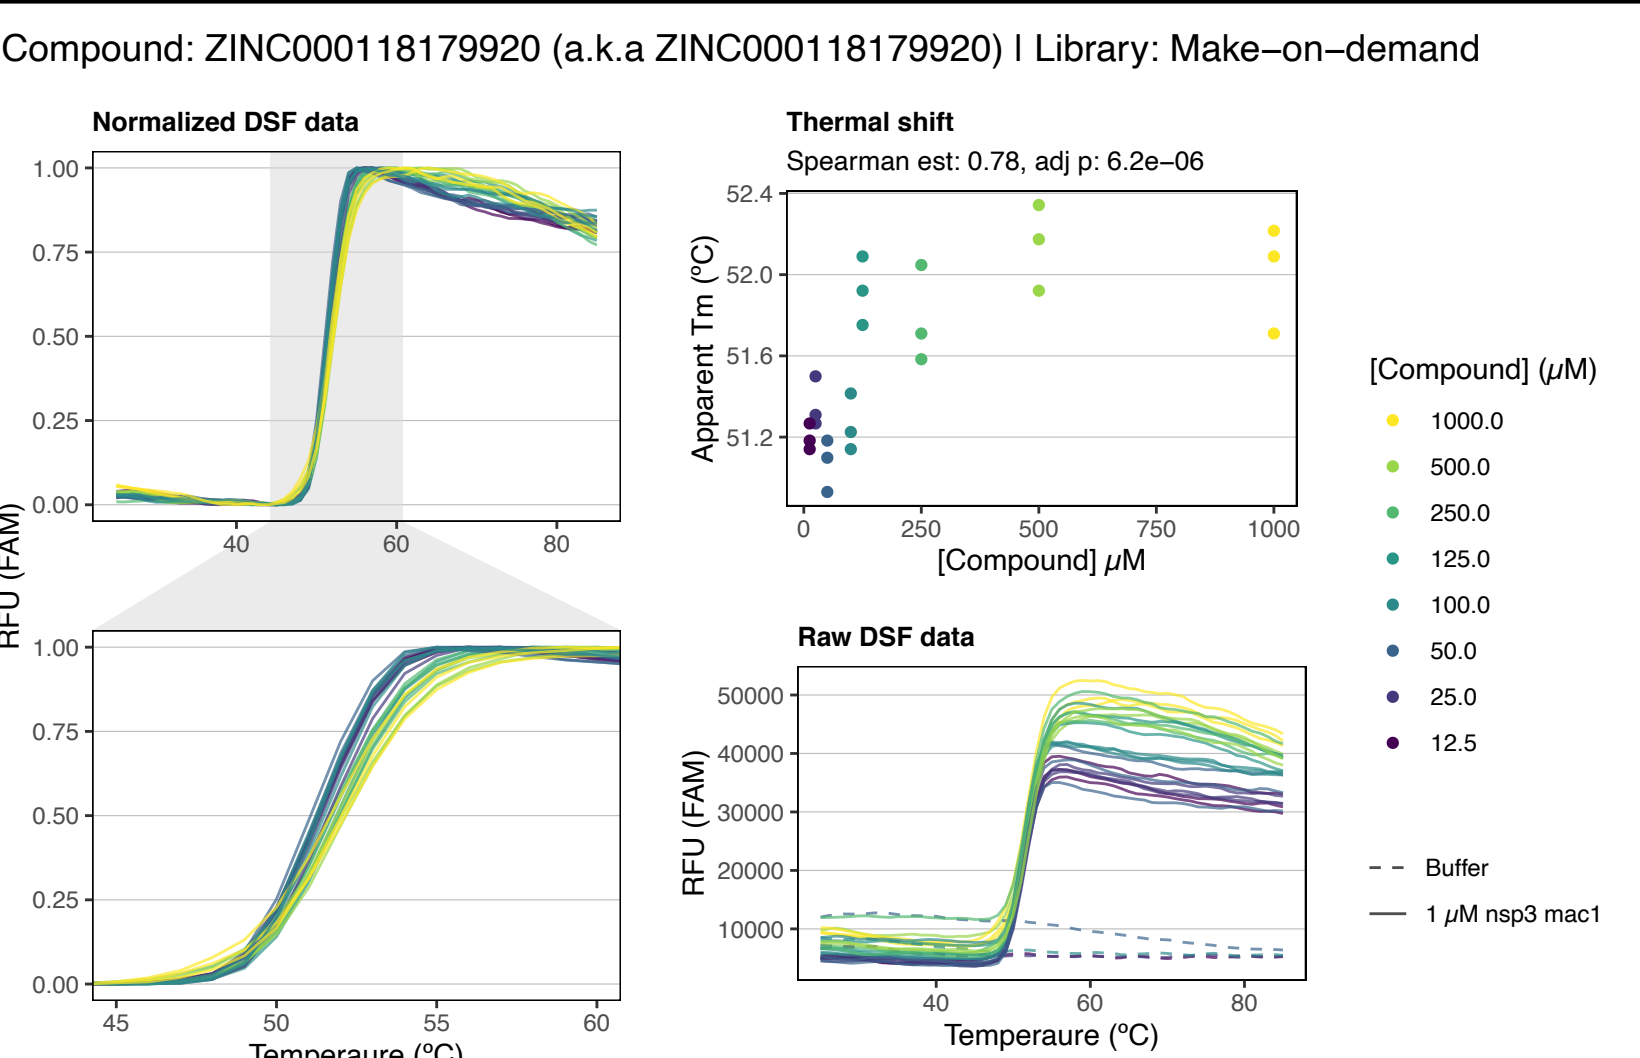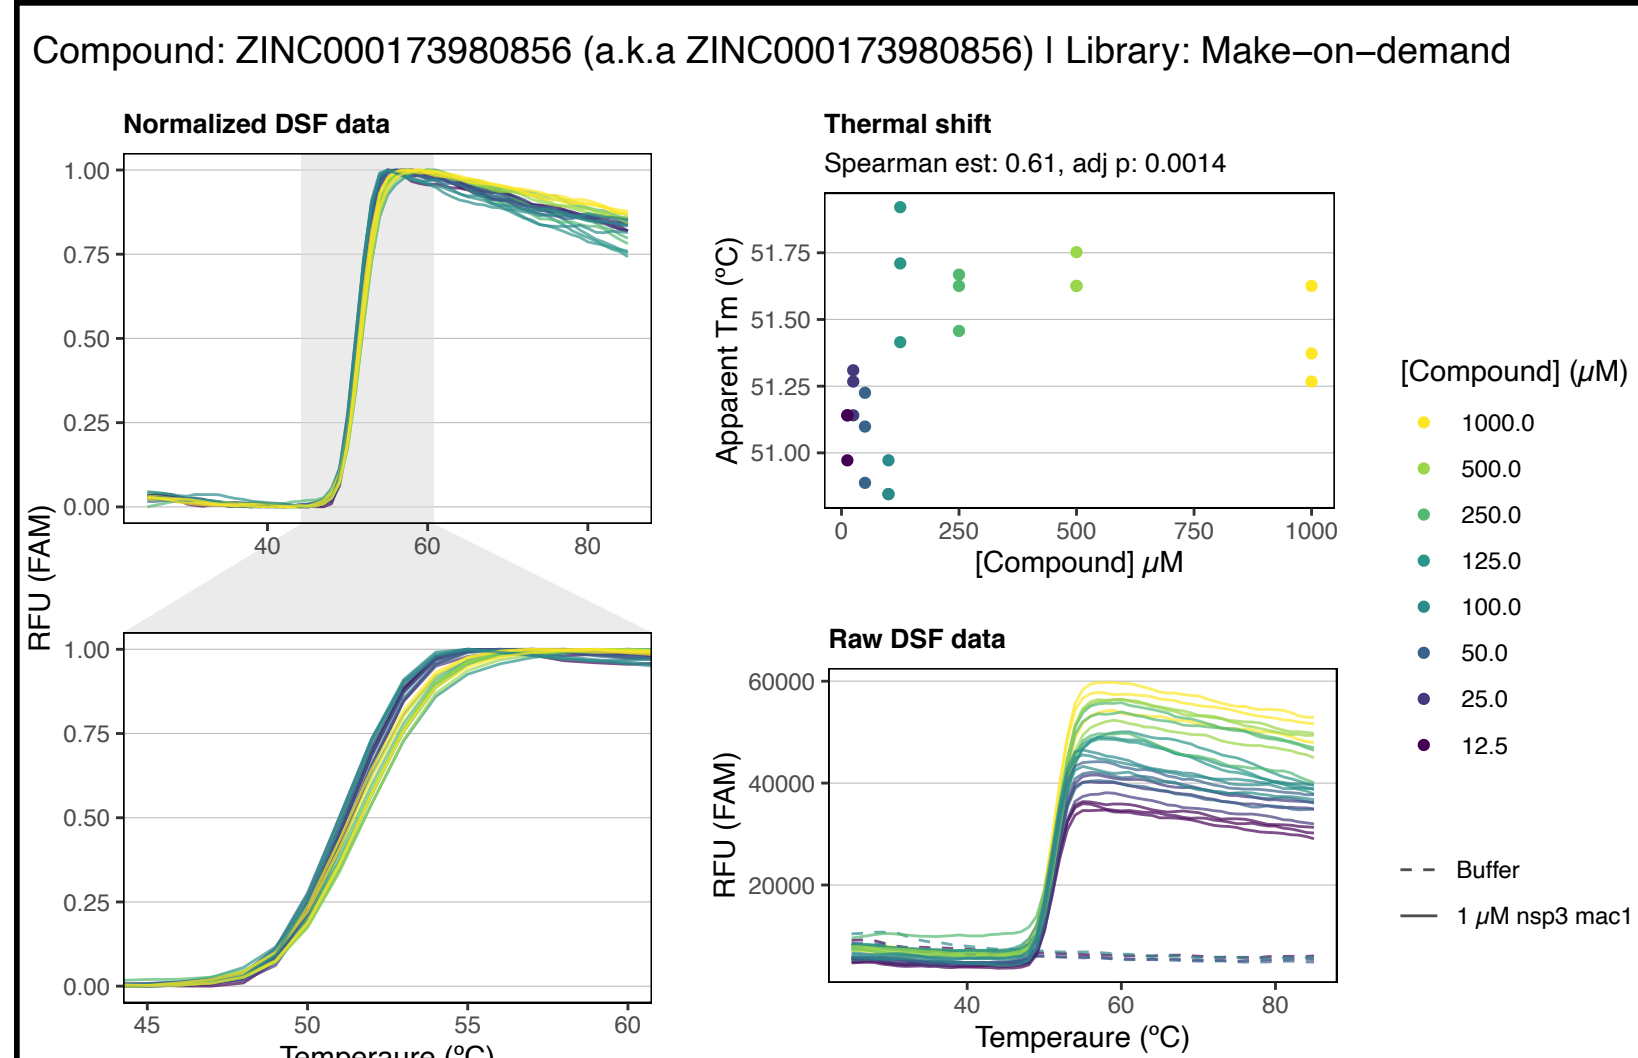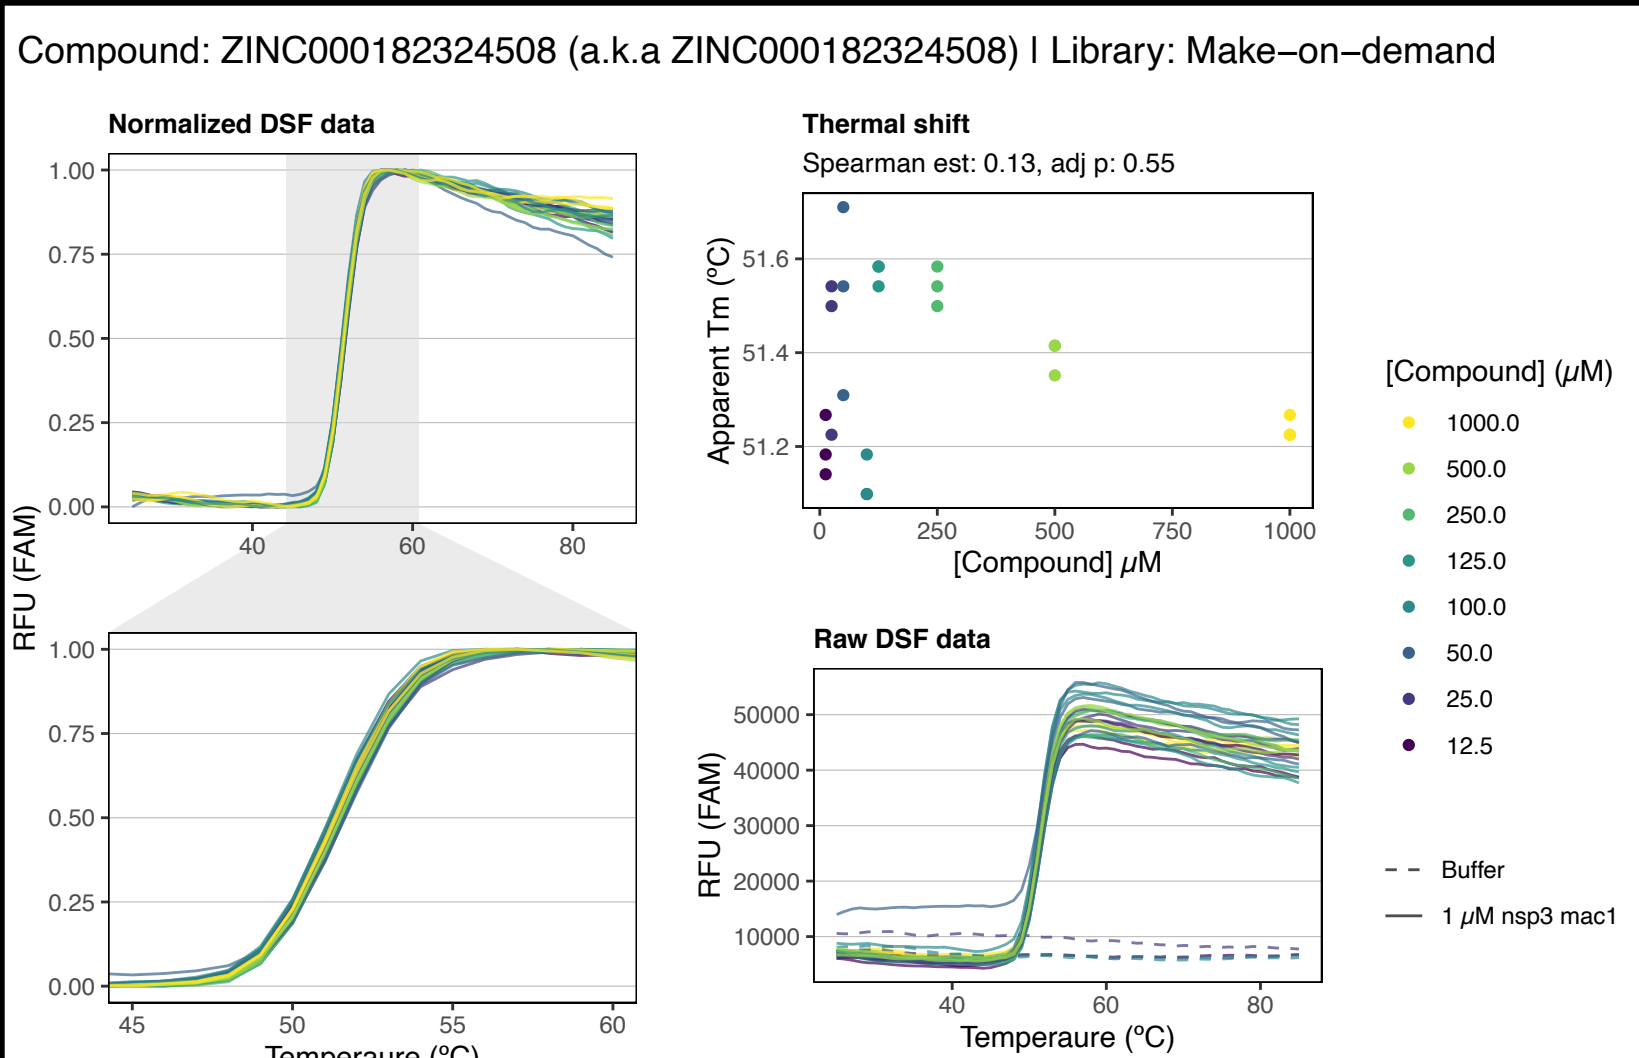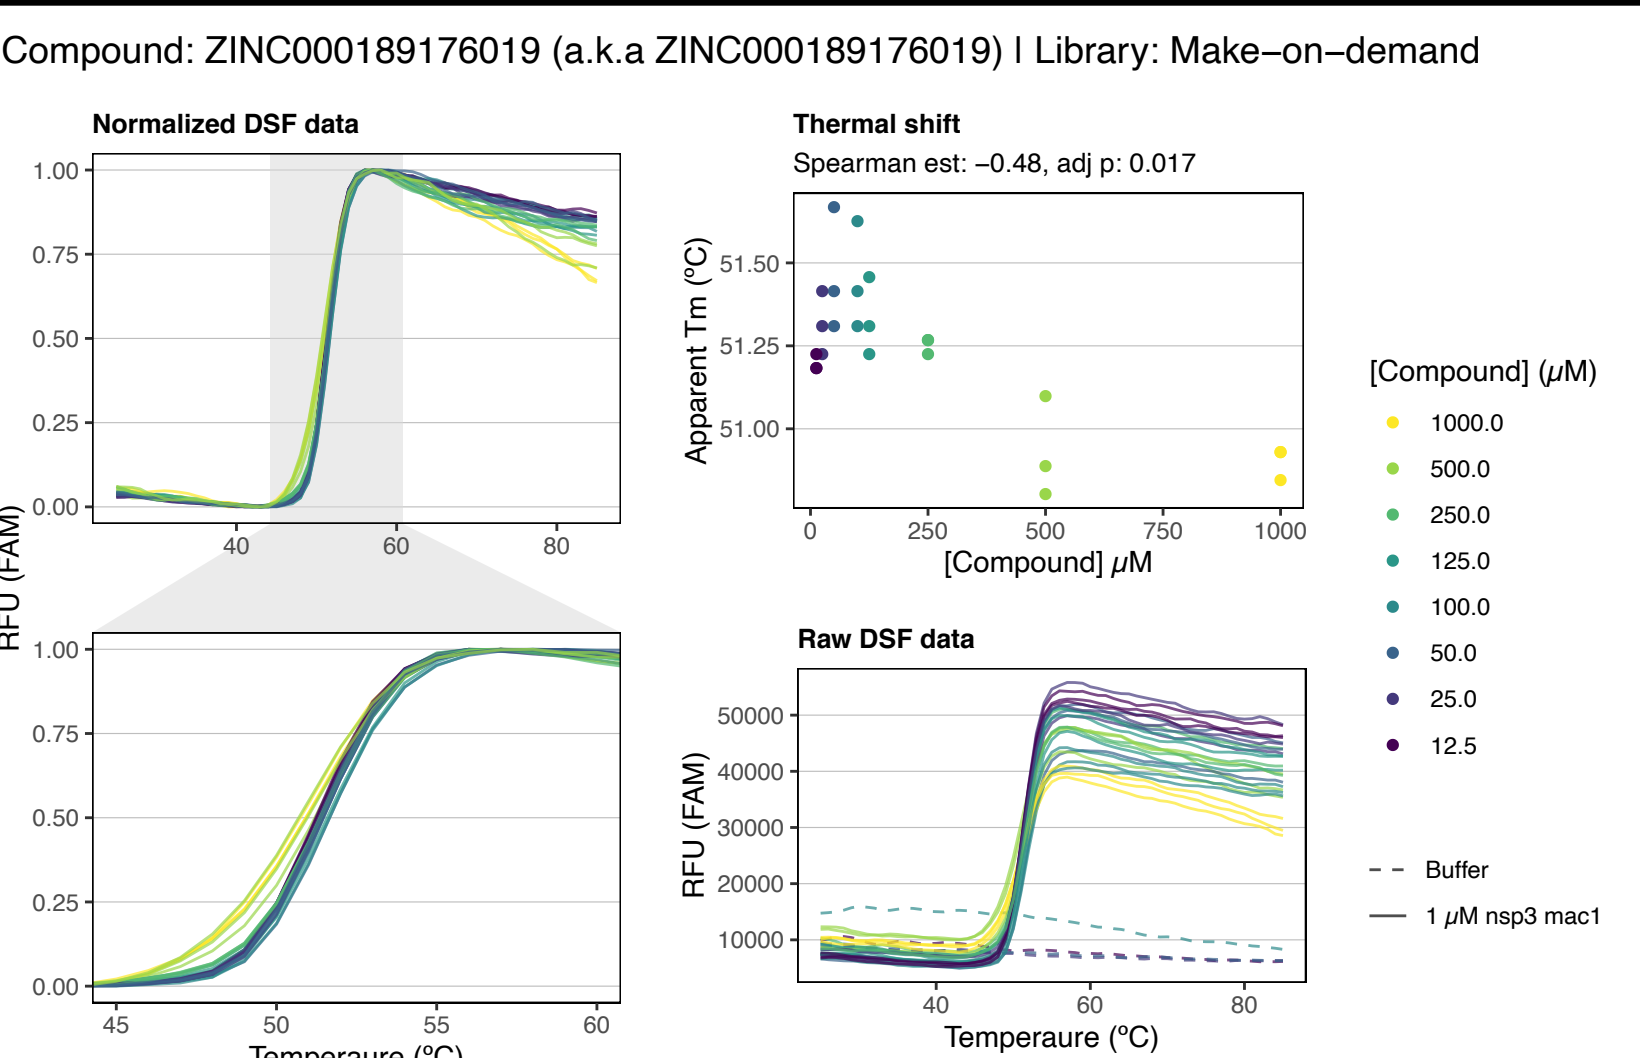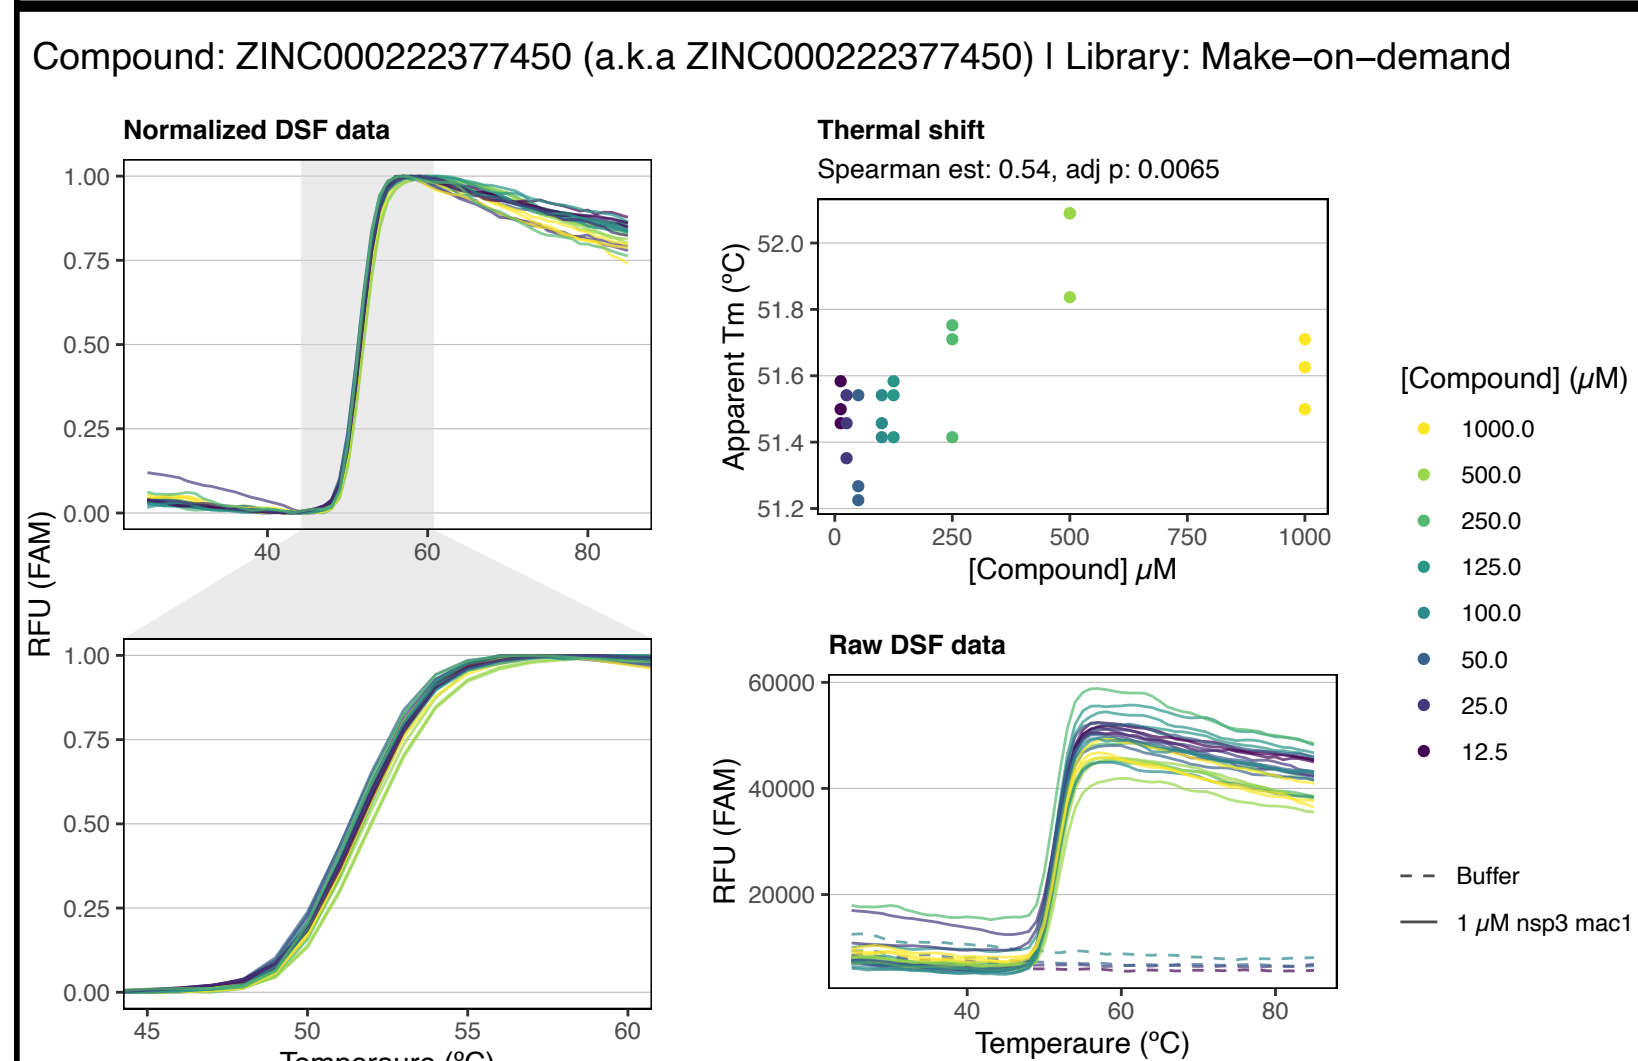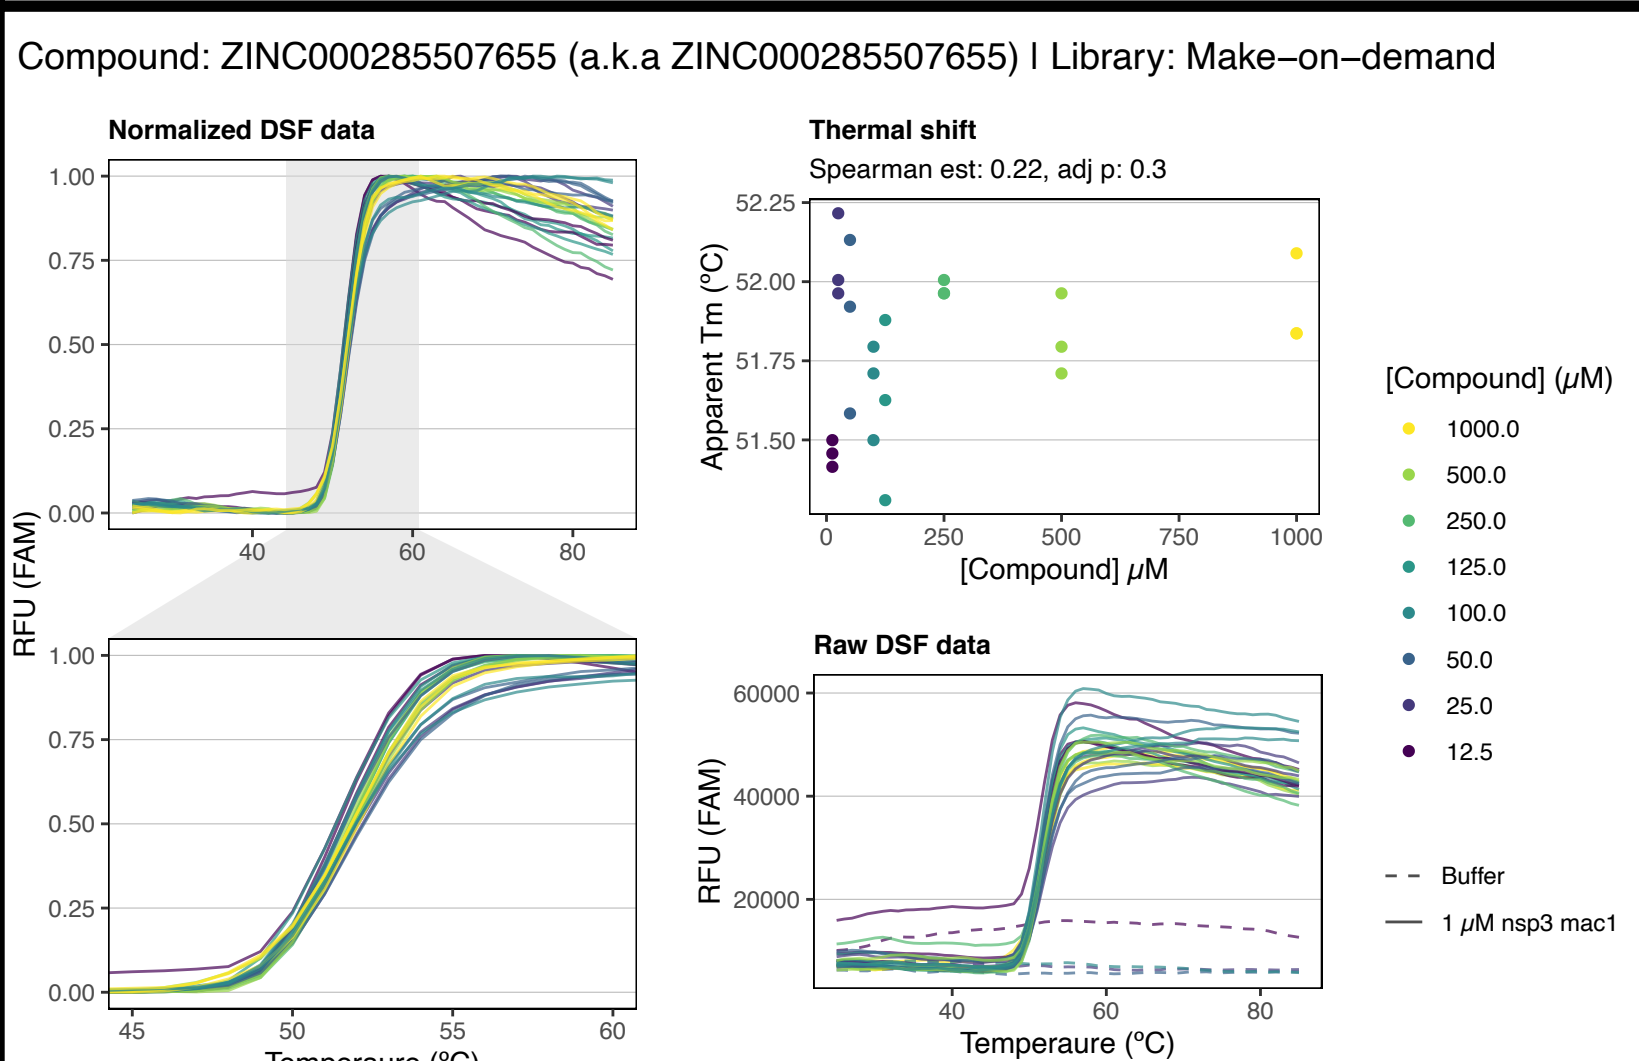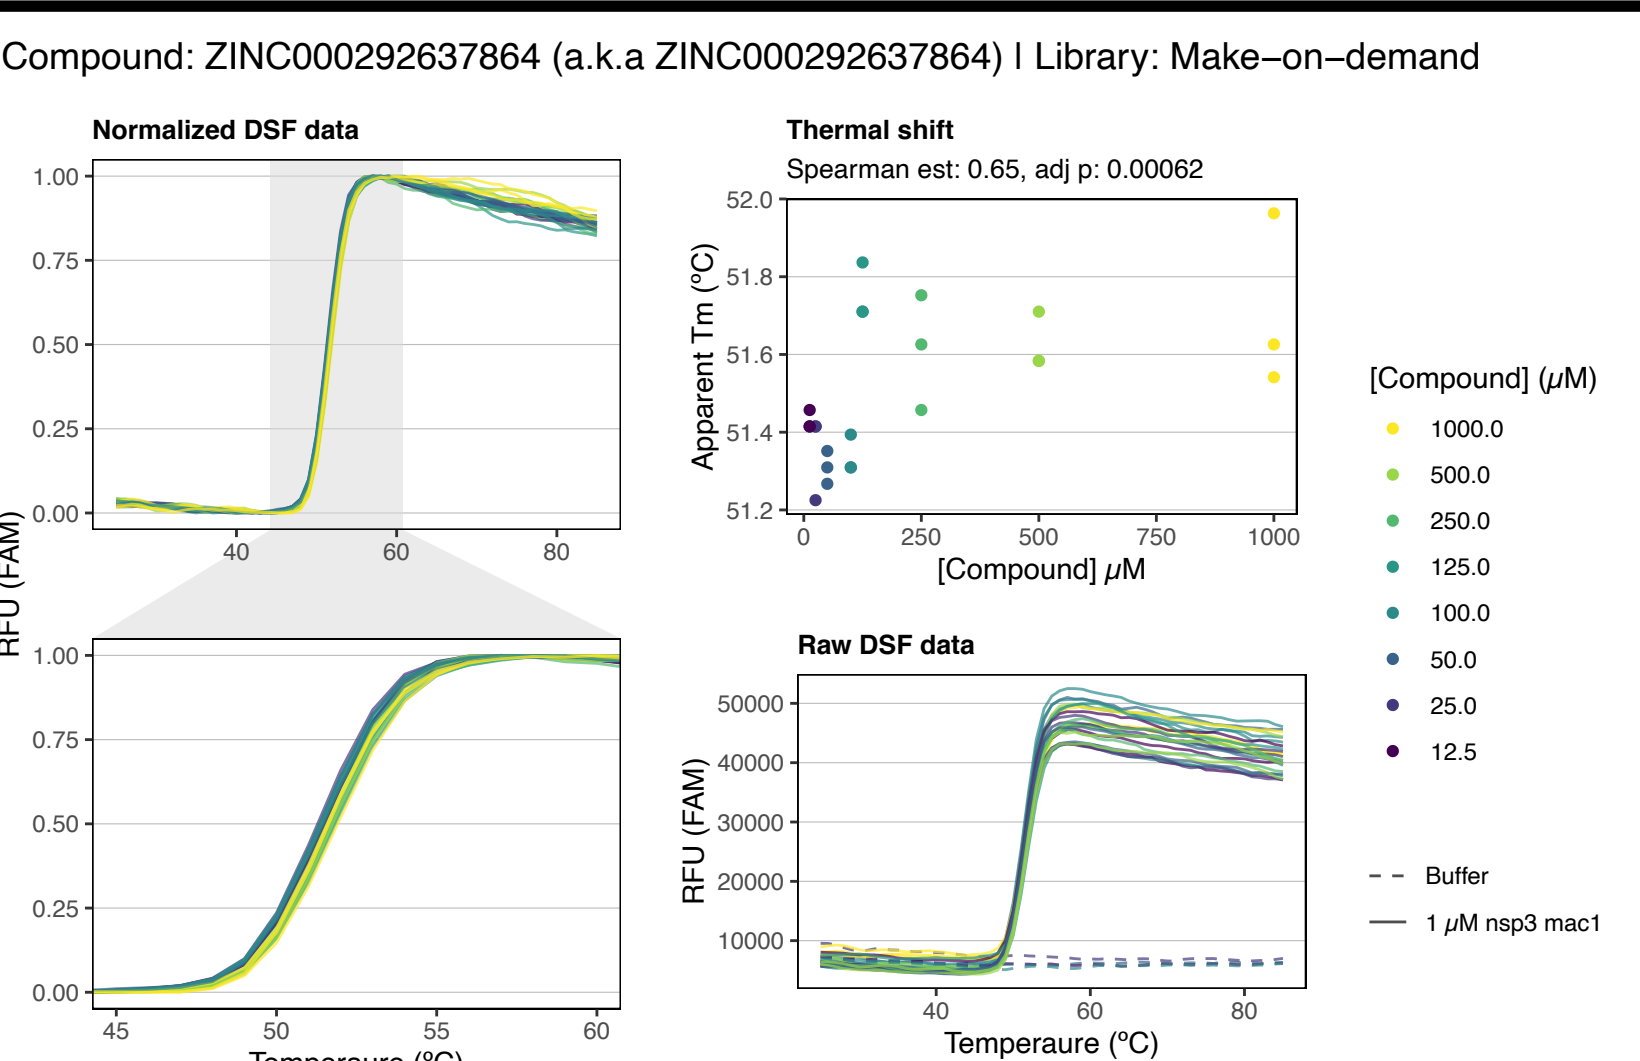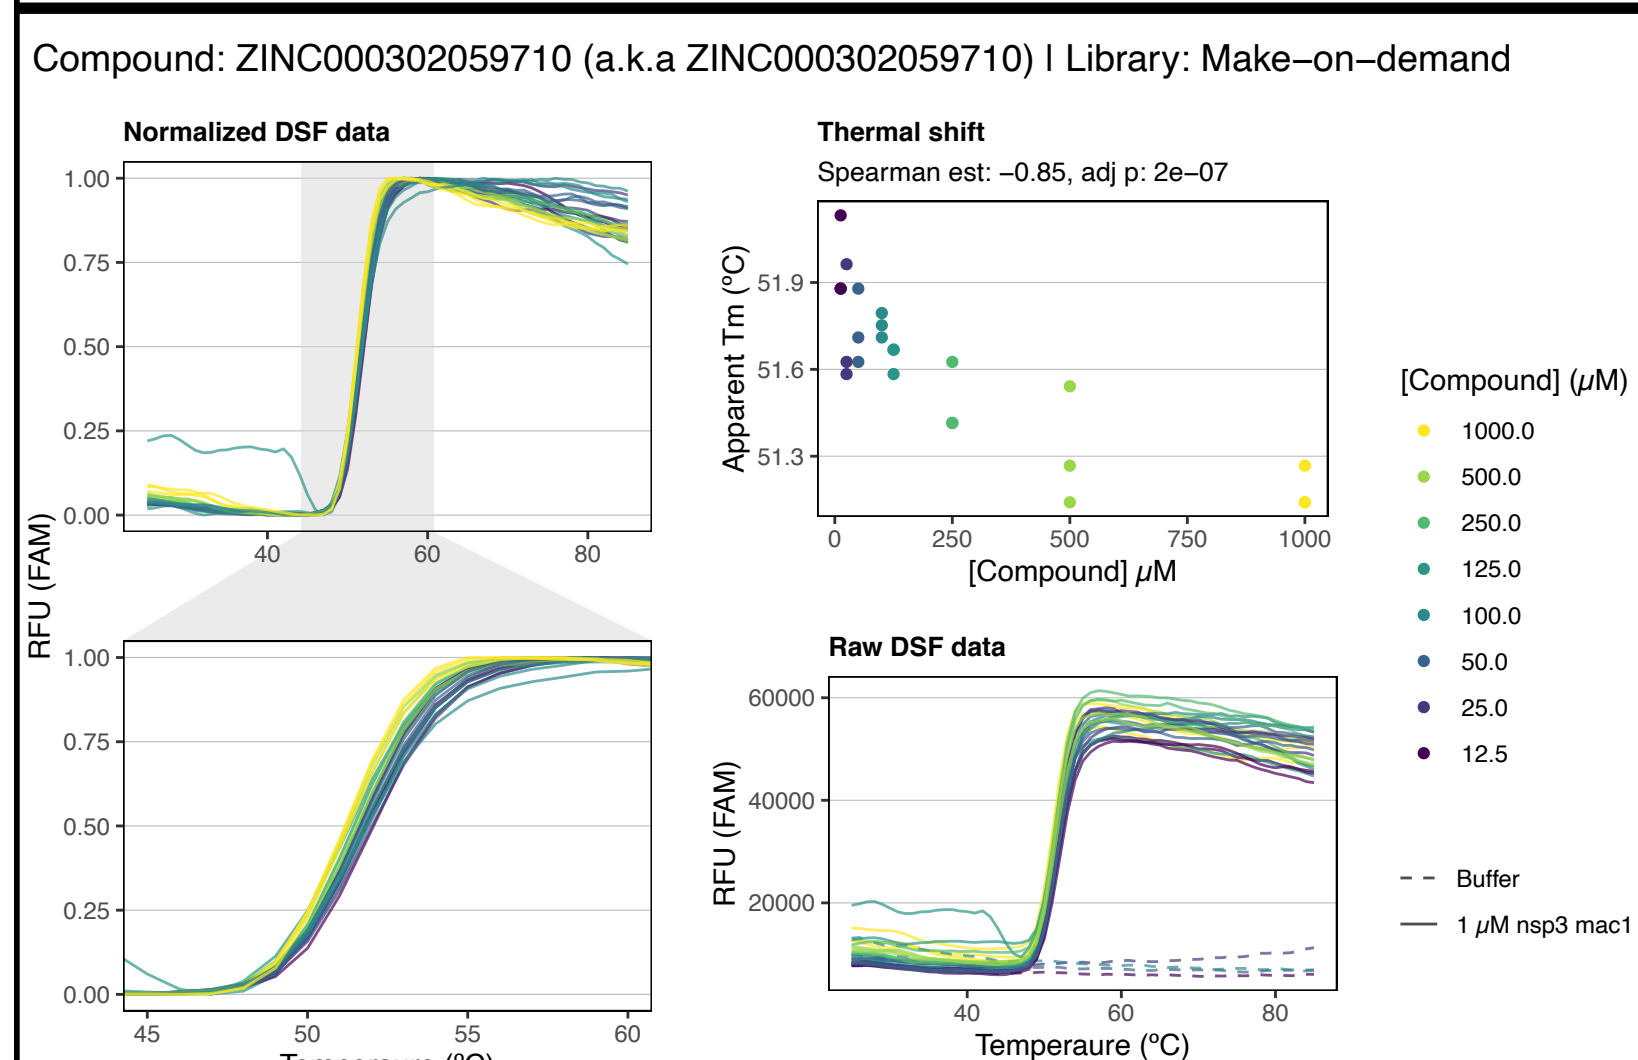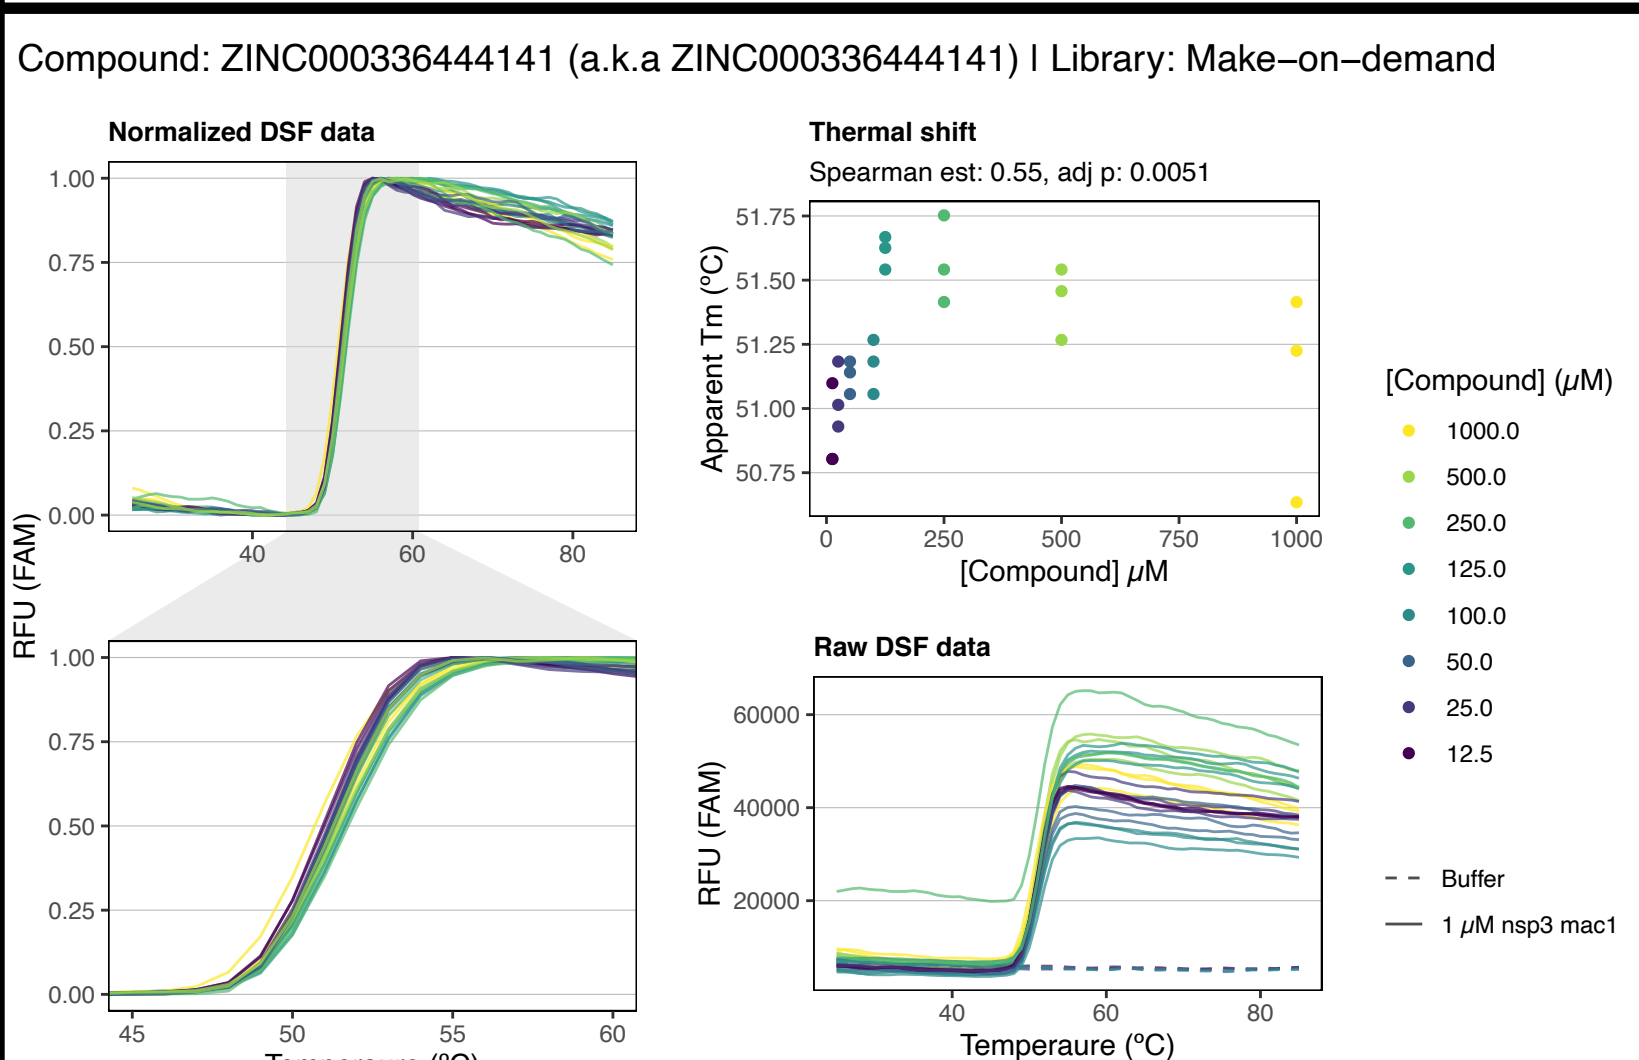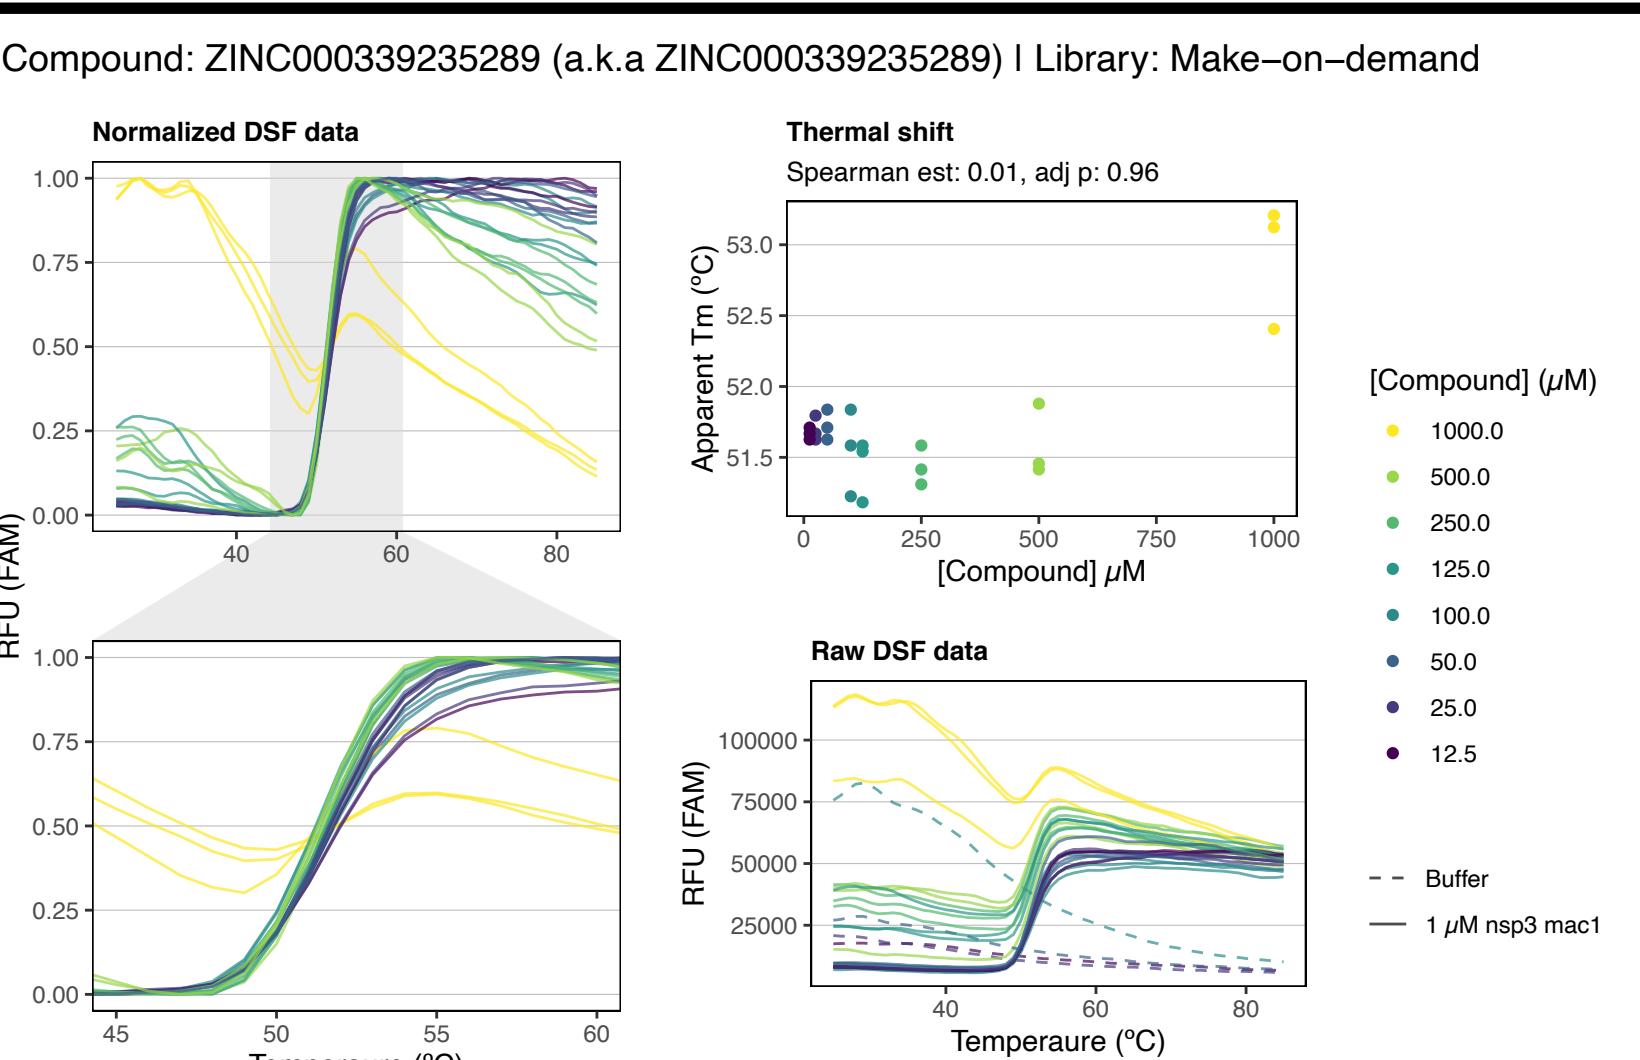

Compound: ZINC00034585262 (a.k.a. ZINC00034585262) | Library: Make-on-demand

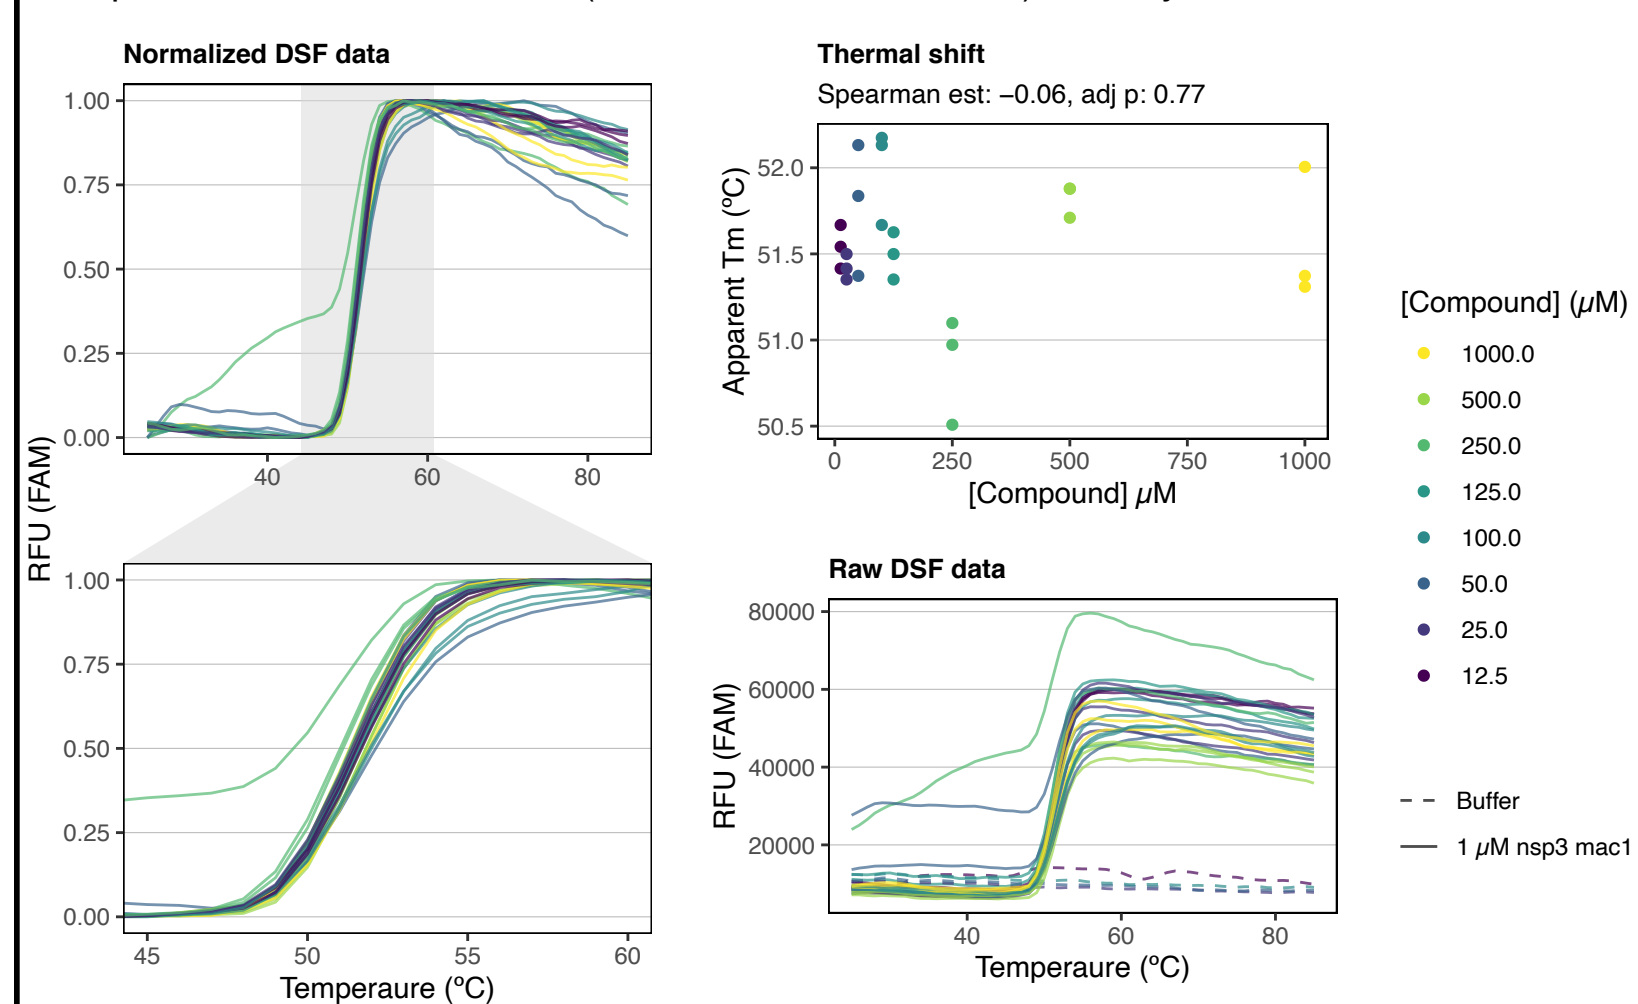

Compound: ZINC000350686468 (a.k.a. ZINC000350686468) | Library: Make-on-demand

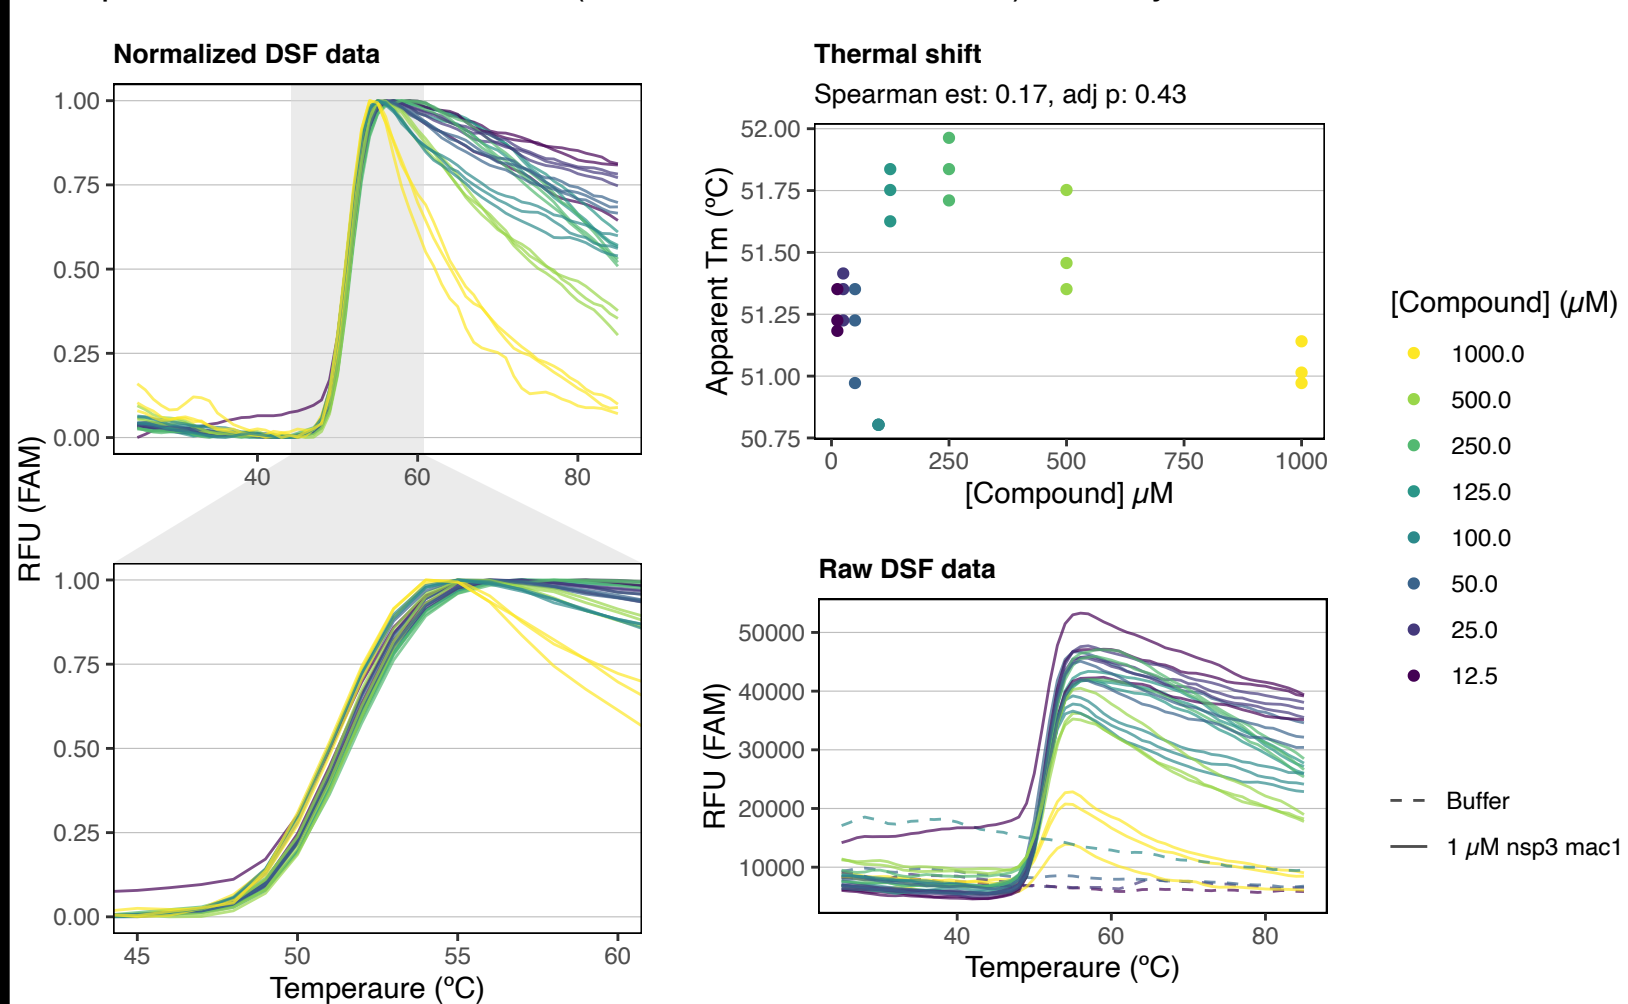

Compound: ZINC000350813789 (a.k.a. ZINC000350813789) | Library: Make-on-demand

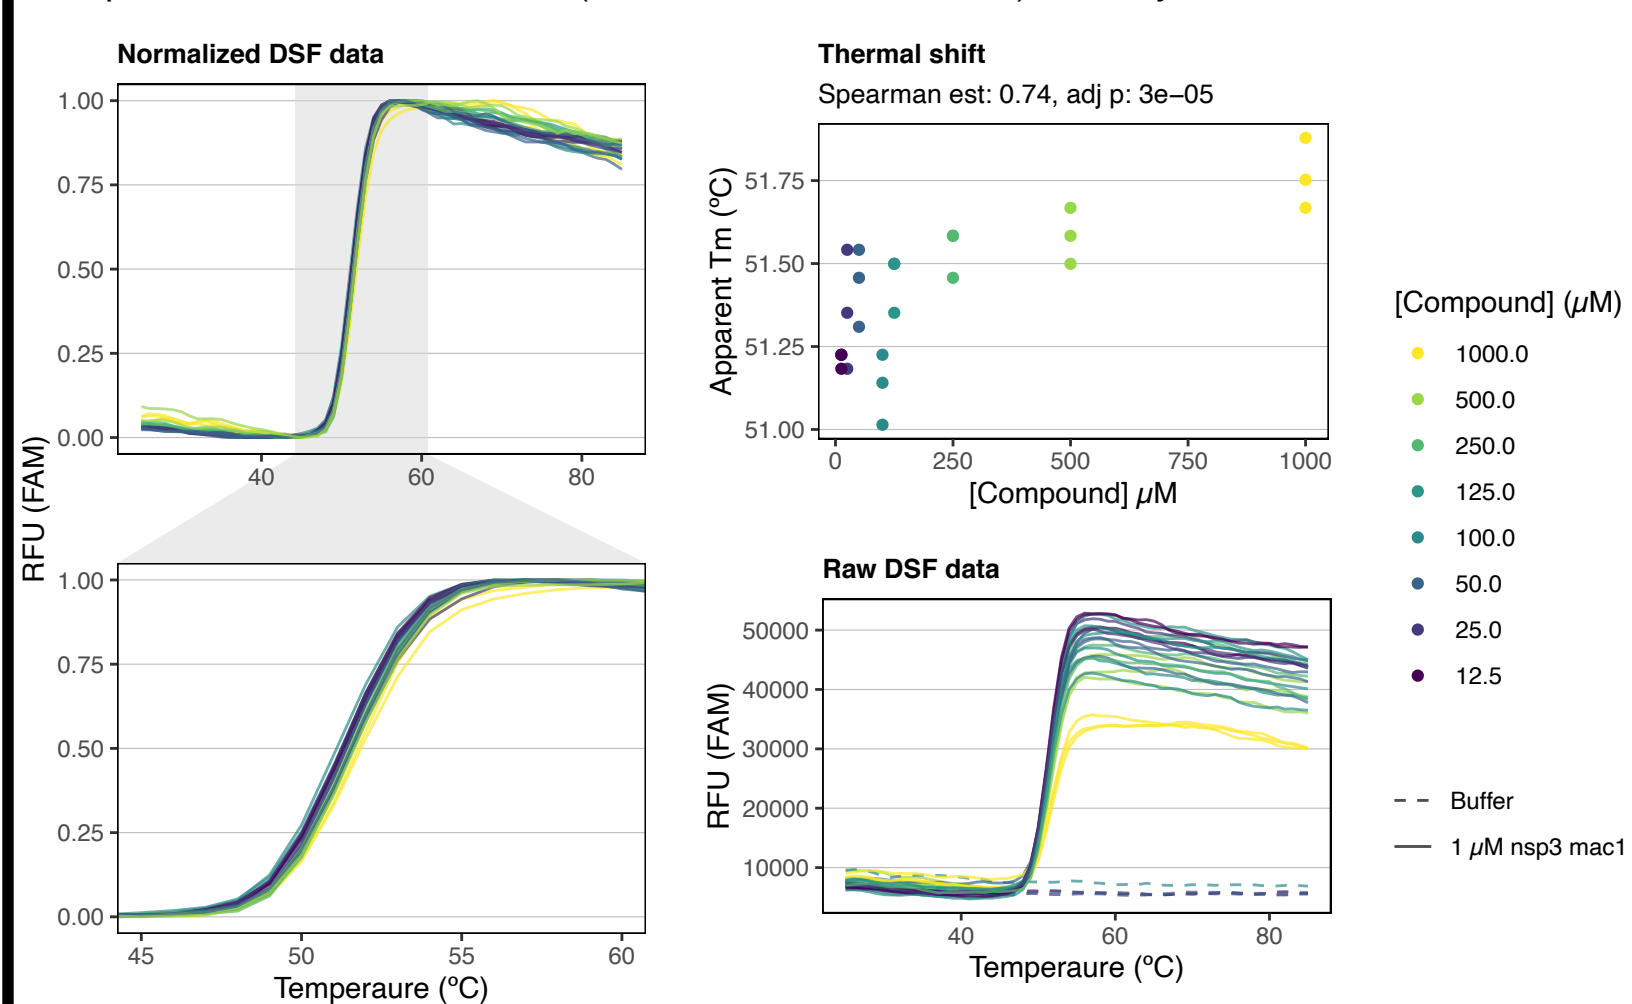

Compound: ZINC000351161347 (a.k.a. ZINC000351161347) | Library: Make-on-demand

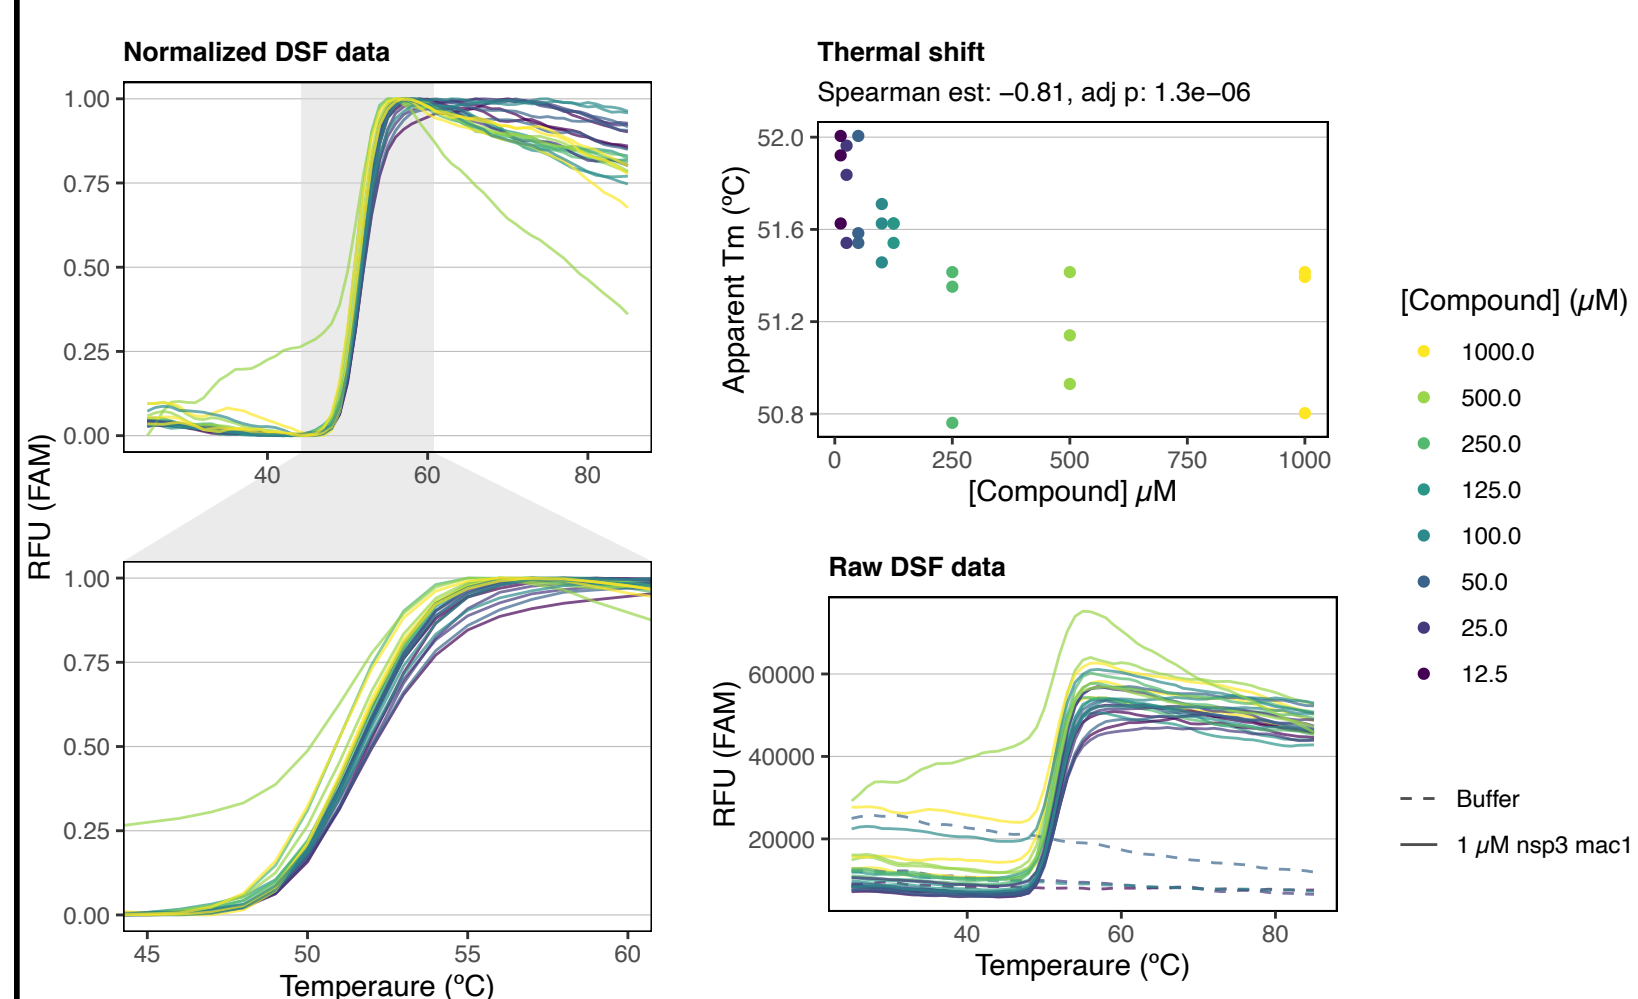

Compound: ZINC000352369310 (a.k.a. ZINC000352369310) | Library: Make-on-demand

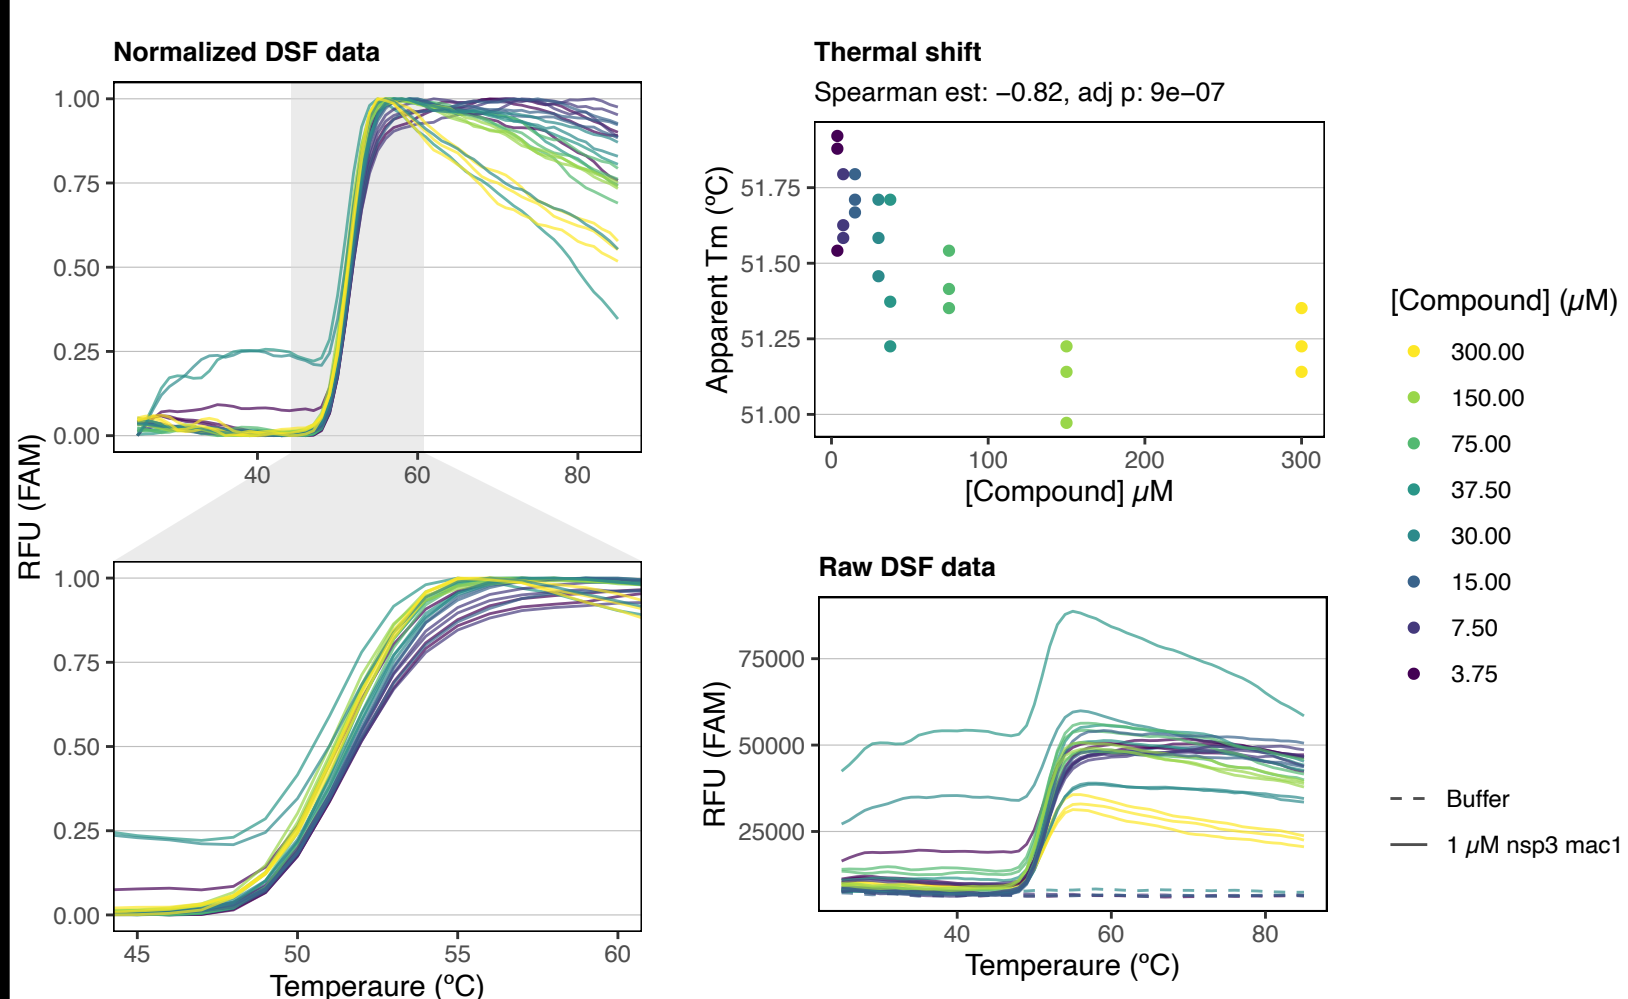

Compound: ZINC000352487041 (a.k.a. ZINC000352487041) | Library: Make-on-demand

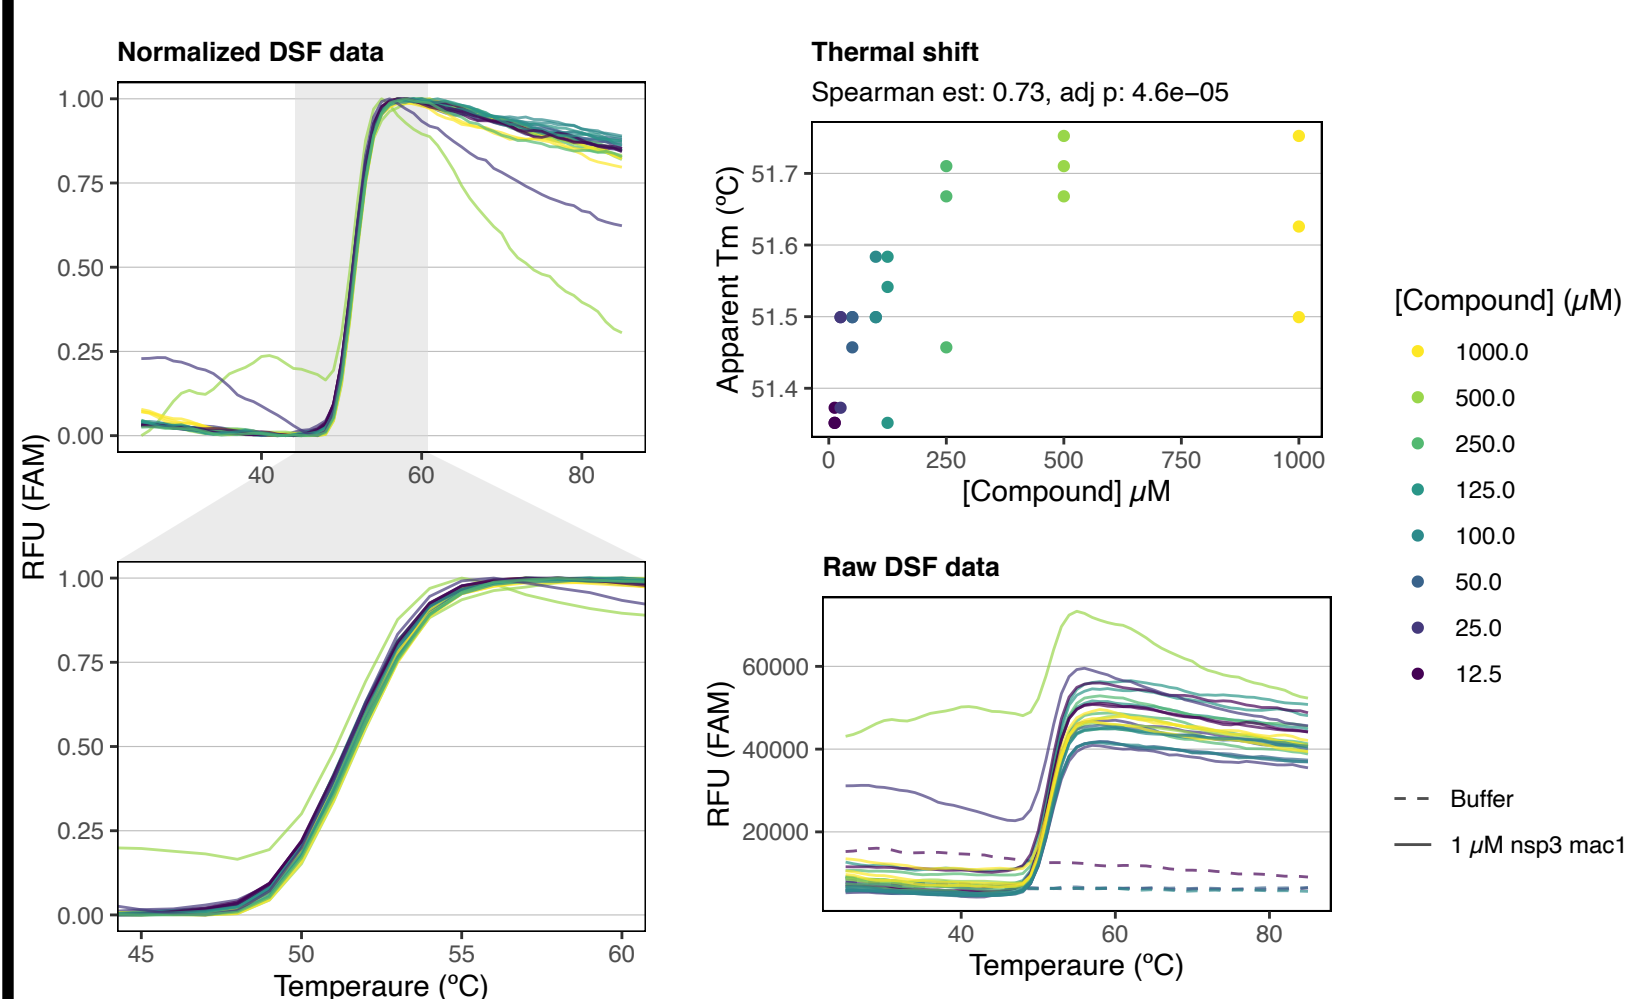

Compound: ZINC000356759652 (a.k.a. ZINC000356759652) | Library: Make-on-demand

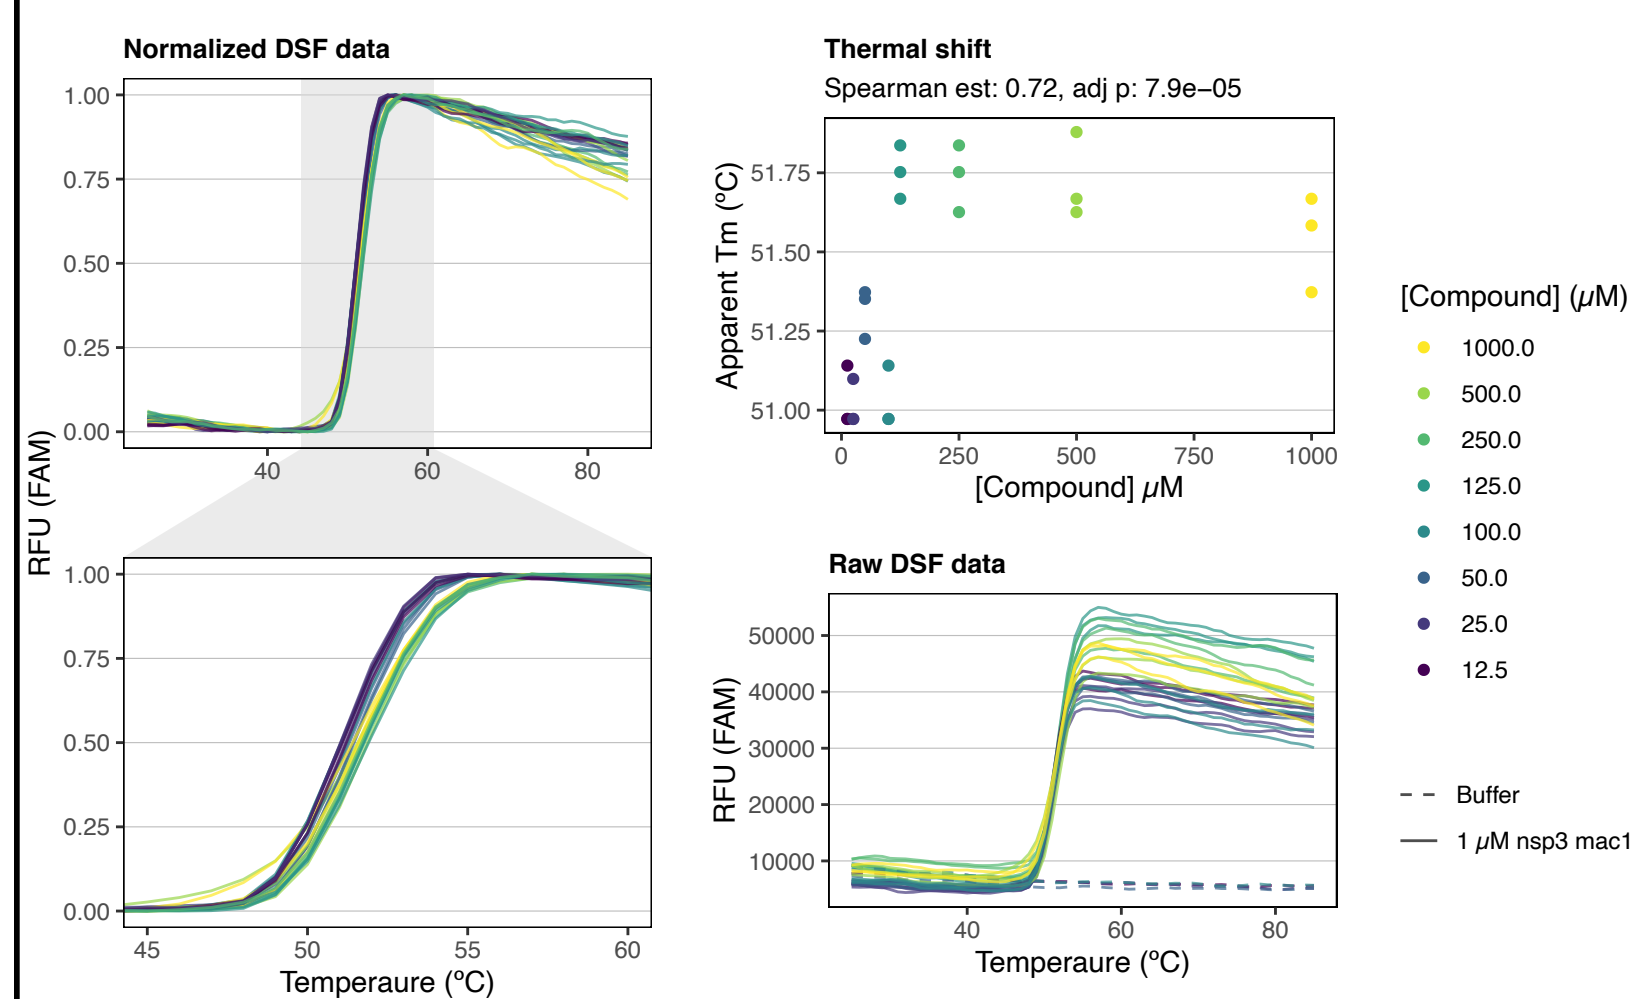

Compound: ZINC000359061121 (a.k.a. ZINC000359061121) | Library: Make-on-demand

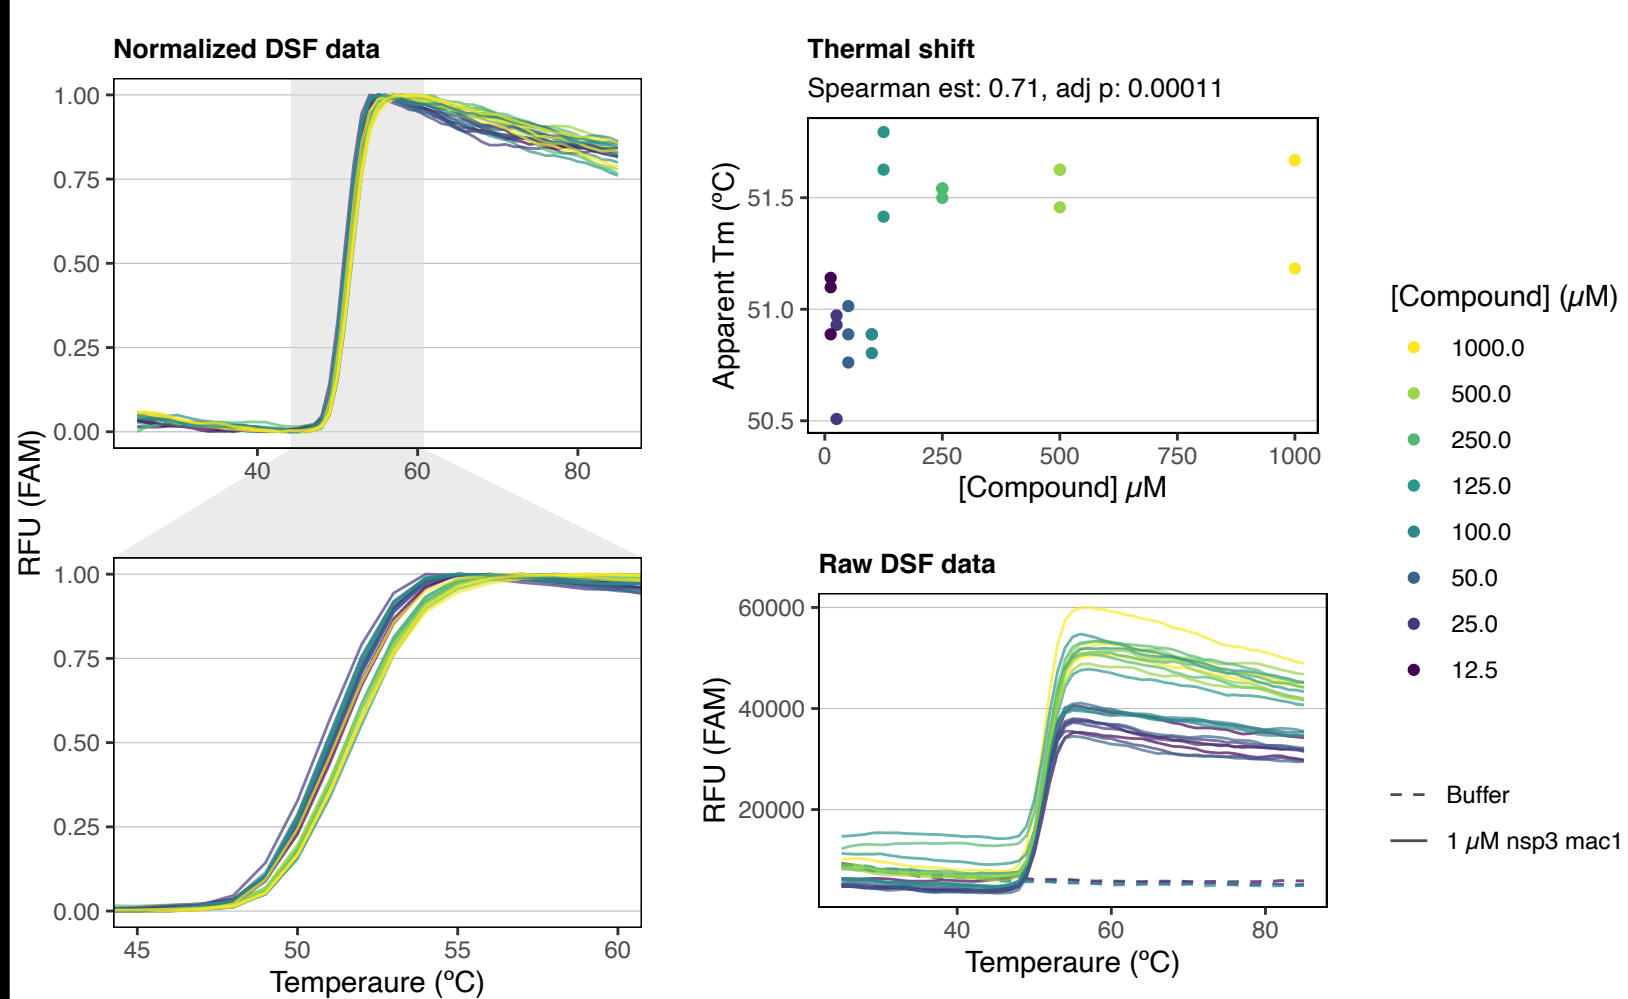

Compound: ZINC000368135547 (a.k.a. ZINC000368135547) | Library: Make-on-demand

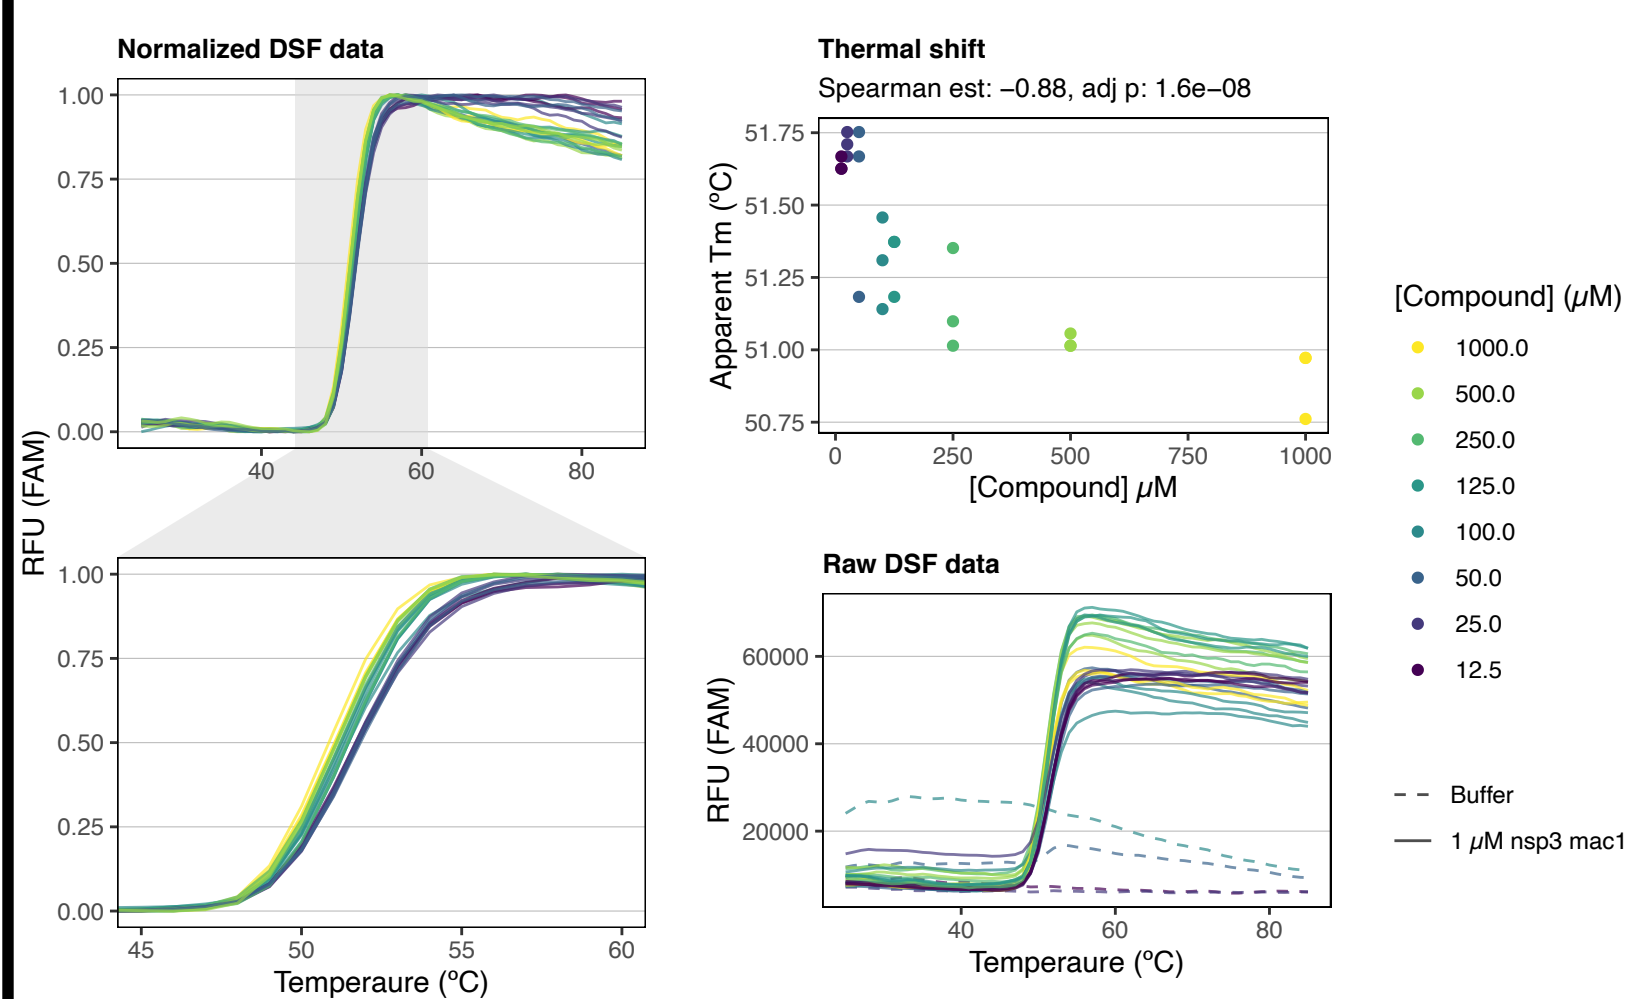

Compound: ZINC000371562024 (a.k.a. ZINC000371562024) | Library: Make-on-demand

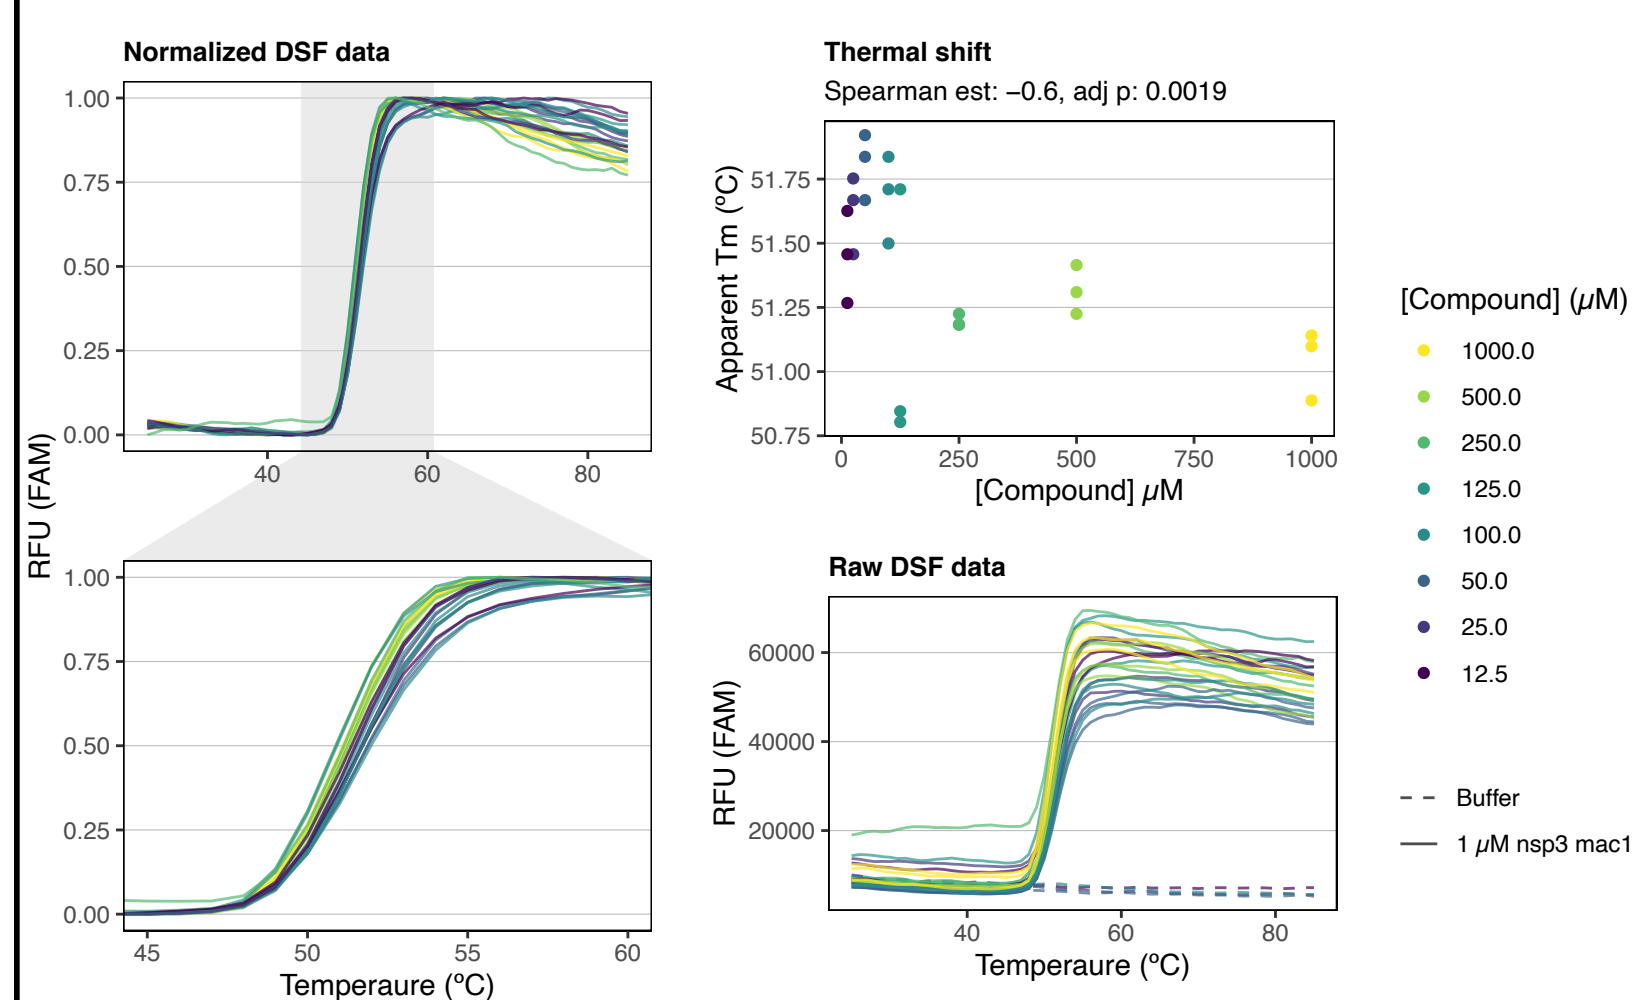

Compound: ZINC000371804911 (a.k.a. ZINC000371804911) | Library: Make-on-demand

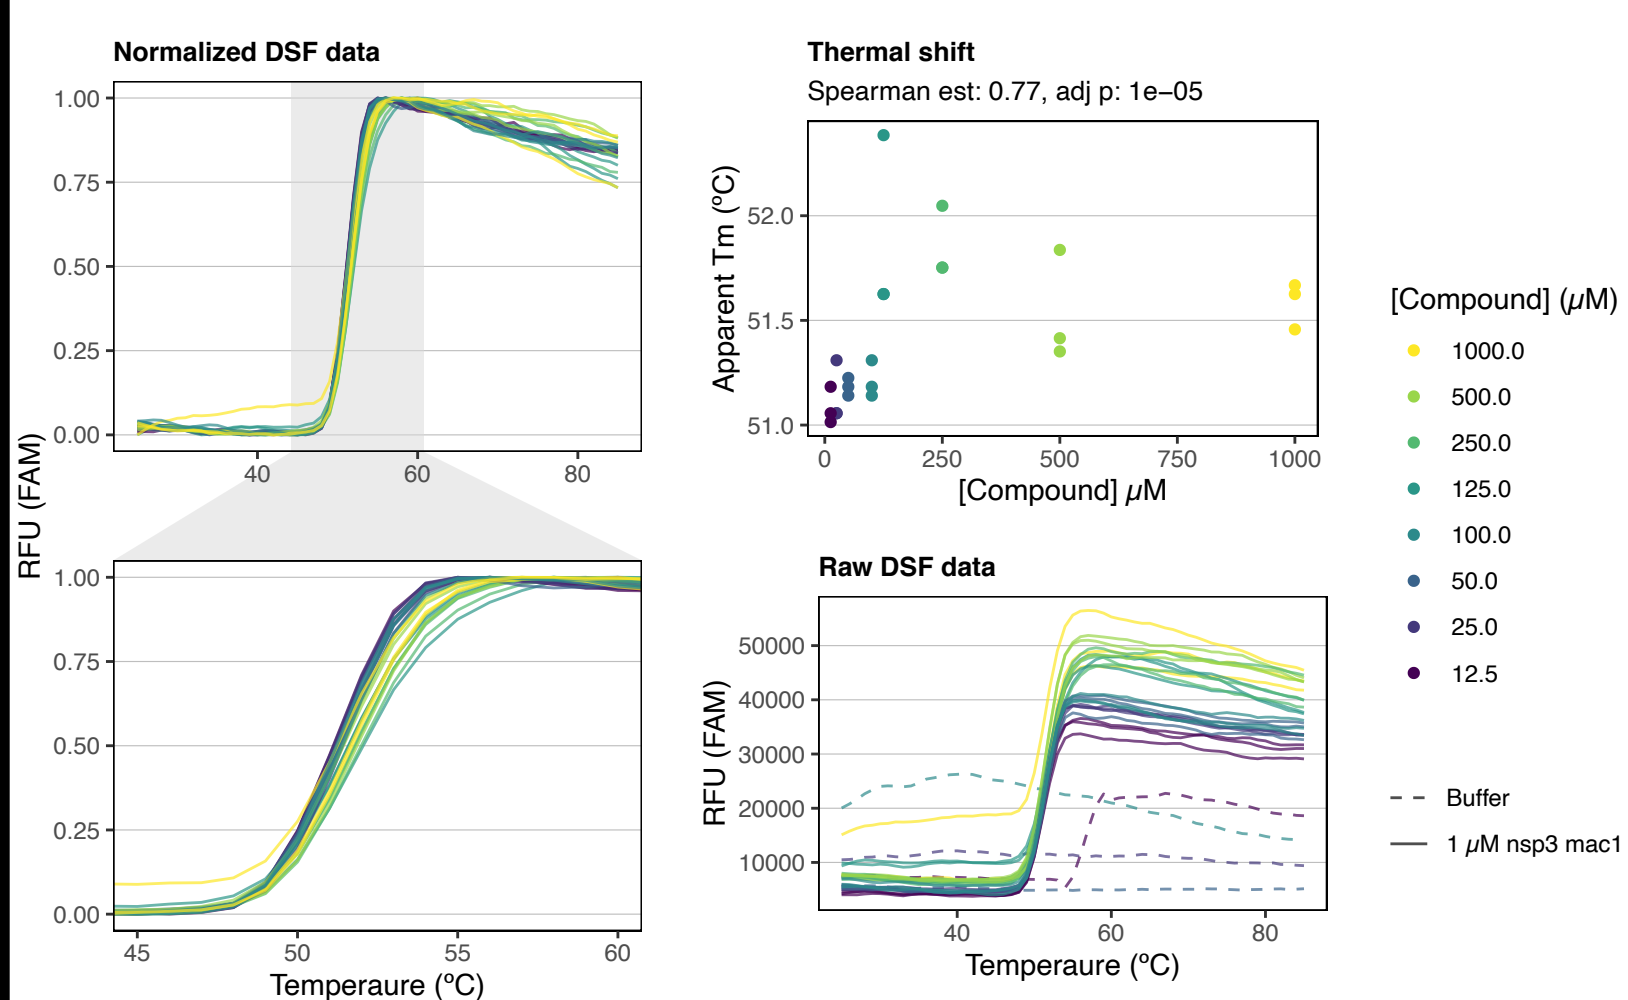

Compound: ZINC000373034135 (a.k.a. ZINC000373034135) | Library: Make-on-demand

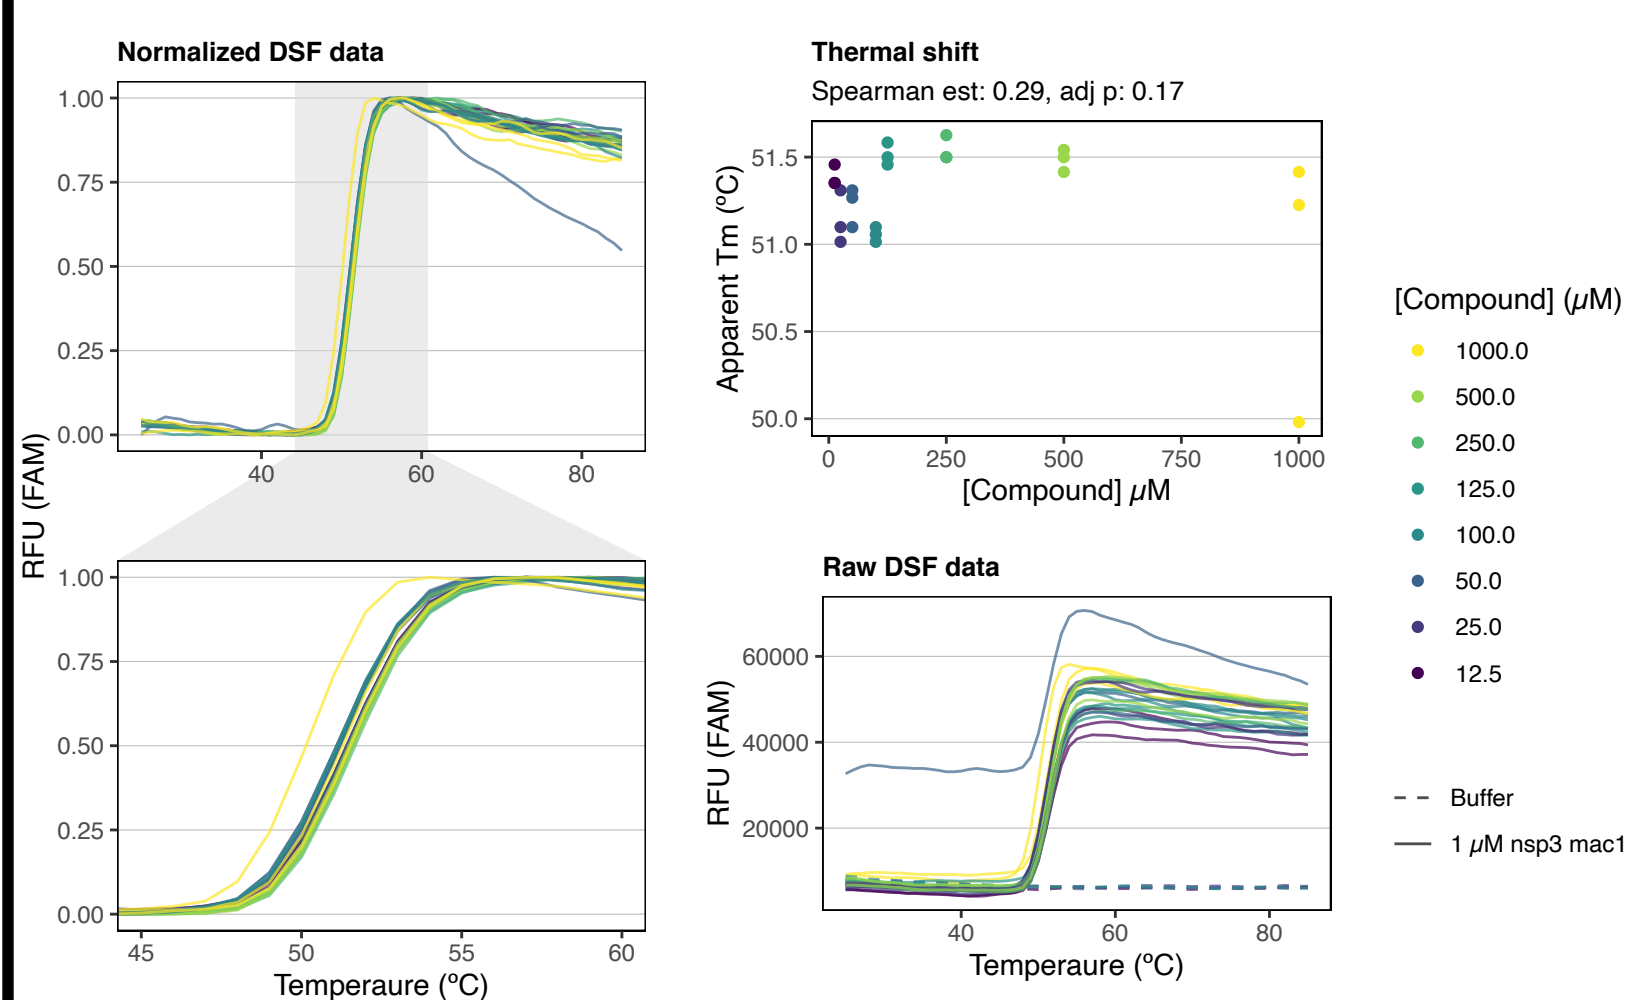

Compound: ZINC000413143167 (a.k.a. ZINC000413143167) | Library: Make-on-demand

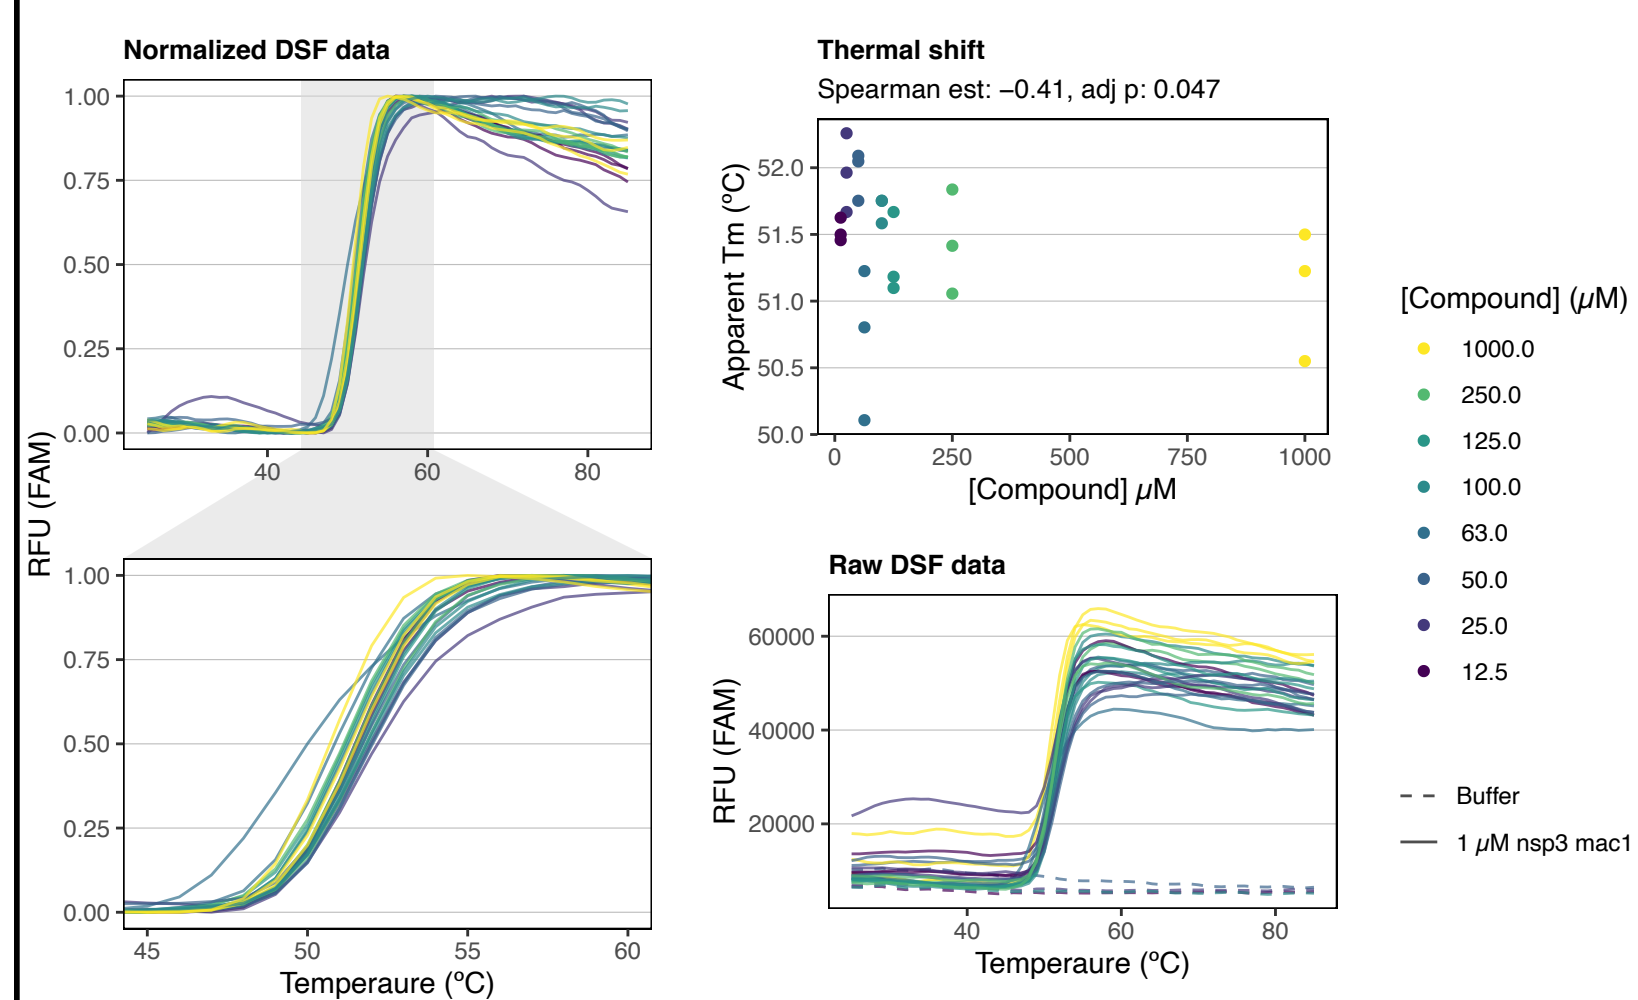

Compound: ZINC000450476923 (a.k.a. ZINC000450476923) | Library: Make-on-demand

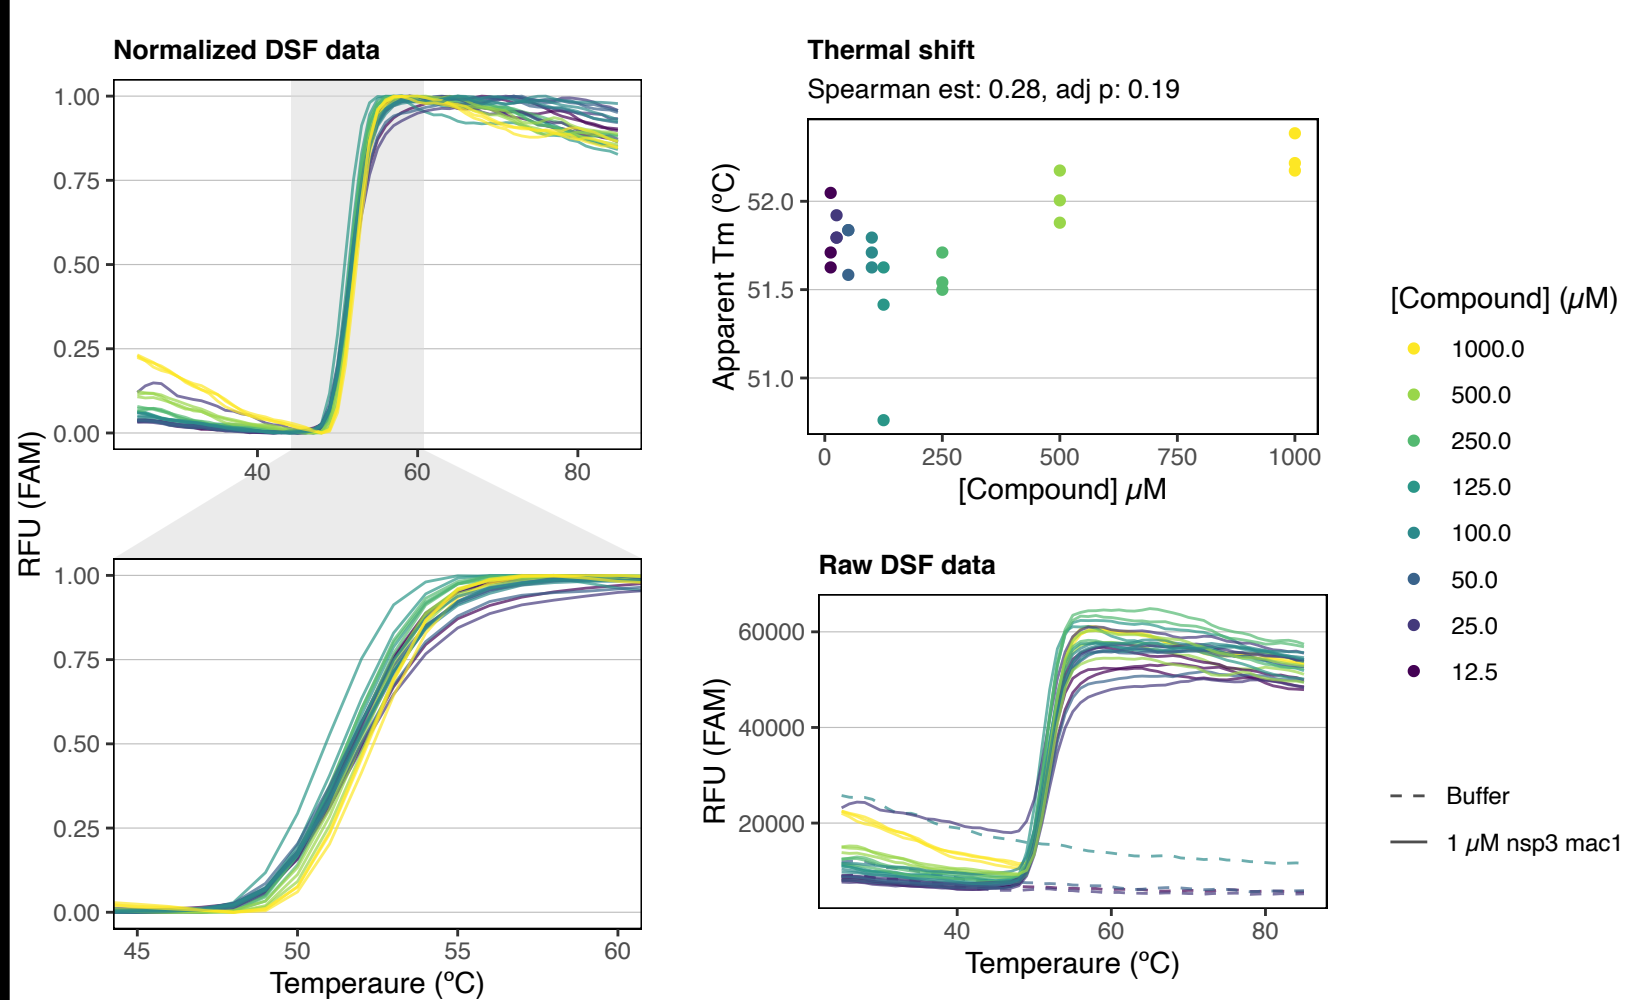

Compound: ZINC000542791186 (a.k.a. ZINC000542791186) | Library: Make-on-demand

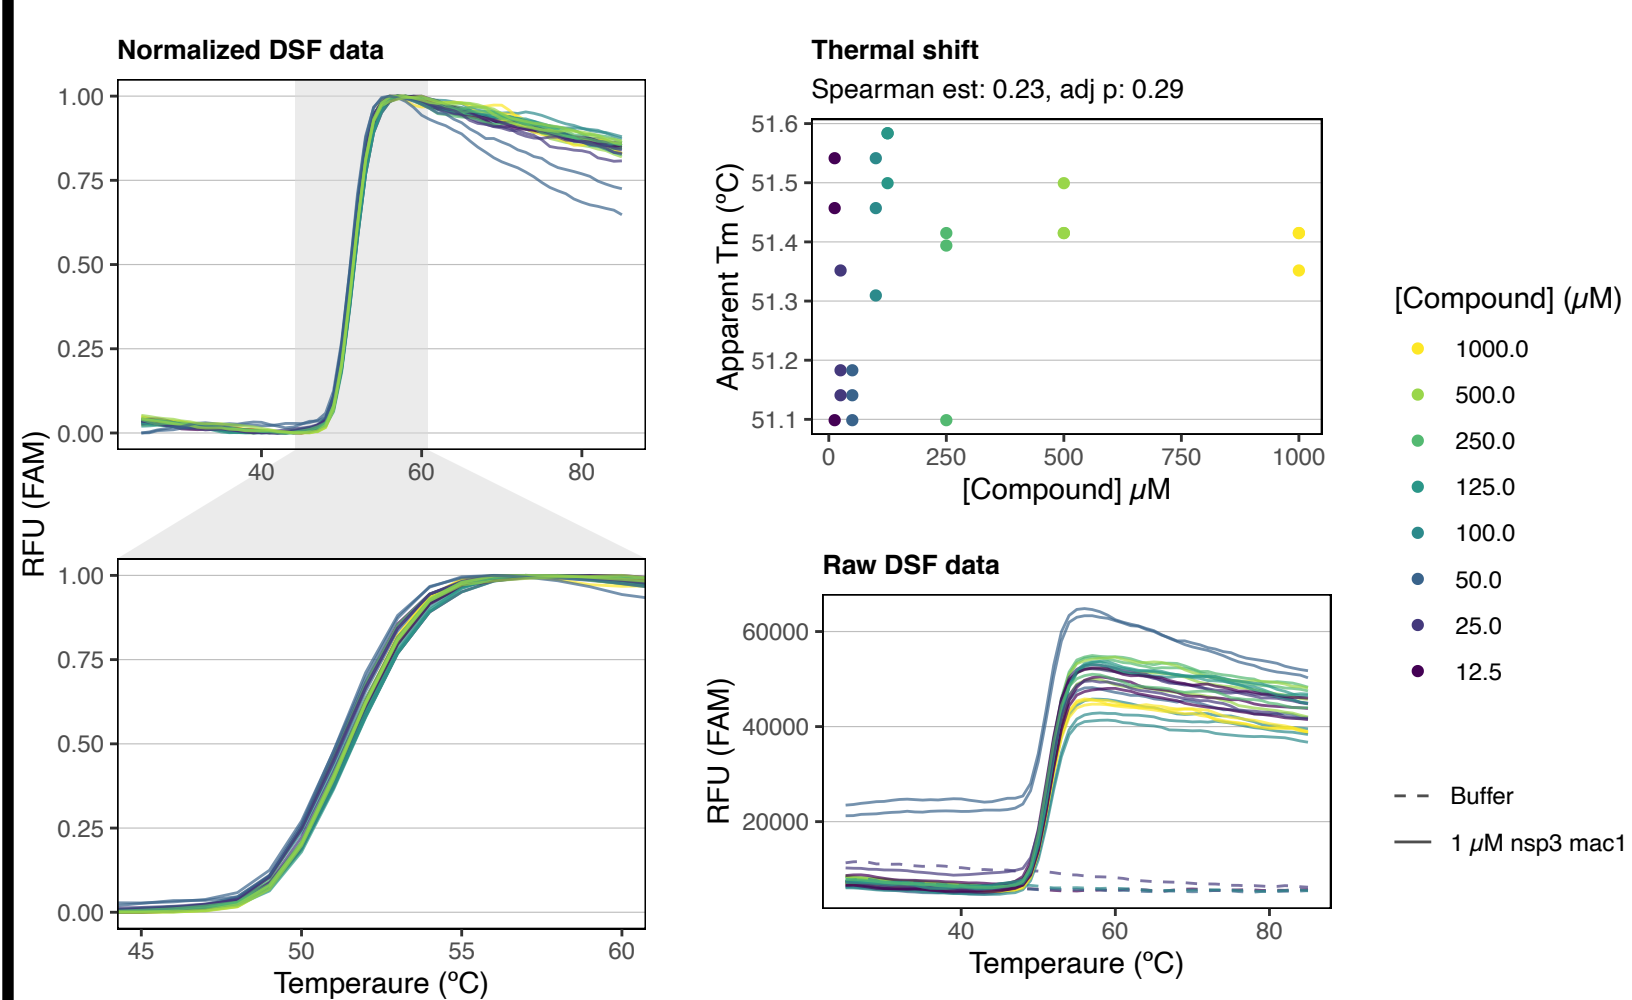

Compound: ZINC000546336511 (a.k.a. ZINC000546336511) | Library: Make-on-demand

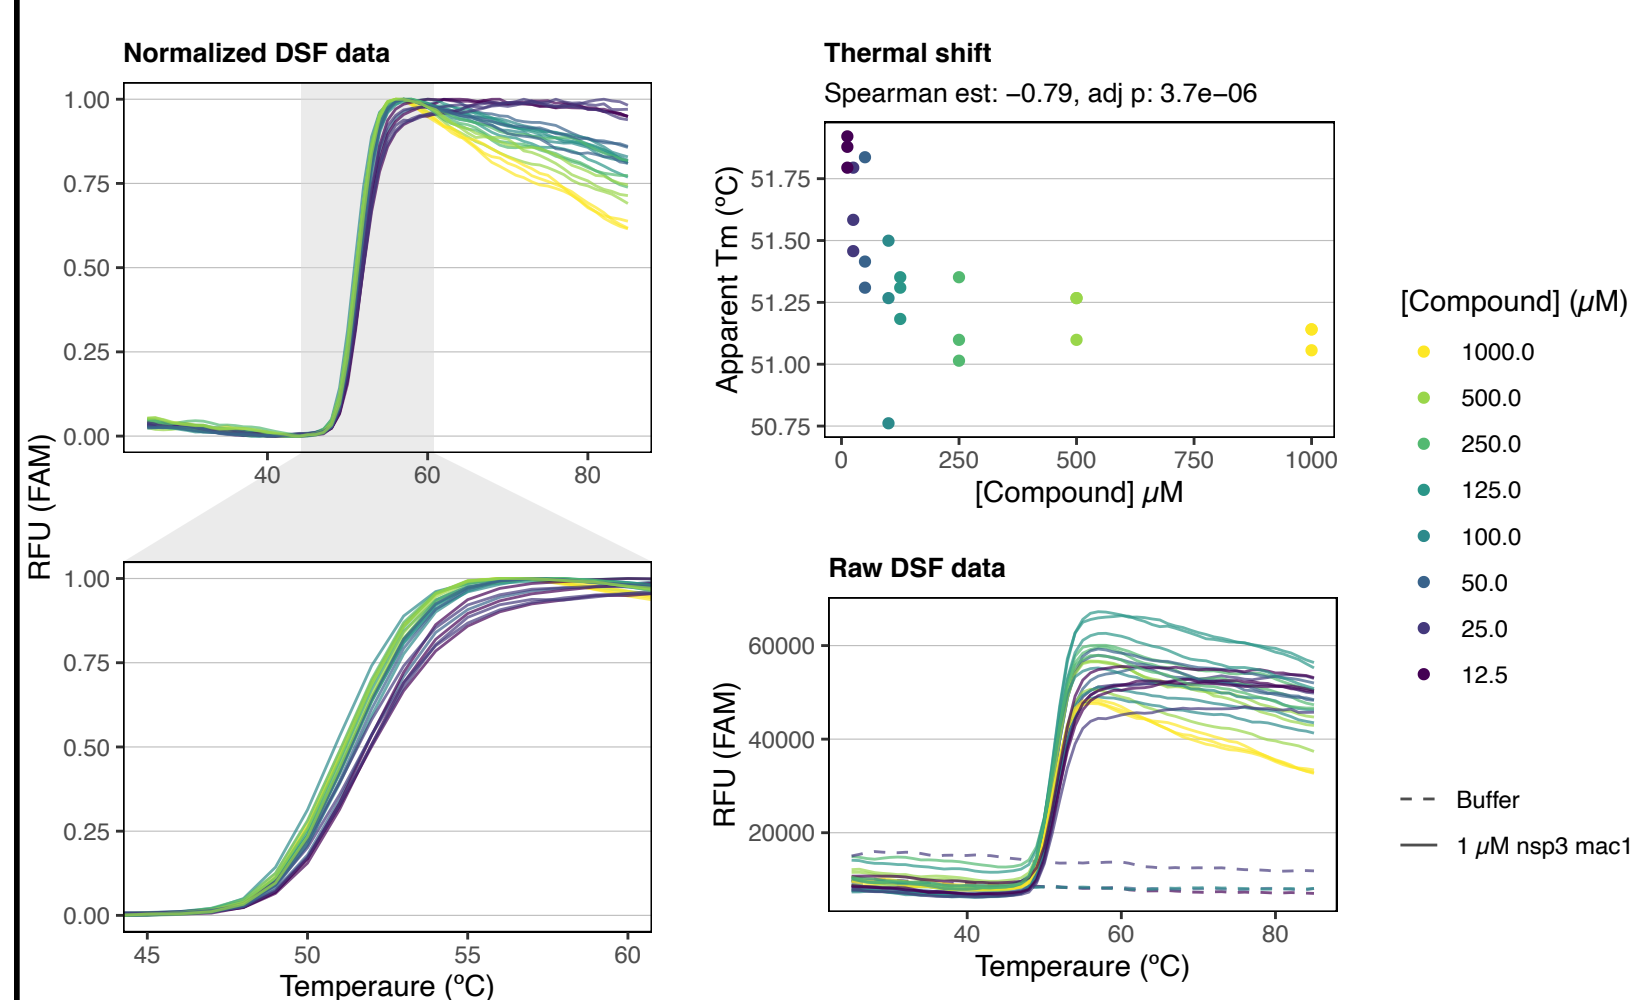

Compound: ZINC000559260078 (a.k.a. ZINC000559260078) | Library: Make-on-demand

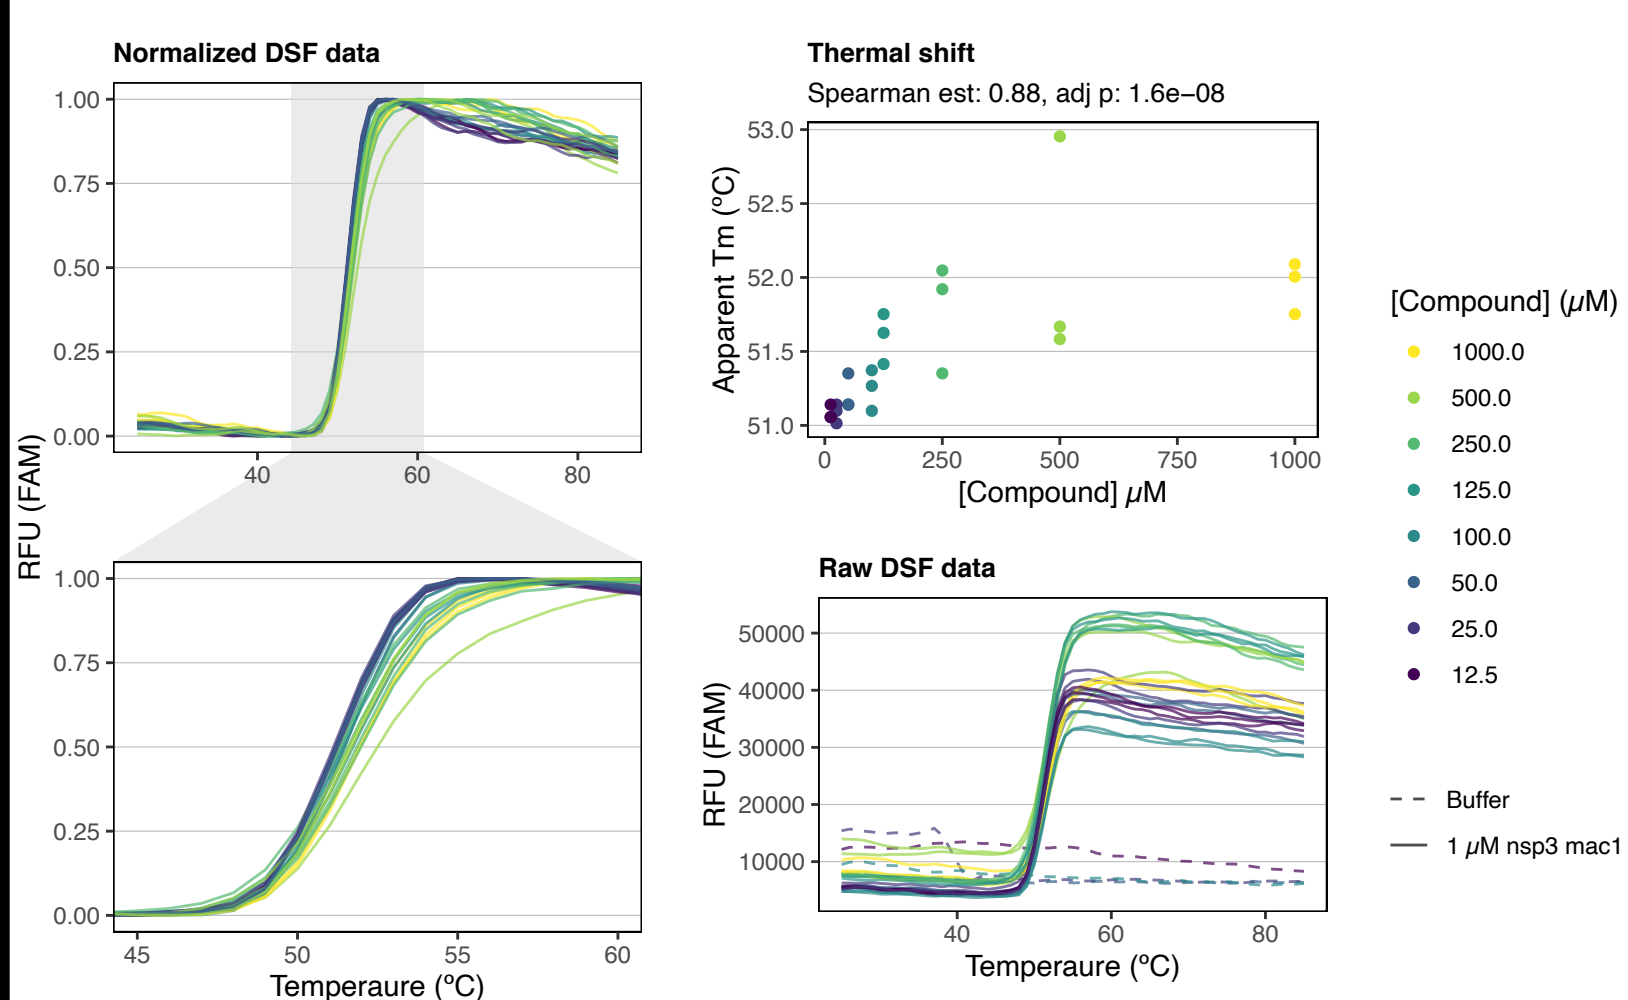

Compound: ZINC000570815972 (a.k.a. ZINC000570815972) | Library: Make-on-demand

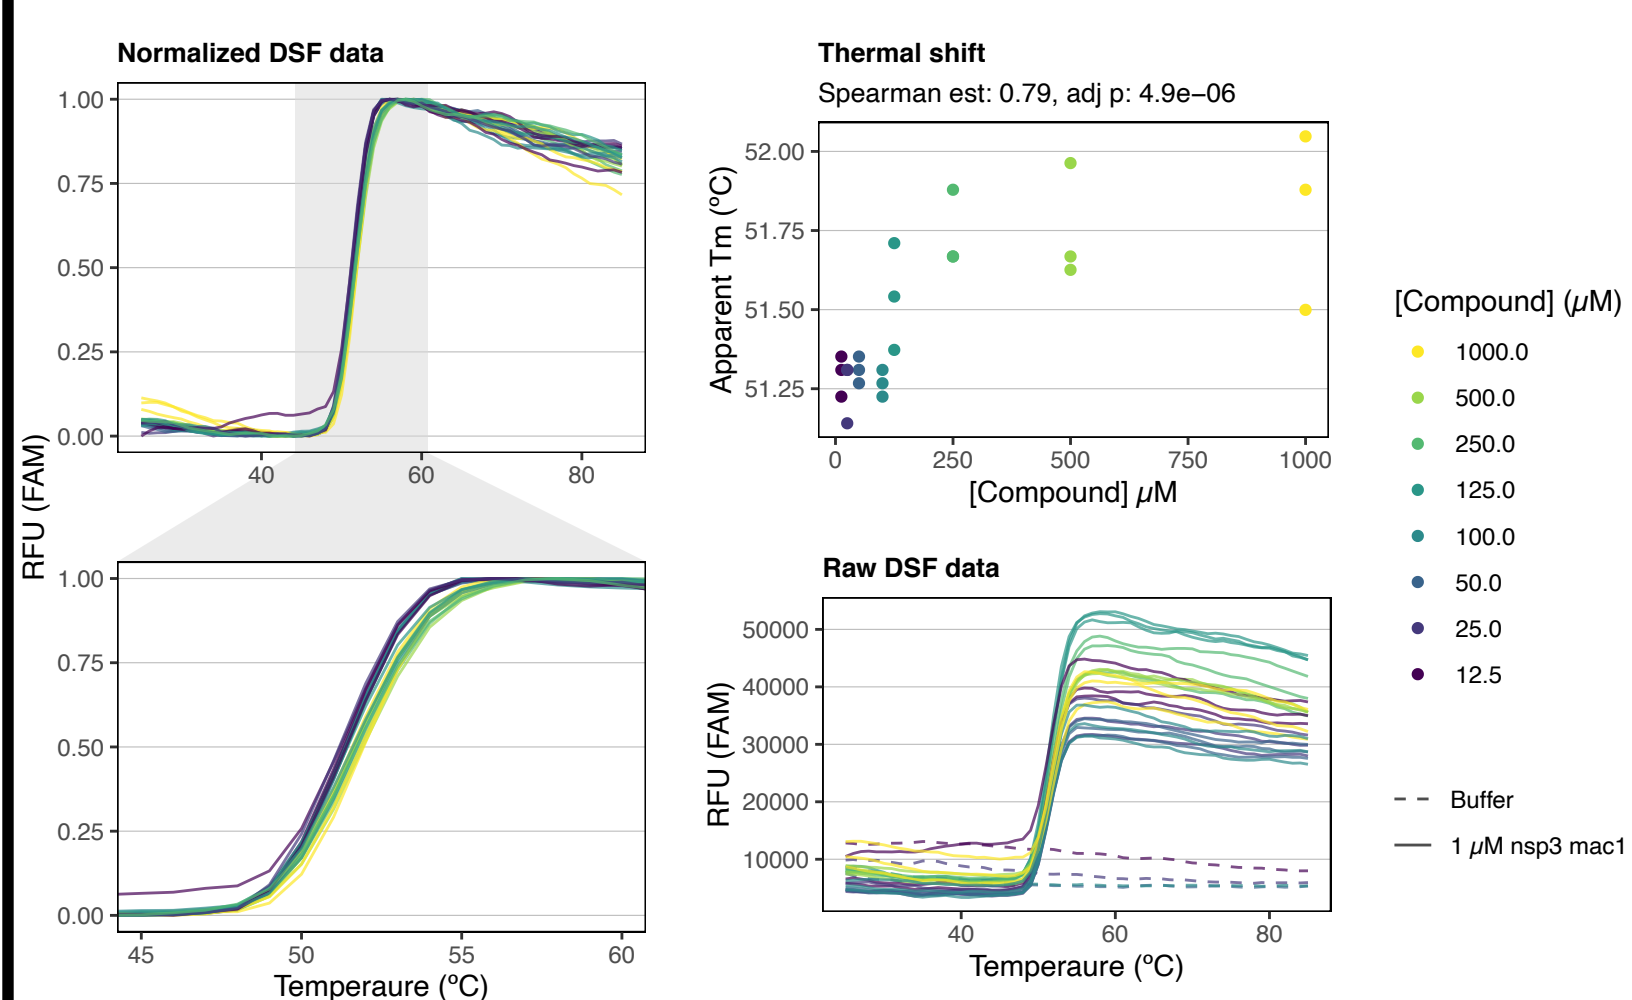

Compound: ZINC000579359572 (a.k.a. ZINC000579359572) | Library: Make-on-demand

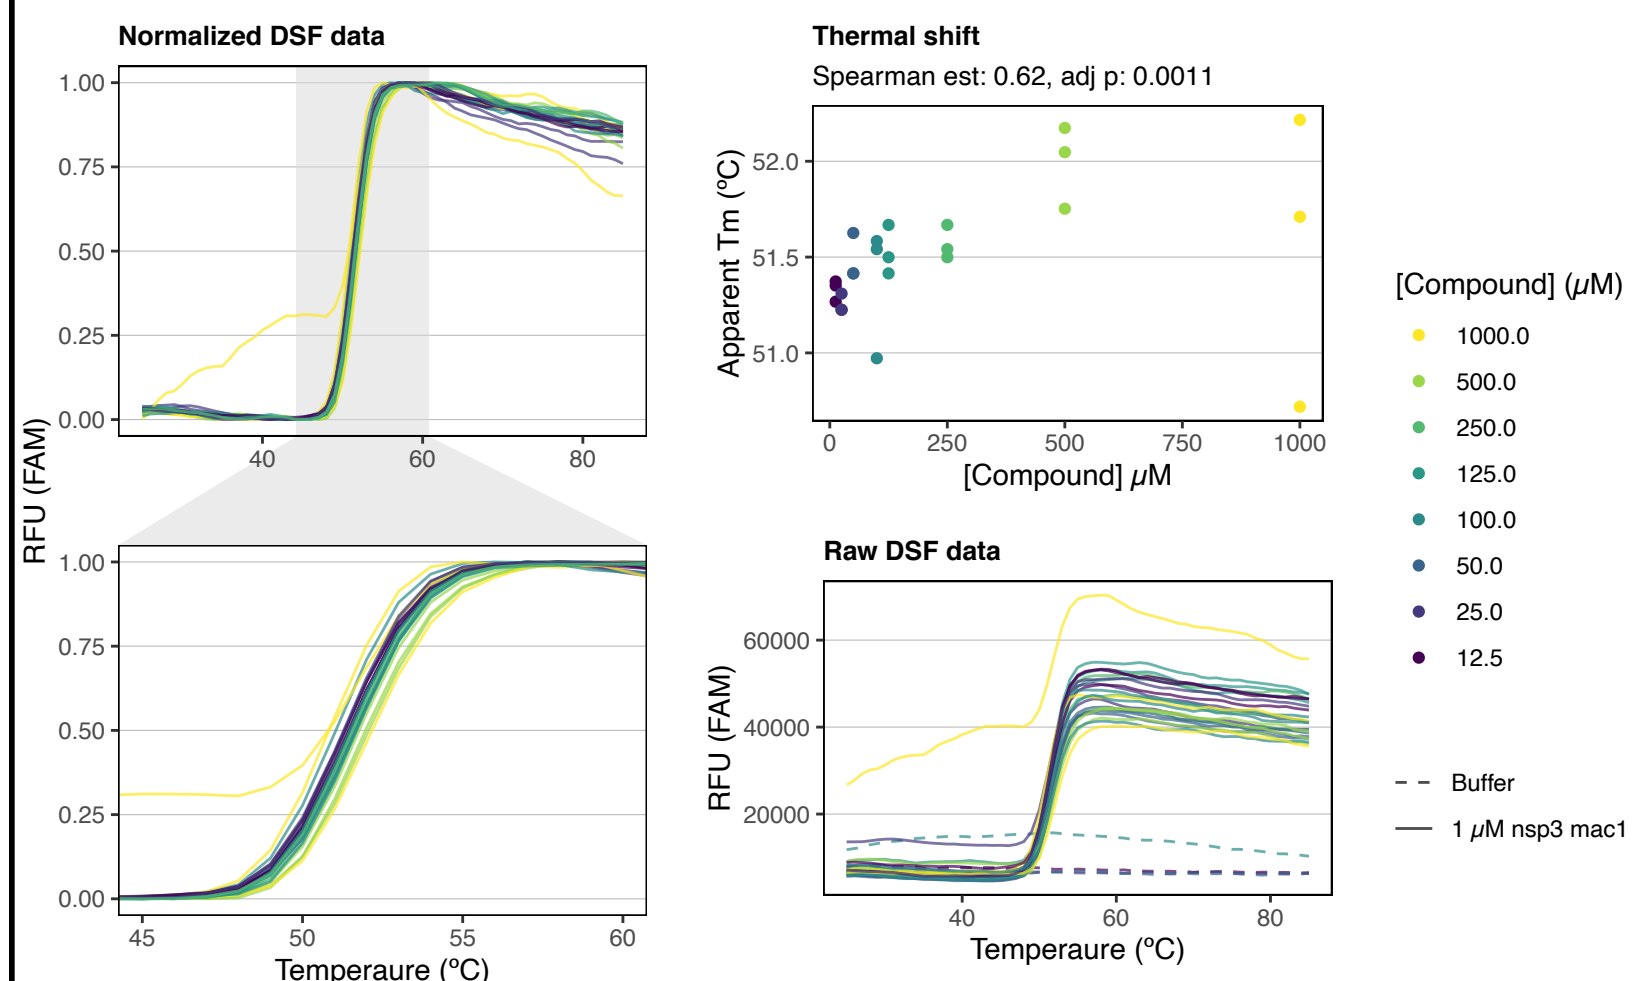

Compound: ZINC000641881628 (a.k.a. ZINC000641881628) | Library: Make-on-demand

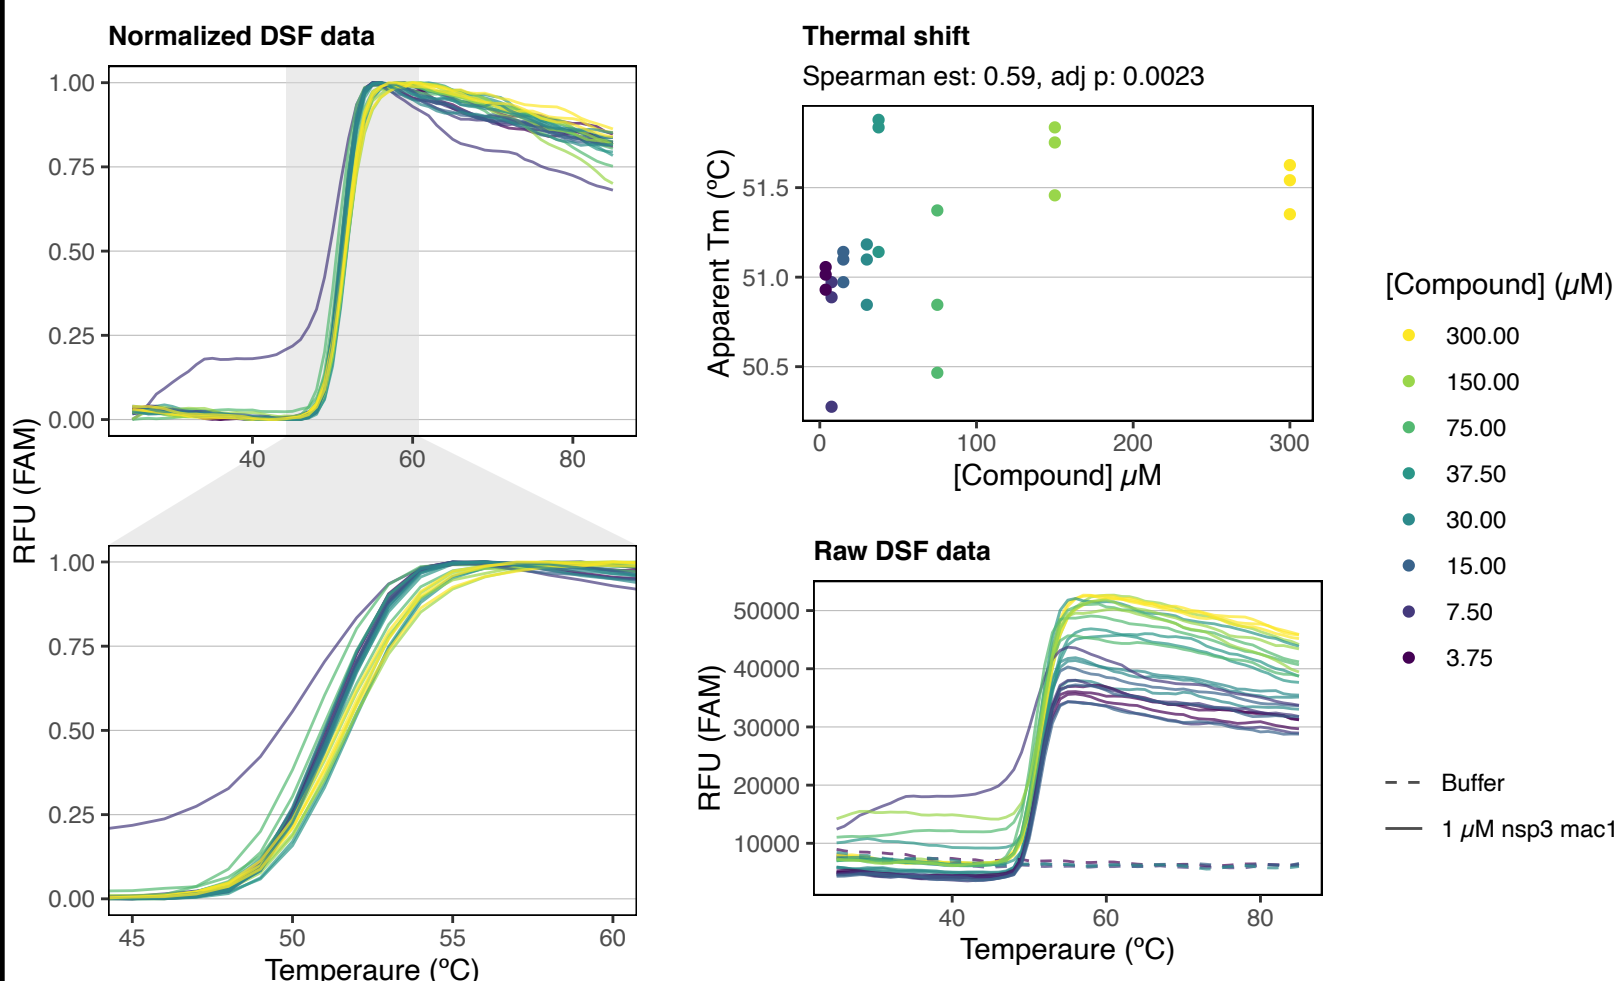

Compound: ZINC000642067873 (a.k.a. ZINC000642067873) | Library: Make-on-demand

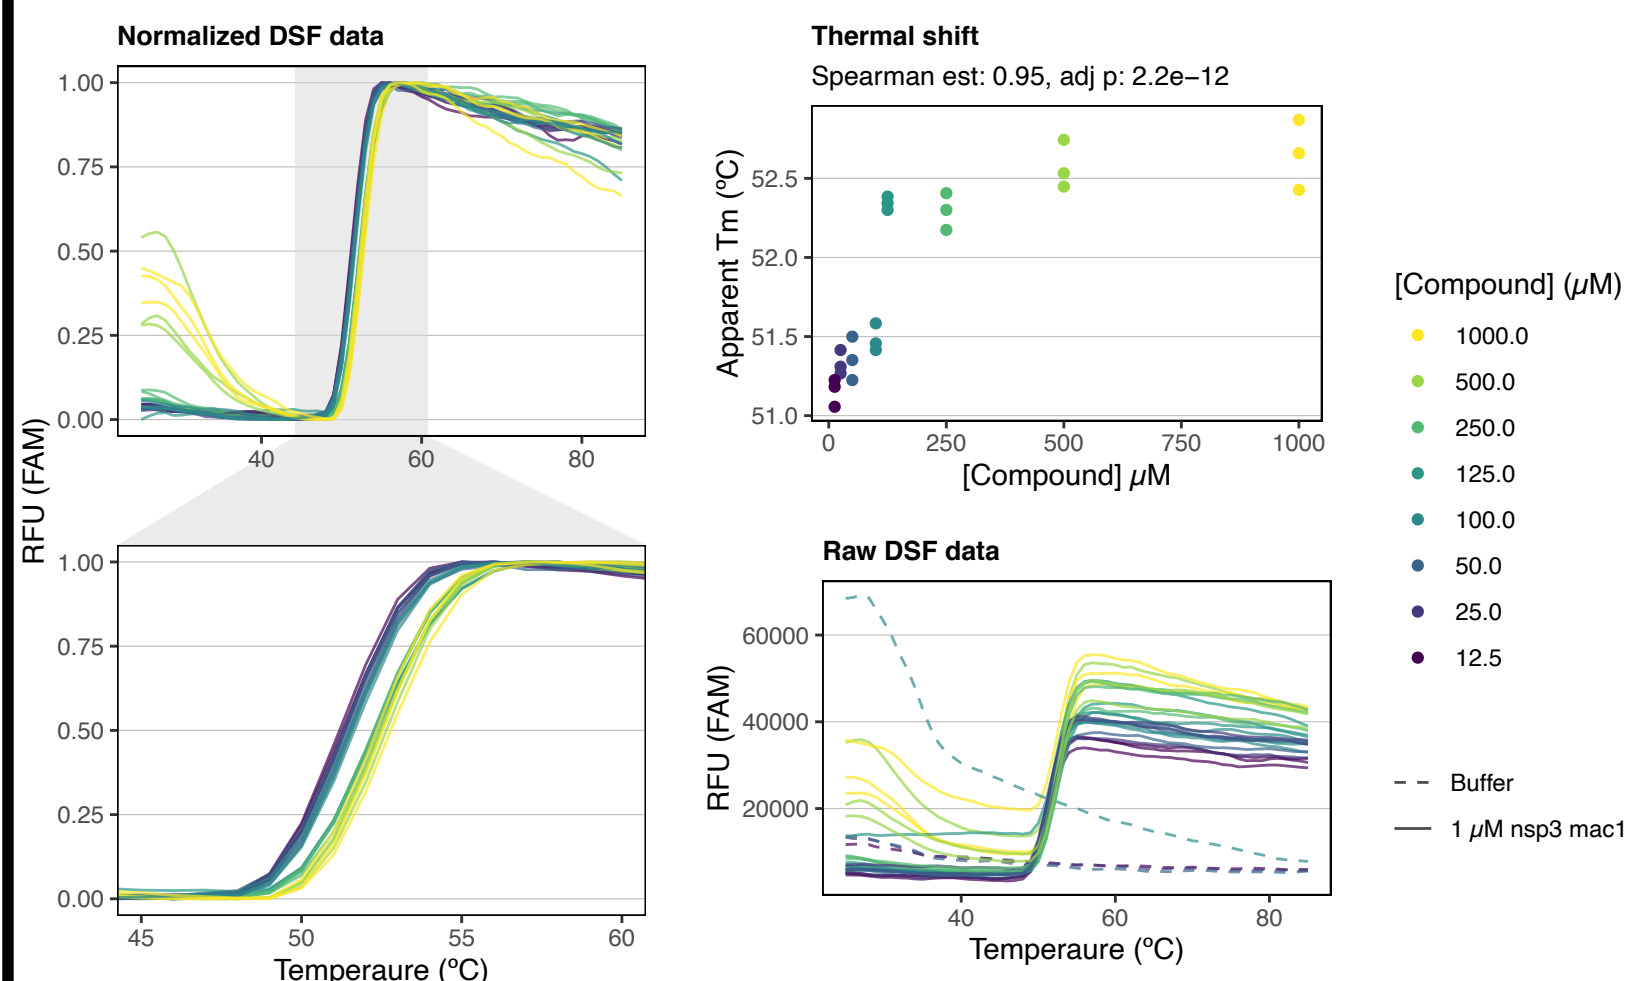

Compound: ZINC000649348648 (a.k.a. ZINC000649348648) | Library: Make-on-demand

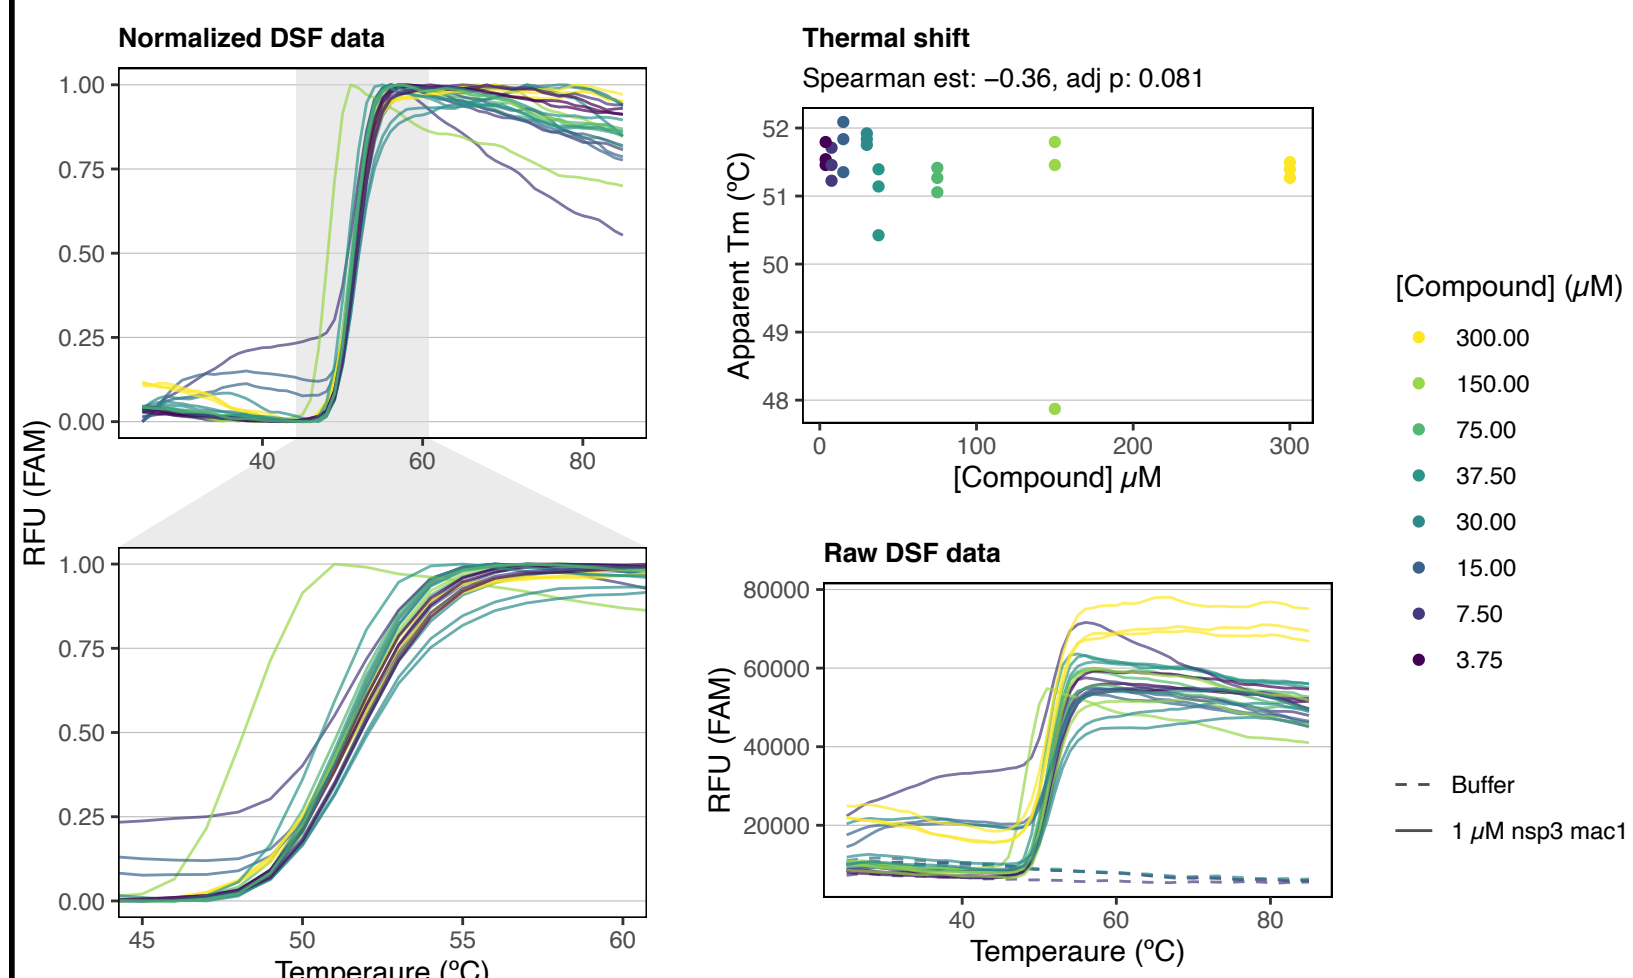

Compound: ZINC000664632051 (a.k.a. ZINC000664632051) | Library: Make-on-demand

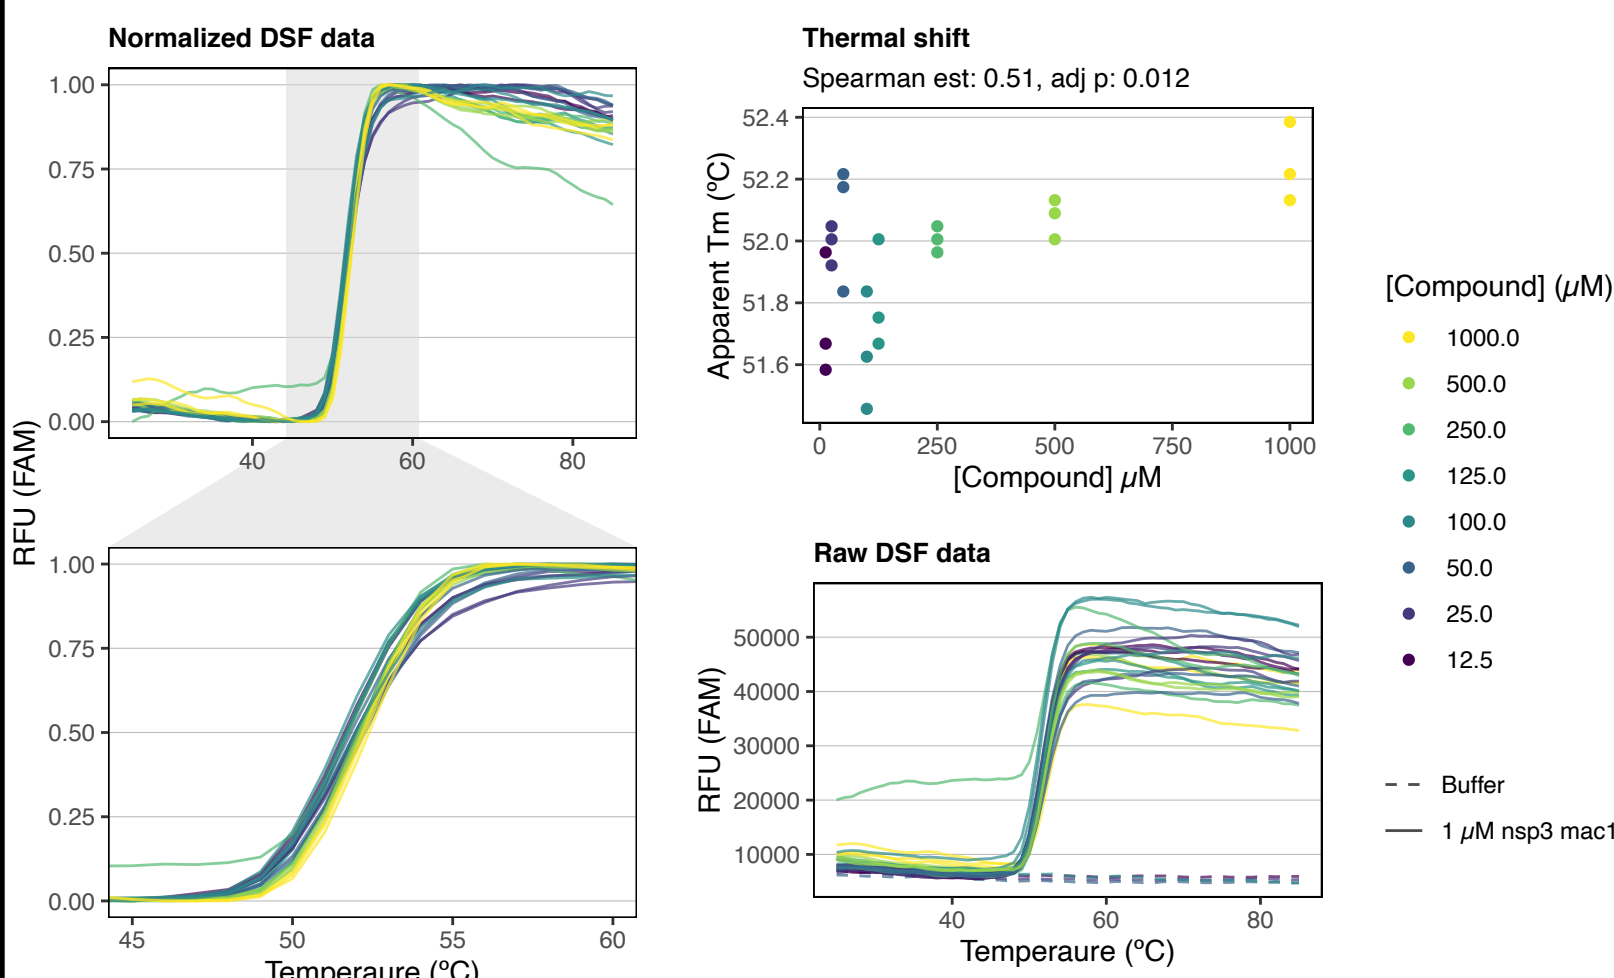

Compound: ZINC000679635167 (a.k.a. ZINC000679635167) | Library: Make-on-demand

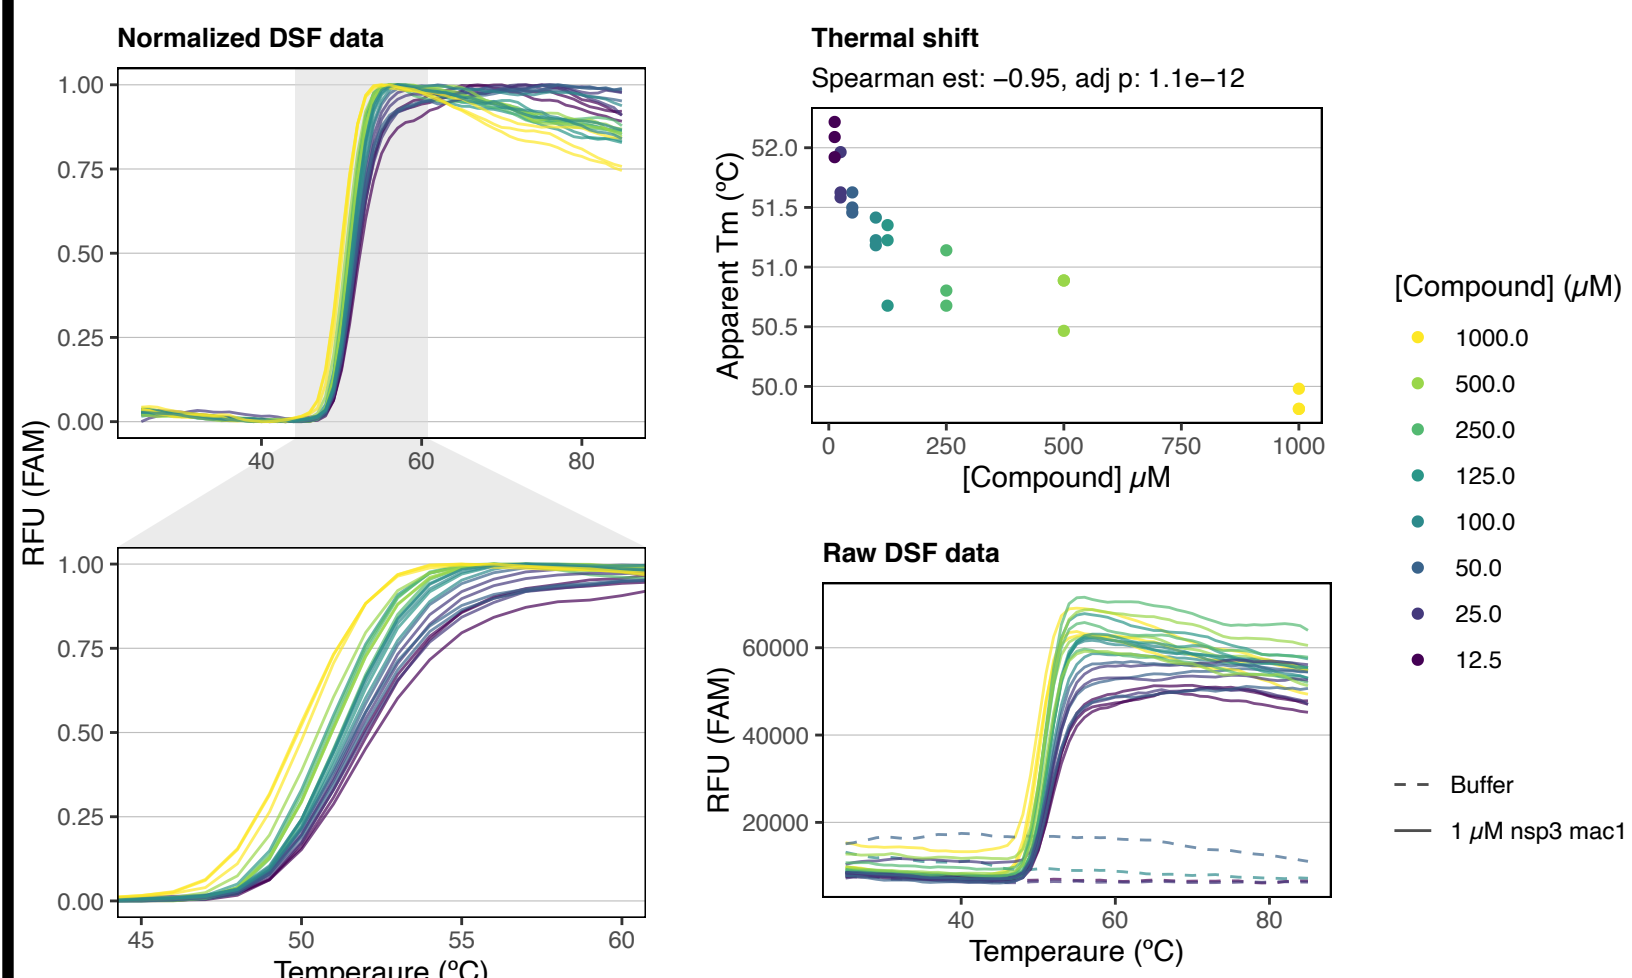

Compound: ZINC000681764827 (a.k.a. ZINC000681764827) | Library: Make-on-demand

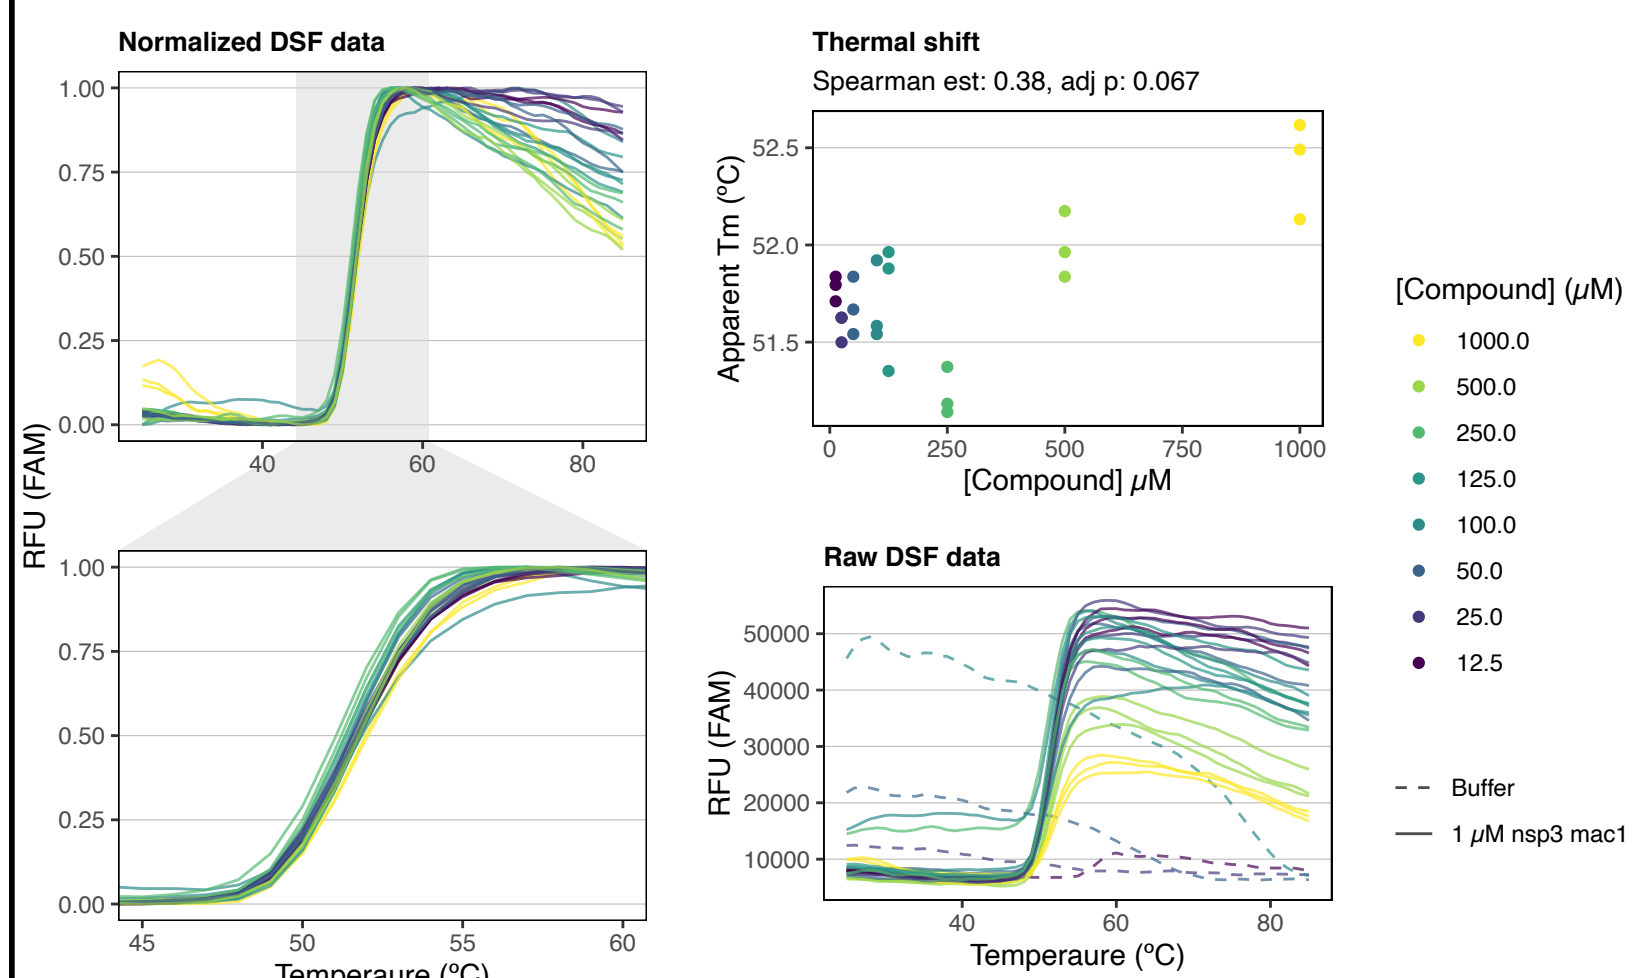

Compound: ZINC000733430132 (a.k.a. ZINC000733430132) | Library: Make-on-demand

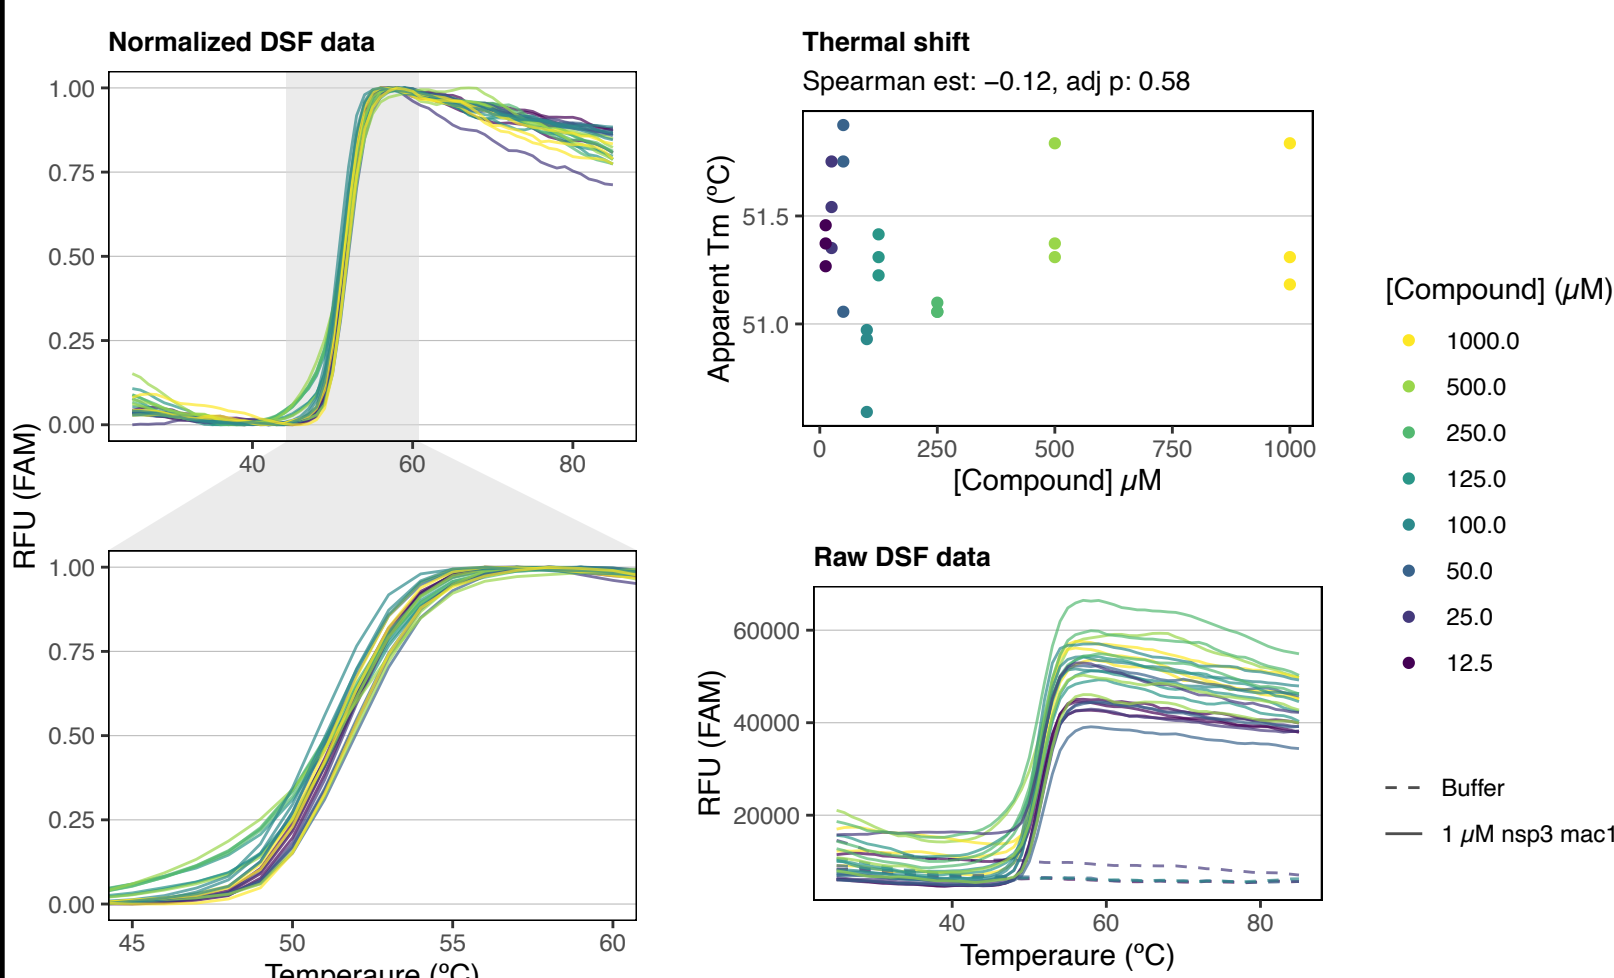

Compound: ZINC000745413896 (a.k.a. ZINC000745413896) | Library: Make-on-demand

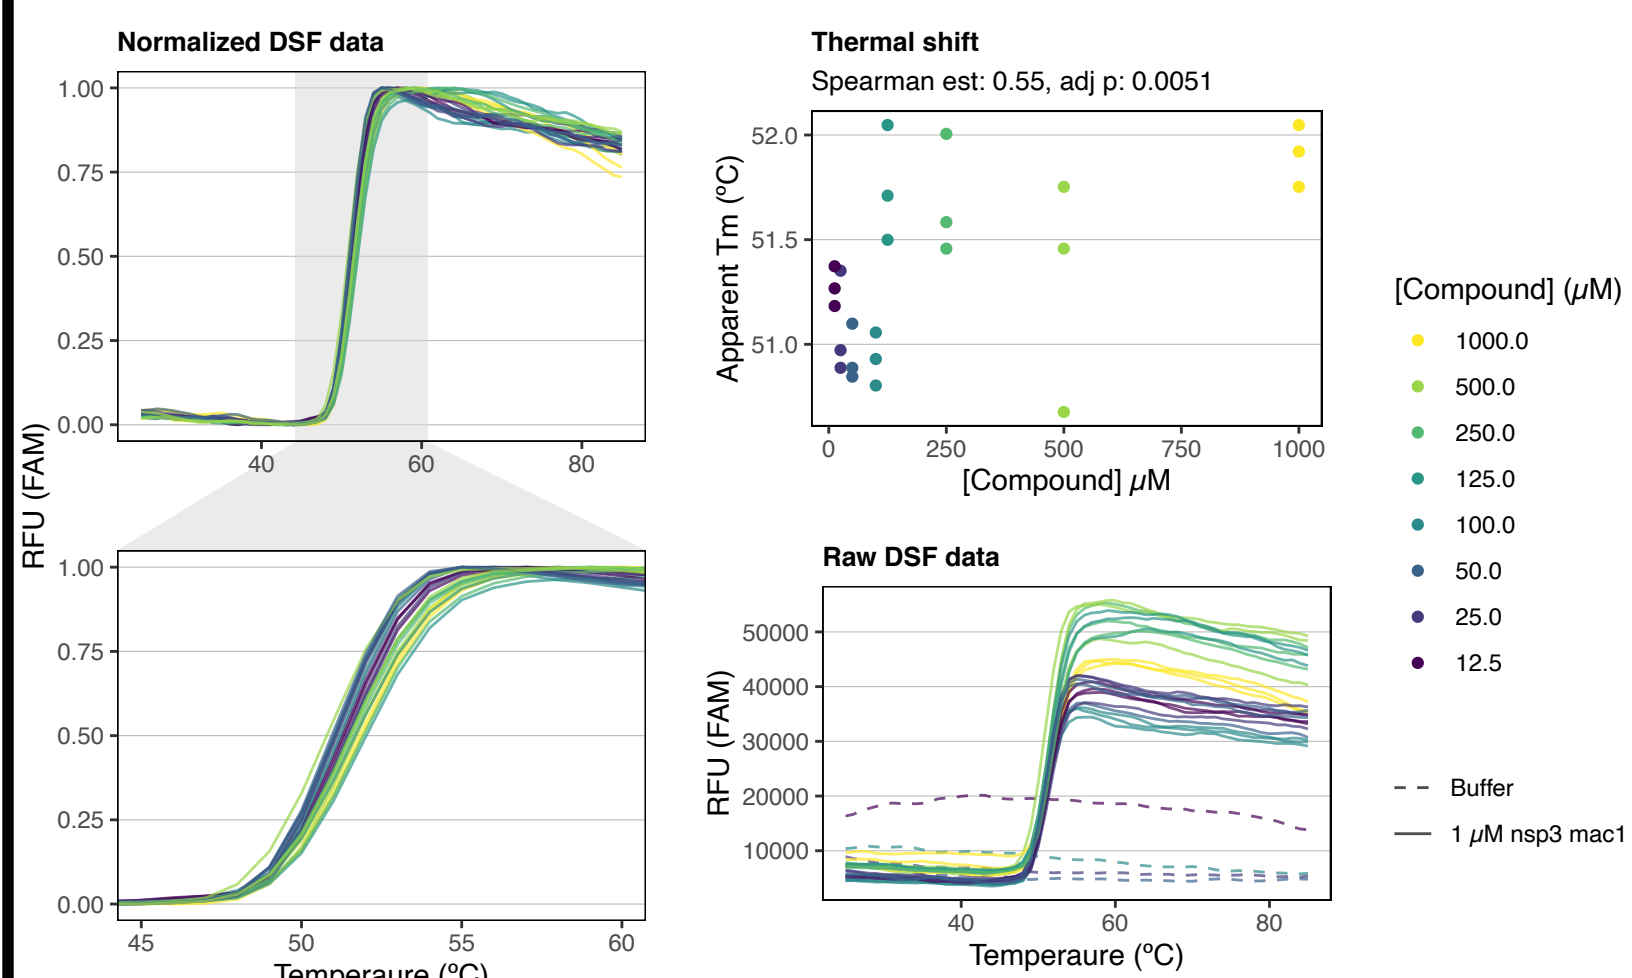

Compound: ZINC000772152995 (a.k.a. ZINC000772152995) | Library: Make-on-demand

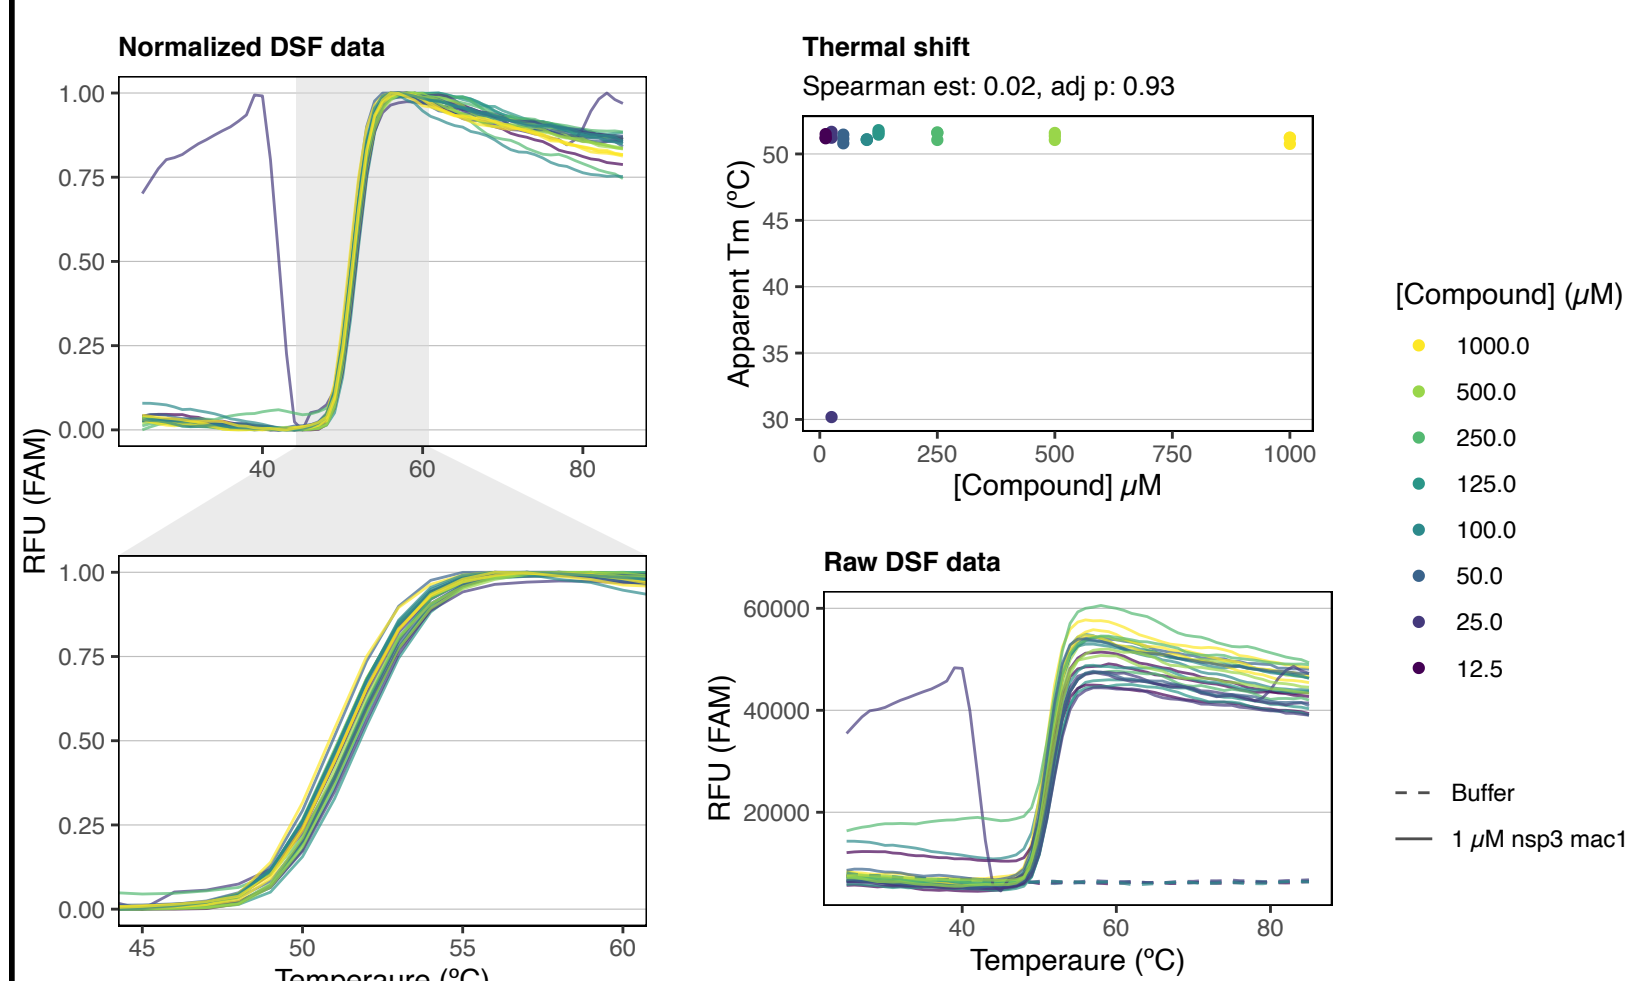

Compound: ZINC000773730329 (a.k.a. ZINC000773730329) | Library: Make-on-demand

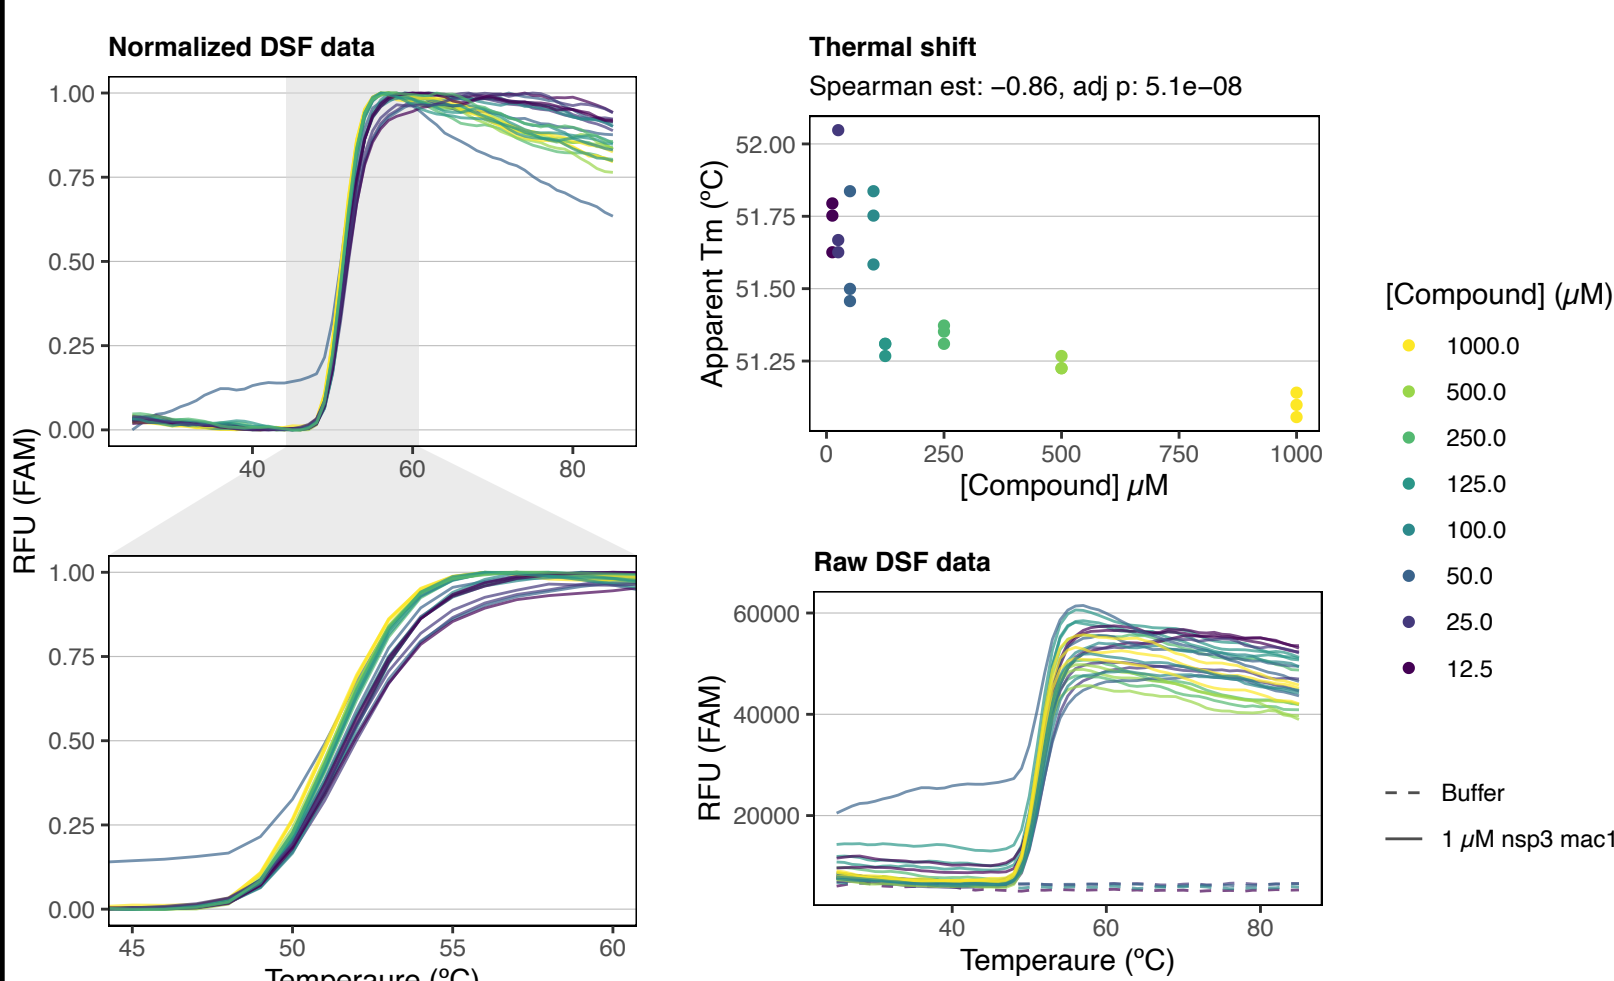

Compound: ZINC000779122380 (a.k.a. ZINC000779122380) | Library: Make-on-demand

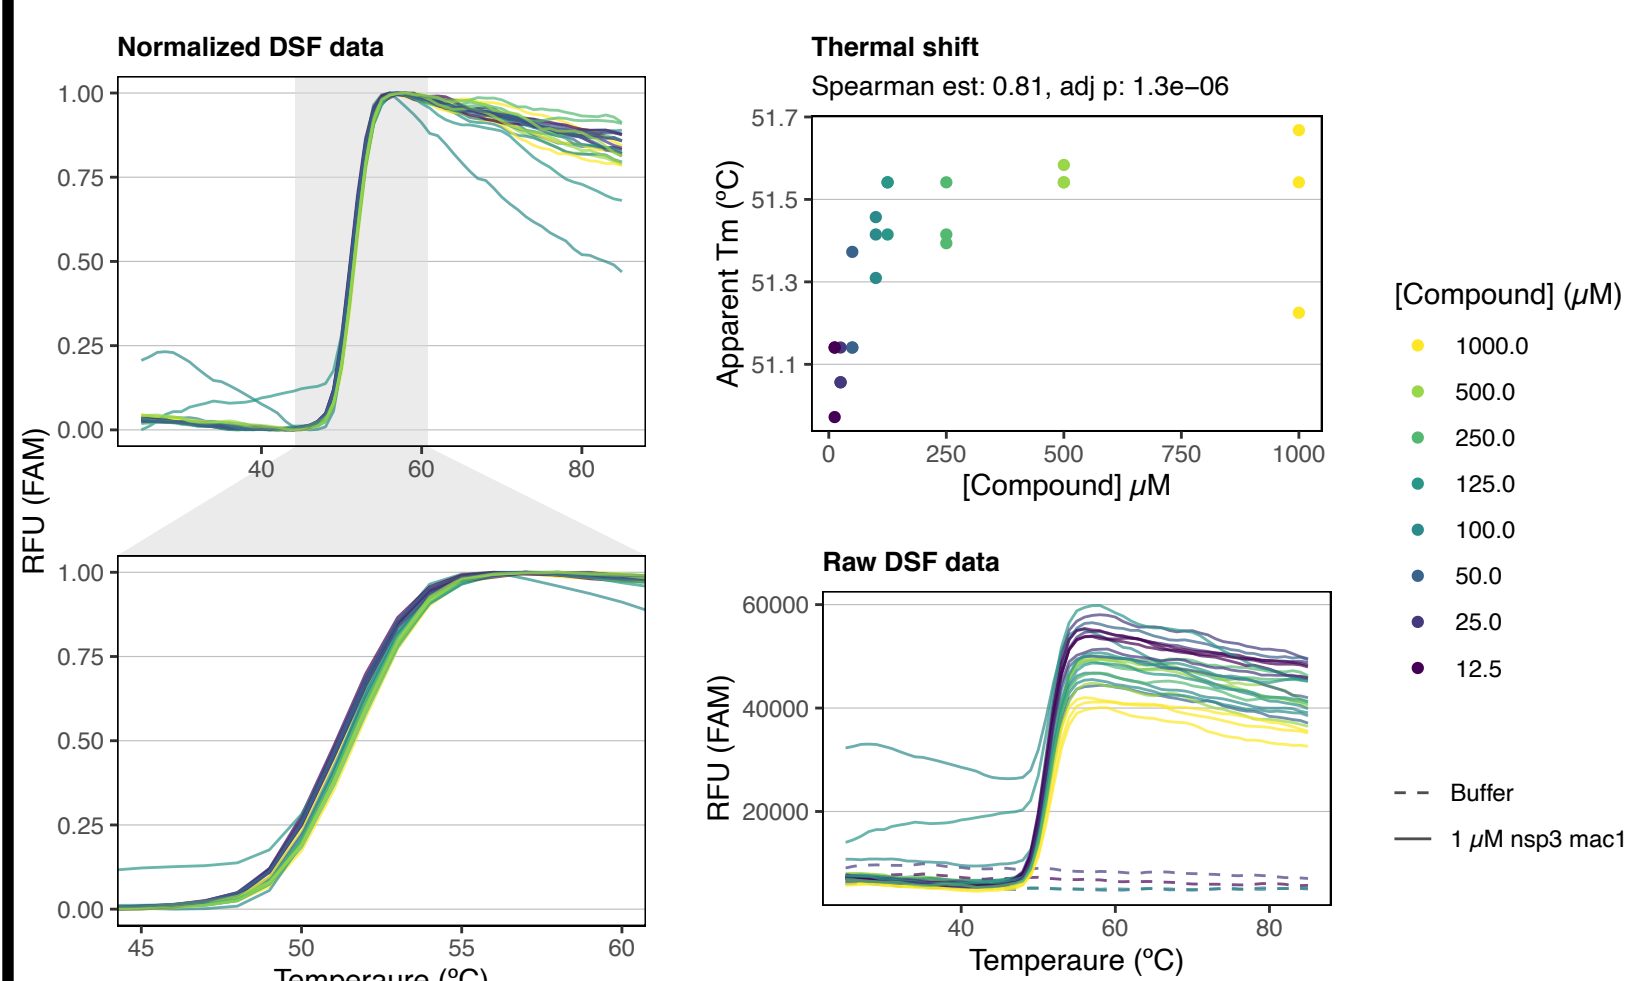

Compound: ZINC000798346395 (a.k.a. ZINC000798346395) | Library: Make-on-demand

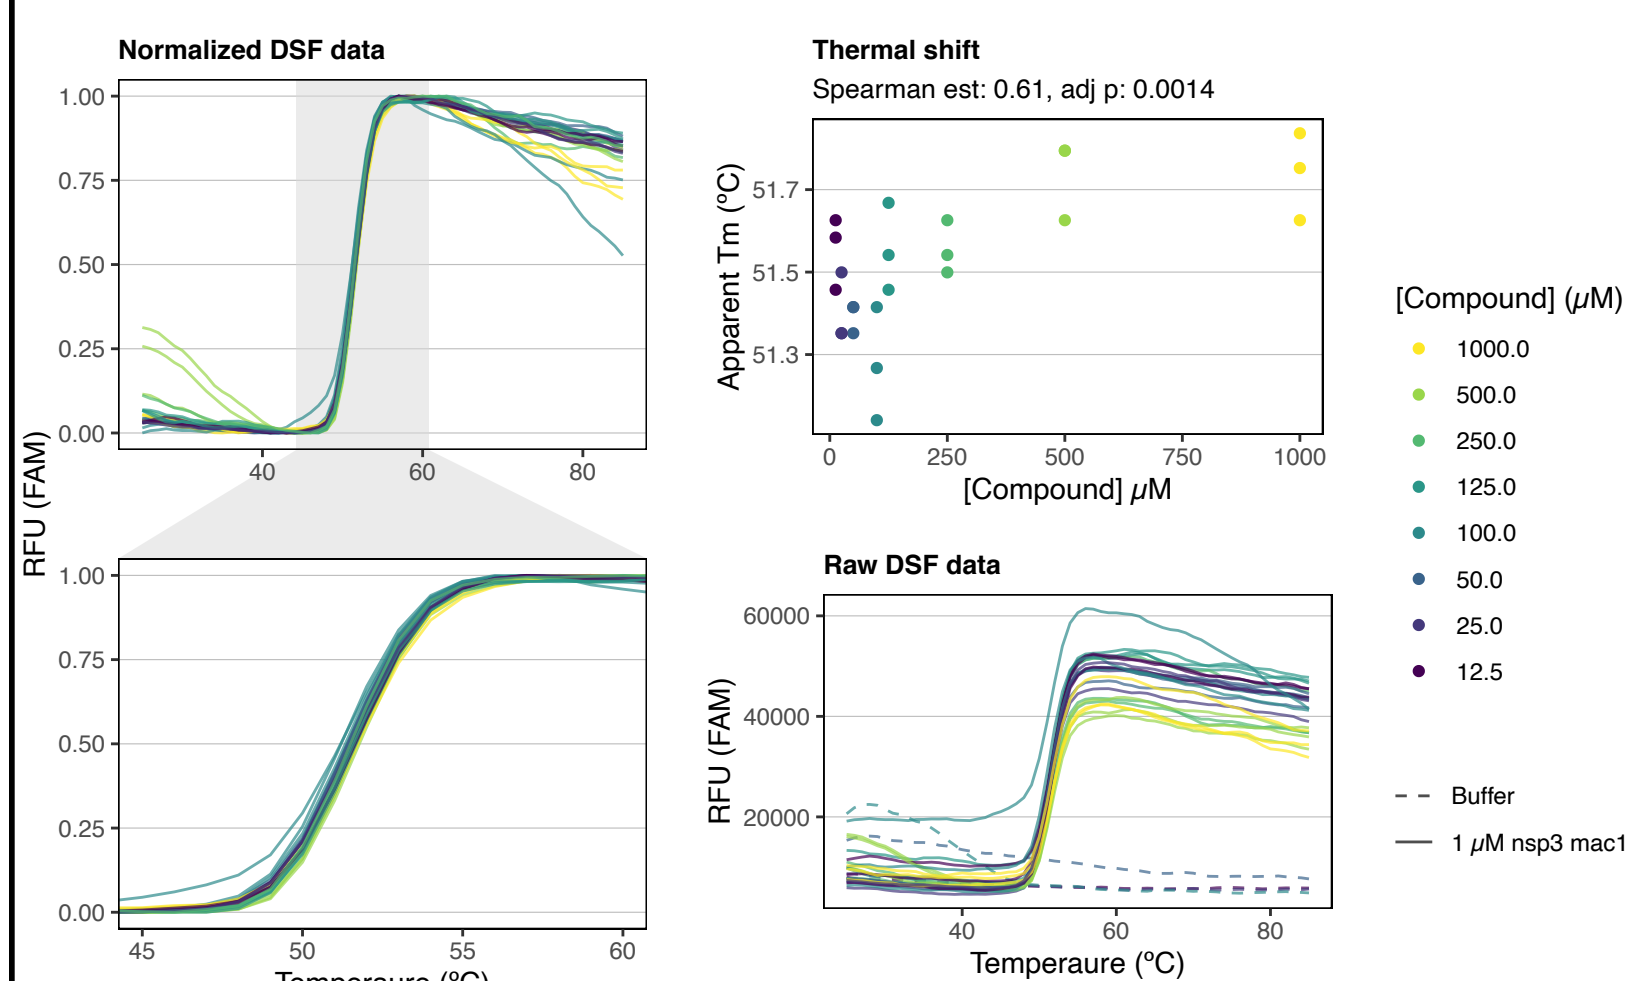

Compound: ZINC000820965086 (a.k.a. ZINC000820965086) | Library: Make-on-demand

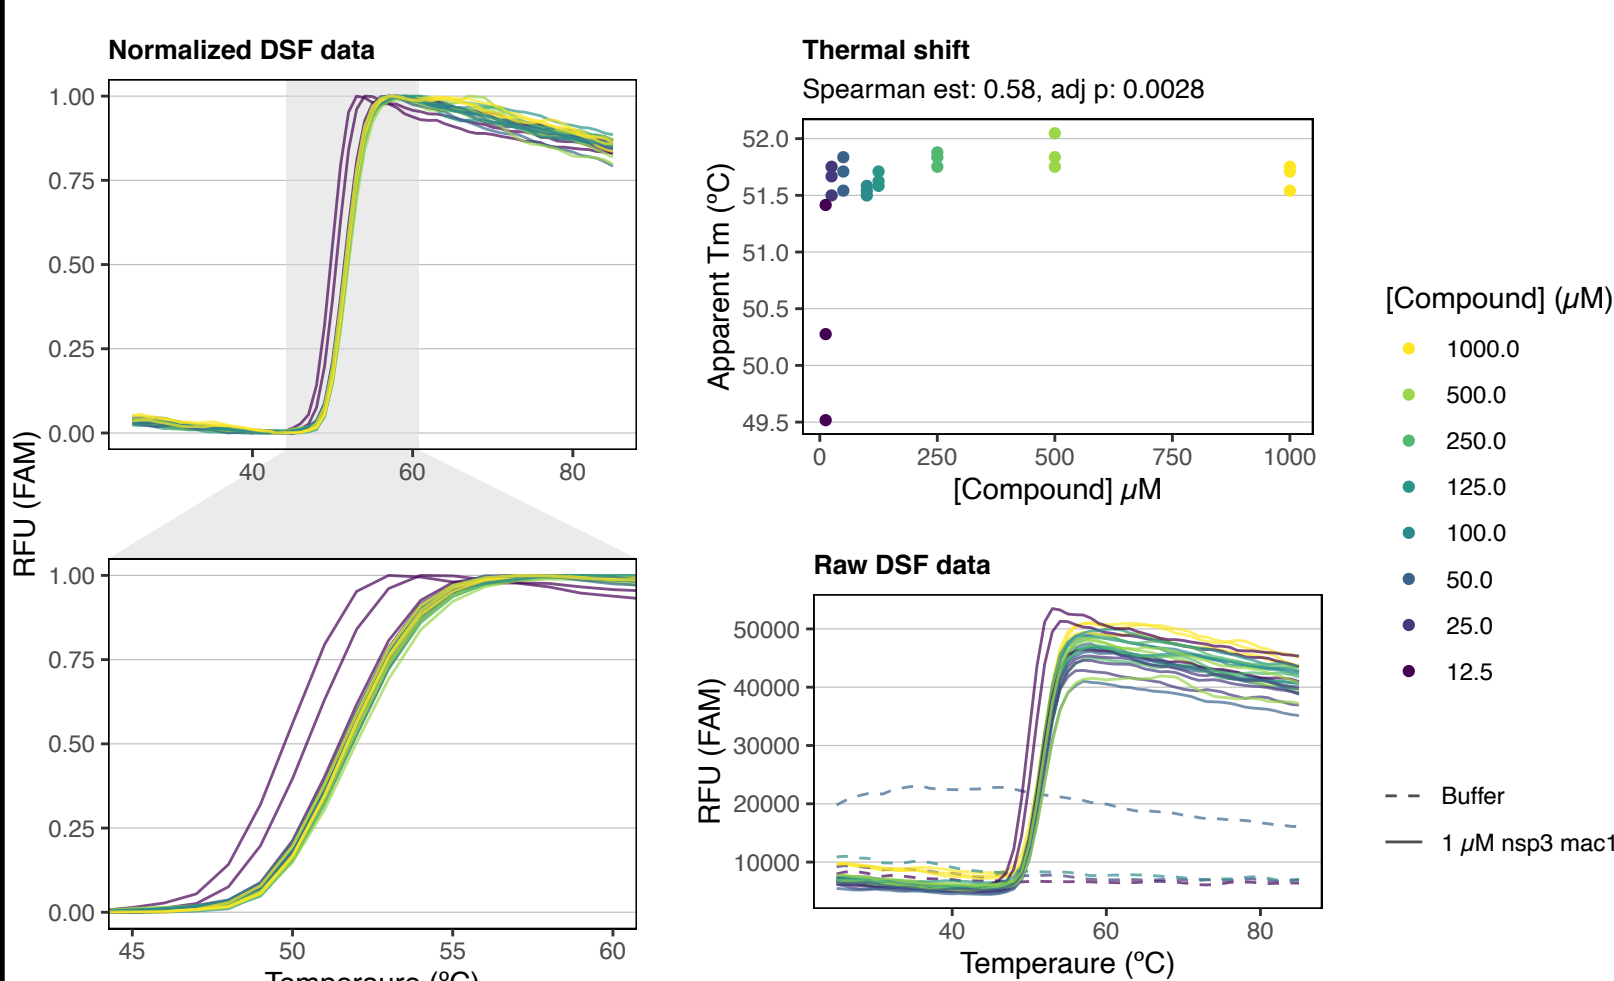

Compound: ZINC000827900828 (a.k.a. ZINC000827900828) | Library: Make-on-demand

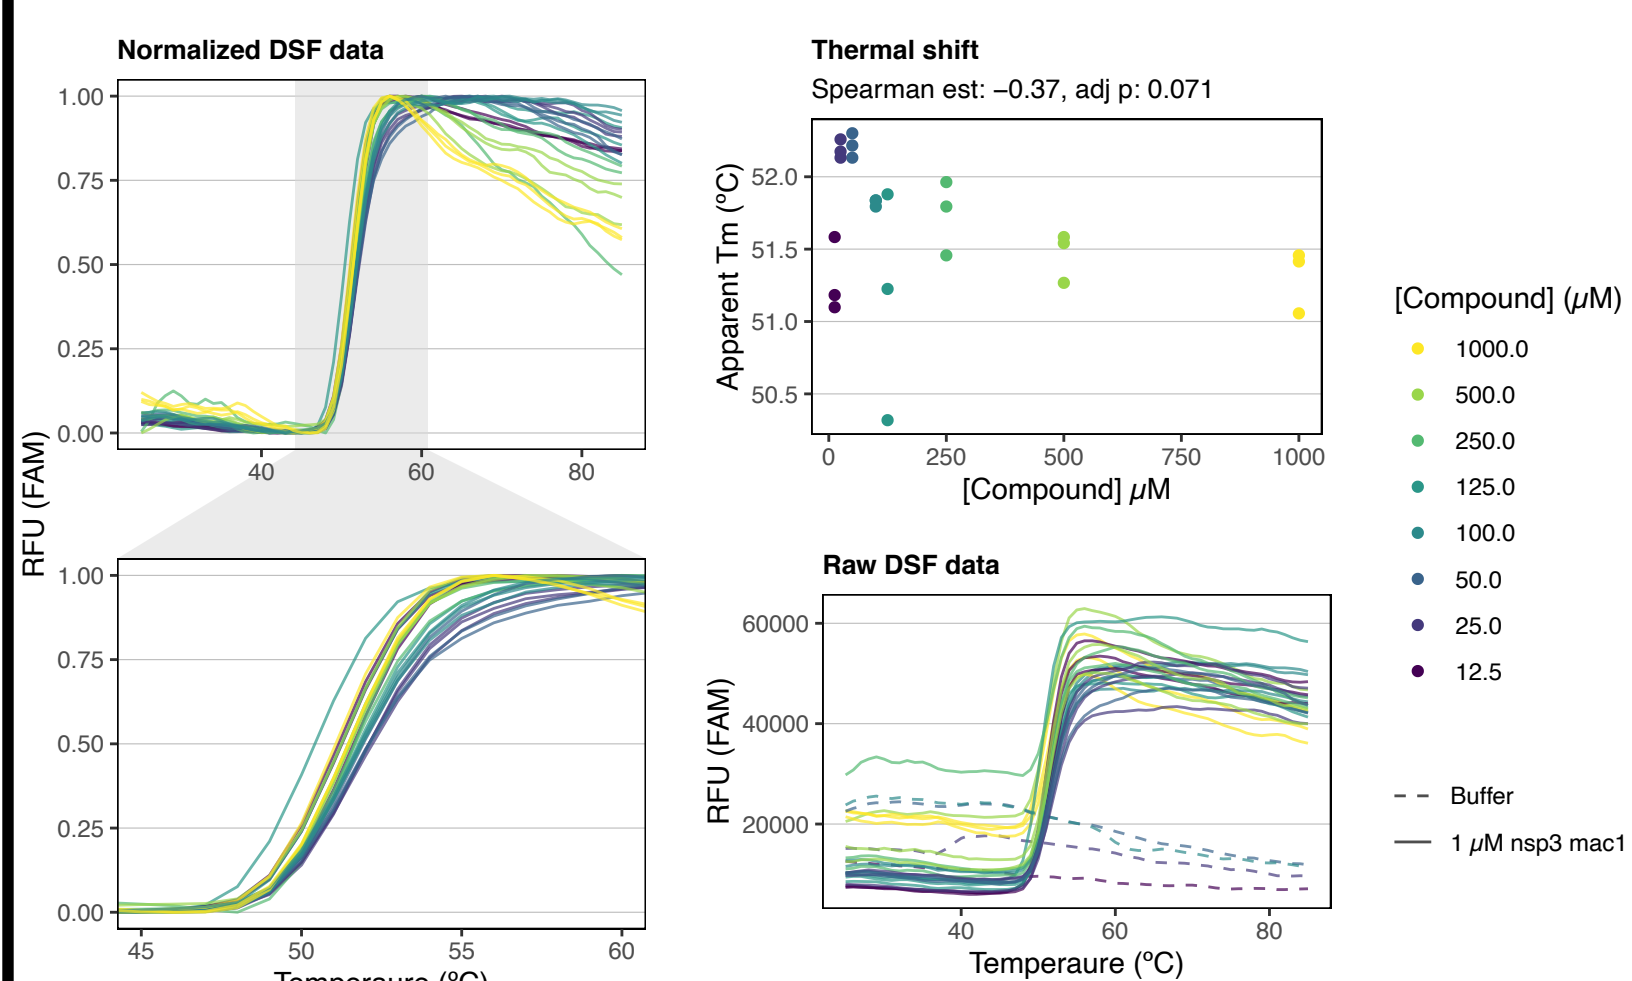

Compound: ZINC000835985505 (a.k.a. ZINC000835985505) | Library: Make-on-demand

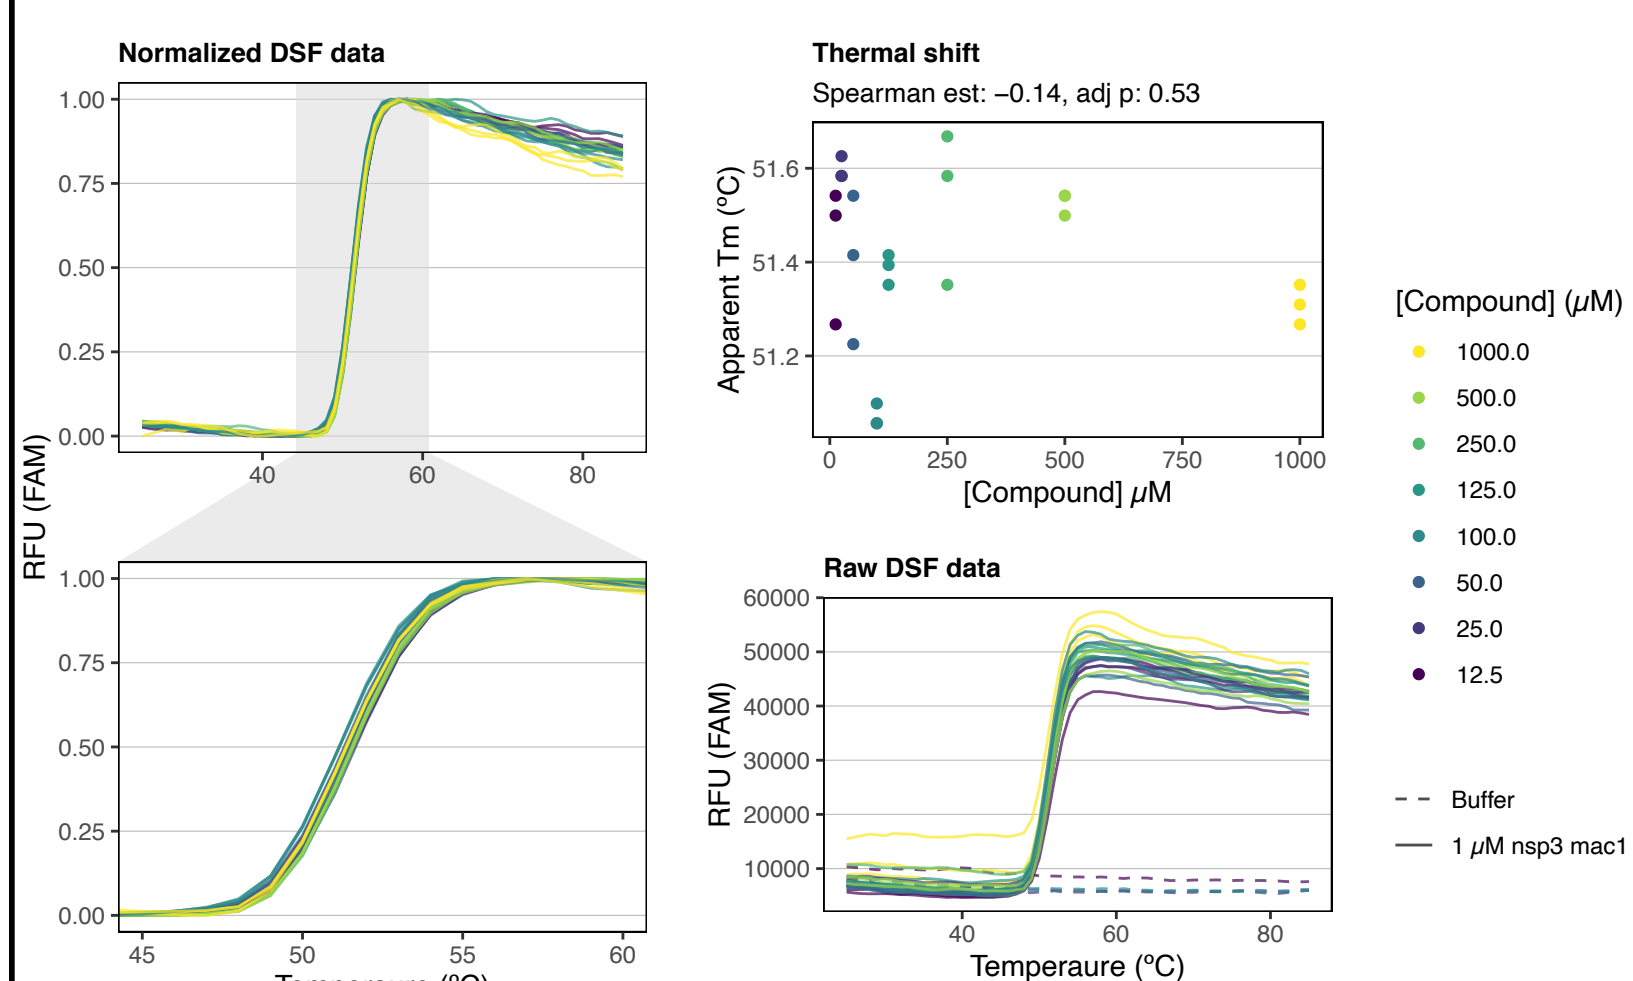

Compound: ZINC000865679550 (a.k.a. ZINC000865679550) | Library: Make-on-demand

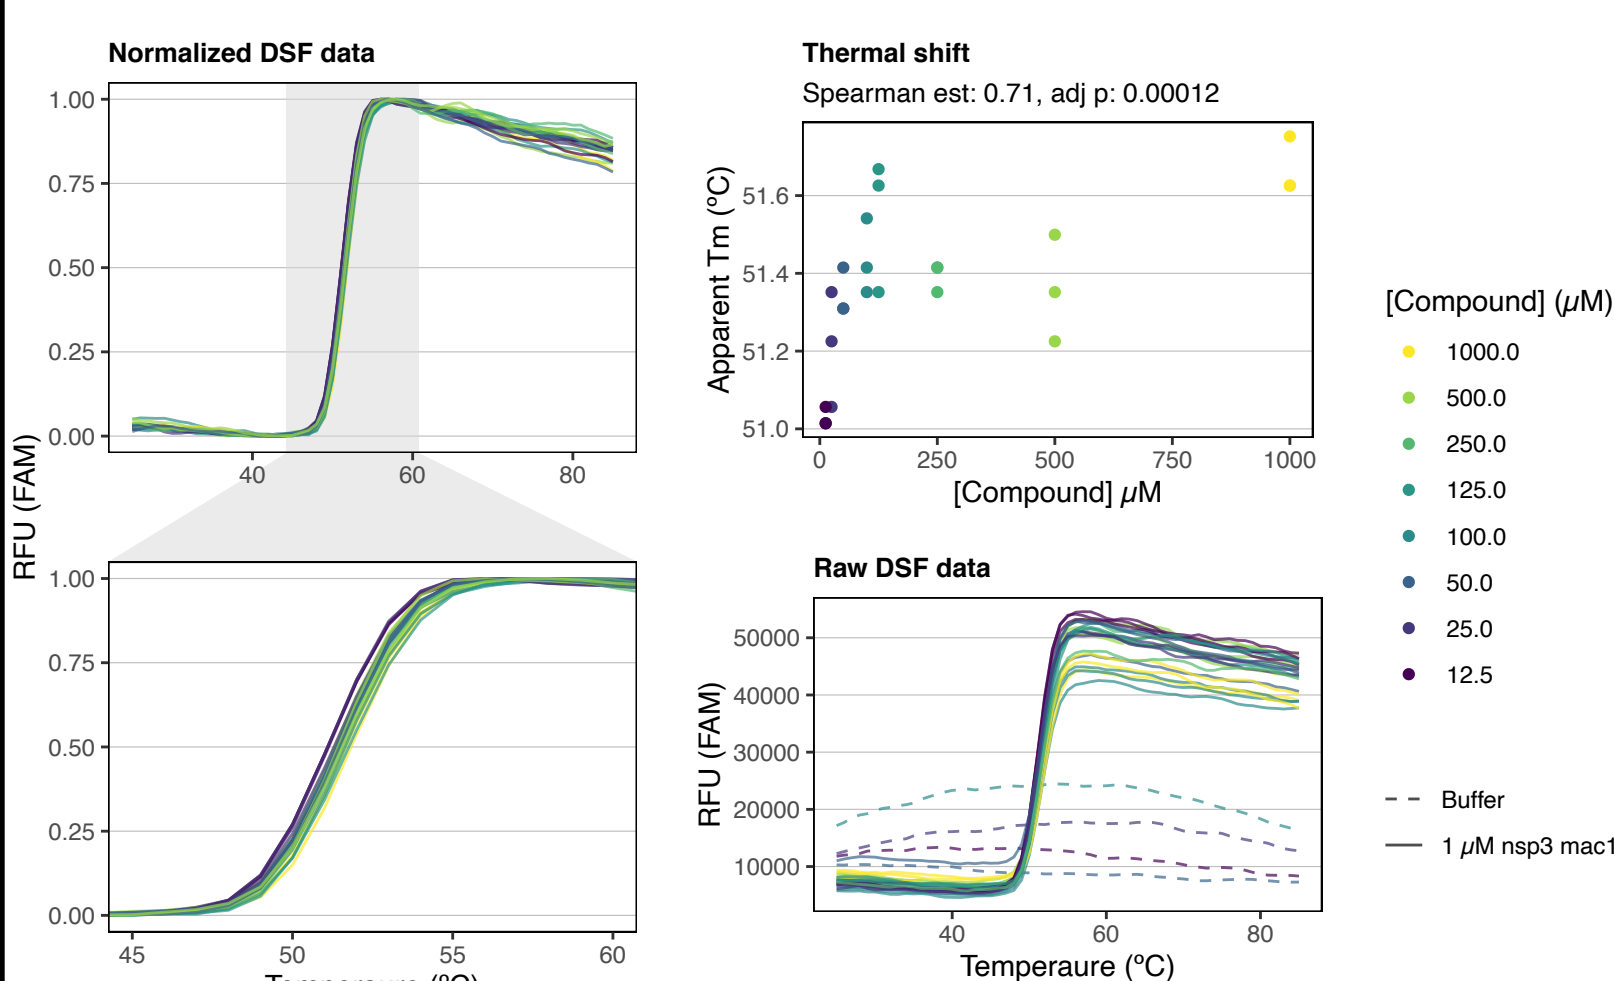

Compound: ZINC000866018680 (a.k.a. ZINC000866018680) | Library: Make-on-demand

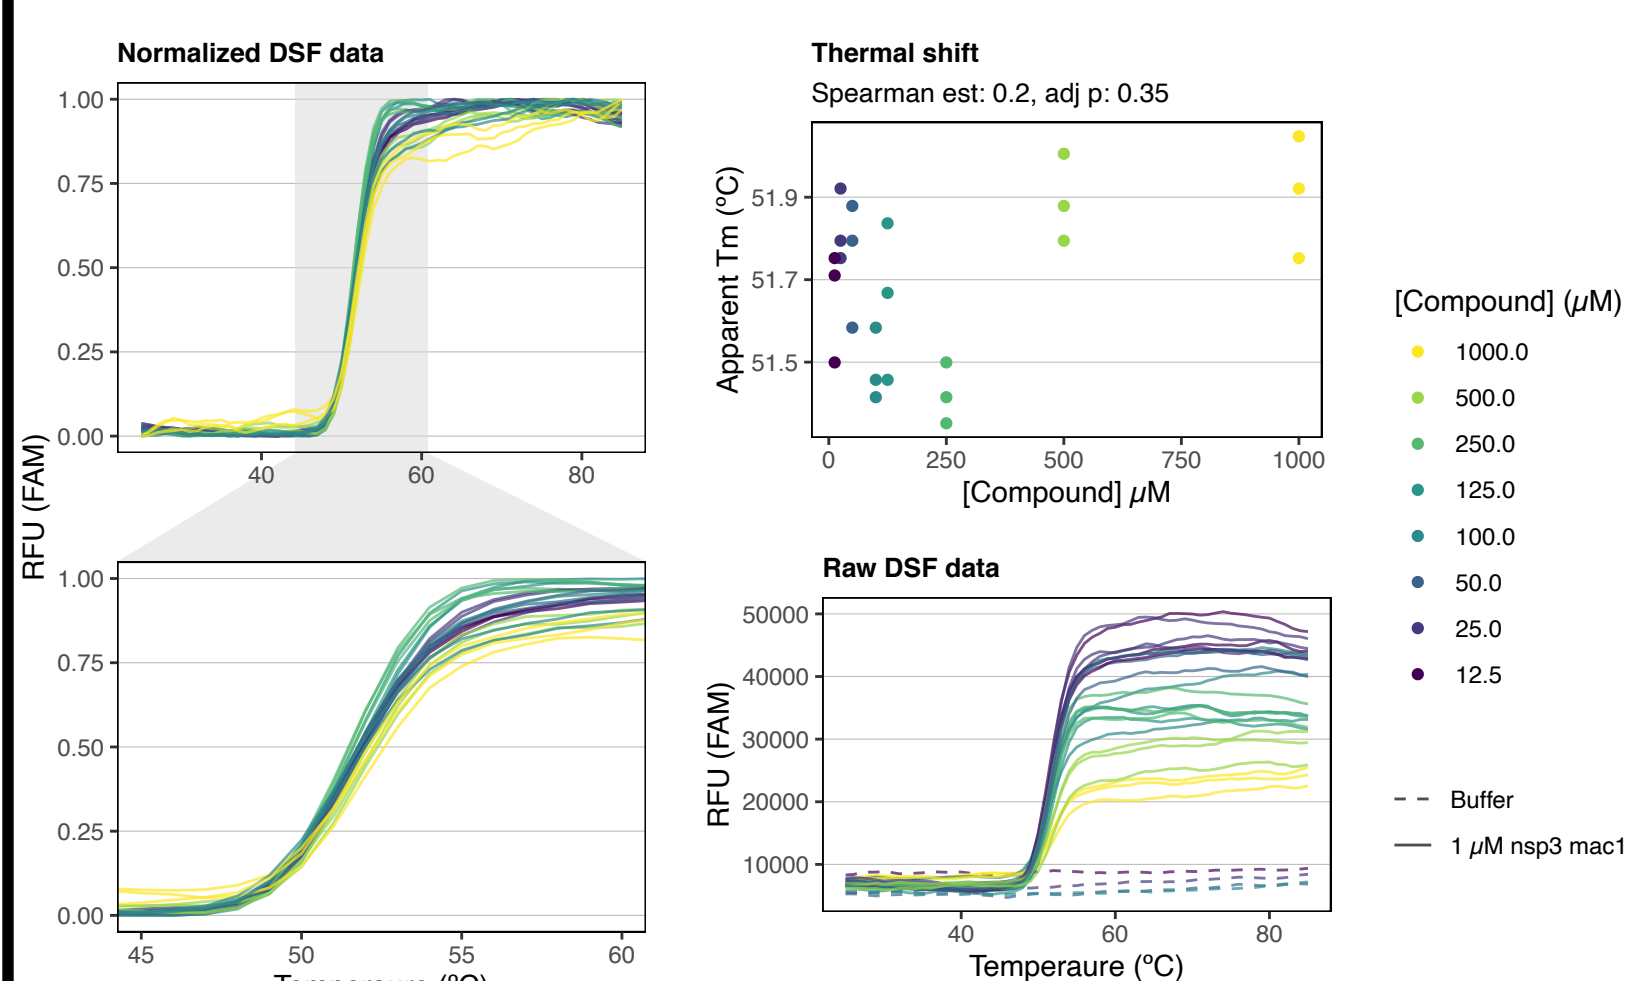

Compound: ZINC000879258074 (a.k.a ZINC000879258074) | Library: Make-on-demand

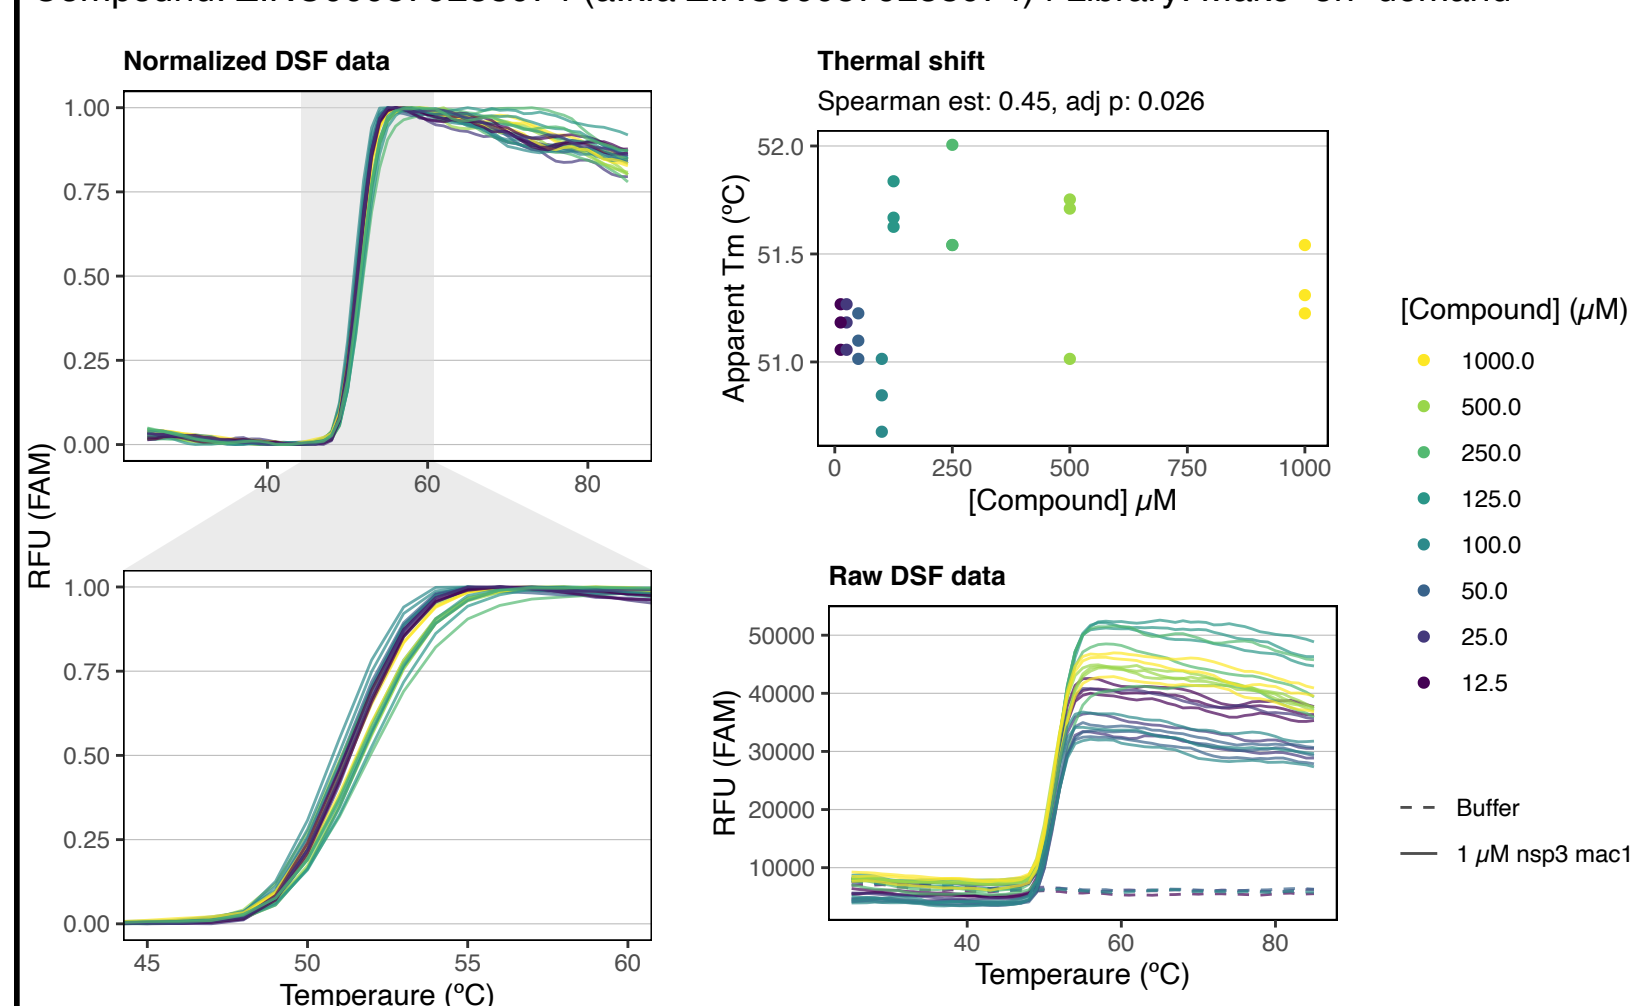

Compound: ZINC000881775356 (a.k.a ZINC000881775356) | Library: Make-on-demand

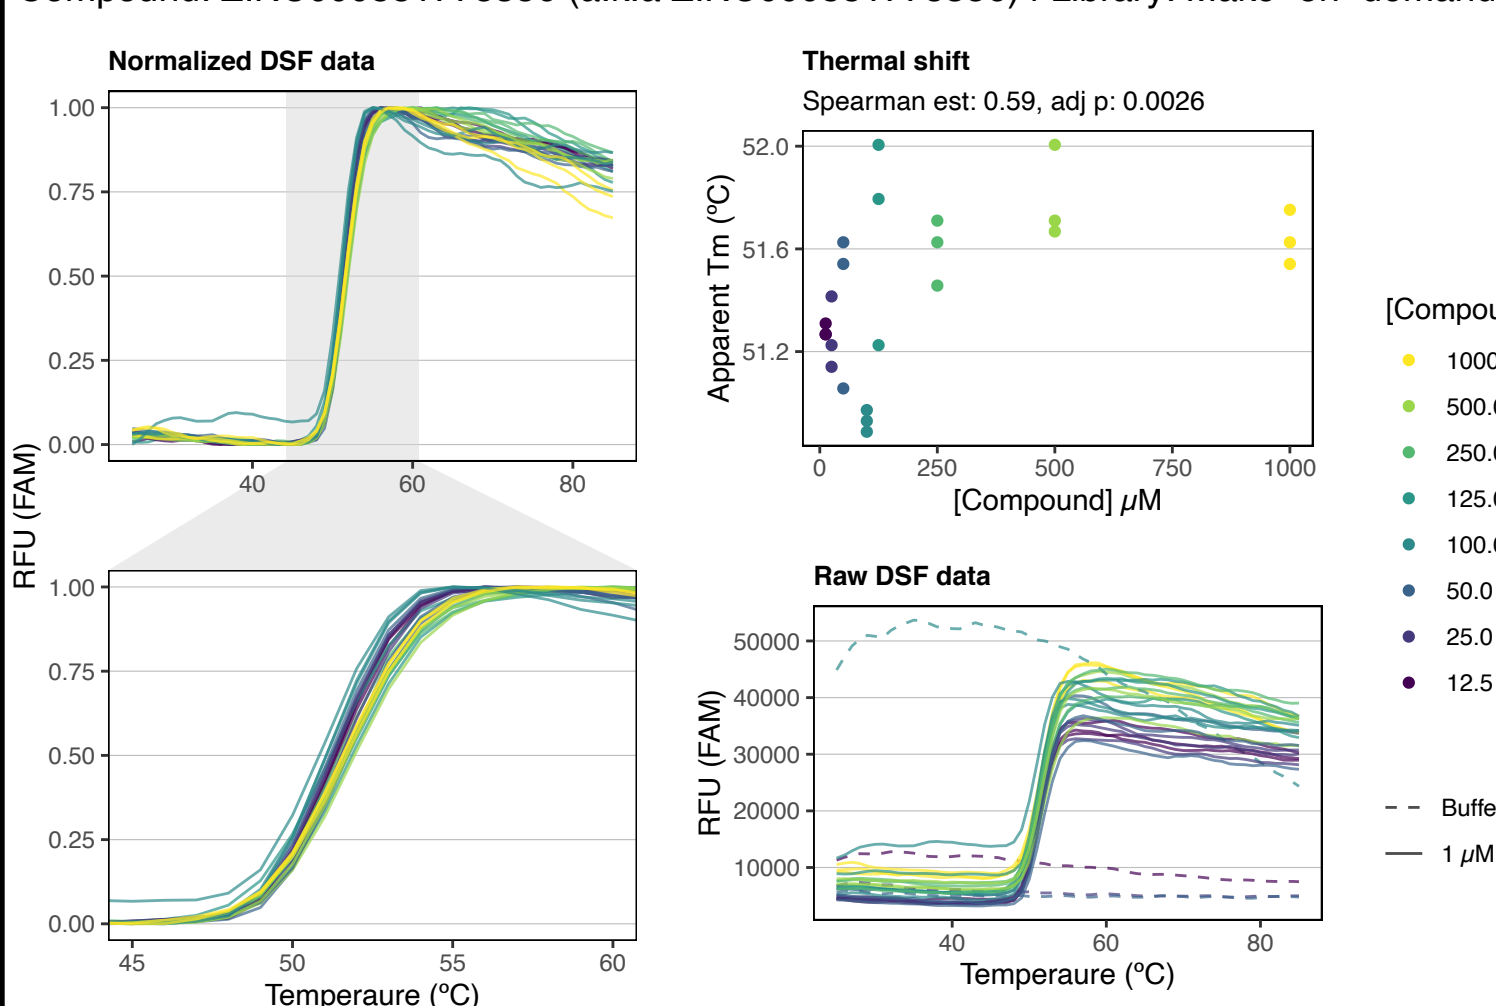

Compound: ZINC000882897665 (a.k.a ZINC000882897665) | Library: Make-on-demand

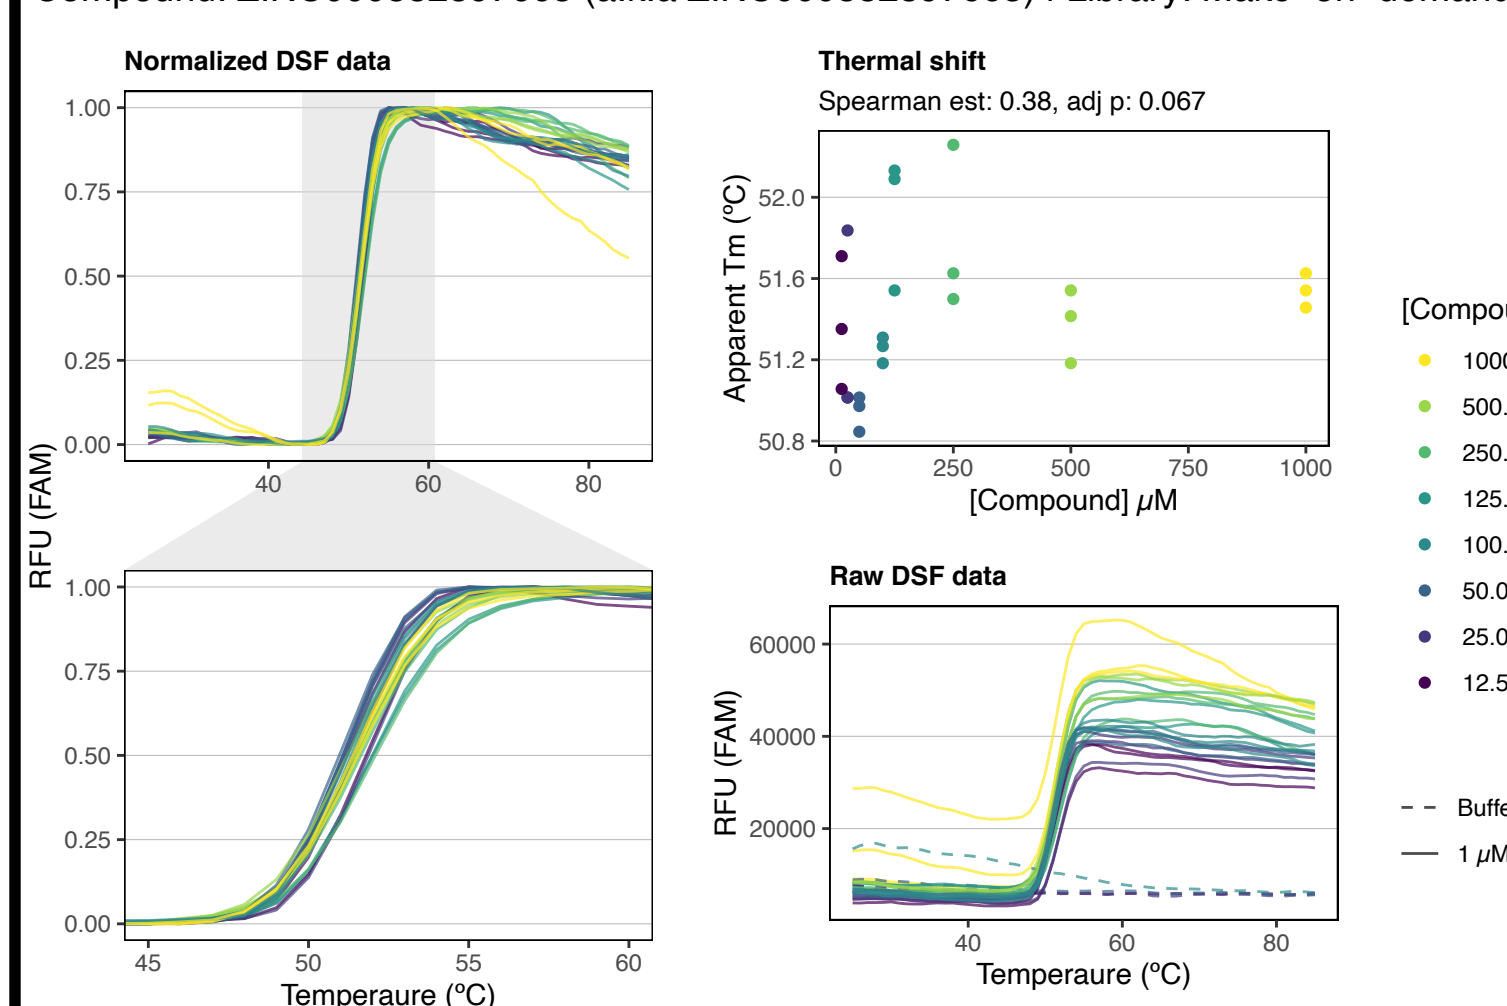

Compound: ZINC000882897766 (a.k.a ZINC000882897766) | Library: Make-on-demand

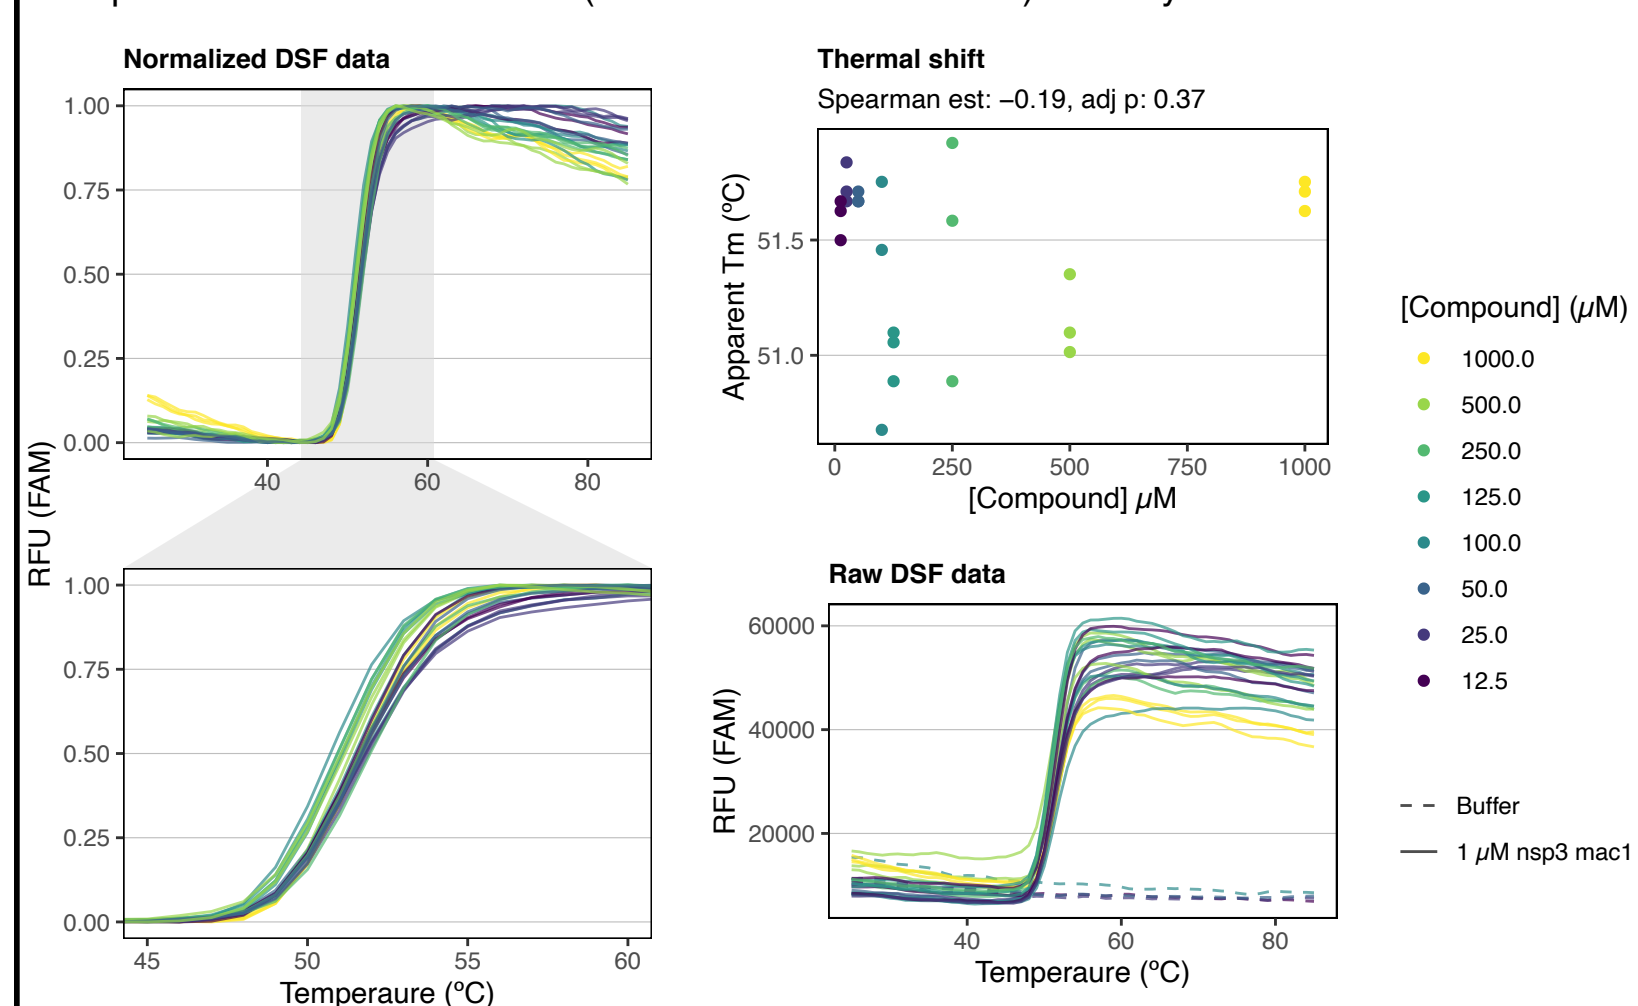

Compound: ZINC000891493271 (a.k.a ZINC000891493271) | Library: Make-on-demand

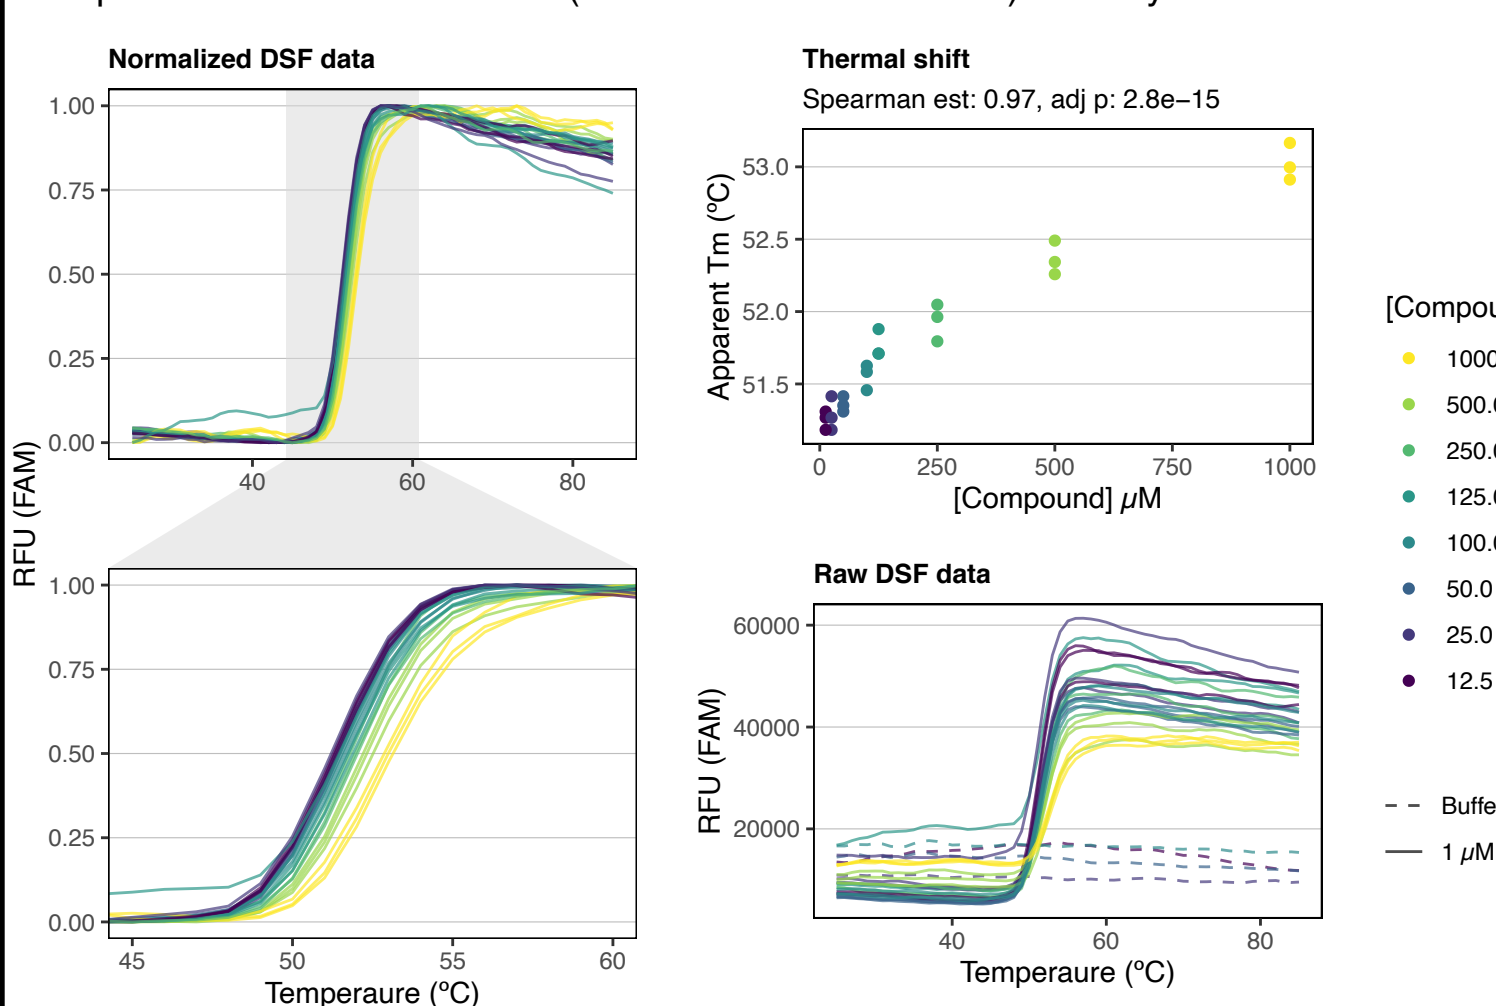

Compound: ZINC000893191027 (a.k.a ZINC000893191027) | Library: Make-on-demand

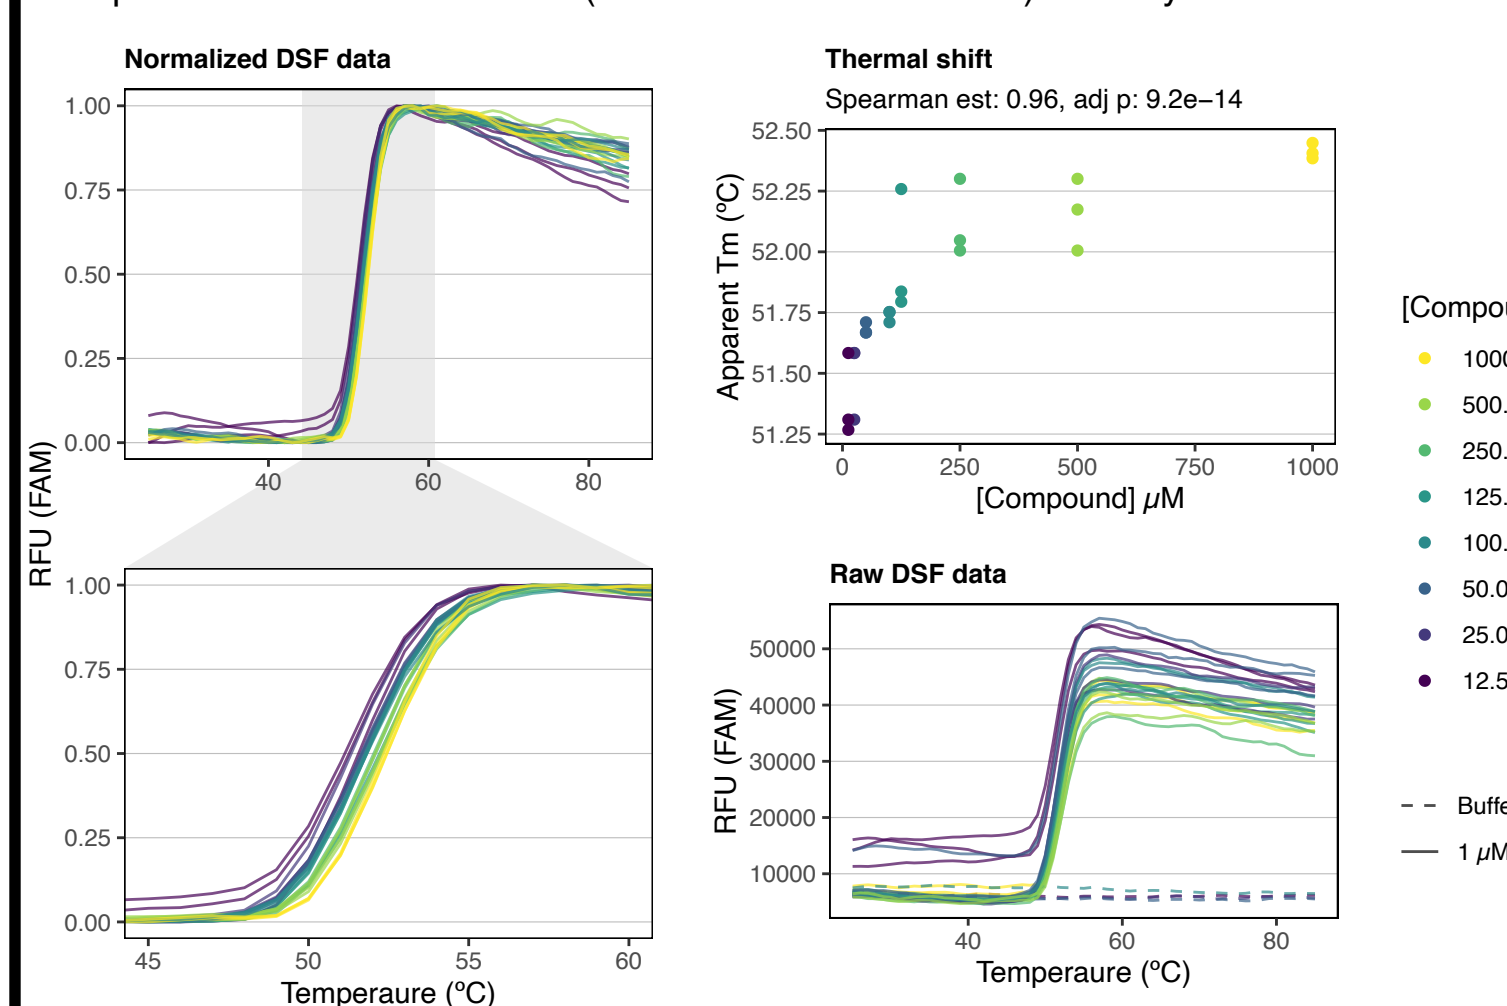

Compound: ZINC000896334066 (a.k.a ZINC000896334066) | Library: Make-on-demand

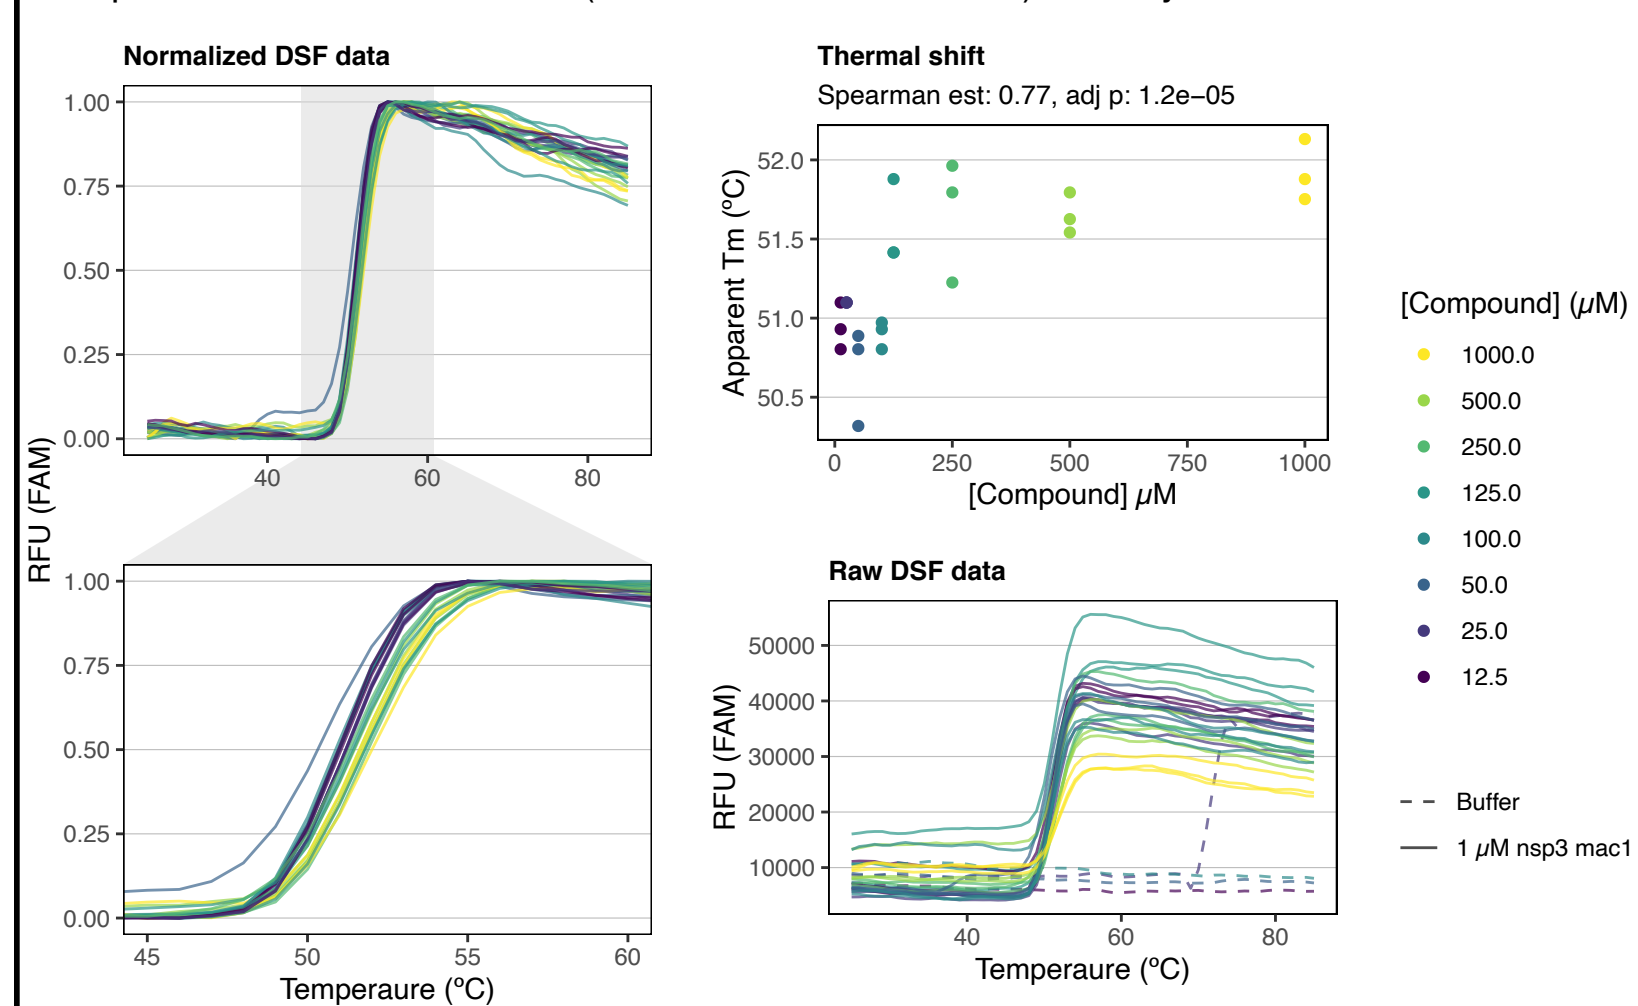

Compound: ZINC000896845531 (a.k.a ZINC000896845531) | Library: Make-on-demand

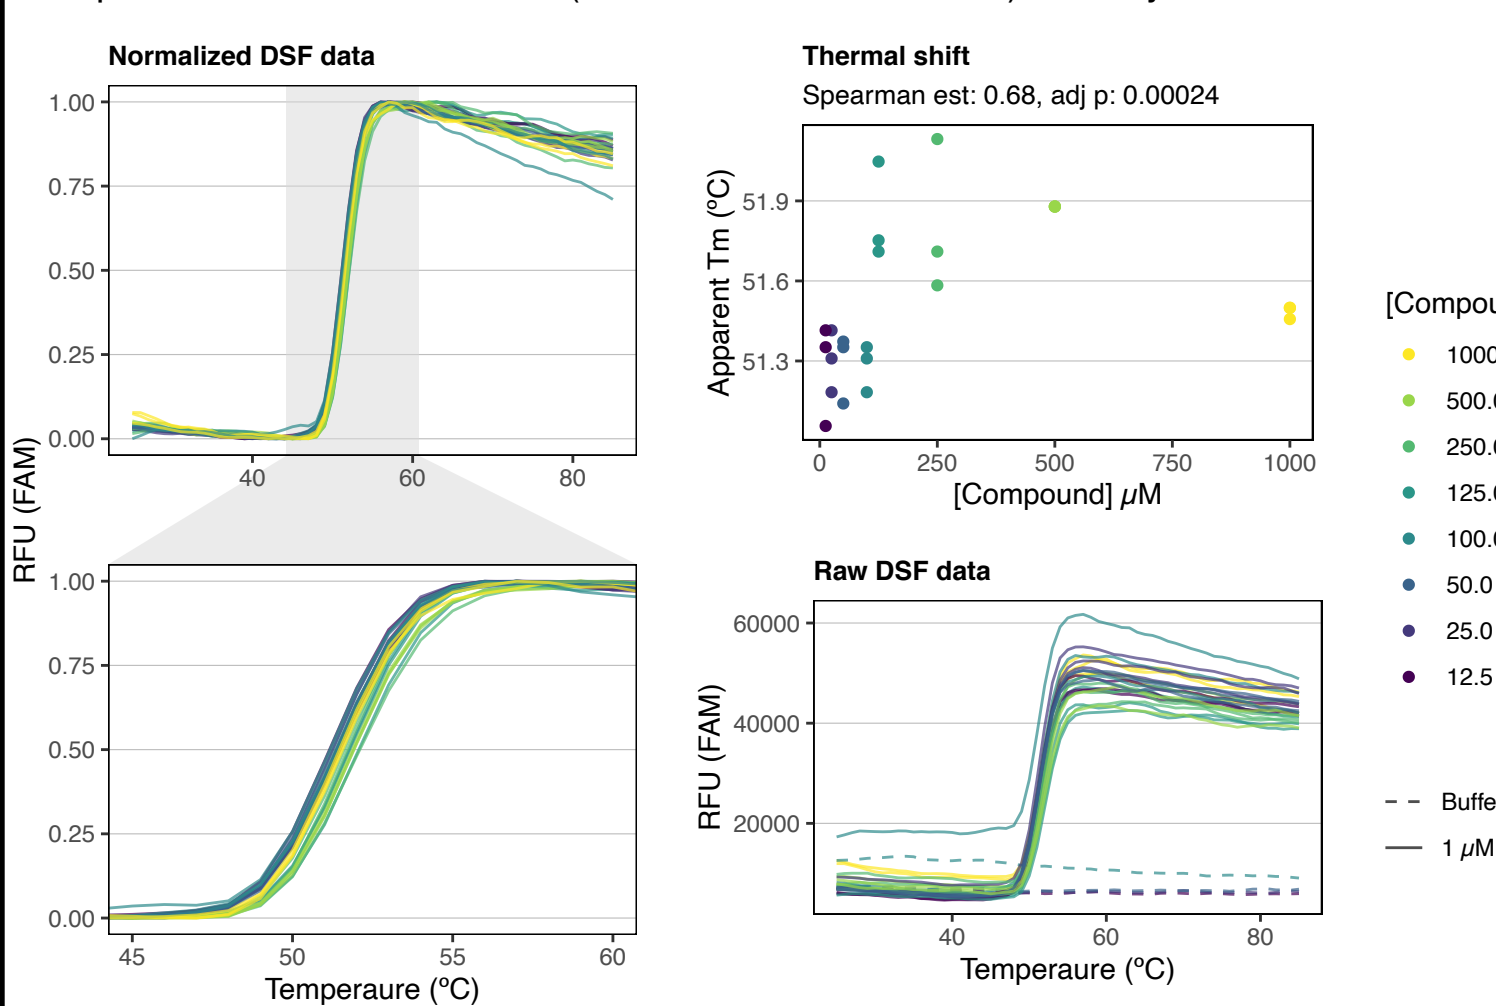

Compound: ZINC000897286891 (a.k.a ZINC000897286891) | Library: Make-on-demand

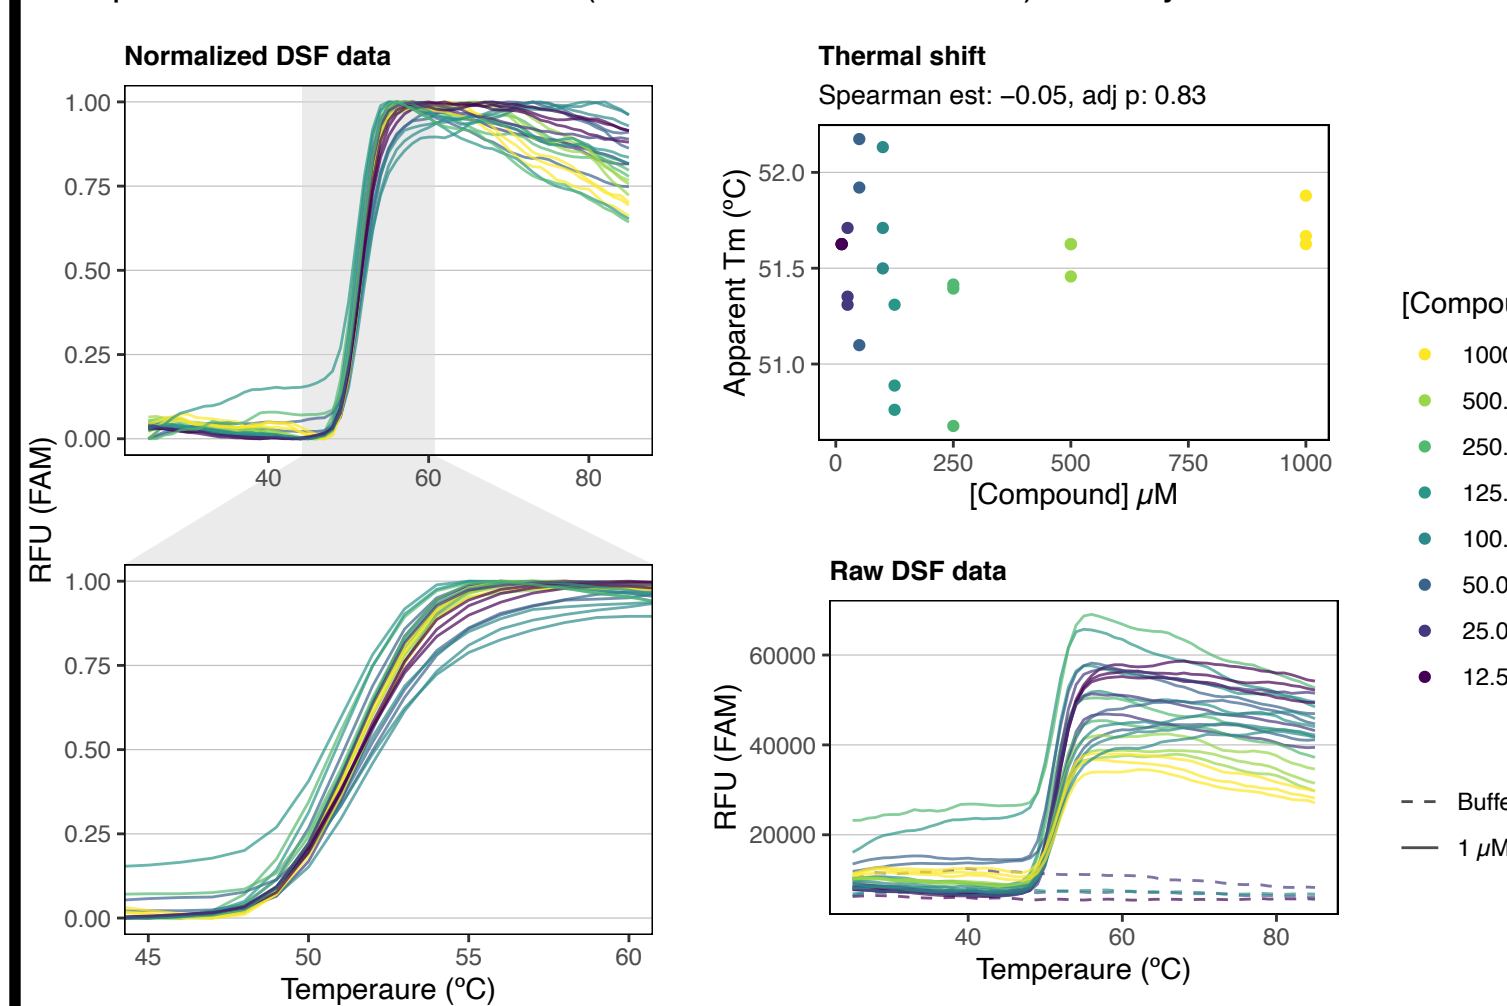

Compound: ZINC000904236028 (a.k.a ZINC000904236028) | Library: Make-on-demand

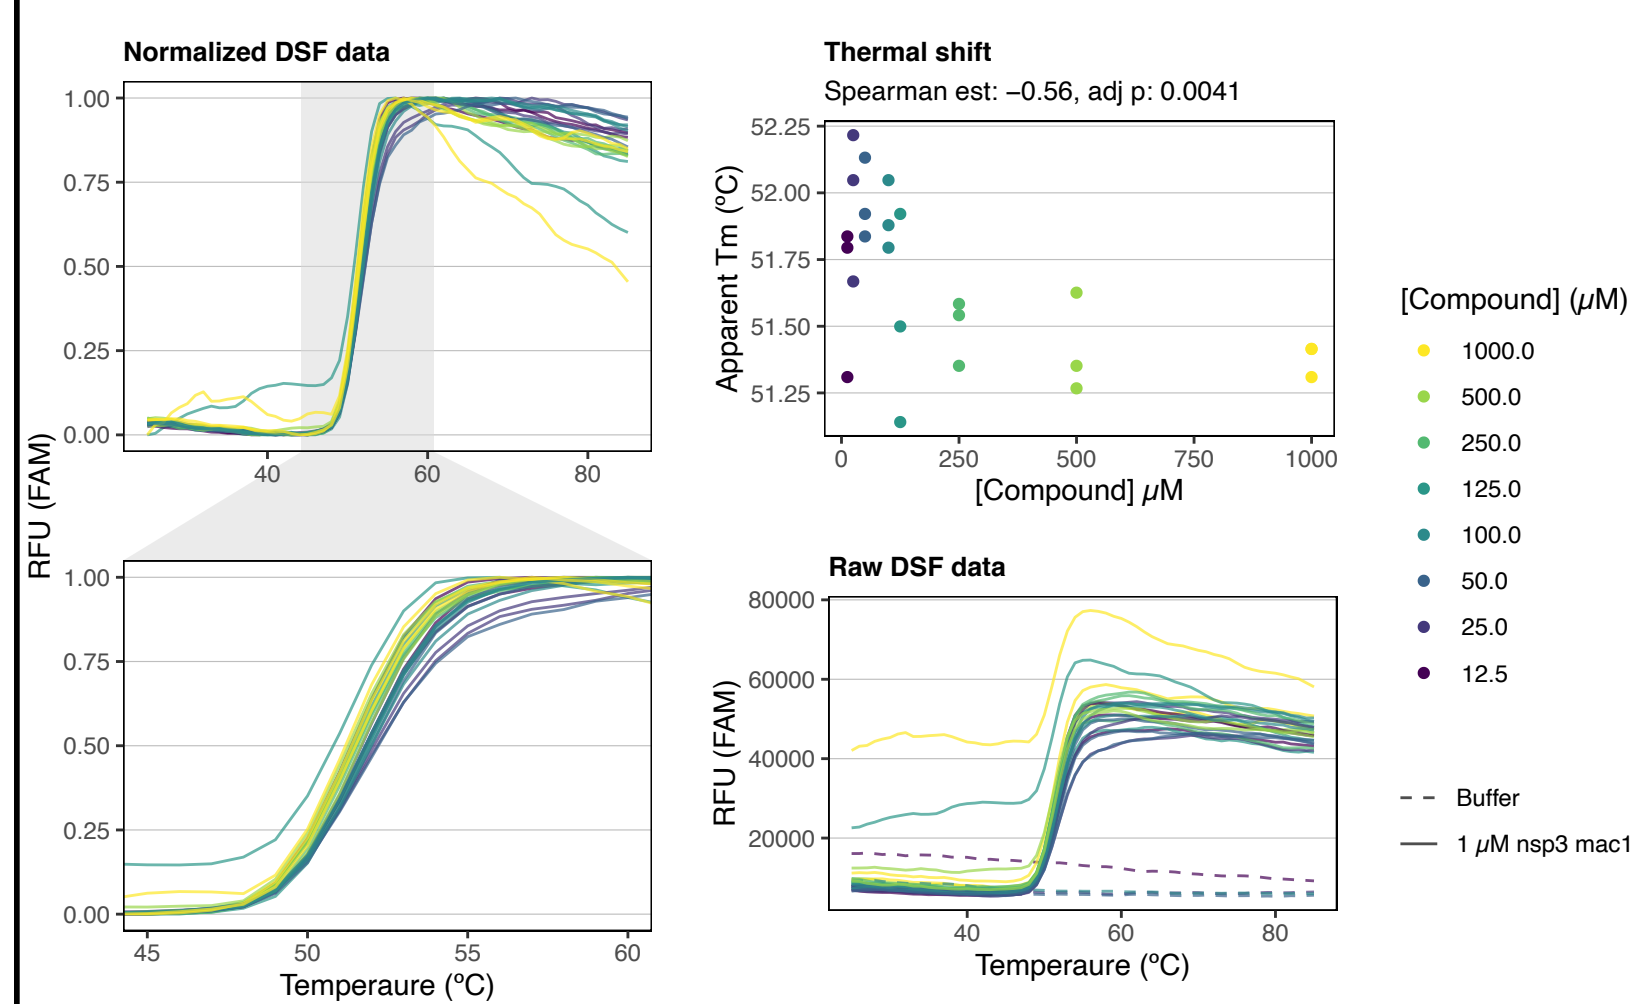

Compound: ZINC000905245728 (a.k.a ZINC000905245728) | Library: Make-on-demand

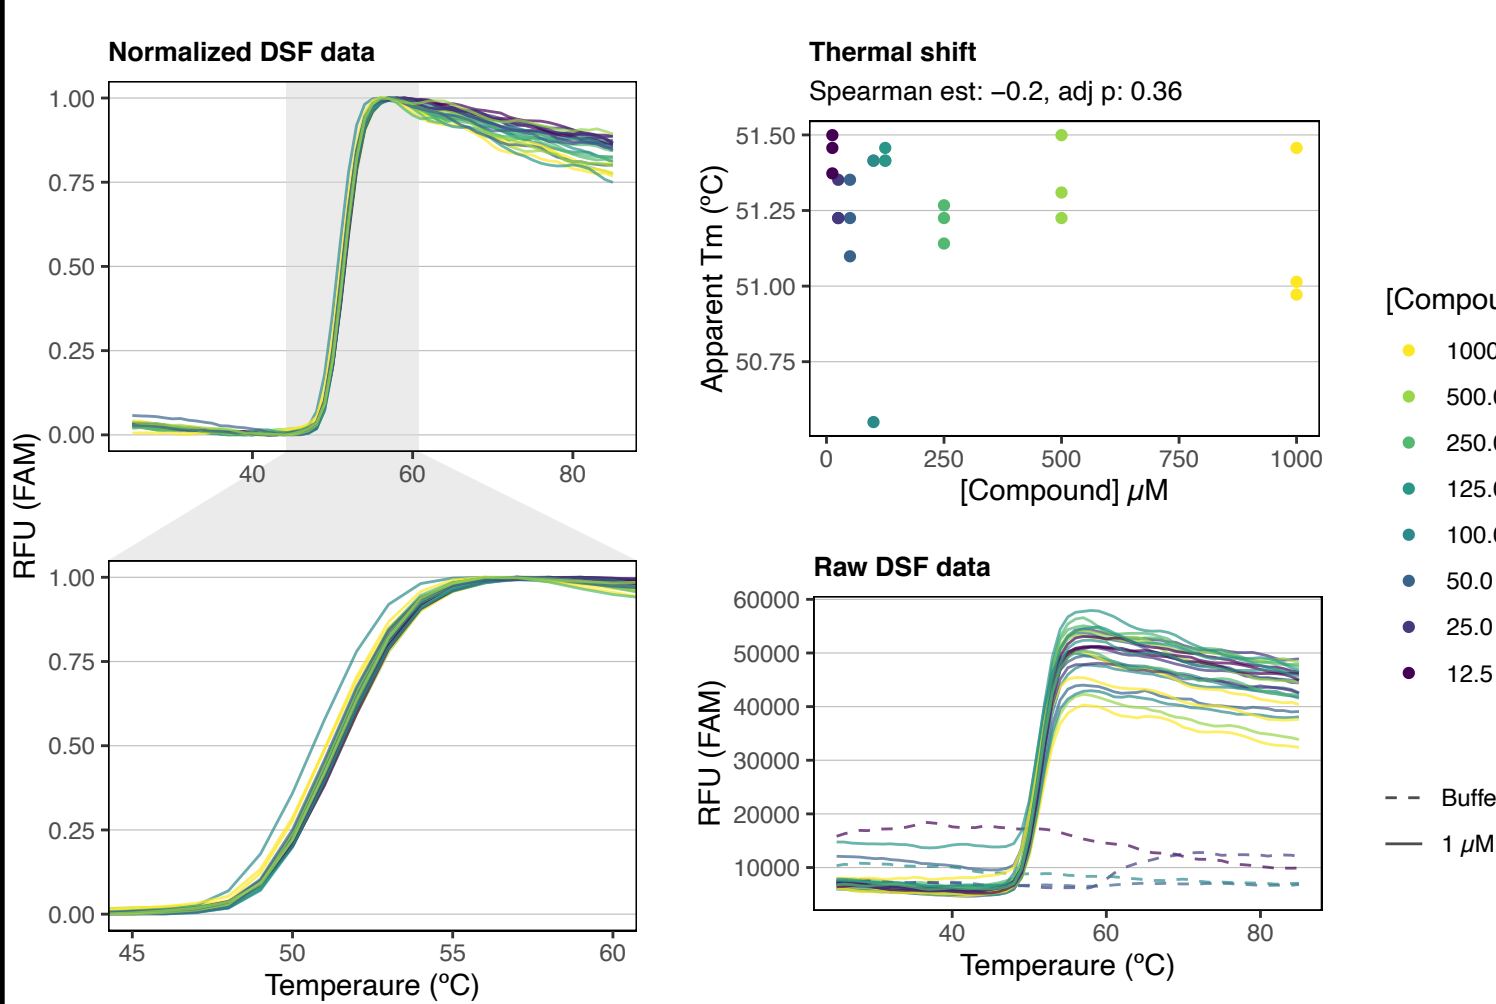

Compound: ZINC000910053700 (a.k.a ZINC000910053700) | Library: Make-on-demand

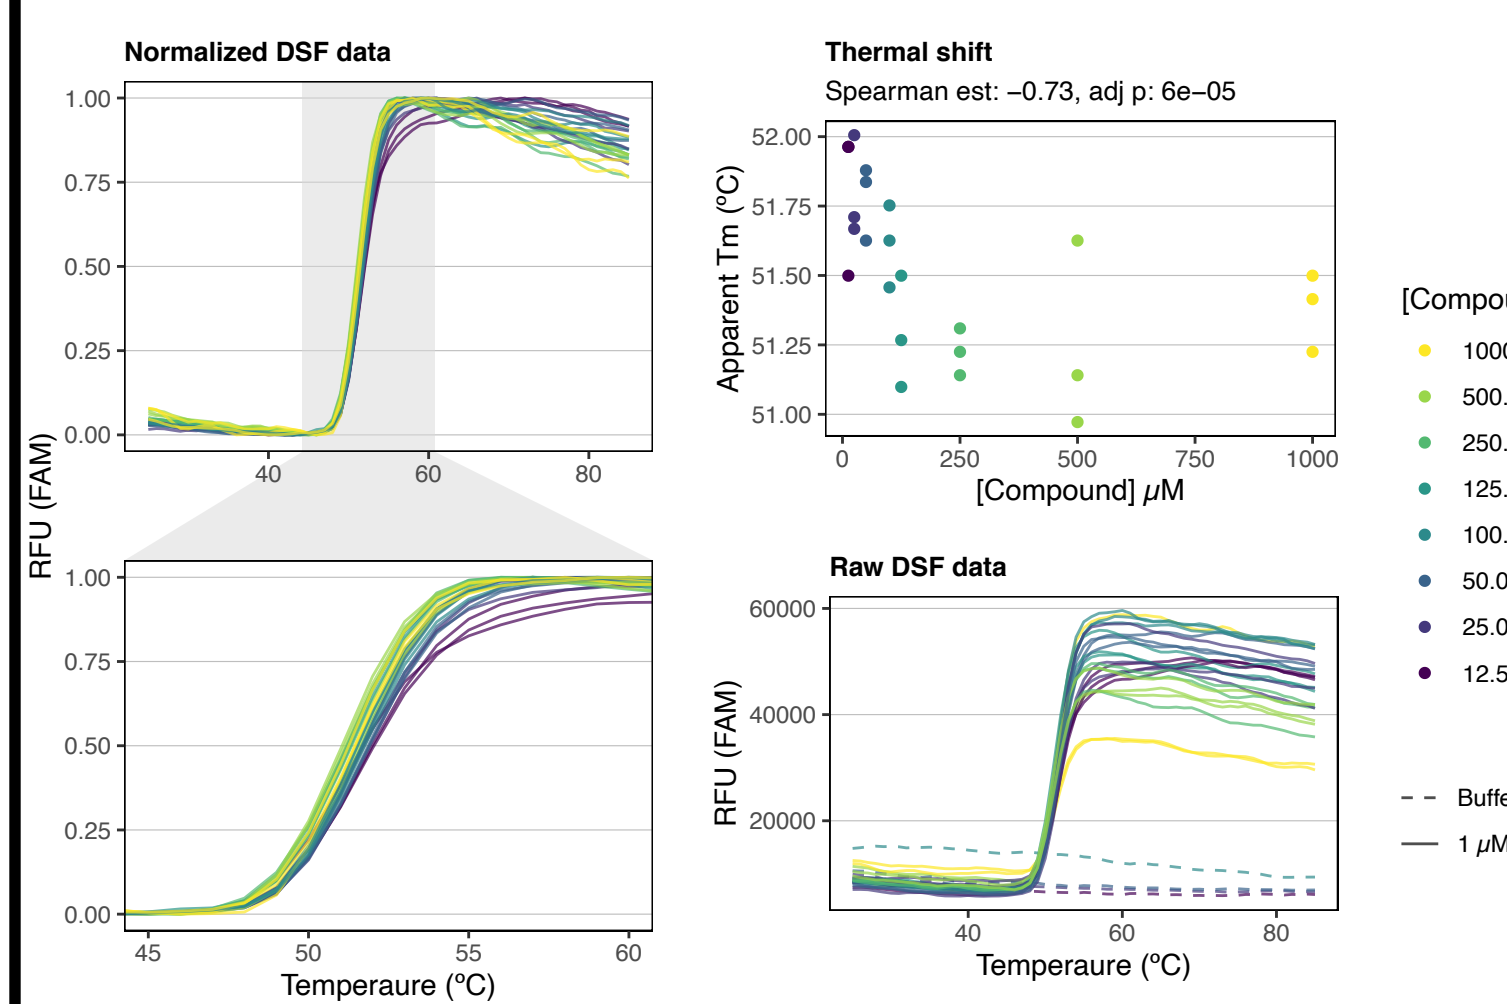

Compound: ZINC000910475722 (a.k.a ZINC000910475722) | Library: Make-on-demand

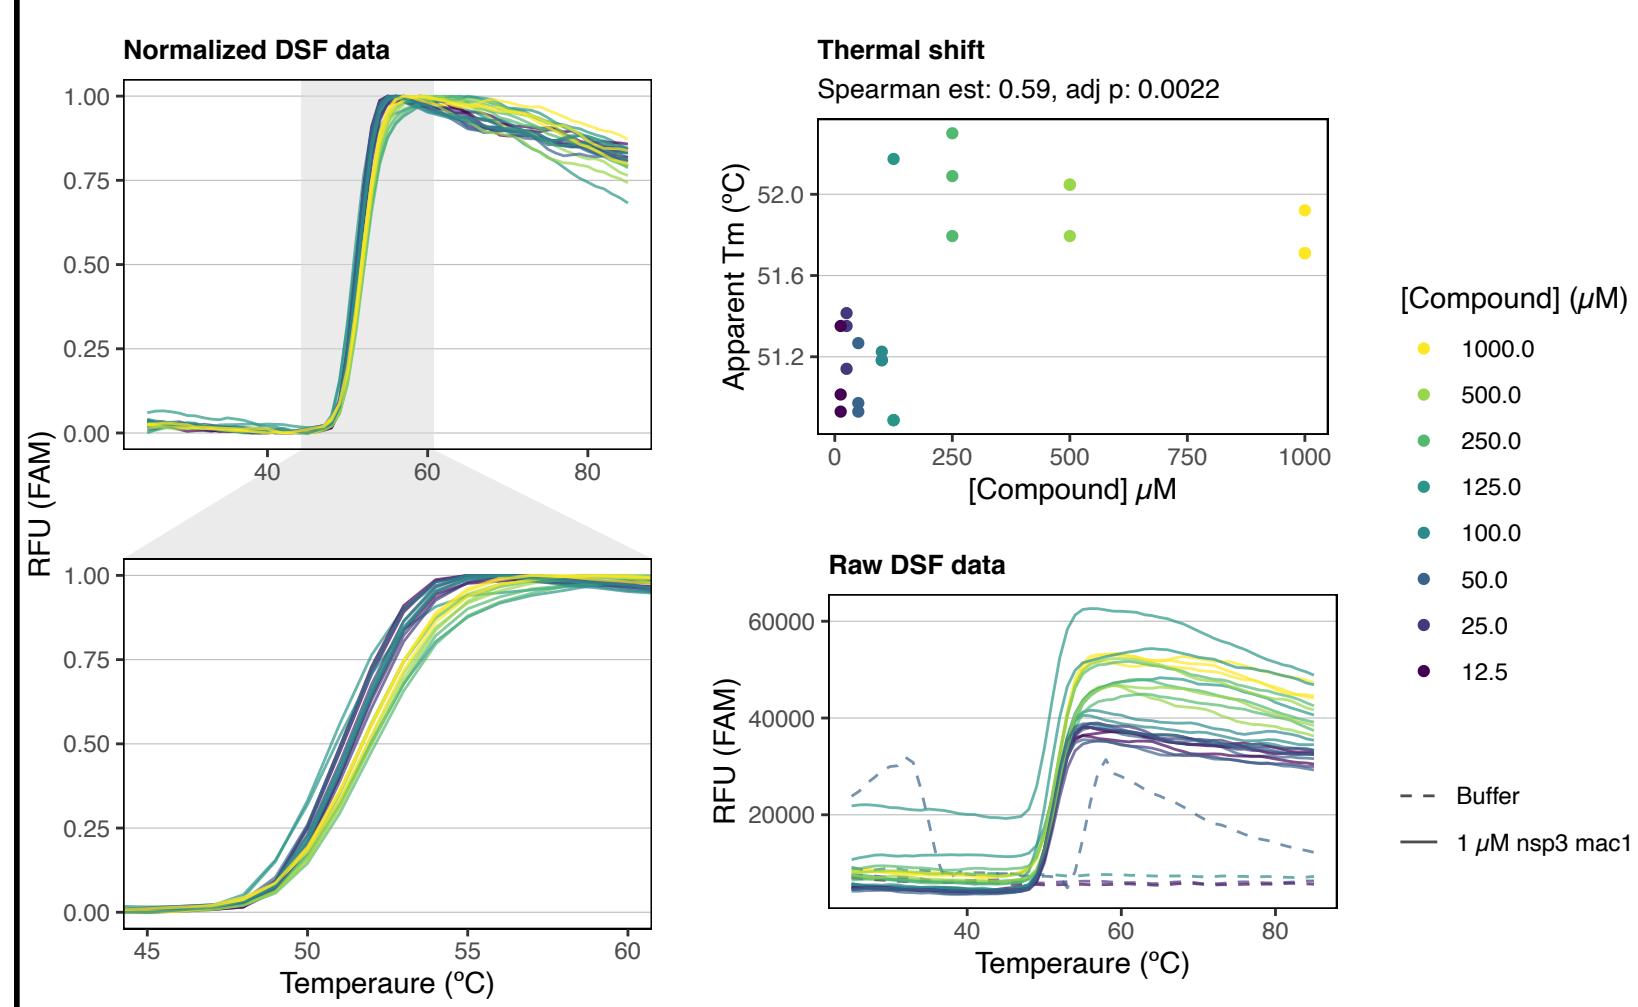

Compound: ZINC000920153280 (a.k.a ZINC000920153280) | Library: Make-on-demand

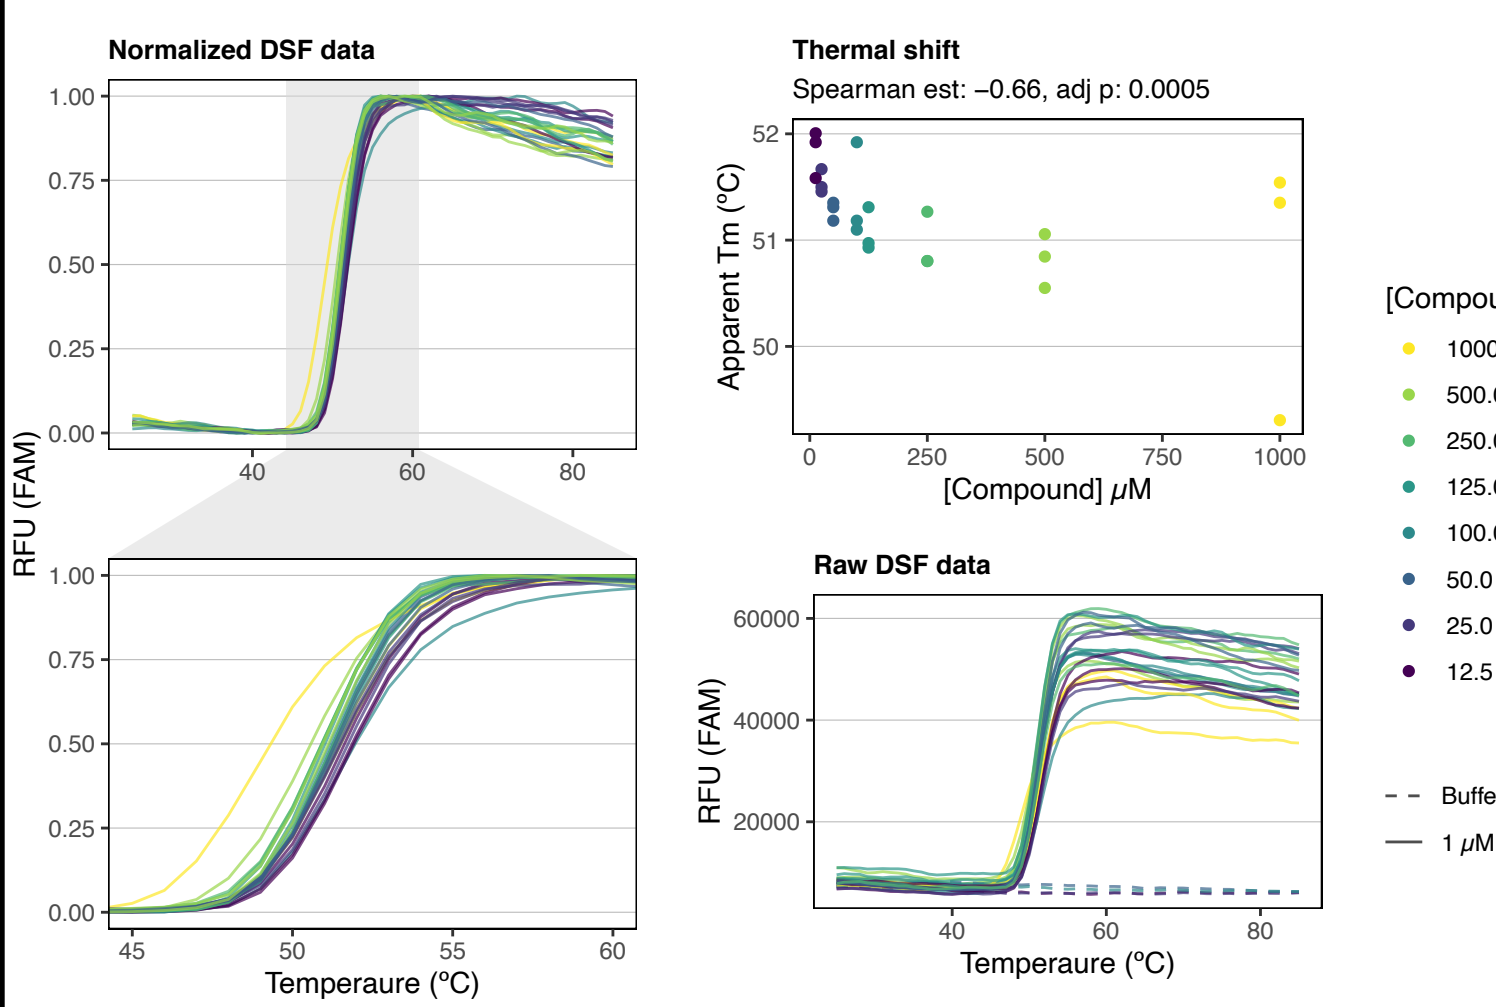

Compound: ZINC000924094620 (a.k.a ZINC000924094620) | Library: Make-on-demand

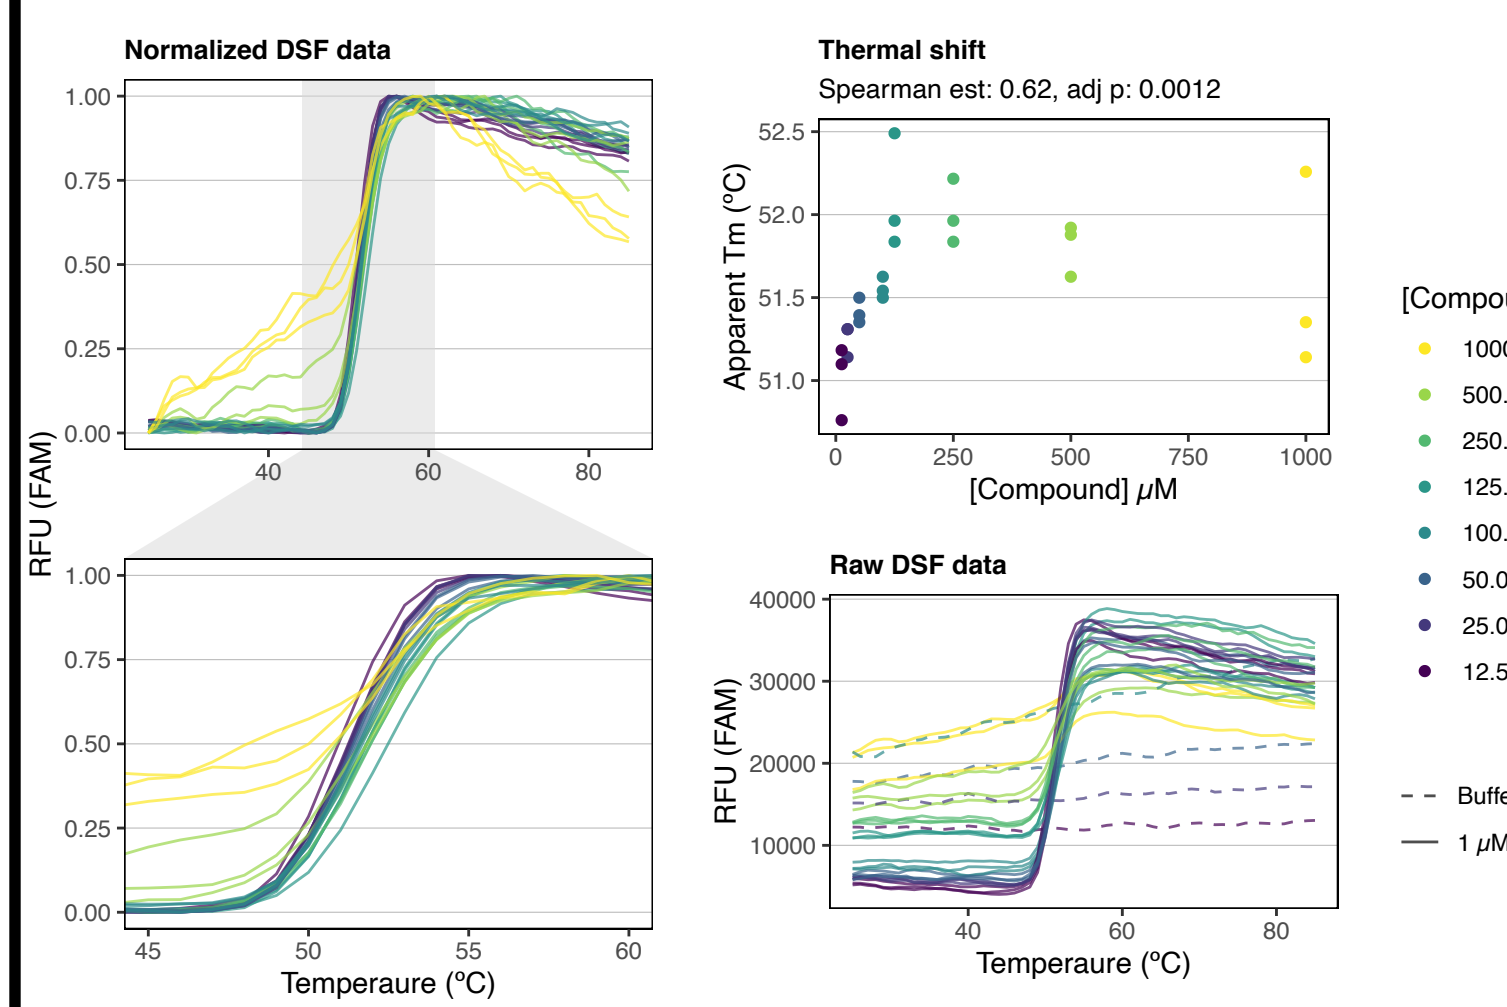

Compound: ZINC001165768885 (a.k.a ZINC001165768885) | Library: Make-on-demand

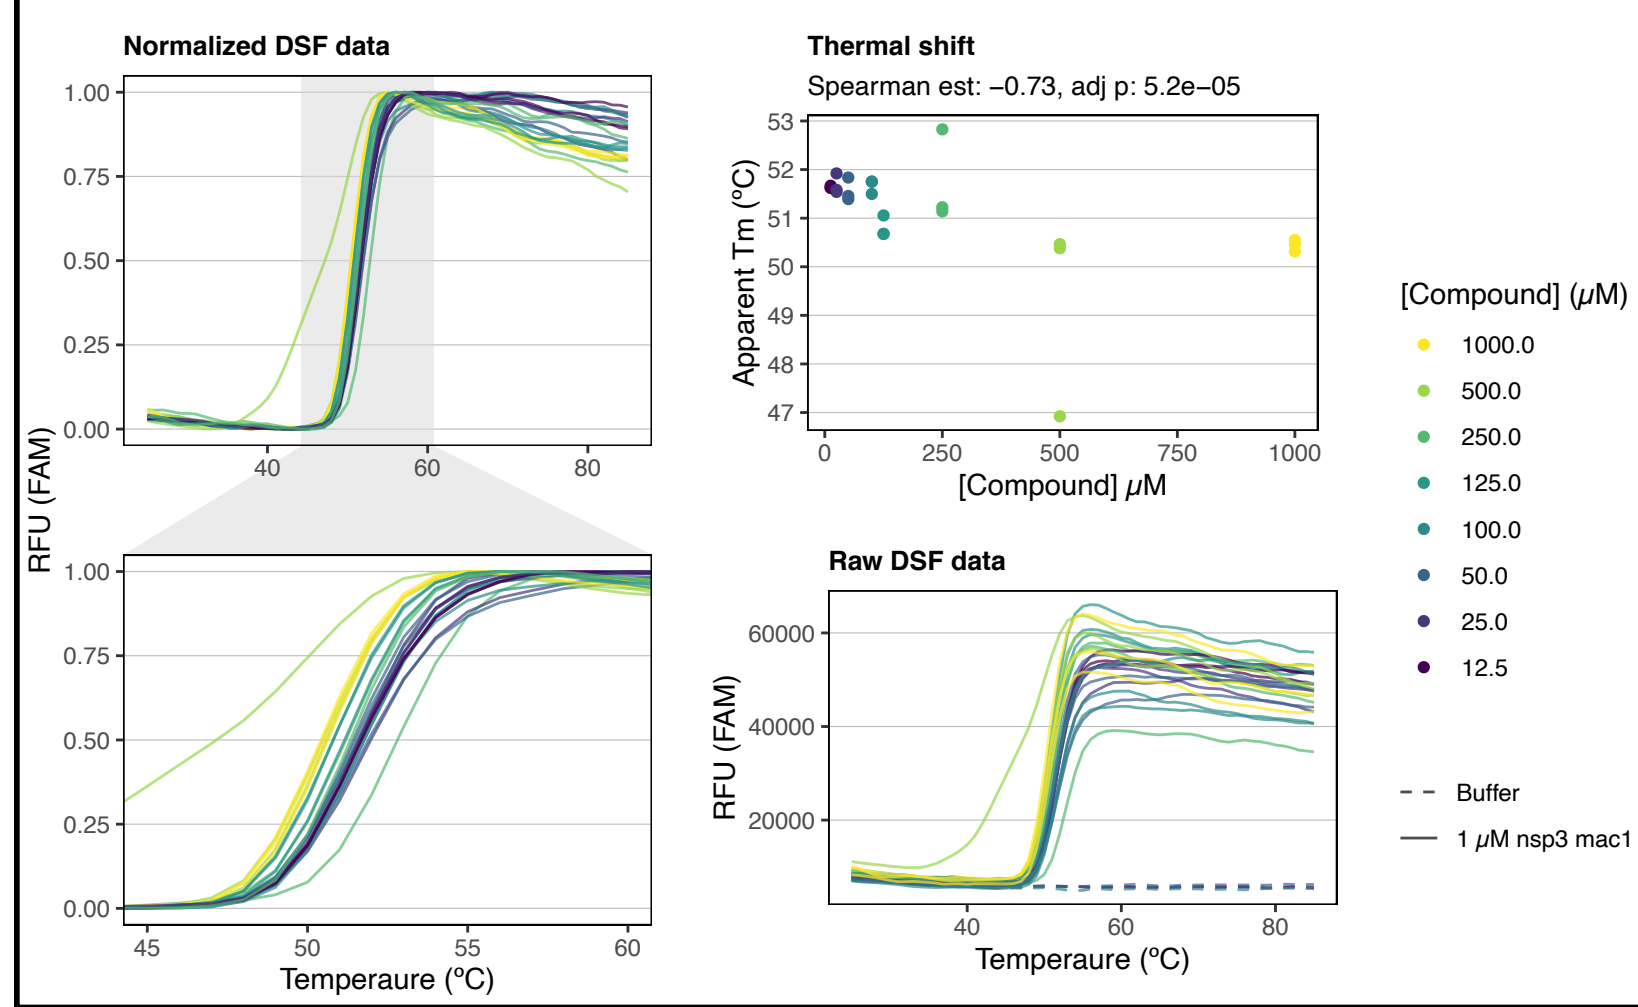

Compound: ZINC001184571635 (a.k.a ZINC001184571635) | Library: Make-on-demand

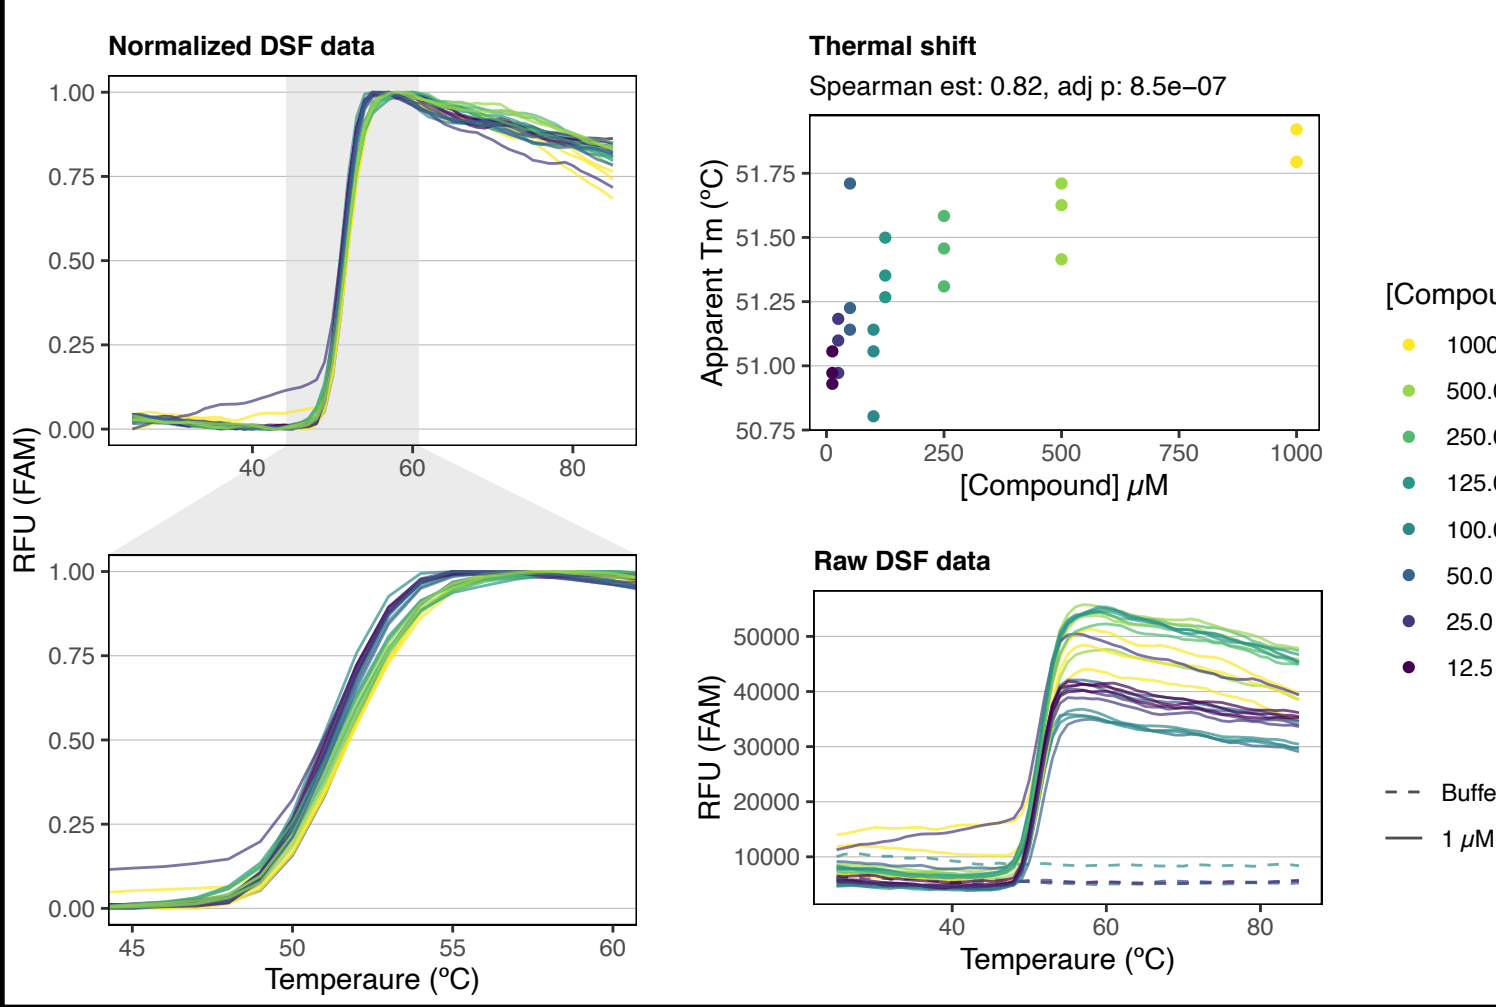

Compound: ZINC001187497156 (a.k.a ZINC001187497156) | Library: Make-on-demand

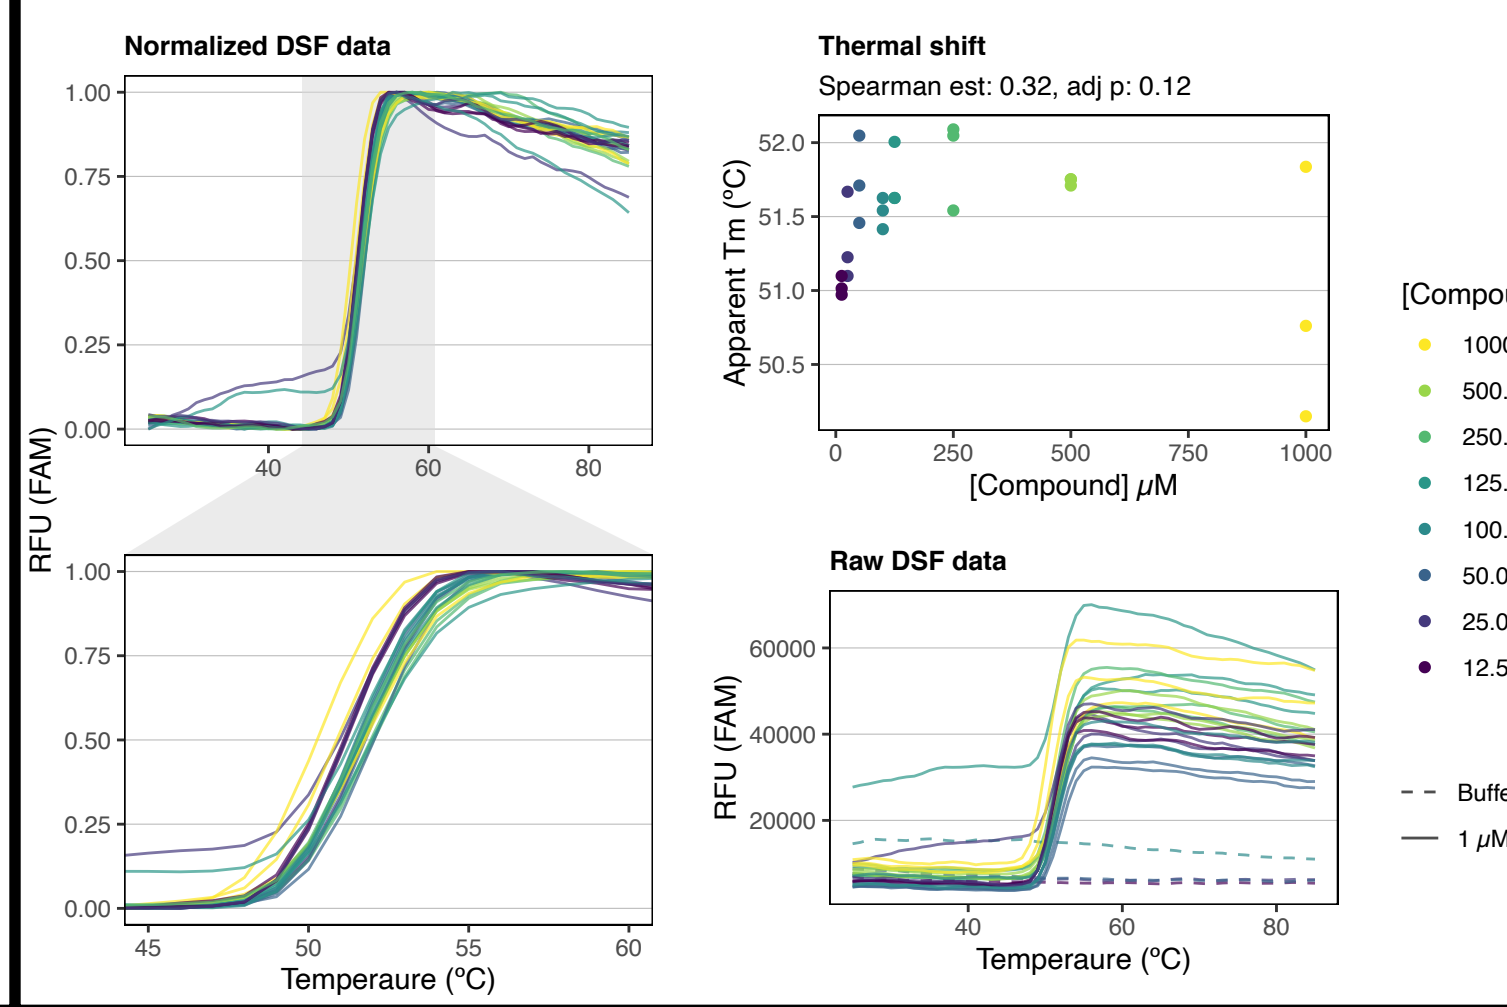

Compound: ZINC001337833291 (a.k.a ZINC001337833291) | Library: Make-on-demand

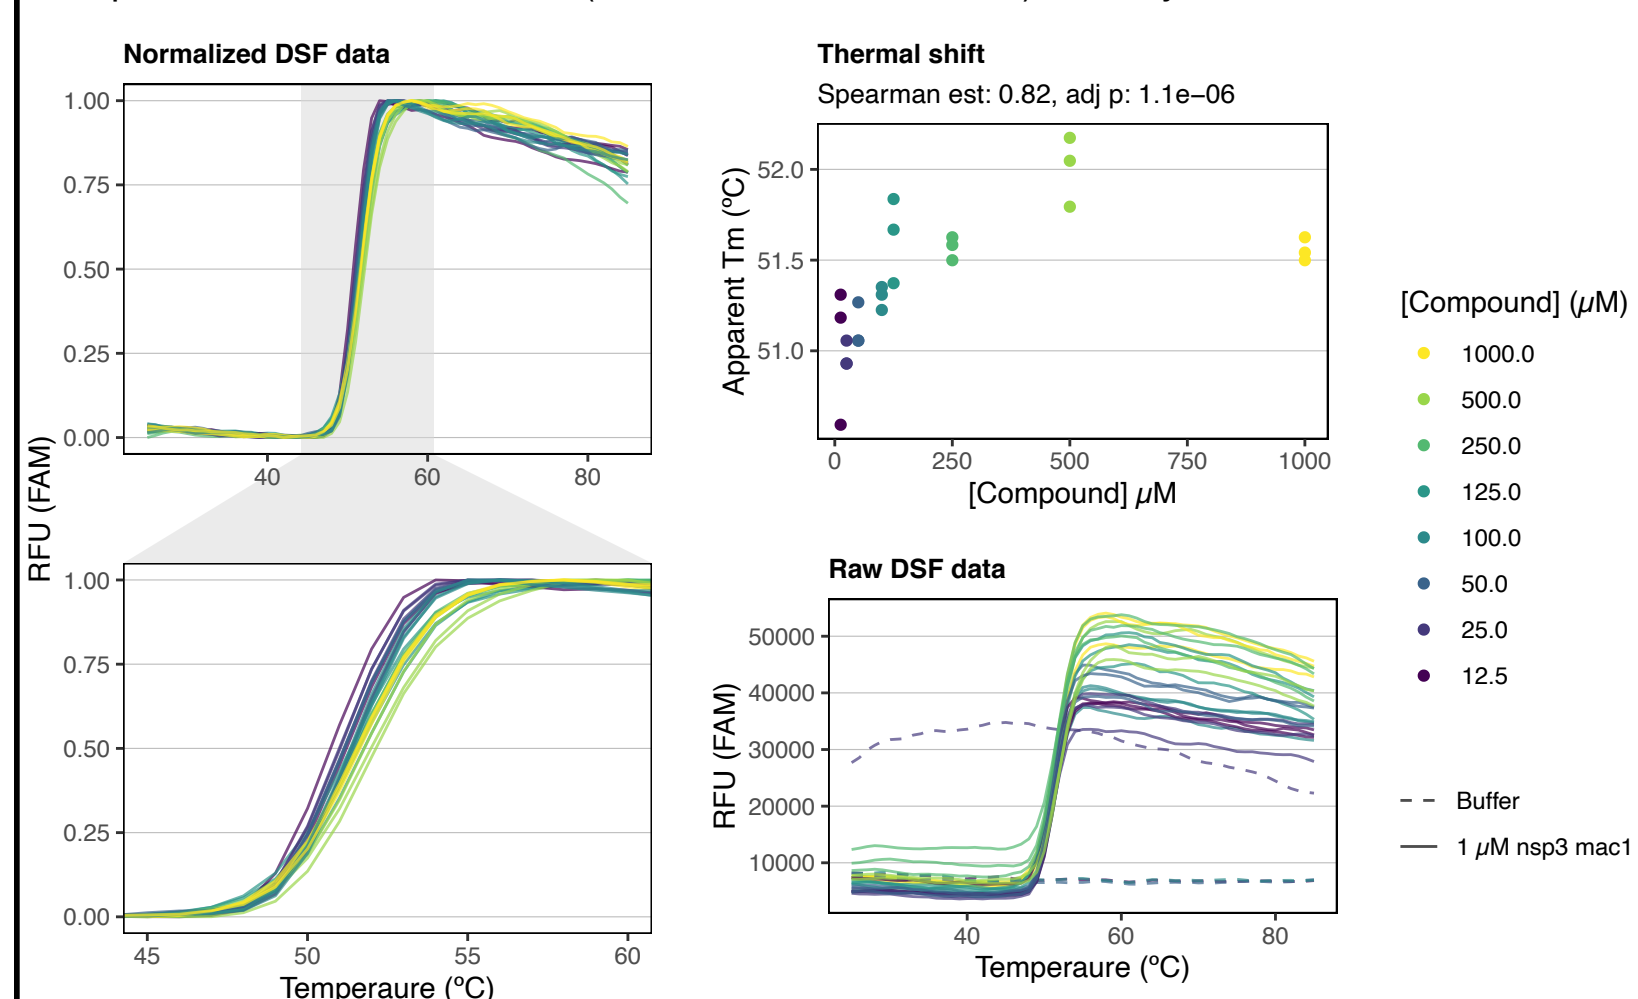

Compound: ZINC001364194305 (a.k.a ZINC001364194305) | Library: Make-on-demand

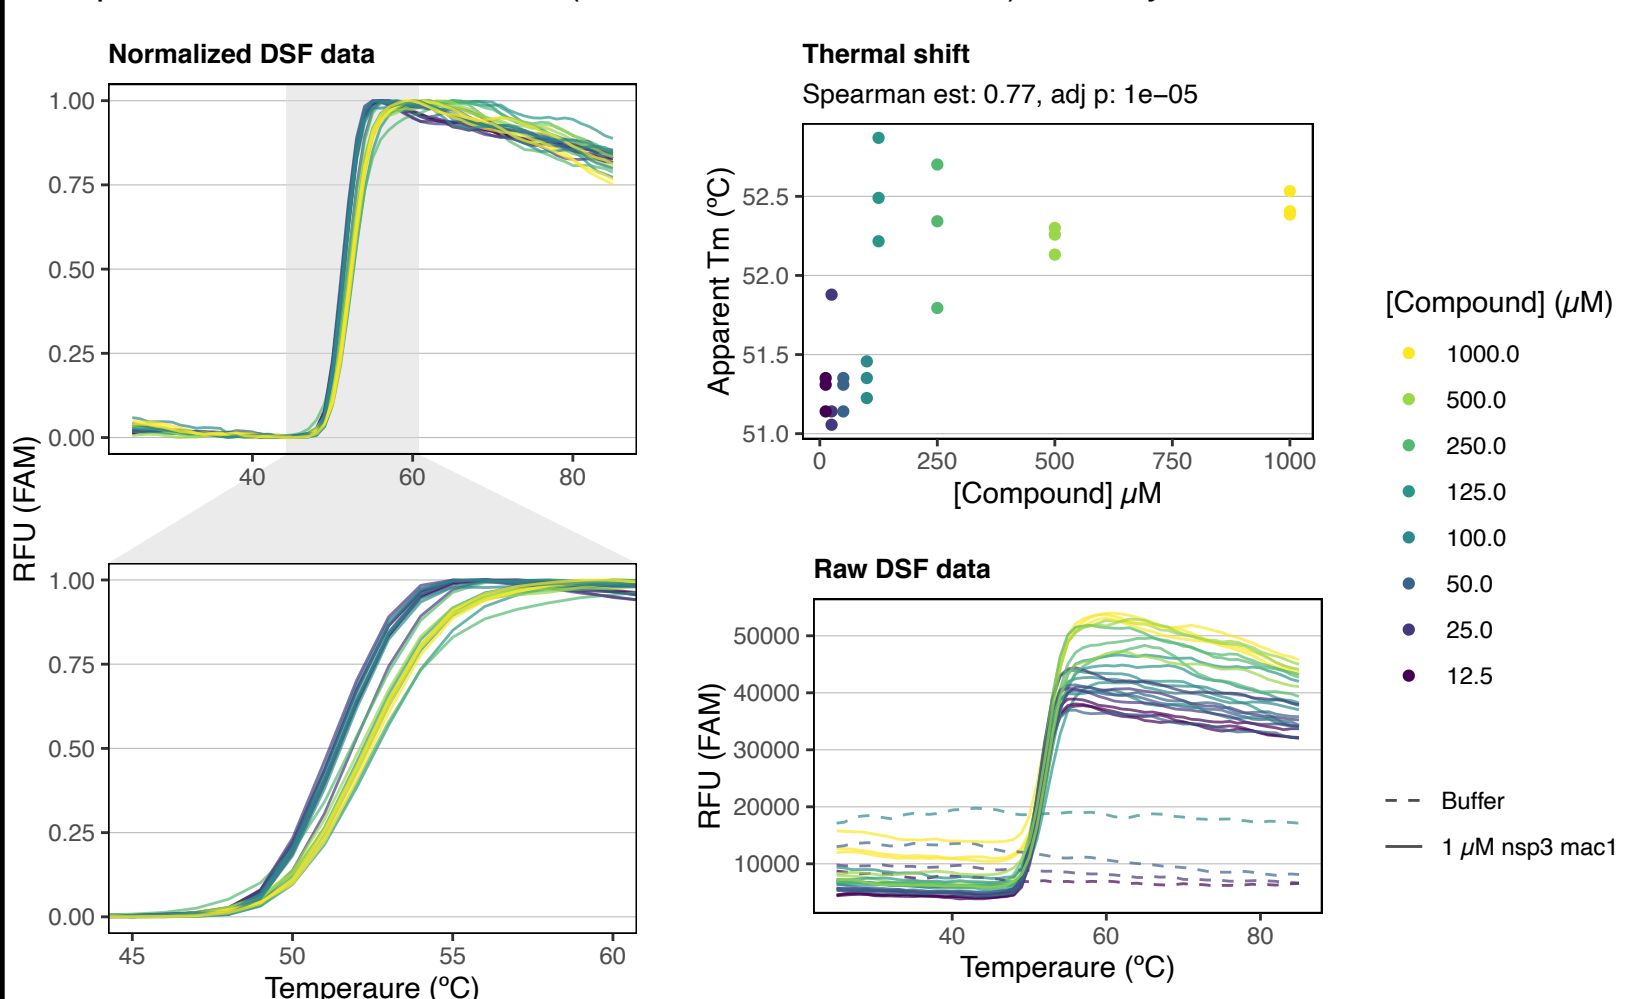

Compound: ZINC001364630288 (a.k.a ZINC001364630288) | Library: Make-on-demand

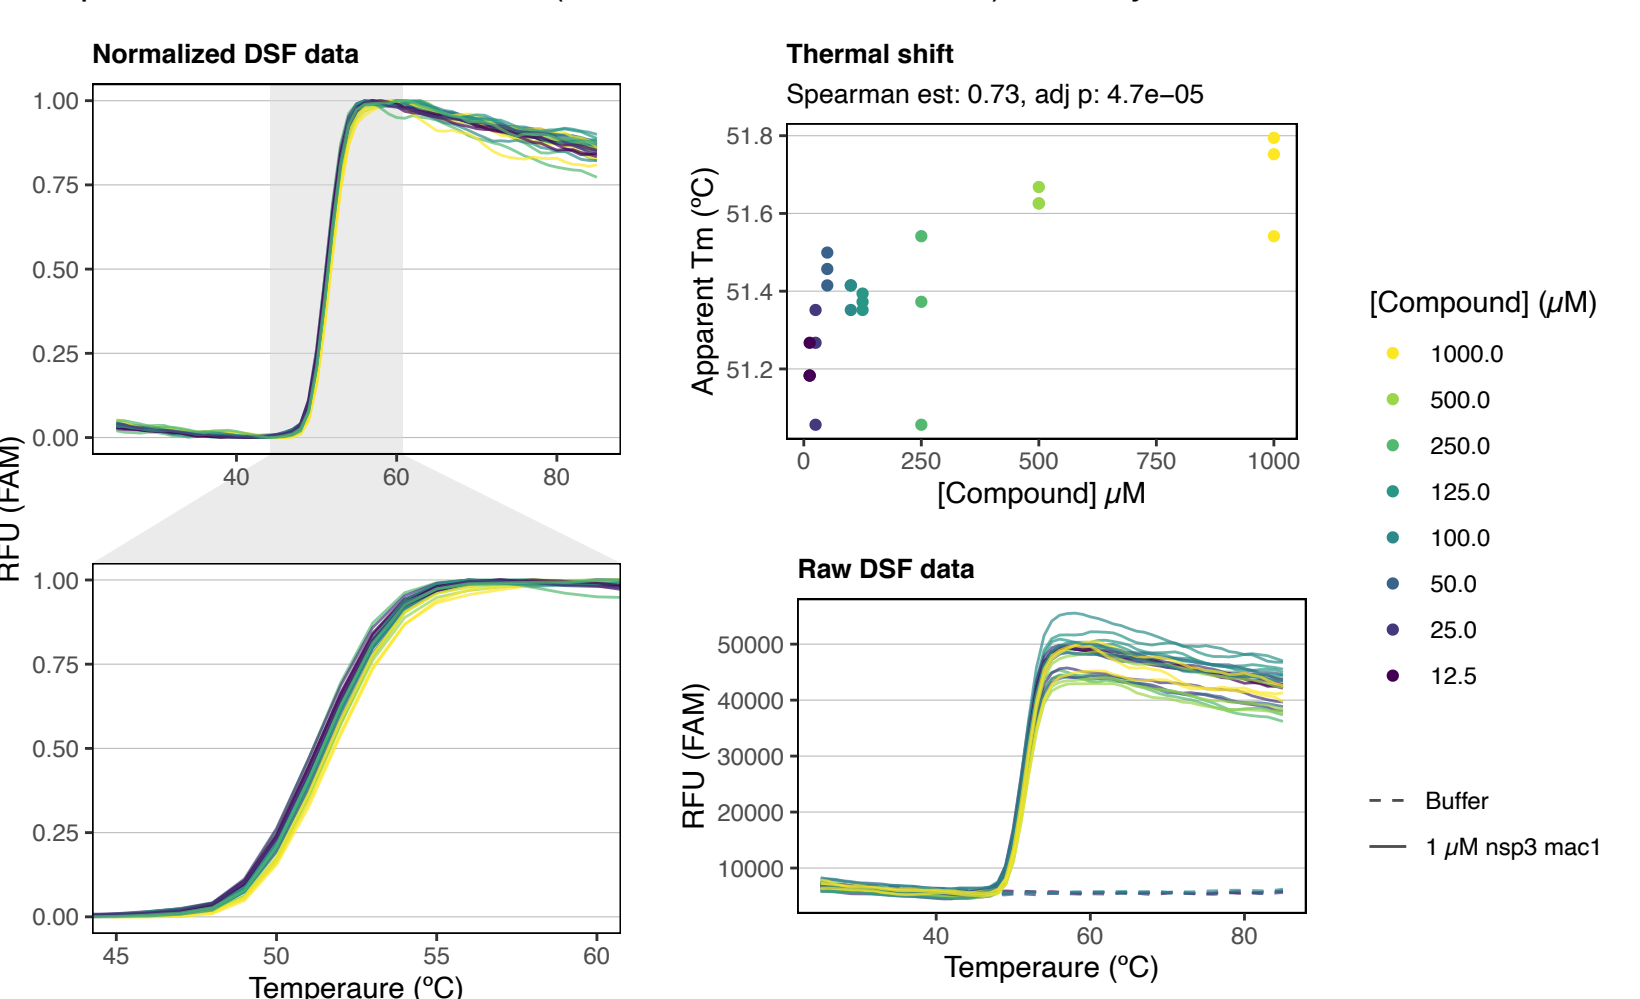

Compound: ZINC001458791015 (a.k.a ZINC001458791015) | Library: Make-on-demand

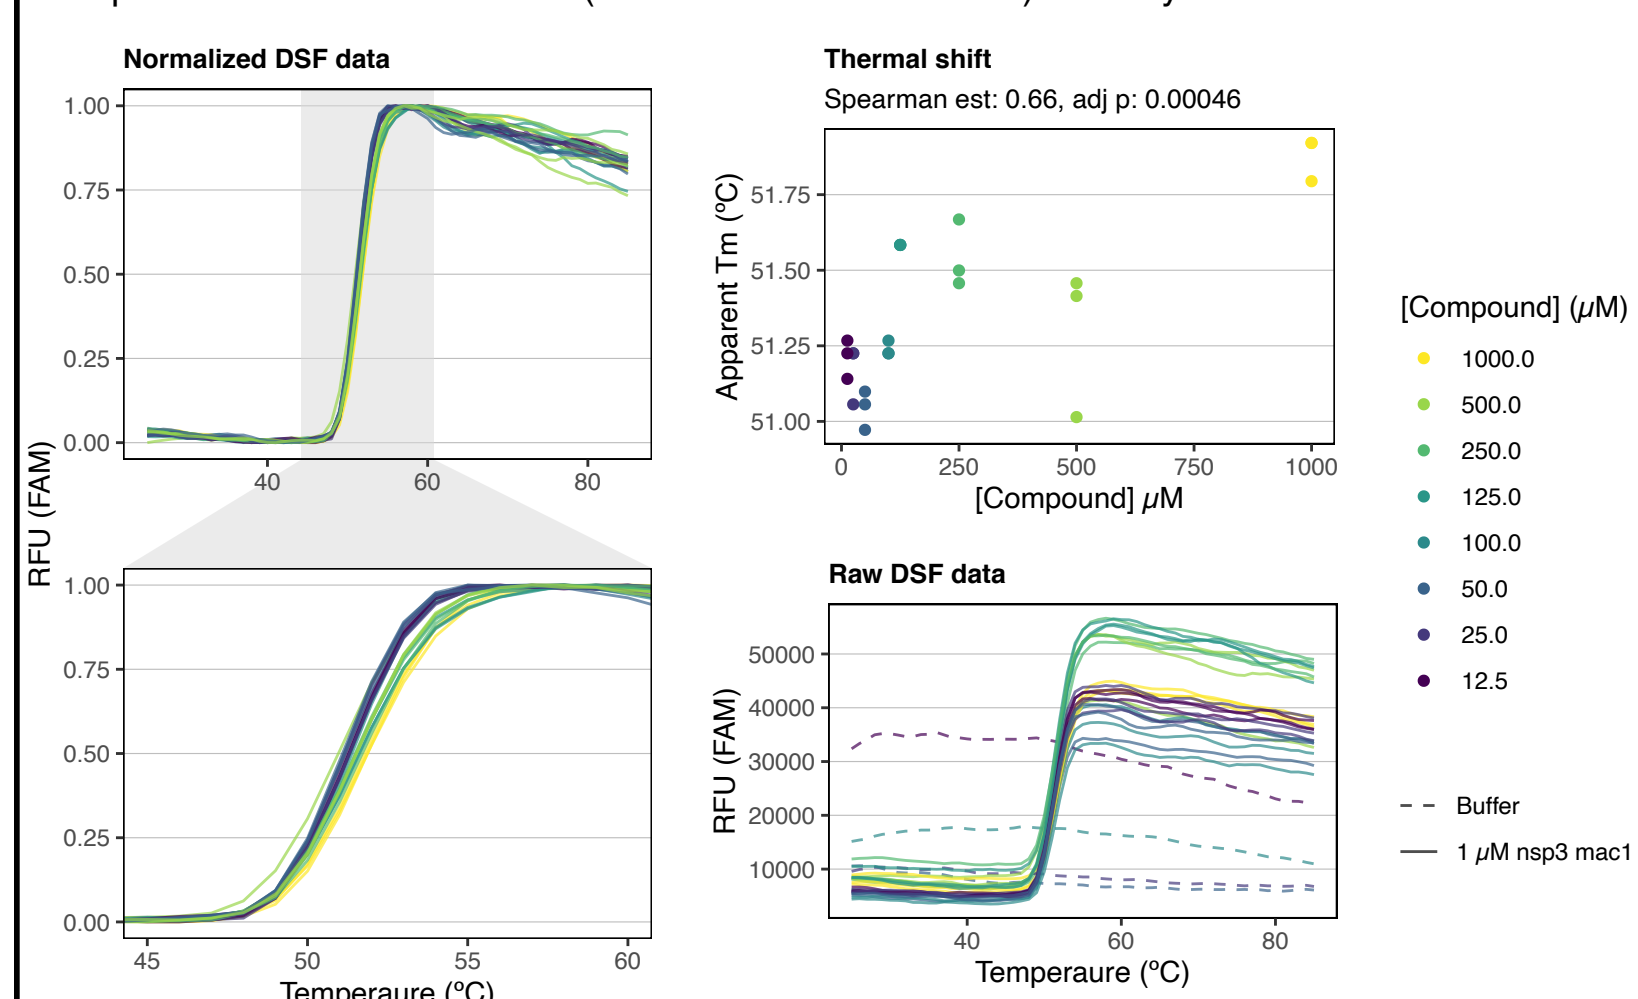

Compound: ZINC001472868186 (a.k.a ZINC001472868186) | Library: Make-on-demand

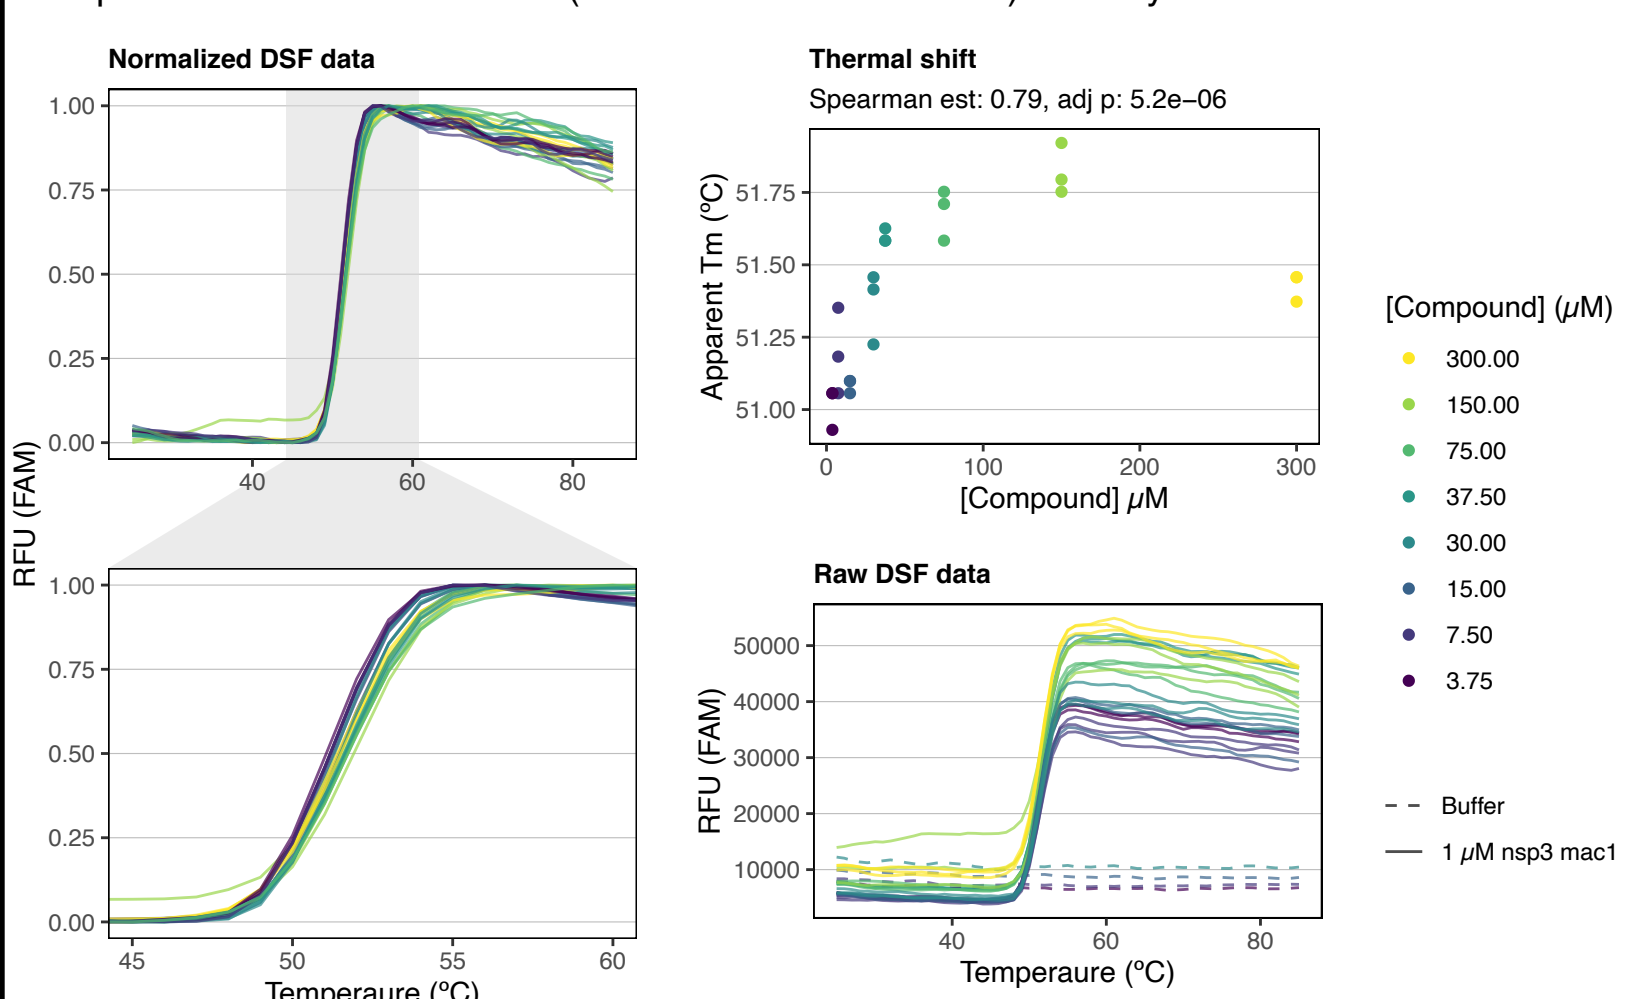

Compound: ZINC001559178387 (a.k.a ZINC001559178387) | Library: Make-on-demand

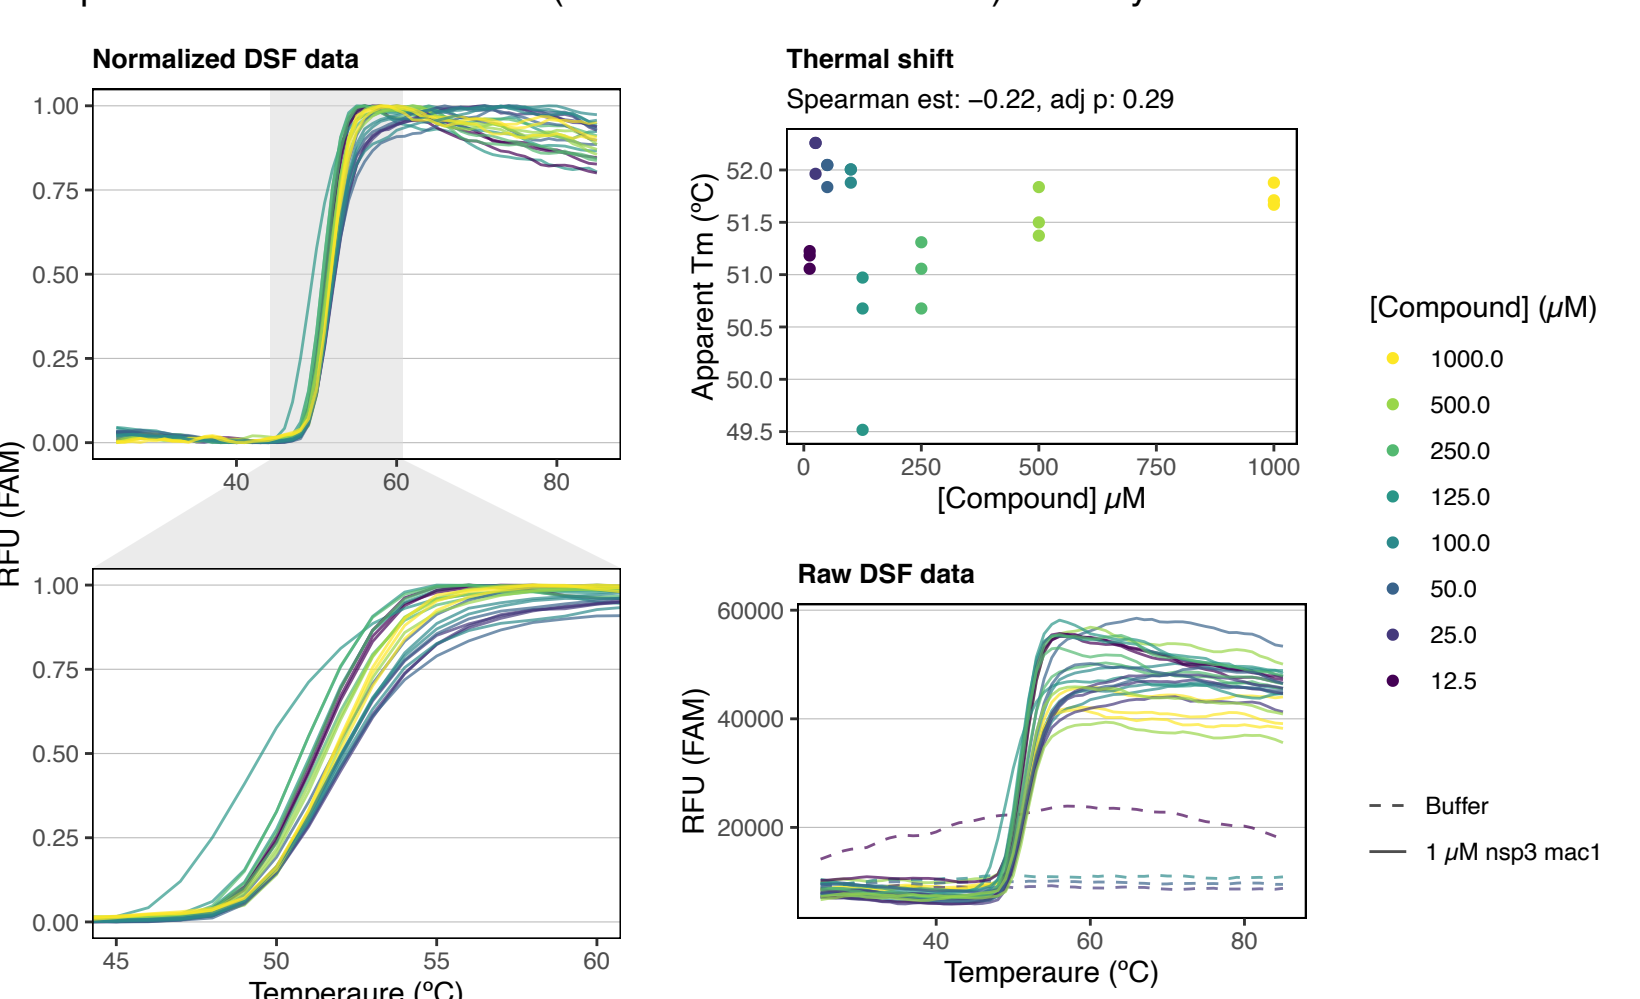

Compound: ZINC001641481086 (a.k.a ZINC001641481086) | Library: Make-on-demand

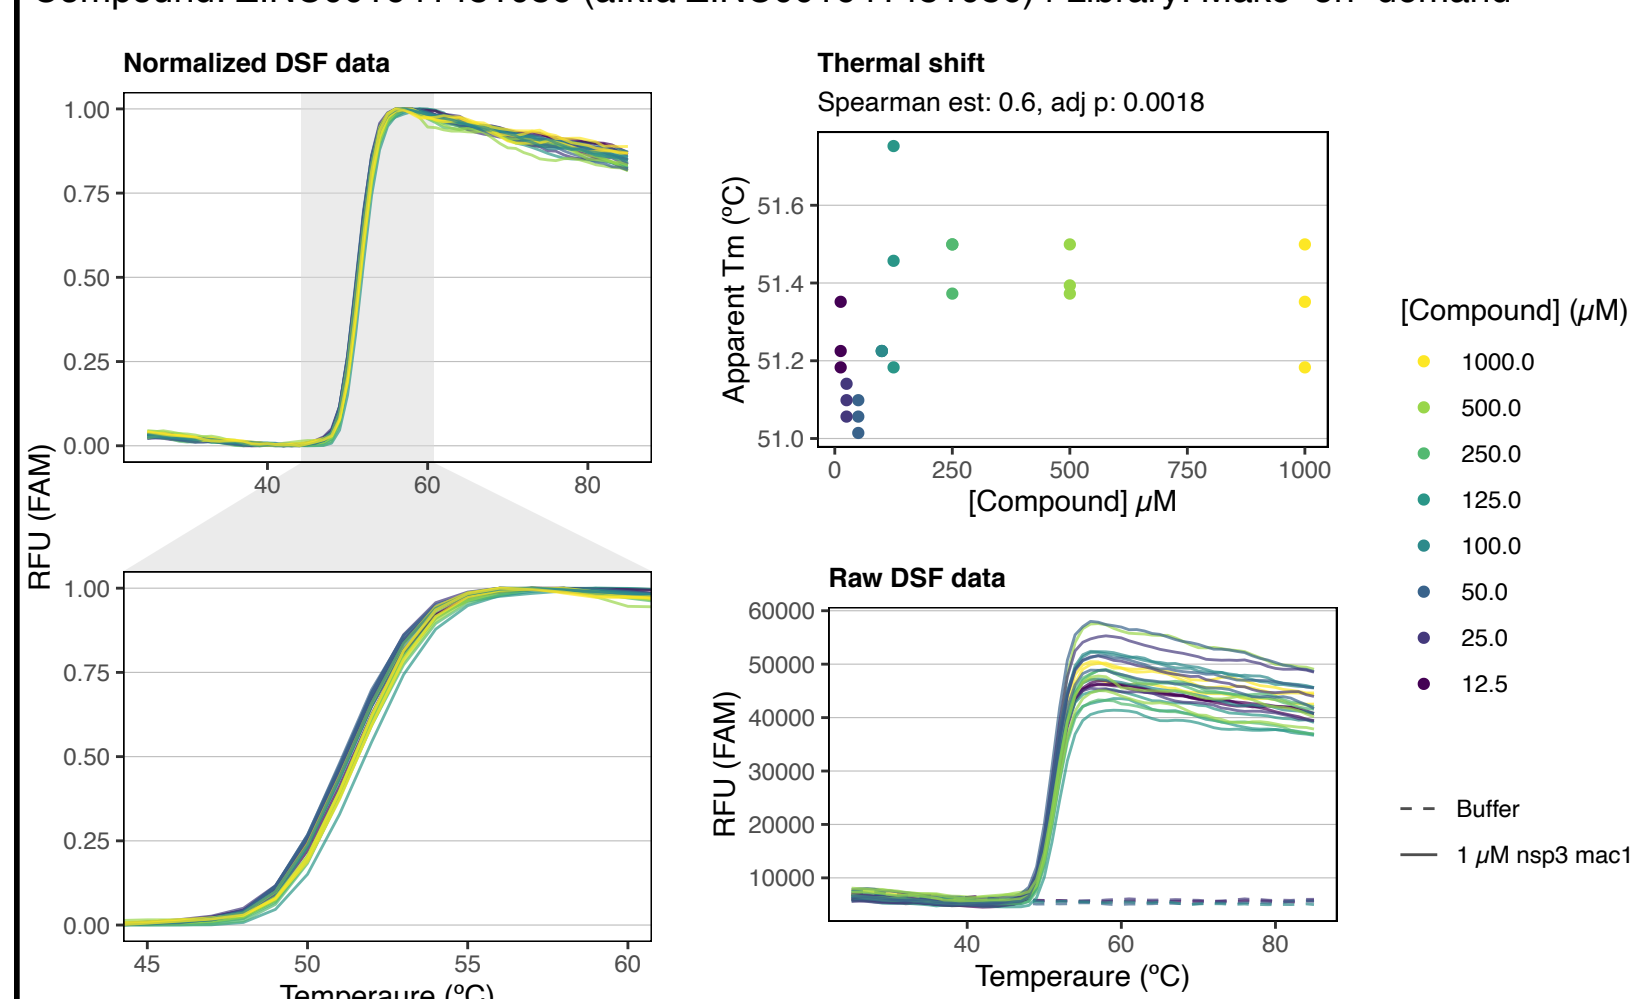

Compound: ZINC001652467570 (a.k.a ZINC001652467570) | Library: Make-on-demand

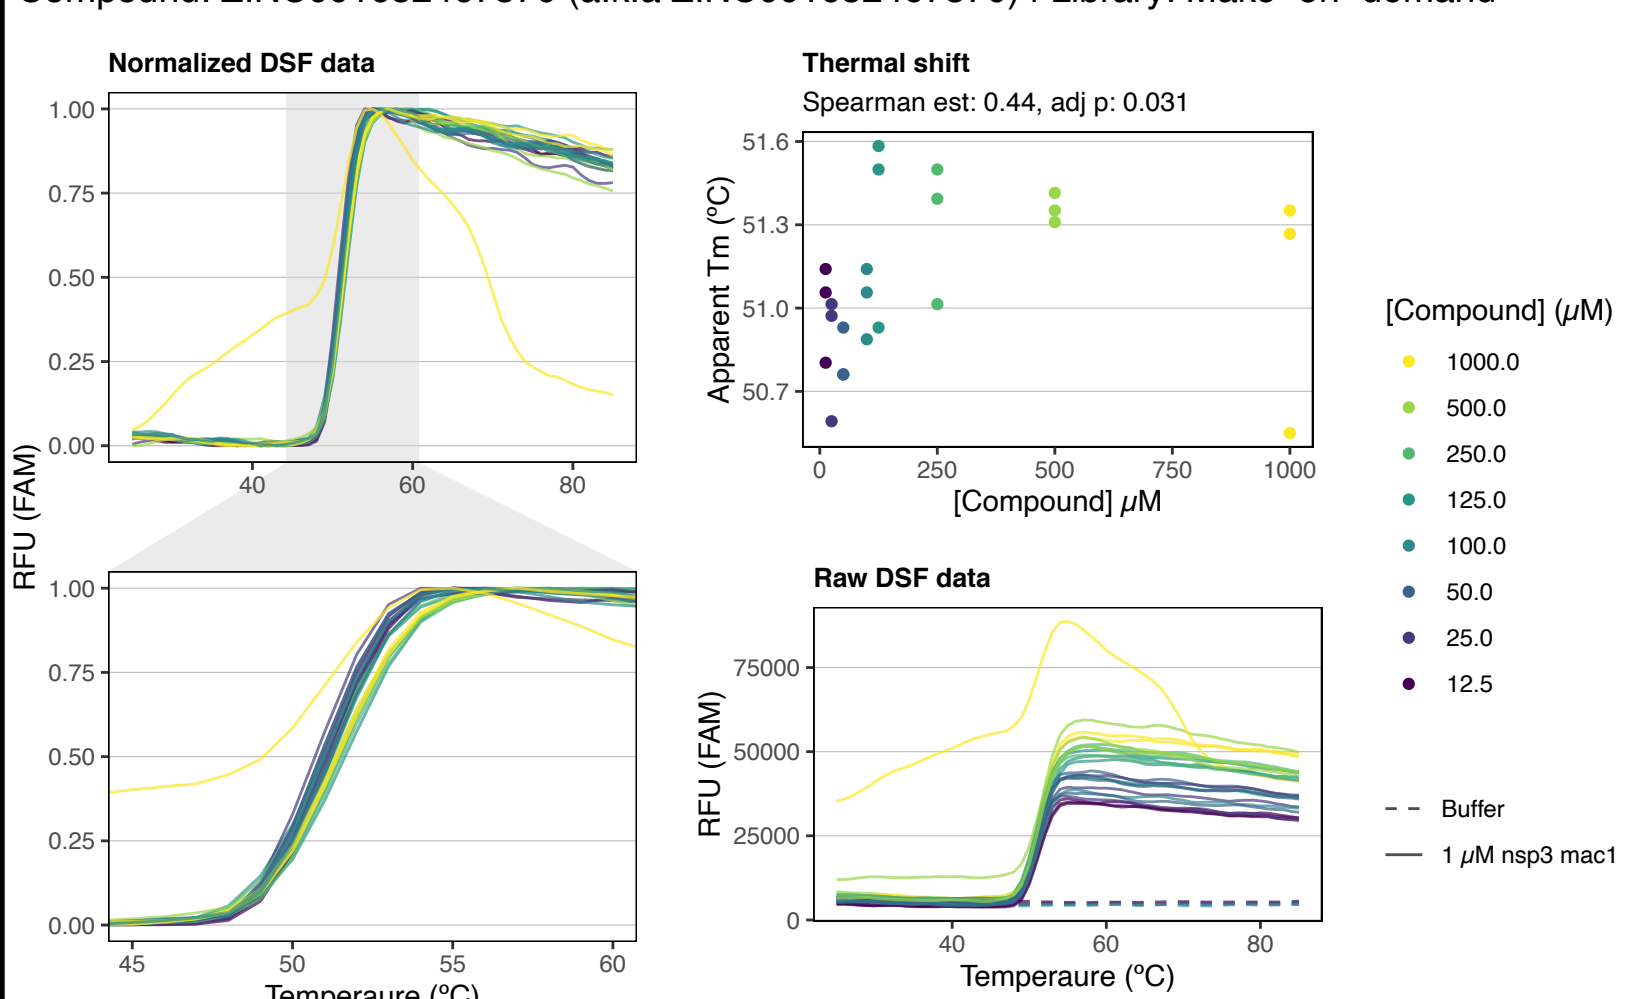

Compound: Z1082933628 (a.k.a Z1082933628) | Library: Merger-order-1

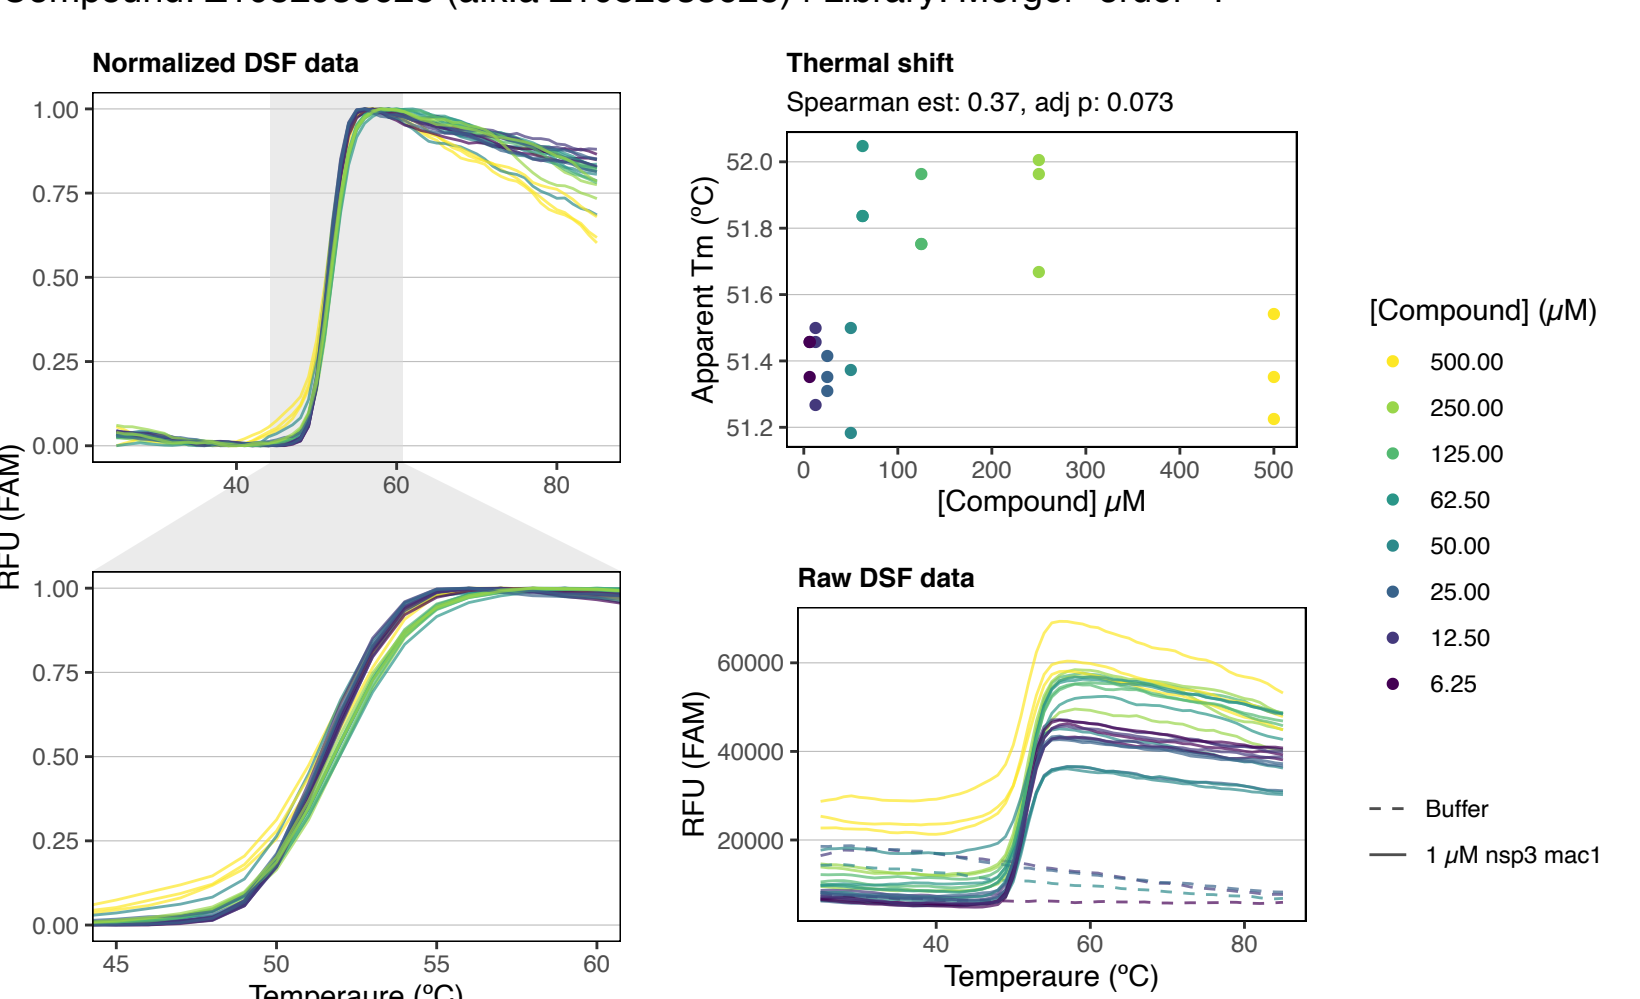

Compound: Z4574659604 (a.k.a Z4574659604) | Library: Merger-order-1

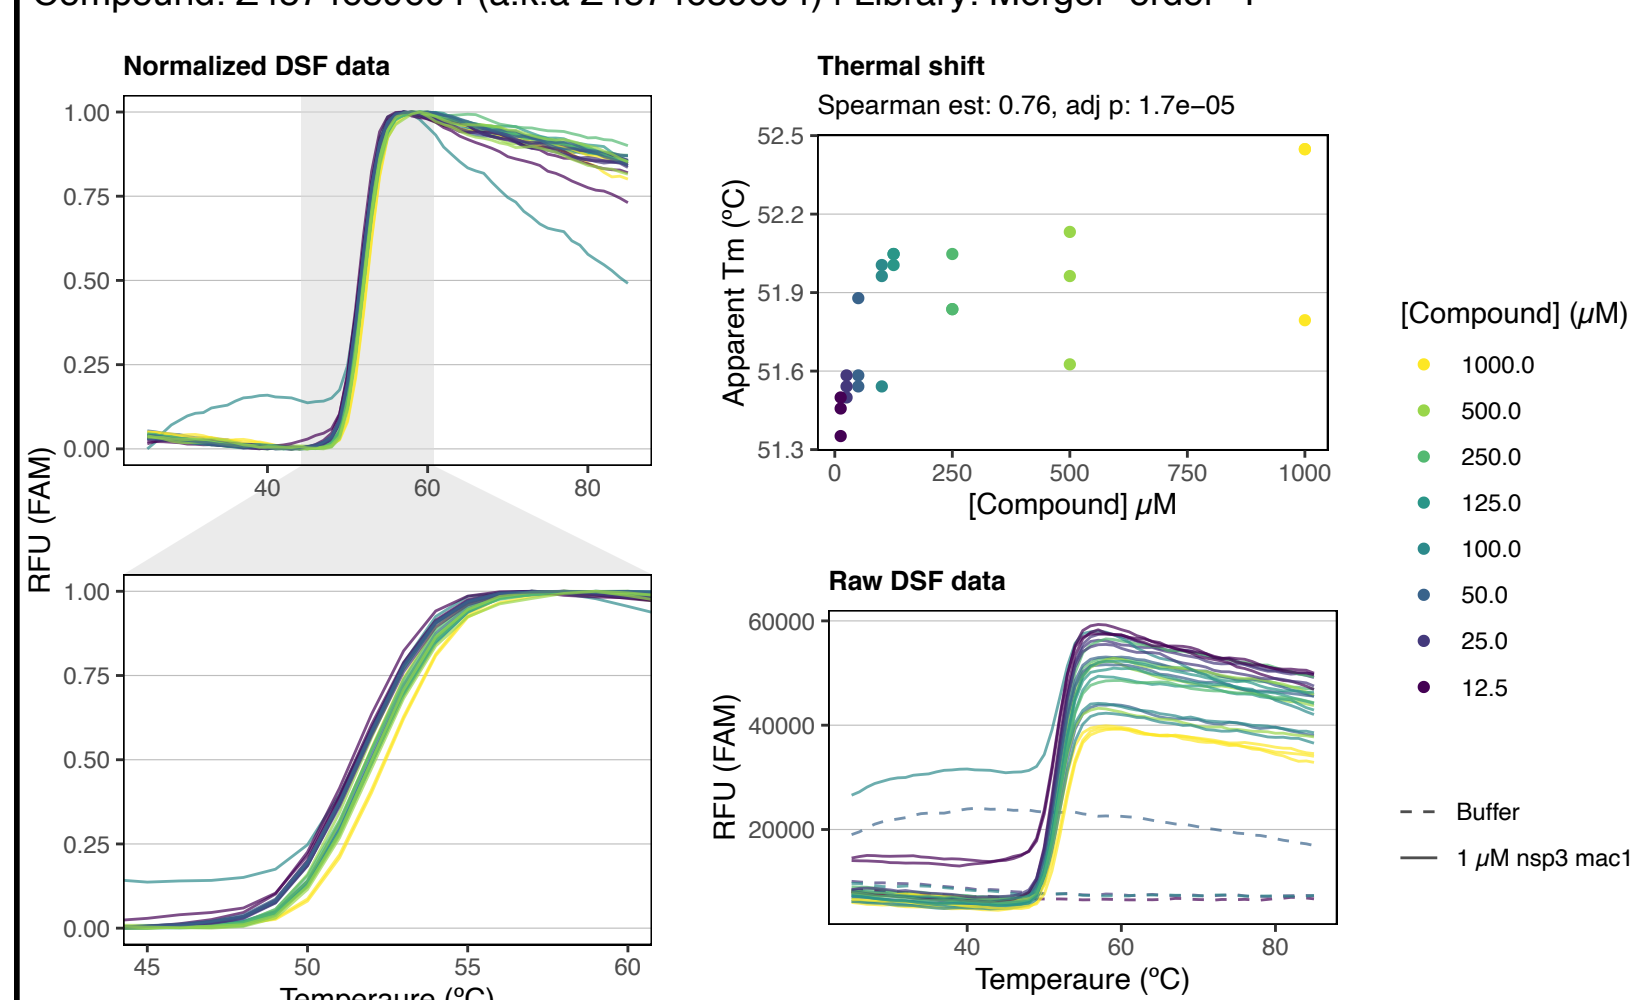

Compound: Z4718398515 (a.k.a Z4718398515) | Library: Merger-order-1

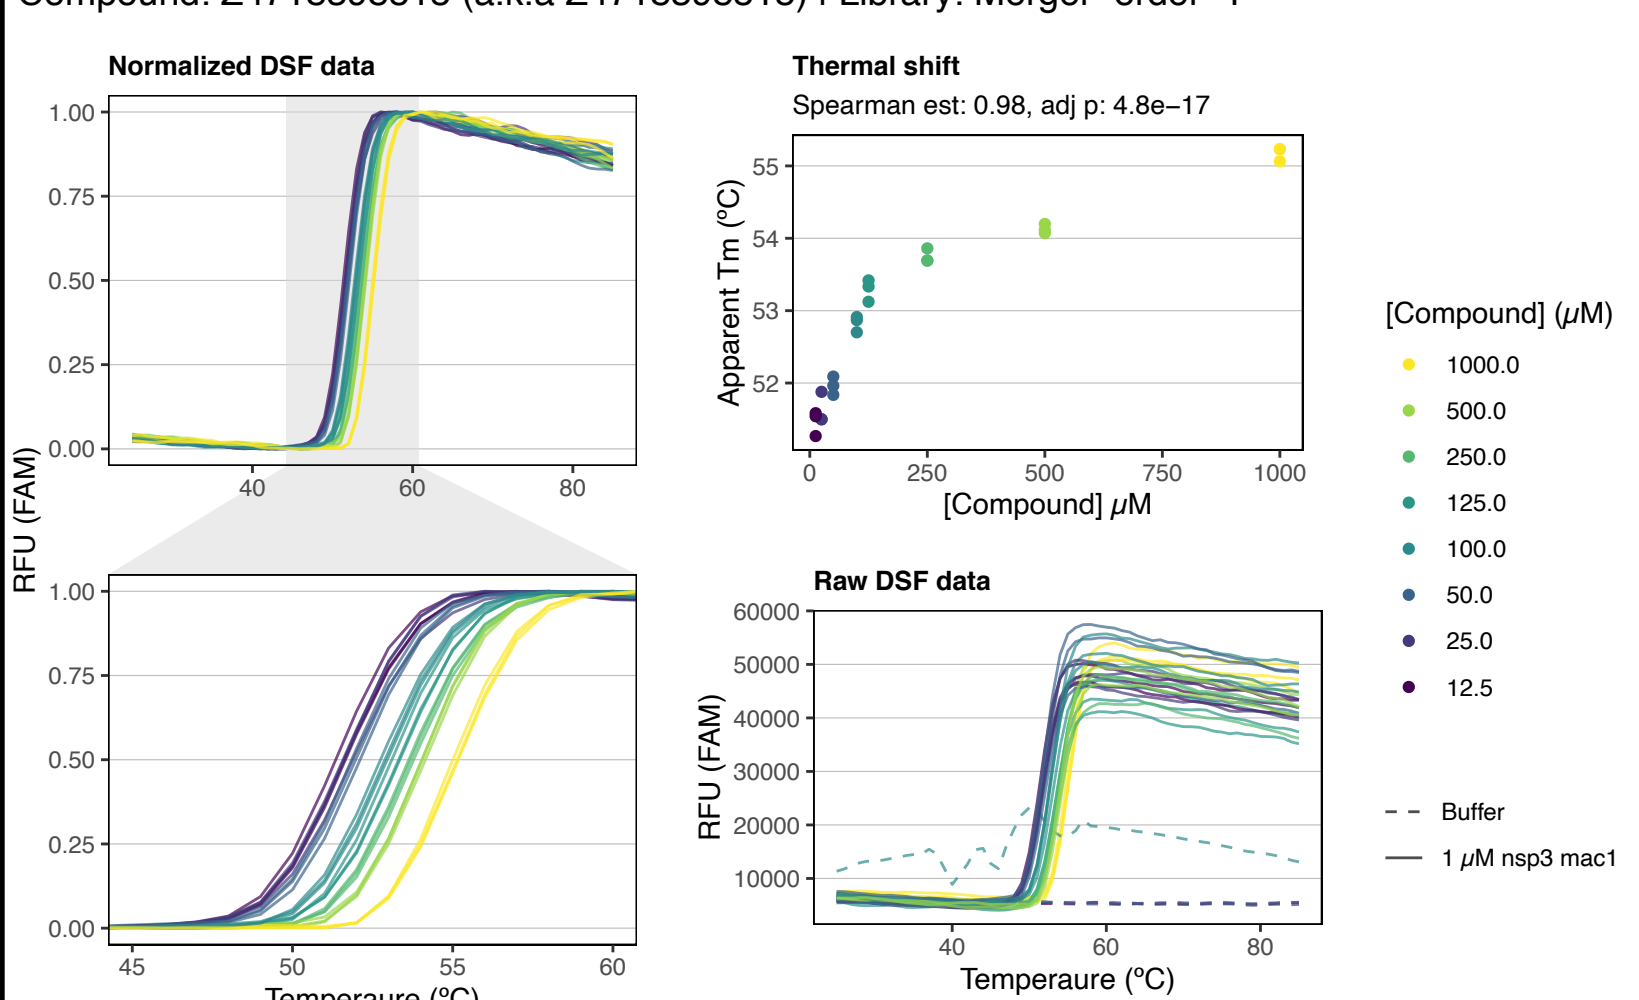

Compound: Z4718398531 (a.k.a Z4718398531) | Library: Merger-order-1

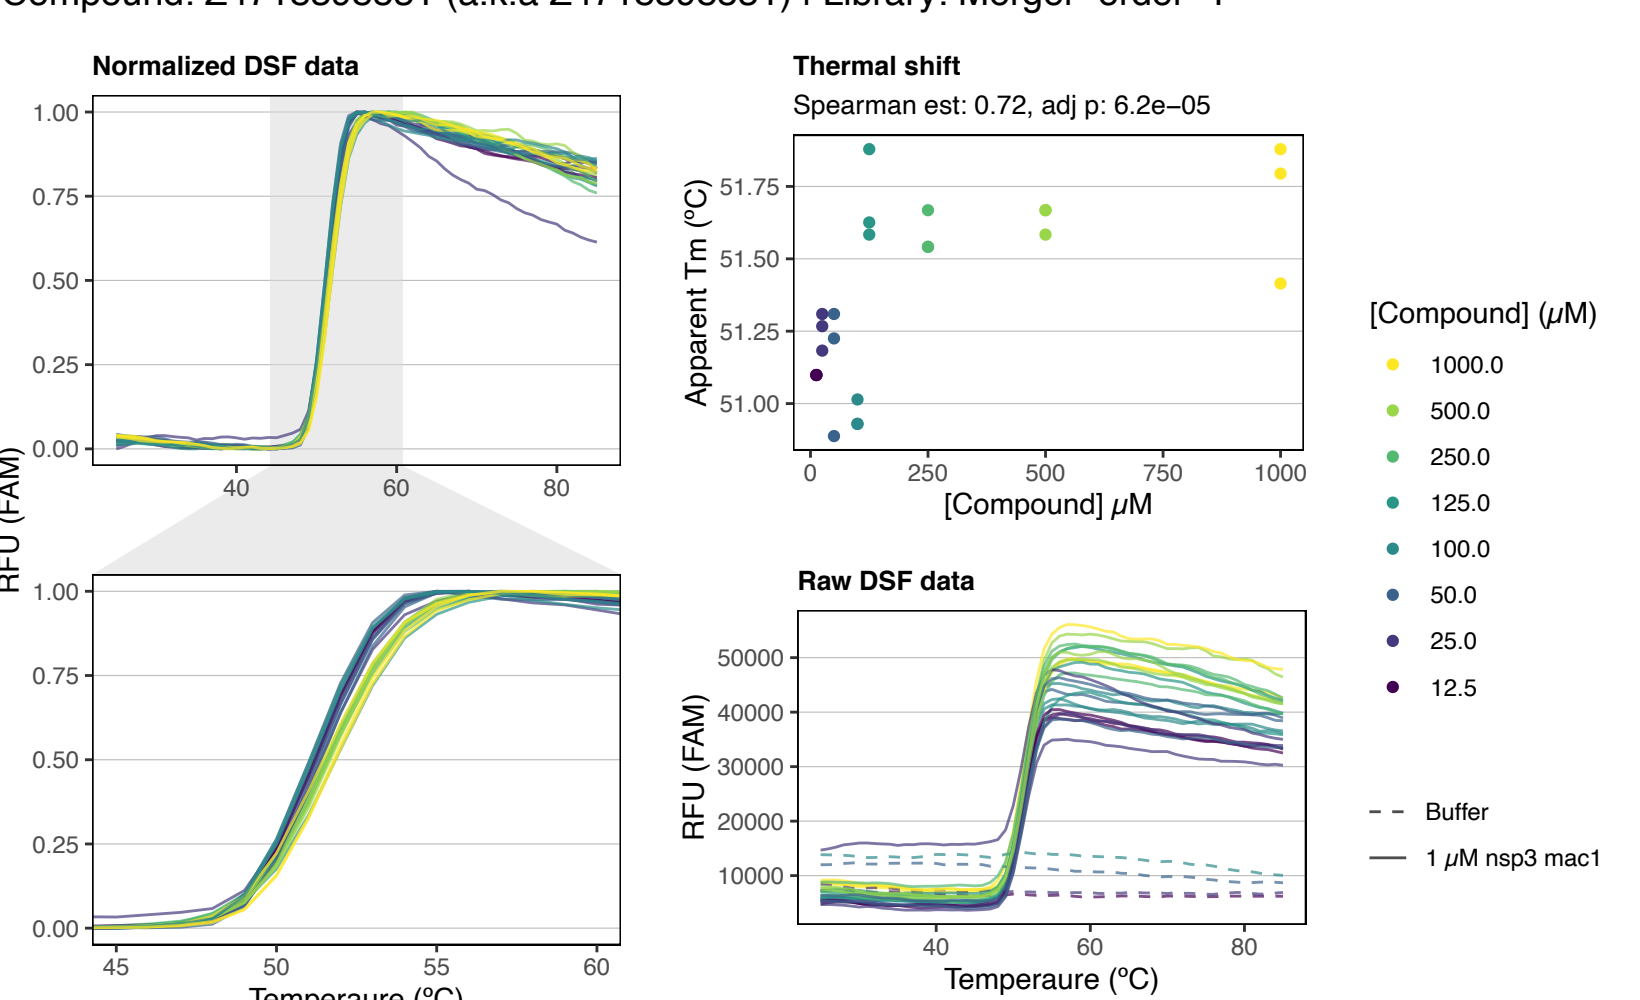

Compound: Z4718398539 (a.k.a Z4718398539) | Library: Merger-order-1

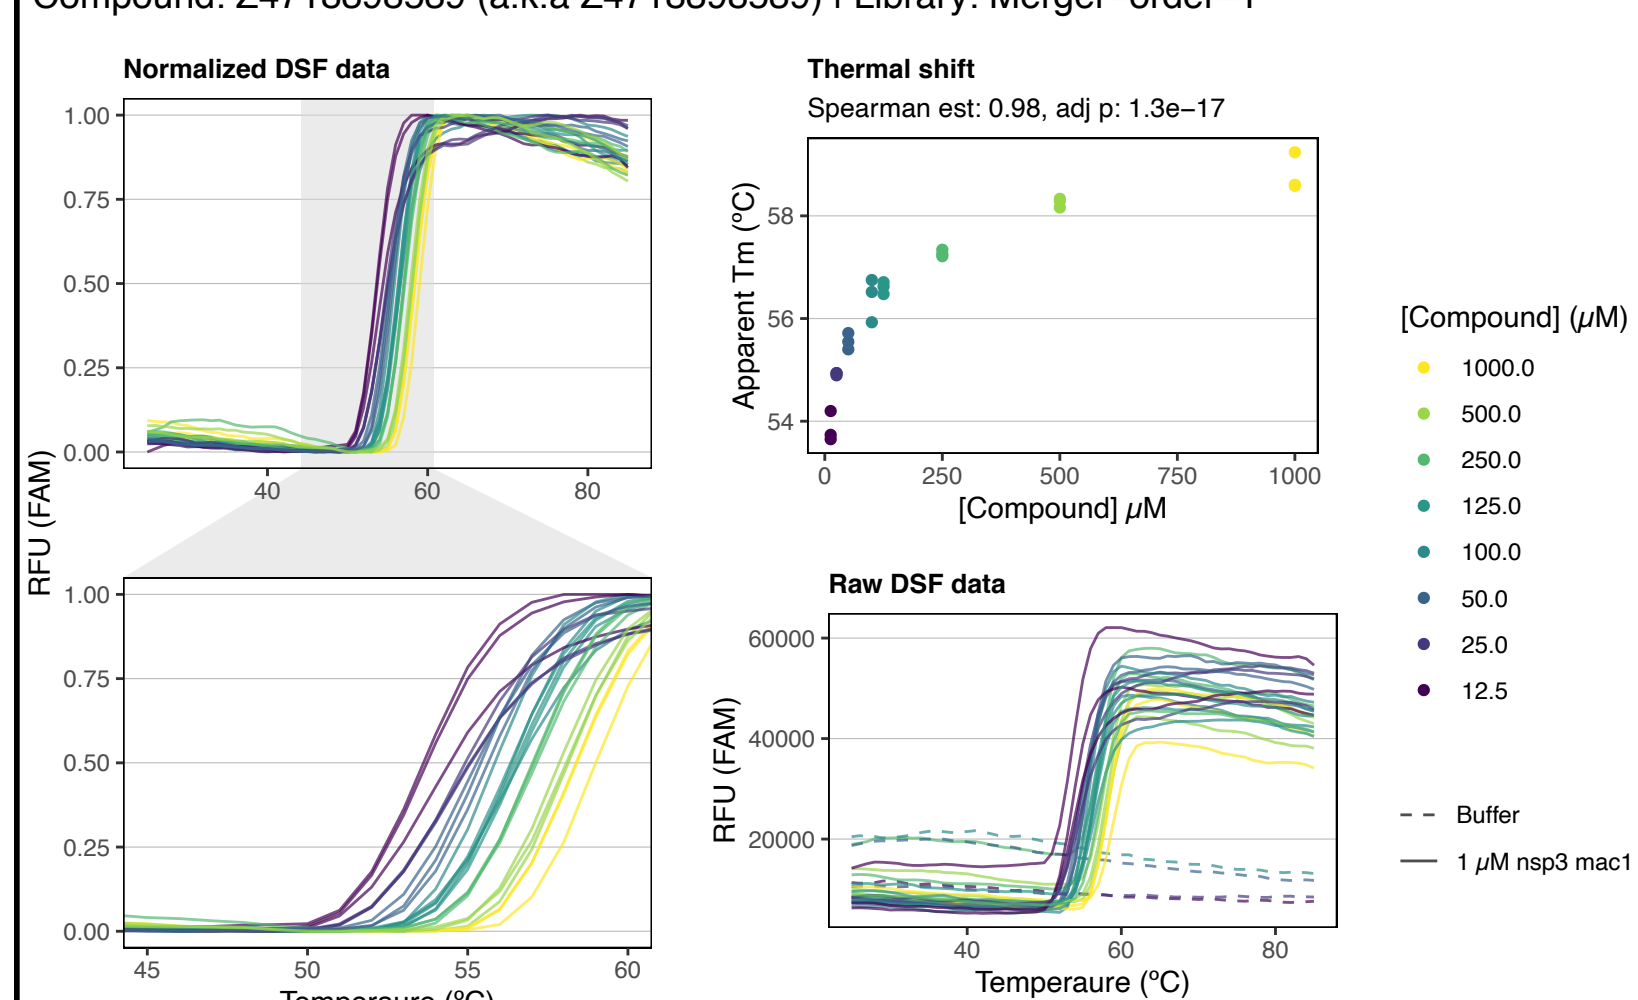

Compound: Z4718398554 (a.k.a Z4718398554) | Library: Merger-order-1

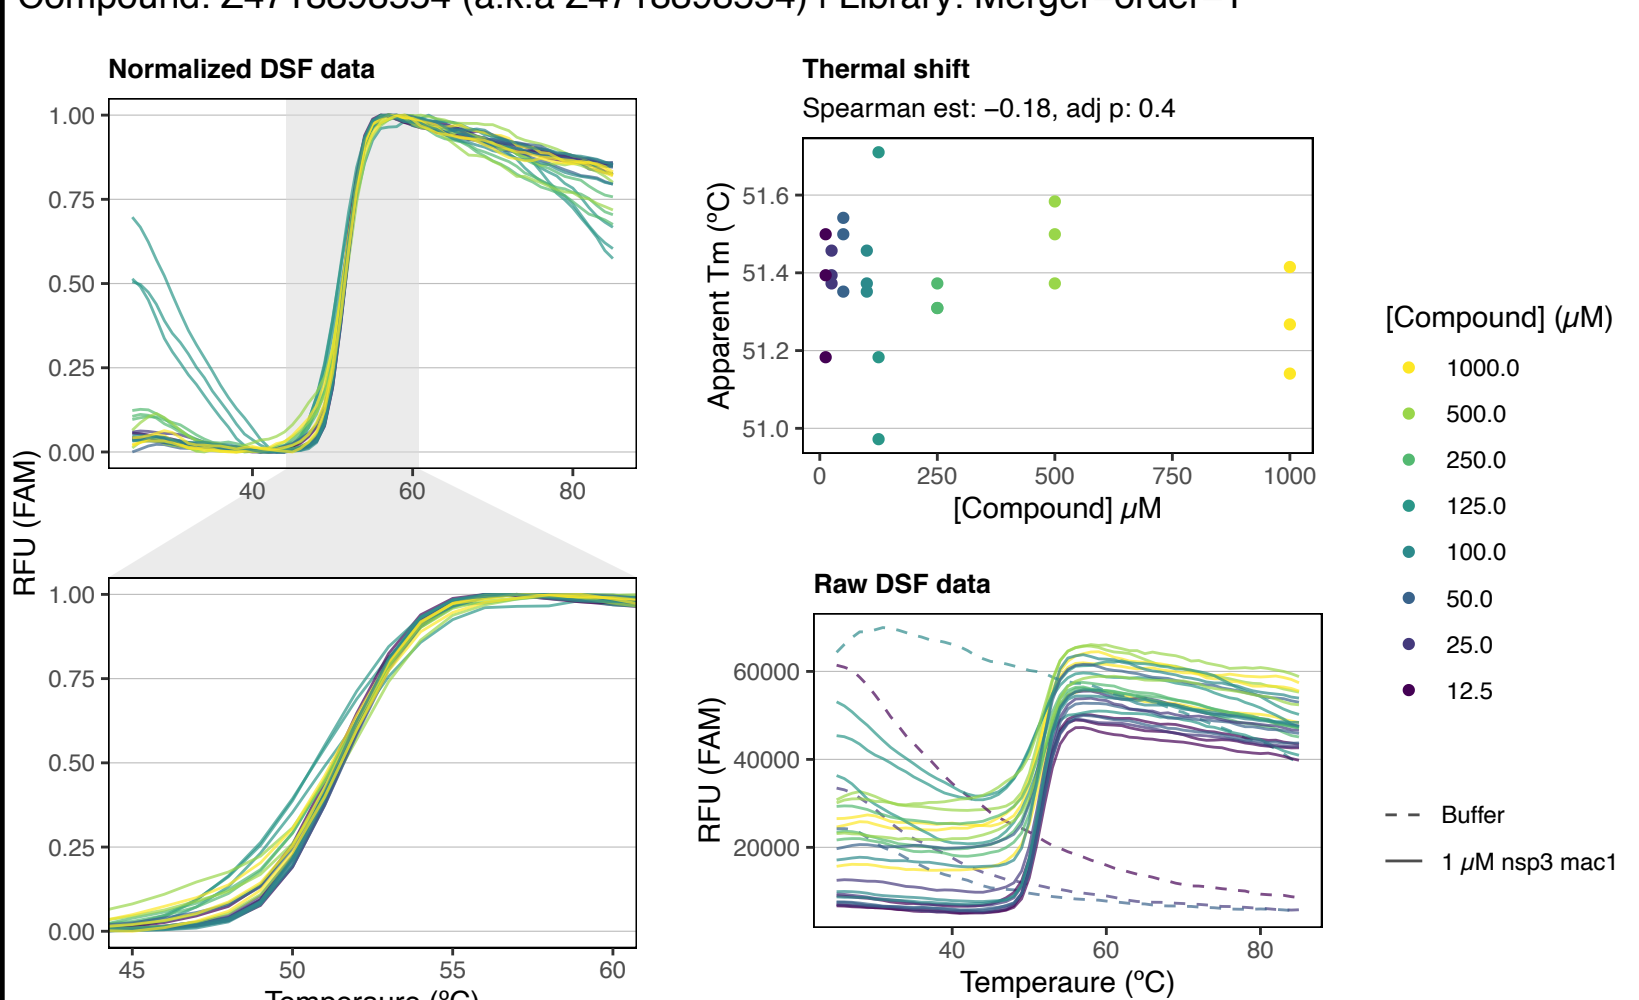

Compound: Z4718398569 (a.k.a Z4718398569) | Library: Merger-order-1

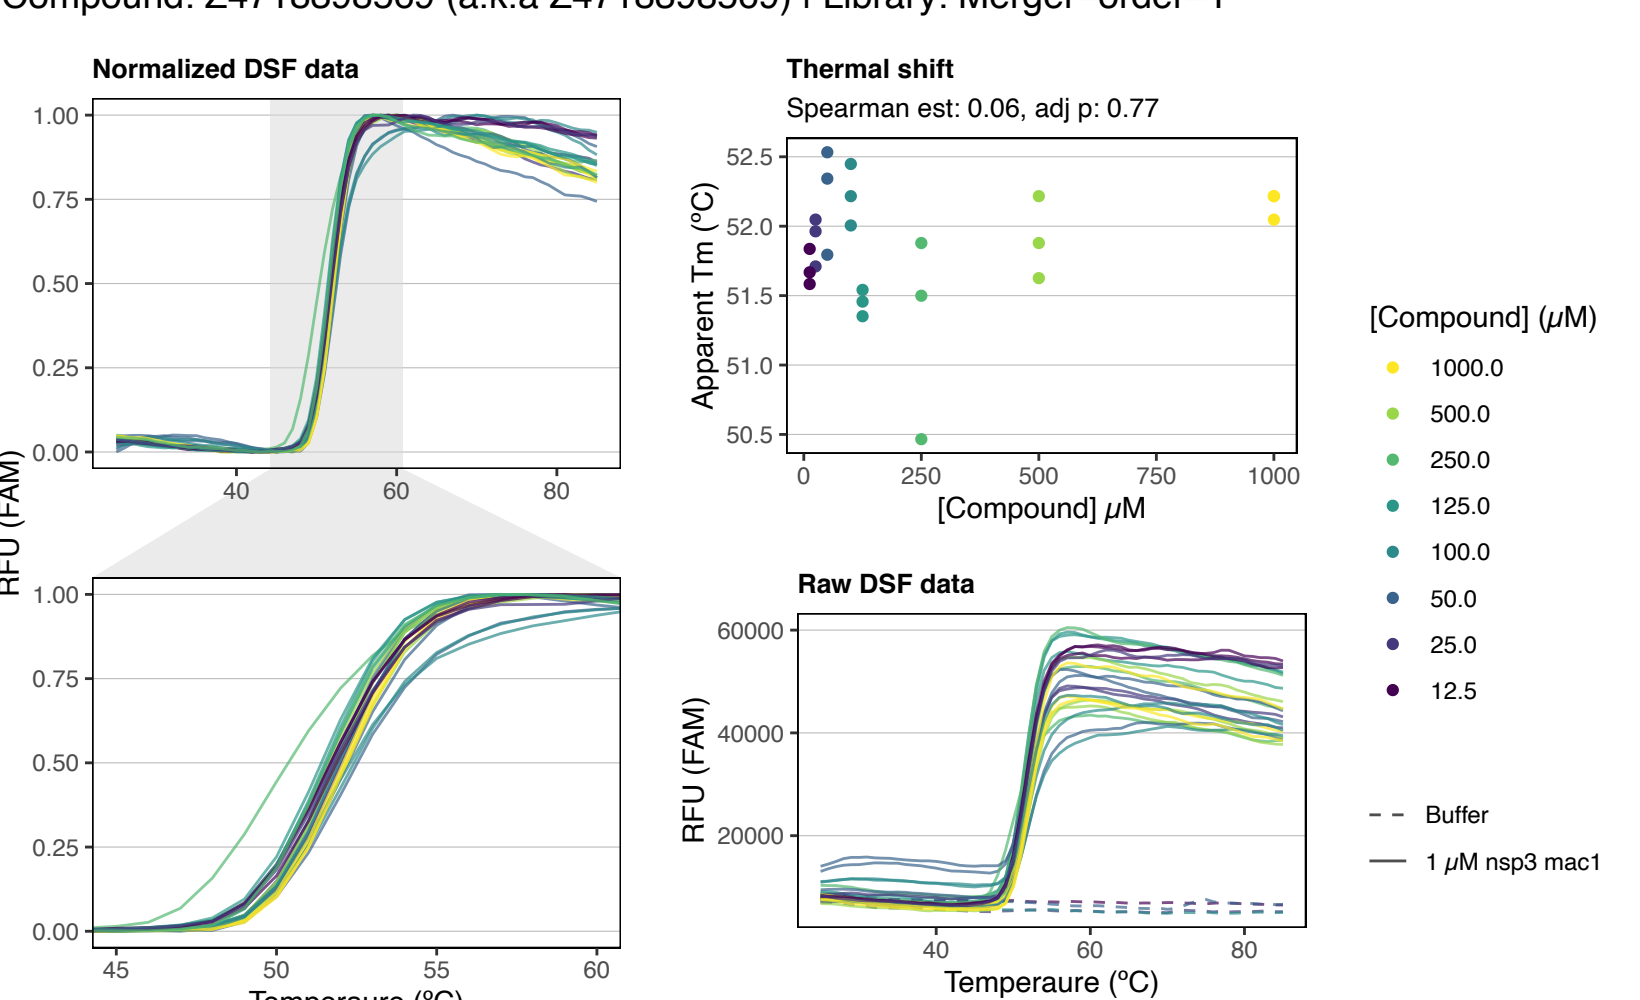

Compound: Z4718398572 (a.k.a Z4718398572) | Library: Merger-order-1

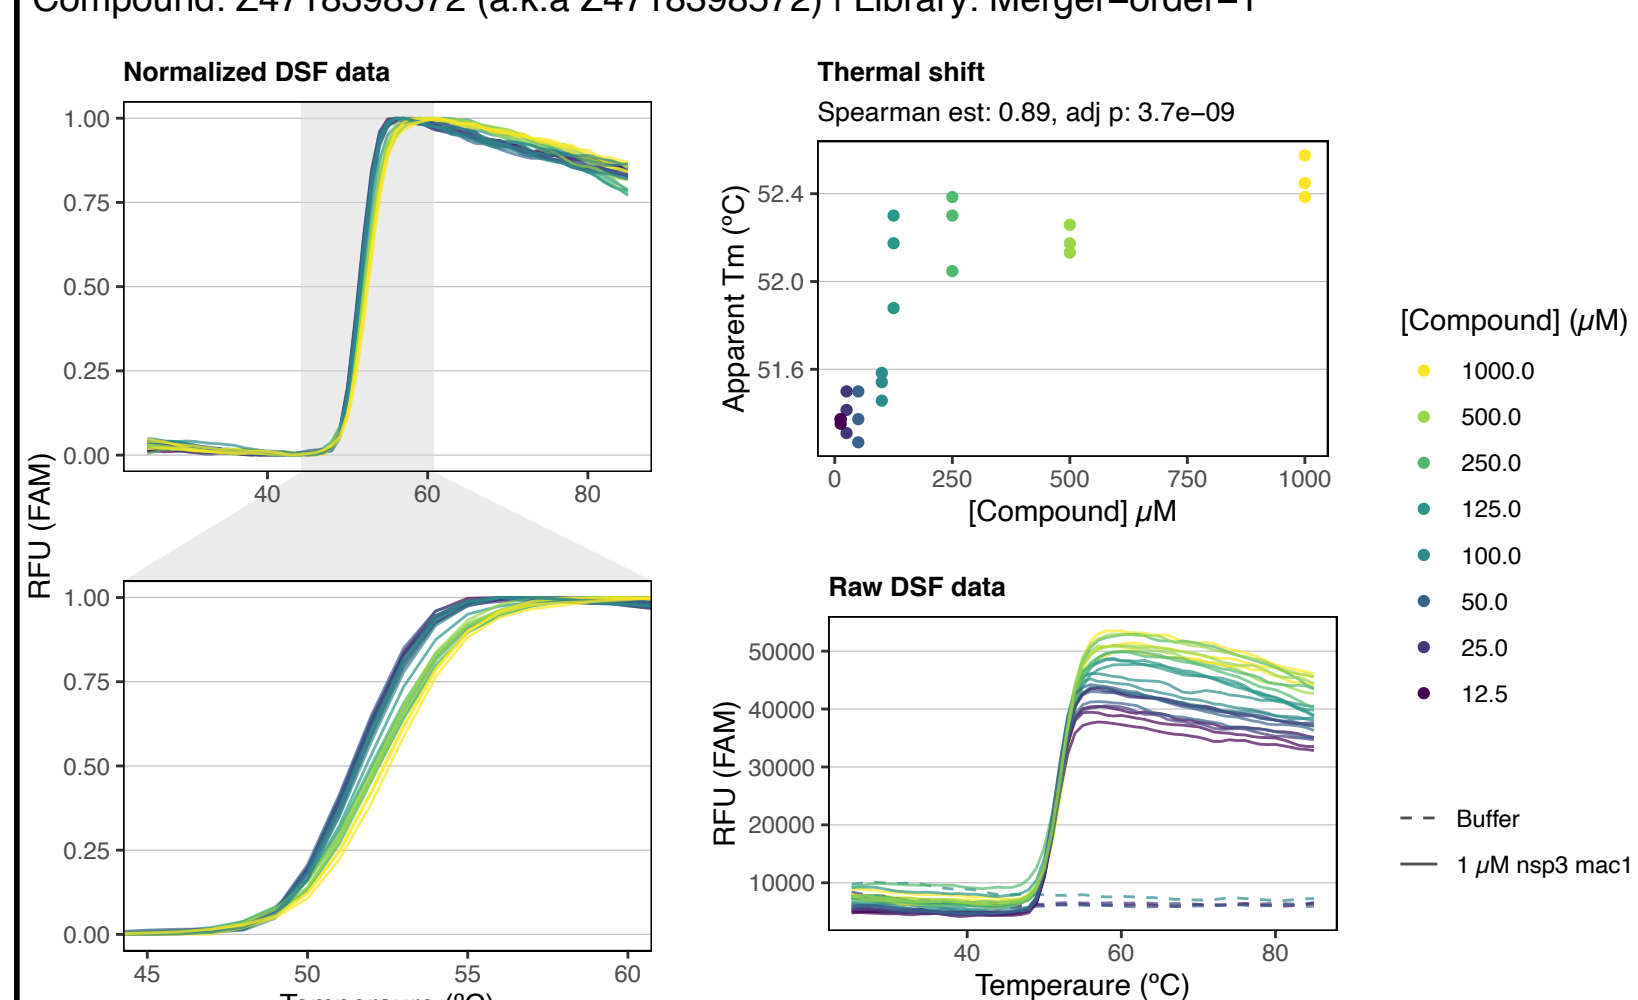

Compound: Z4718398580 (a.k.a Z4718398580) | Library: Merger-order-1

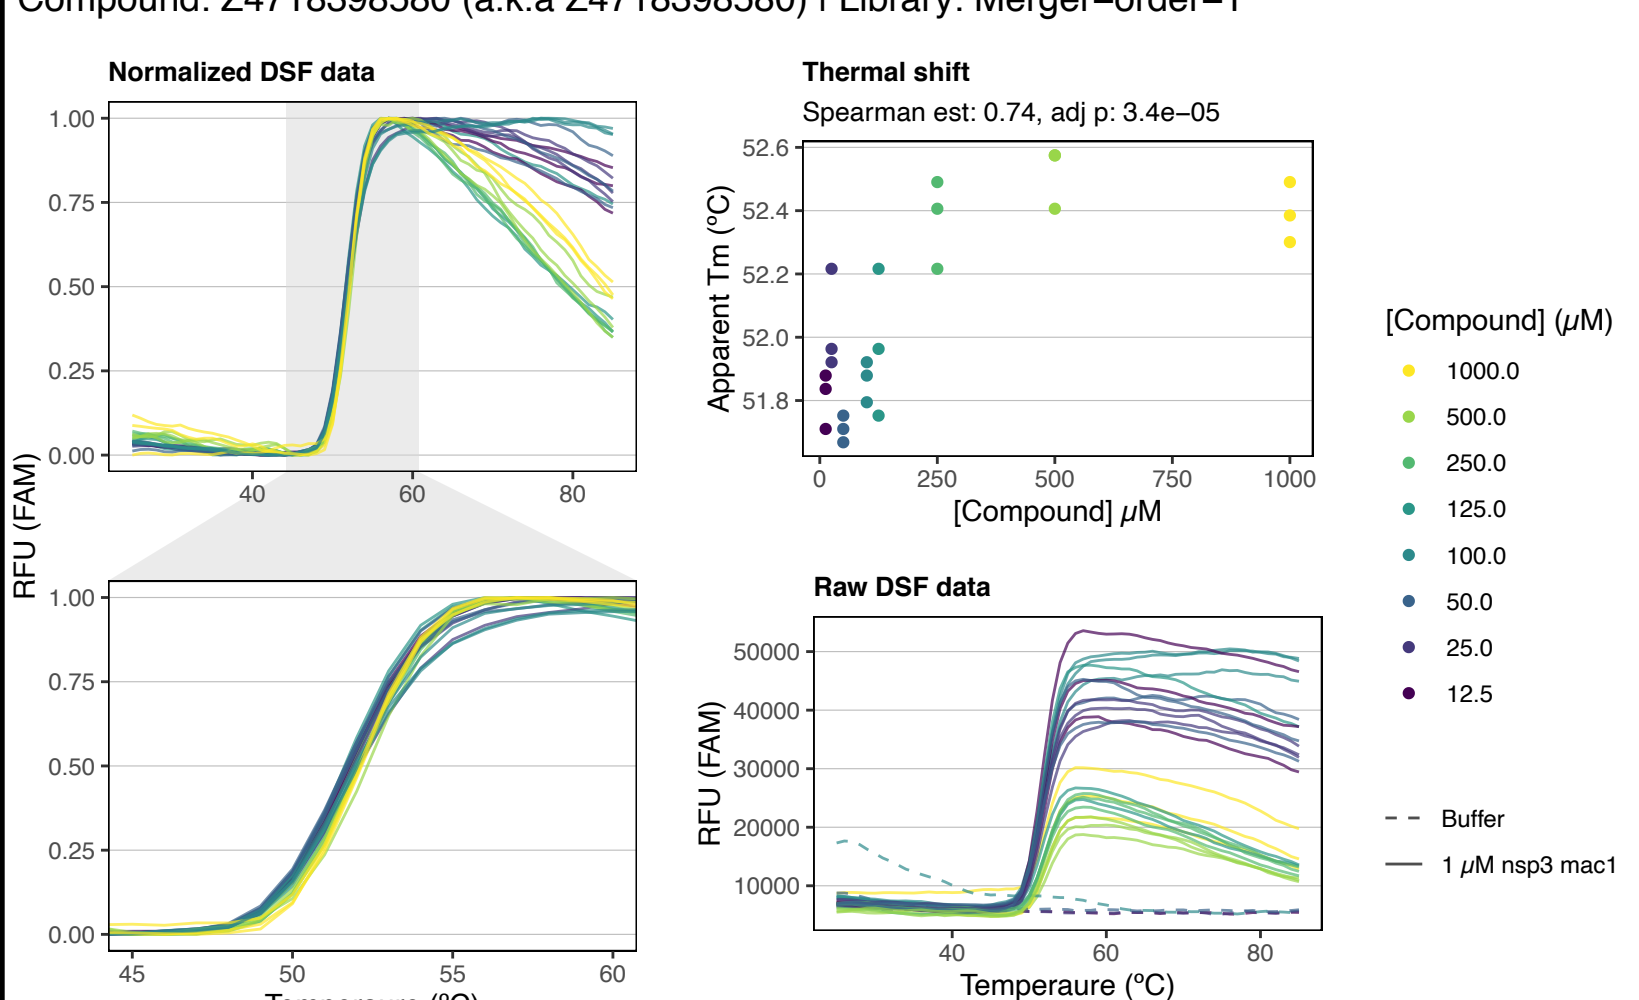

Compound: Z4718398585 (a.k.a Z4718398585) | Library: Merger-order-1

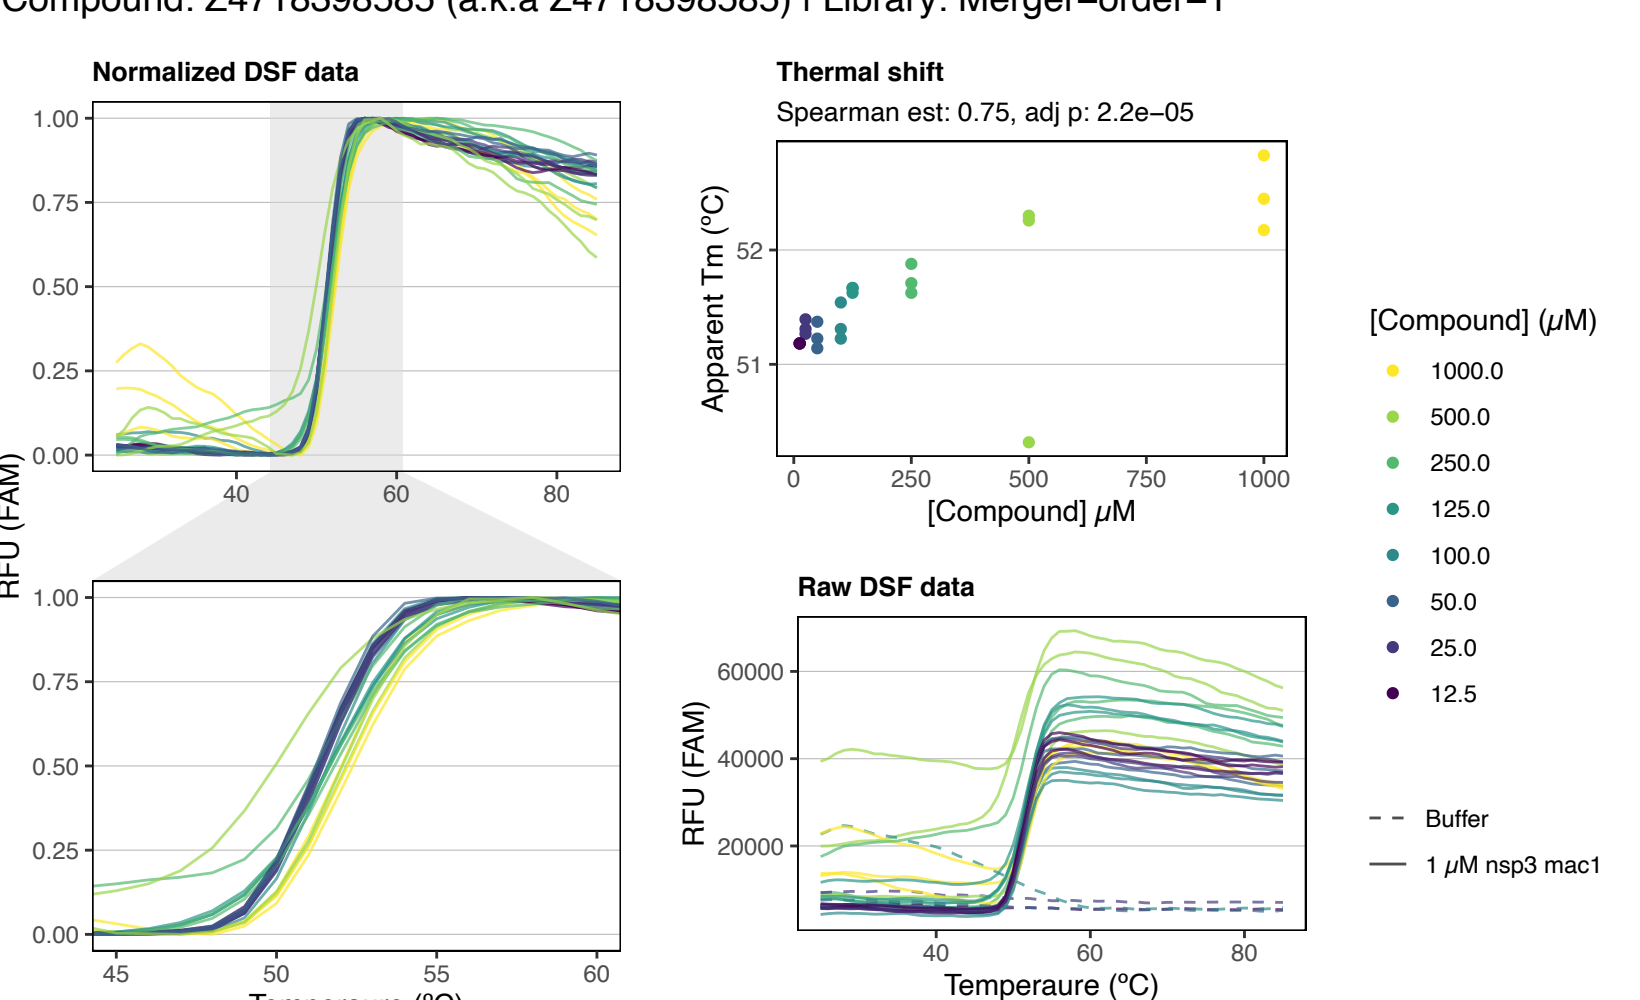

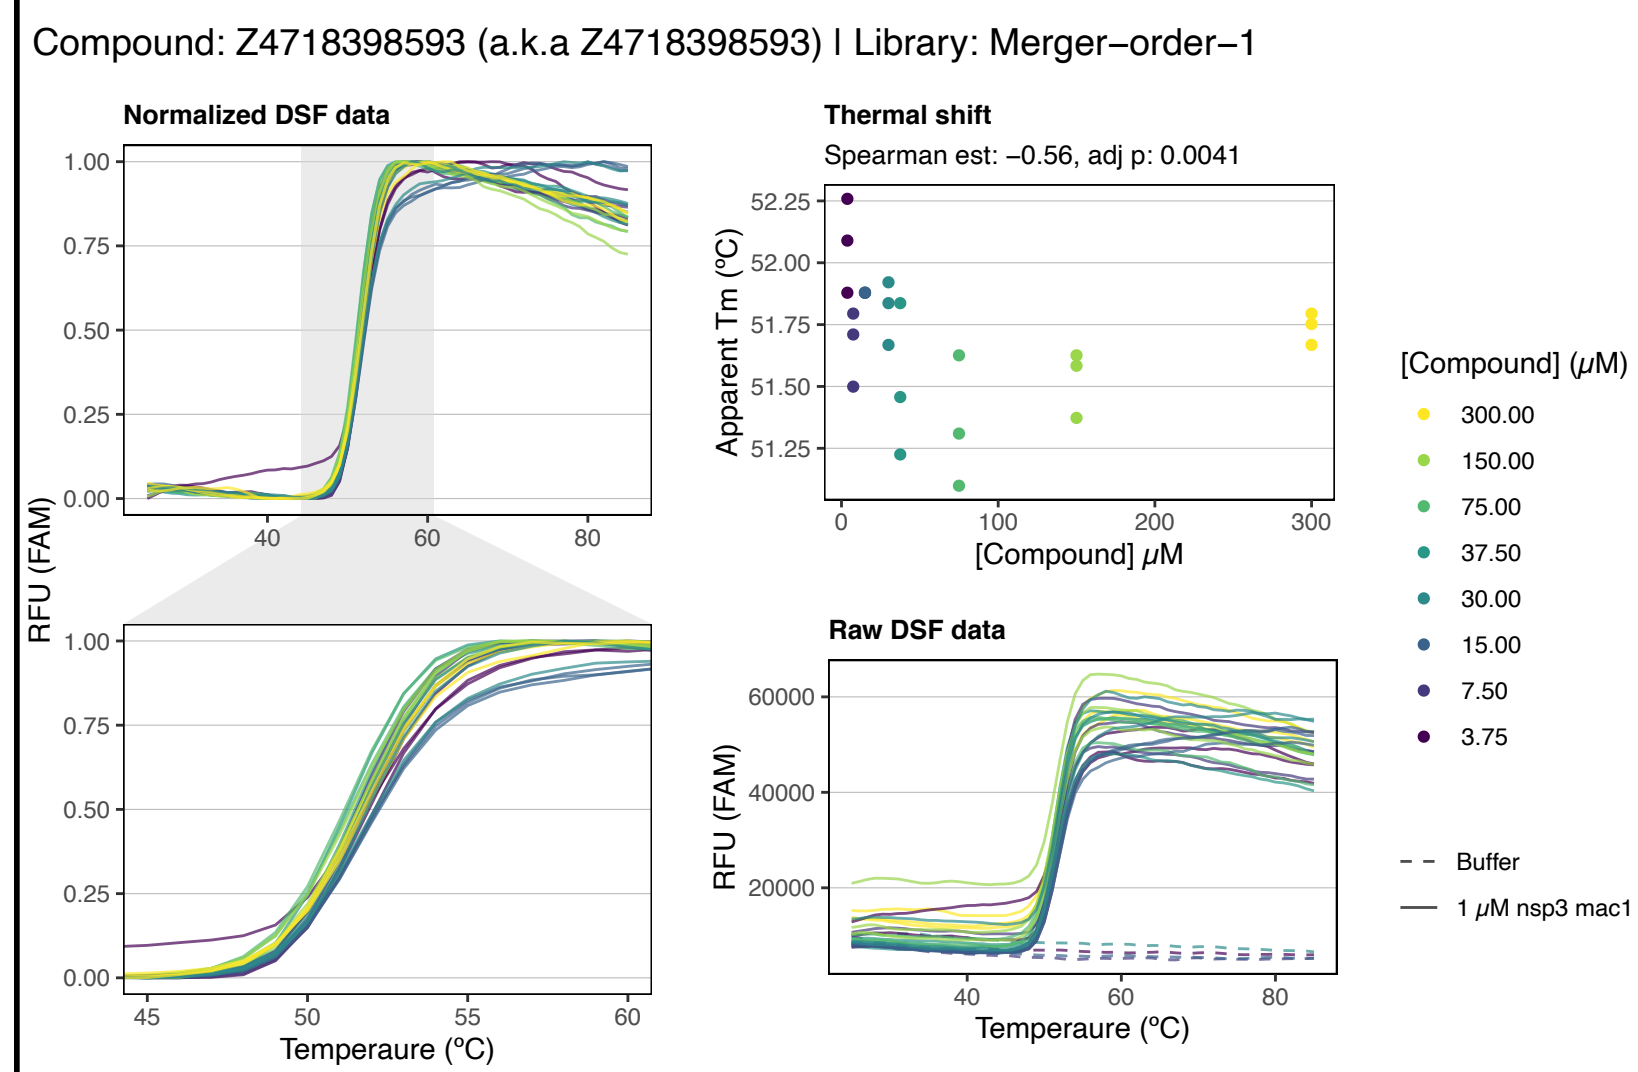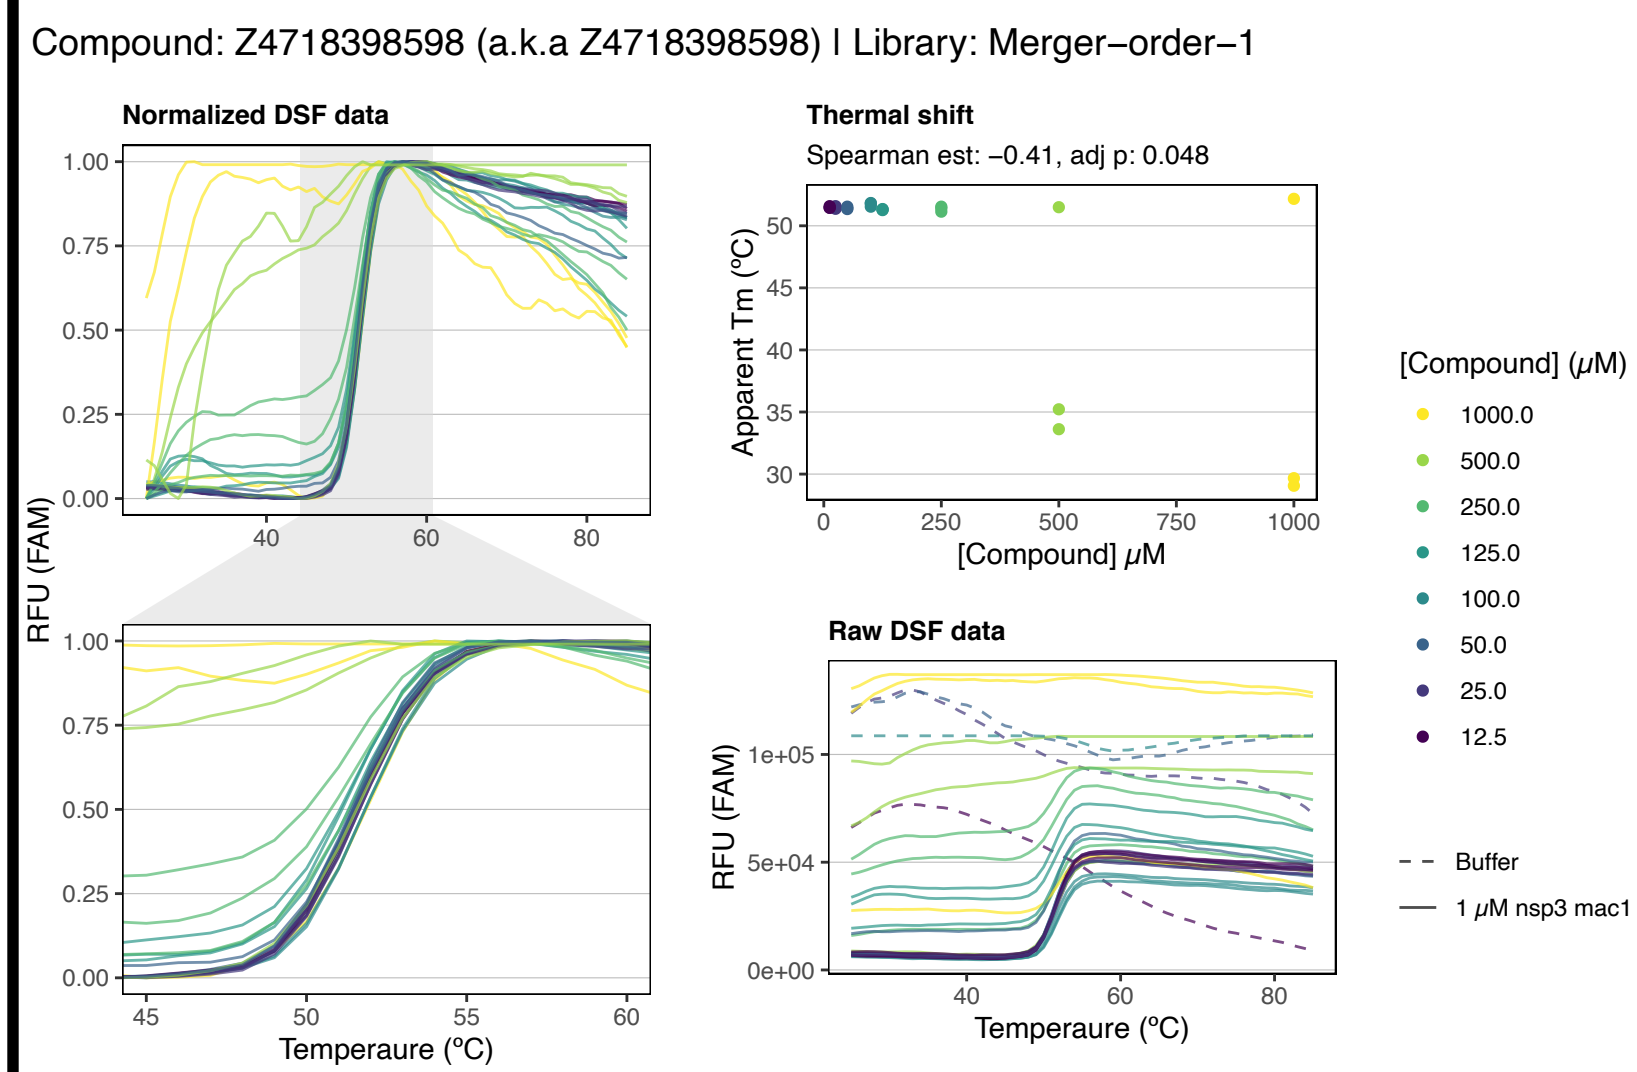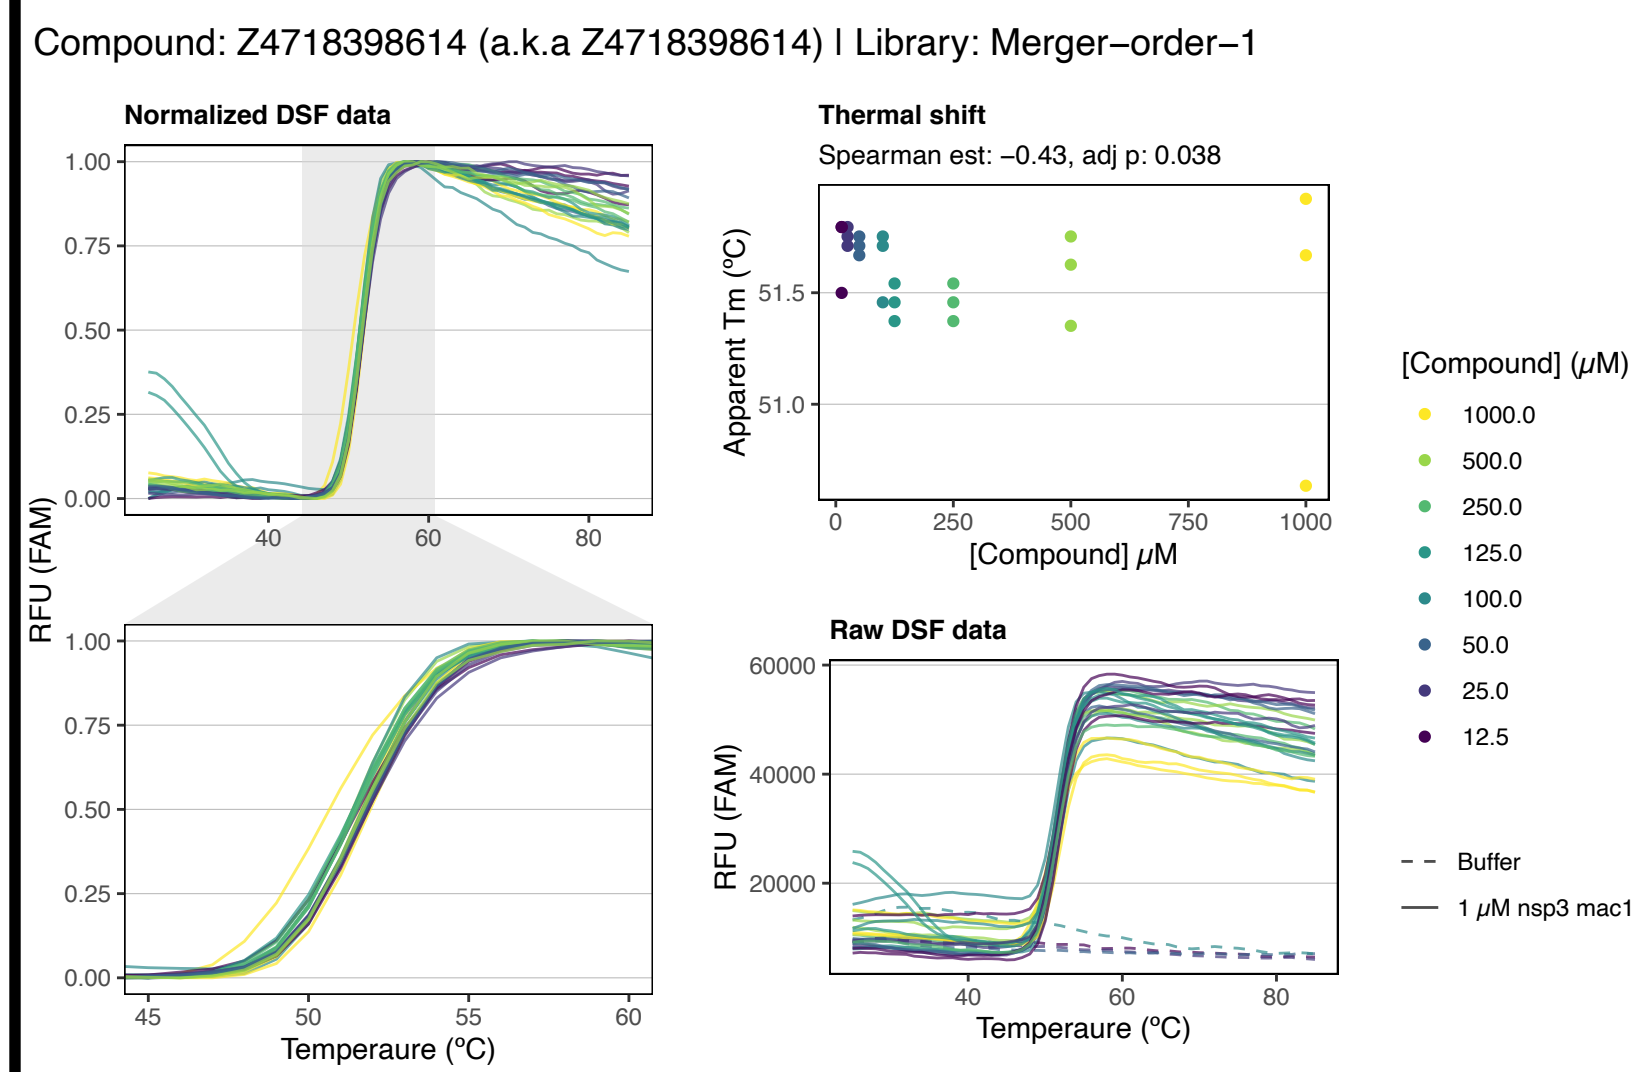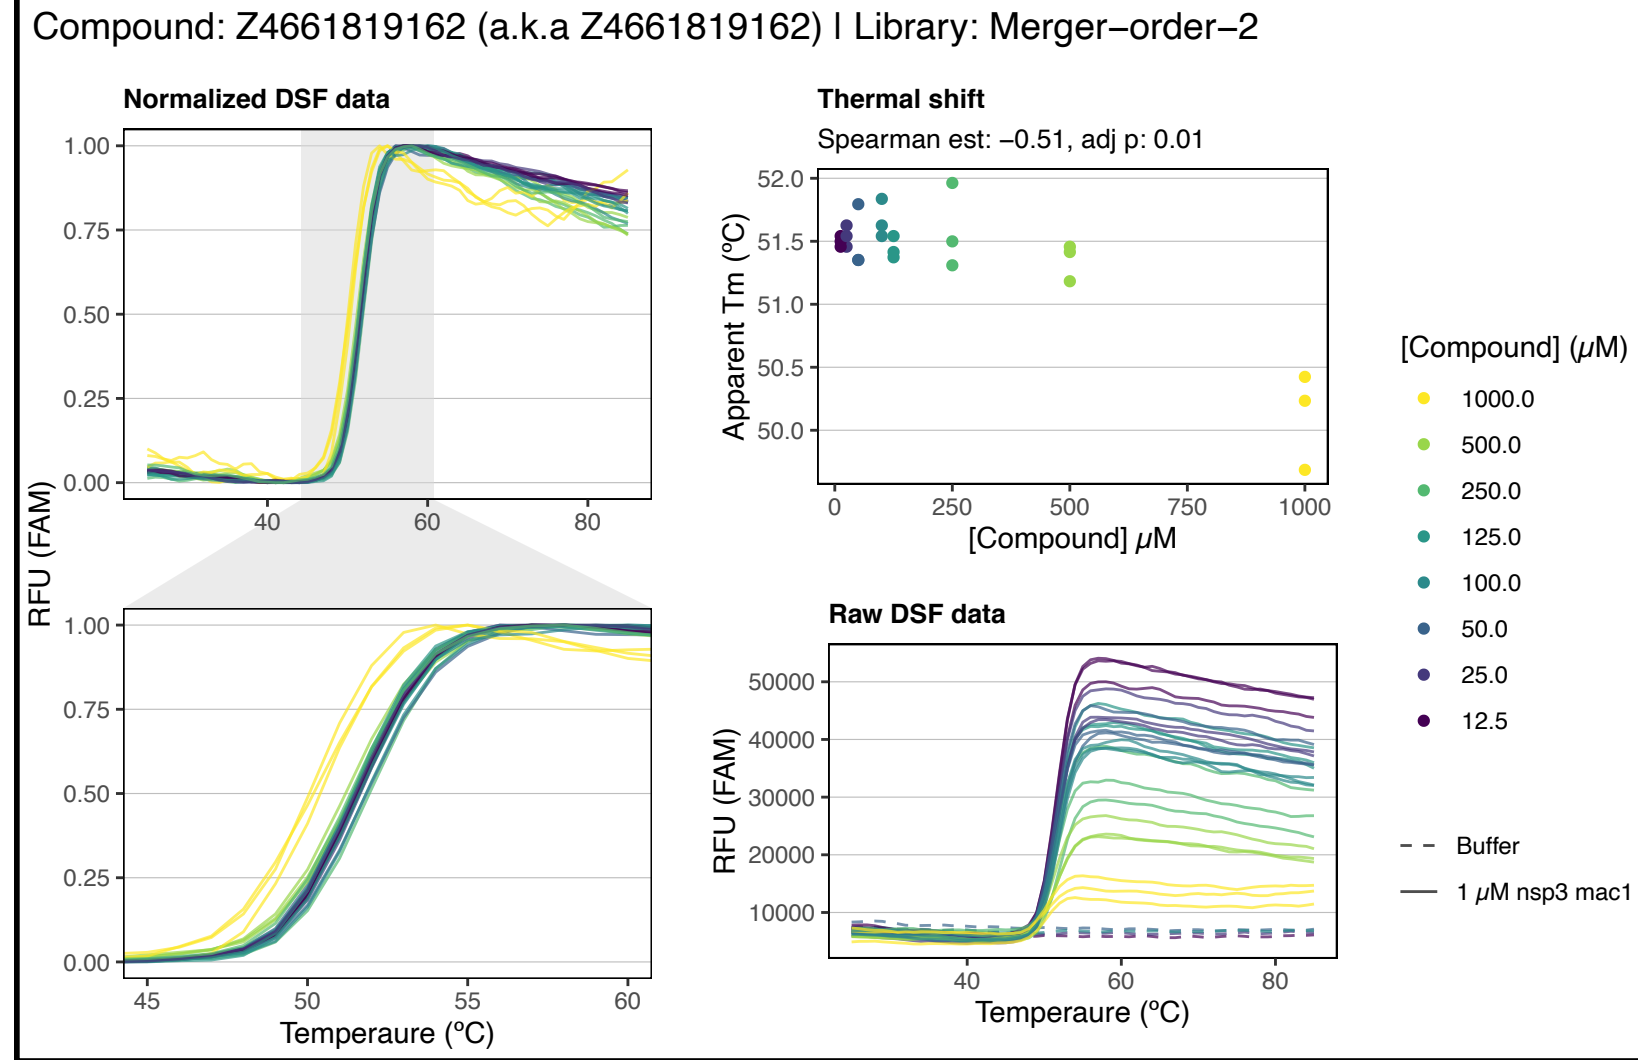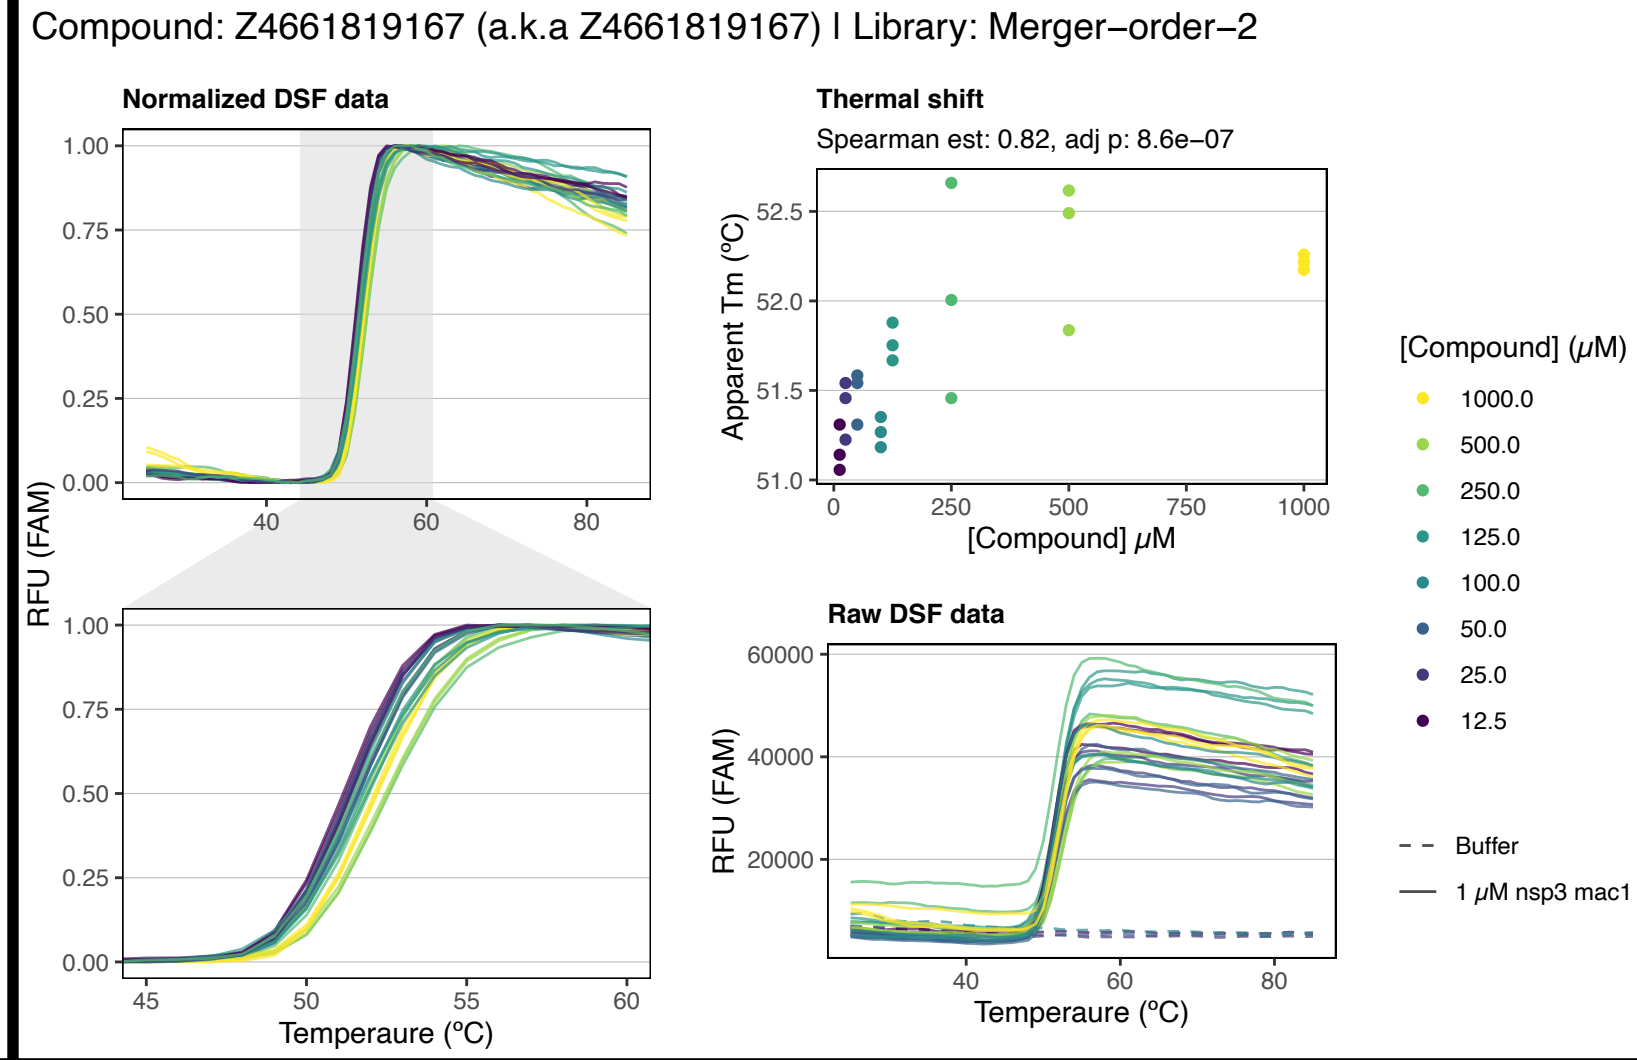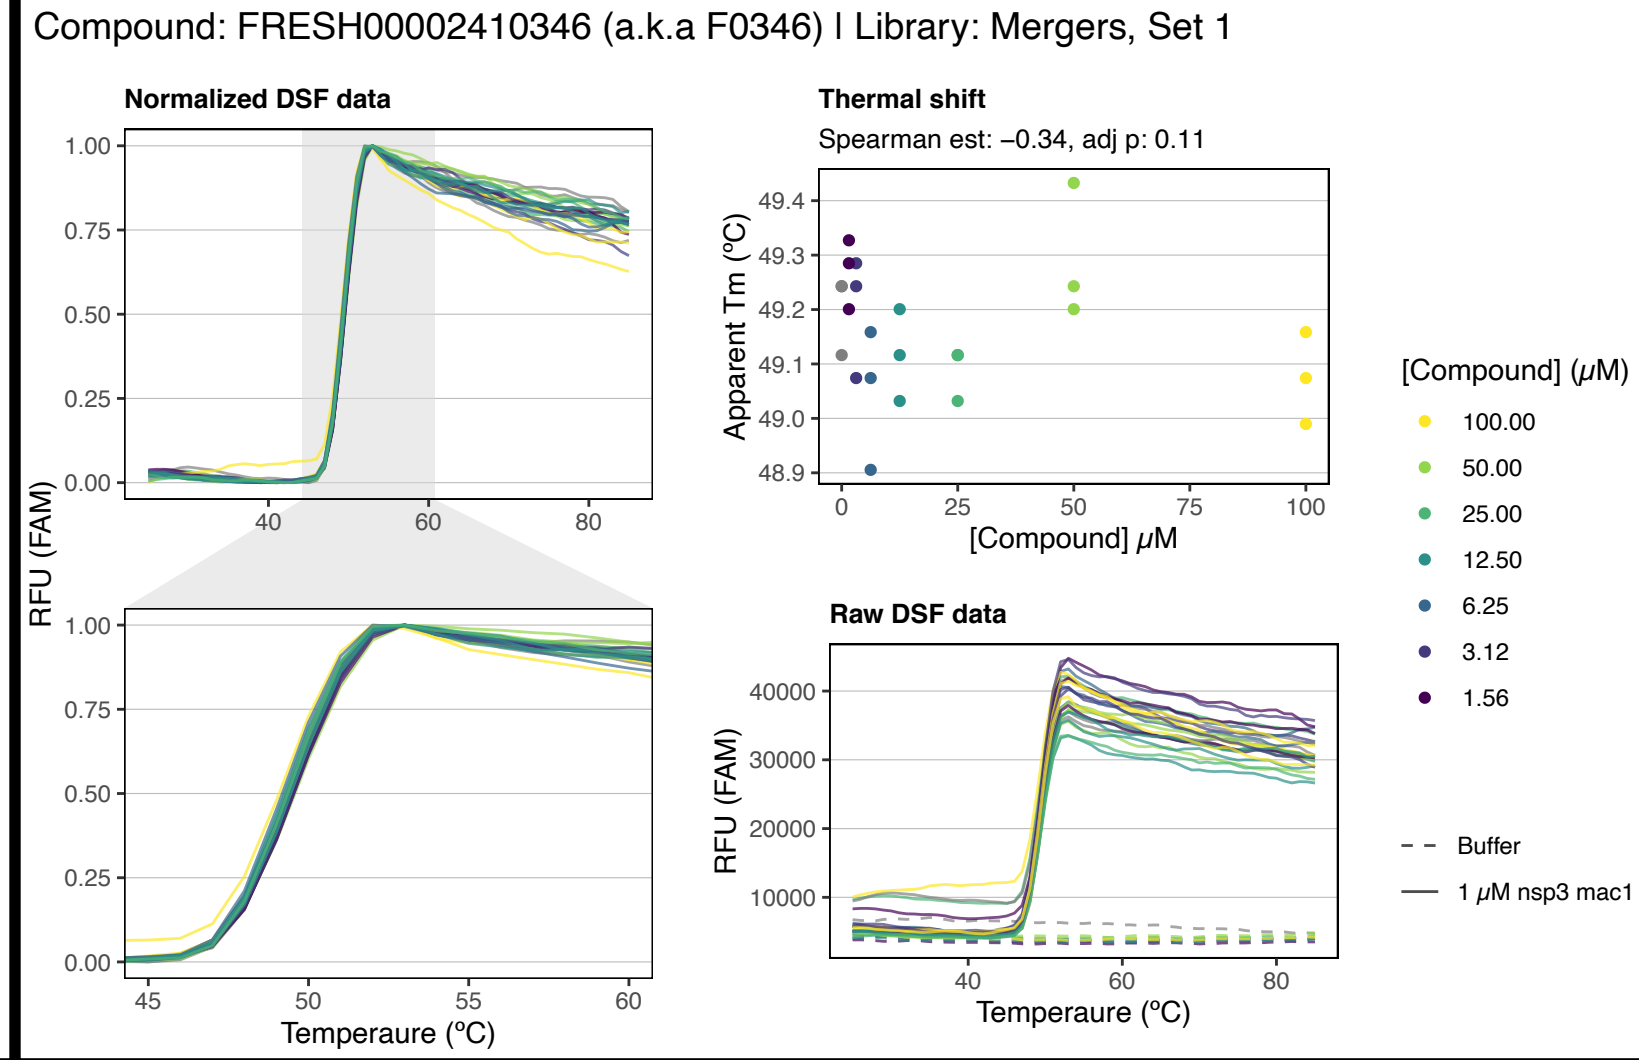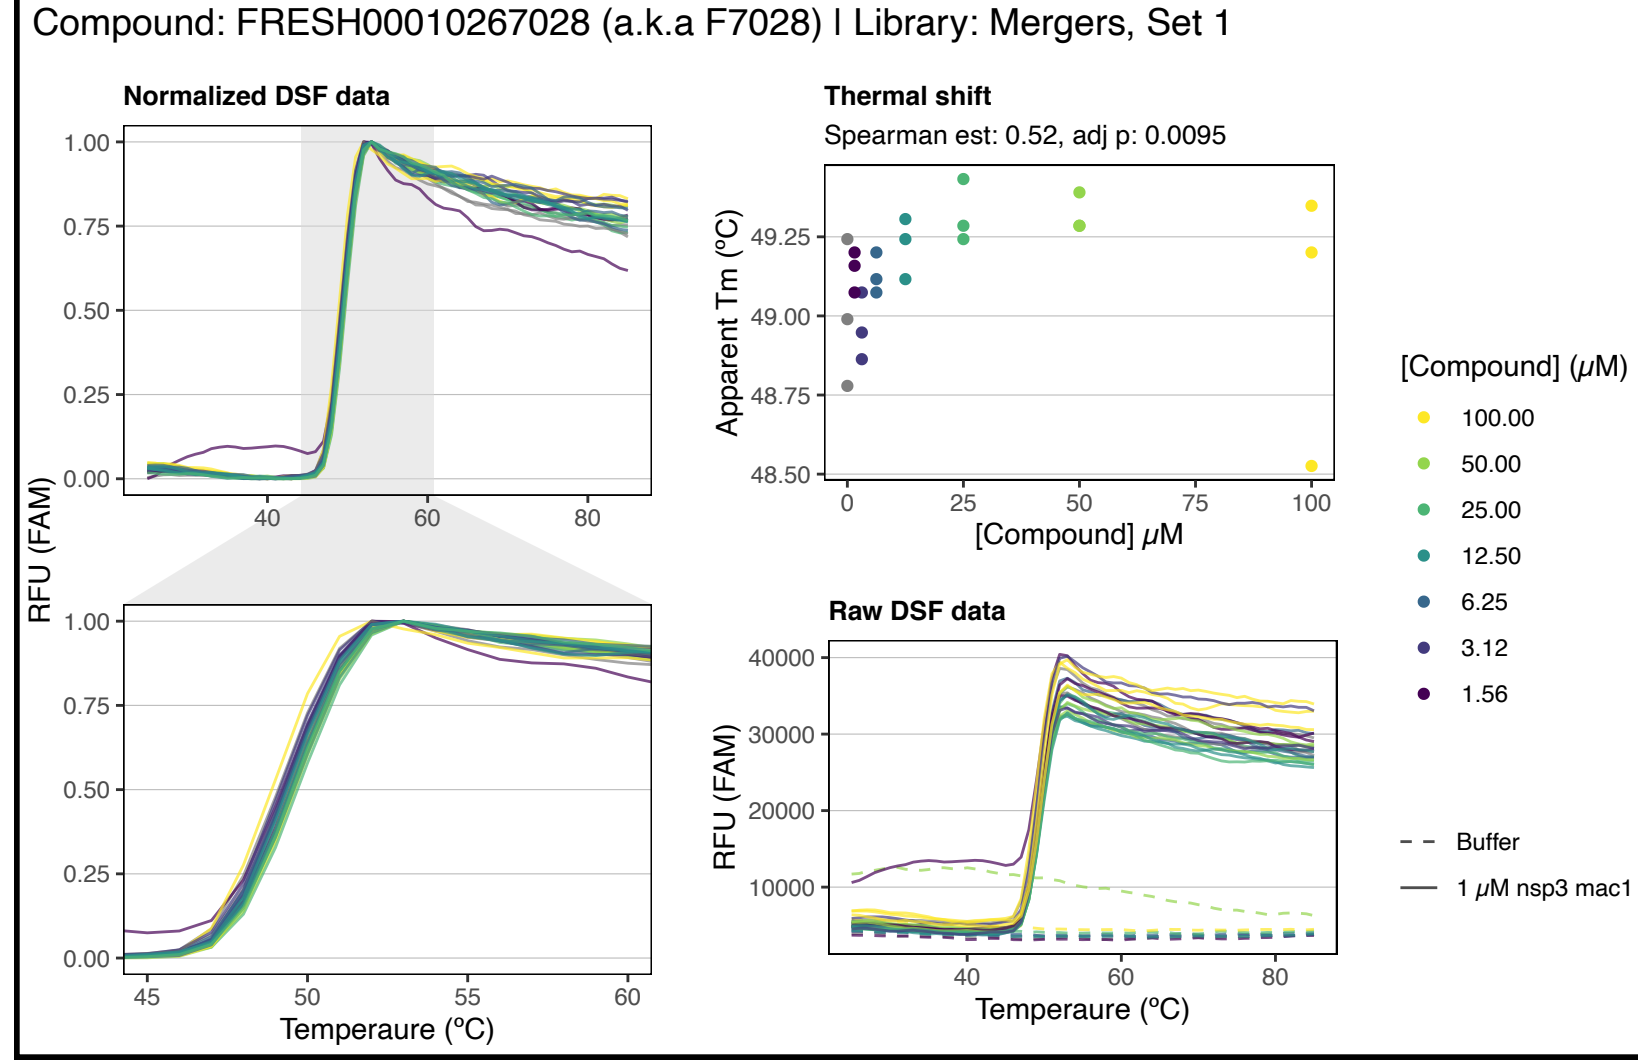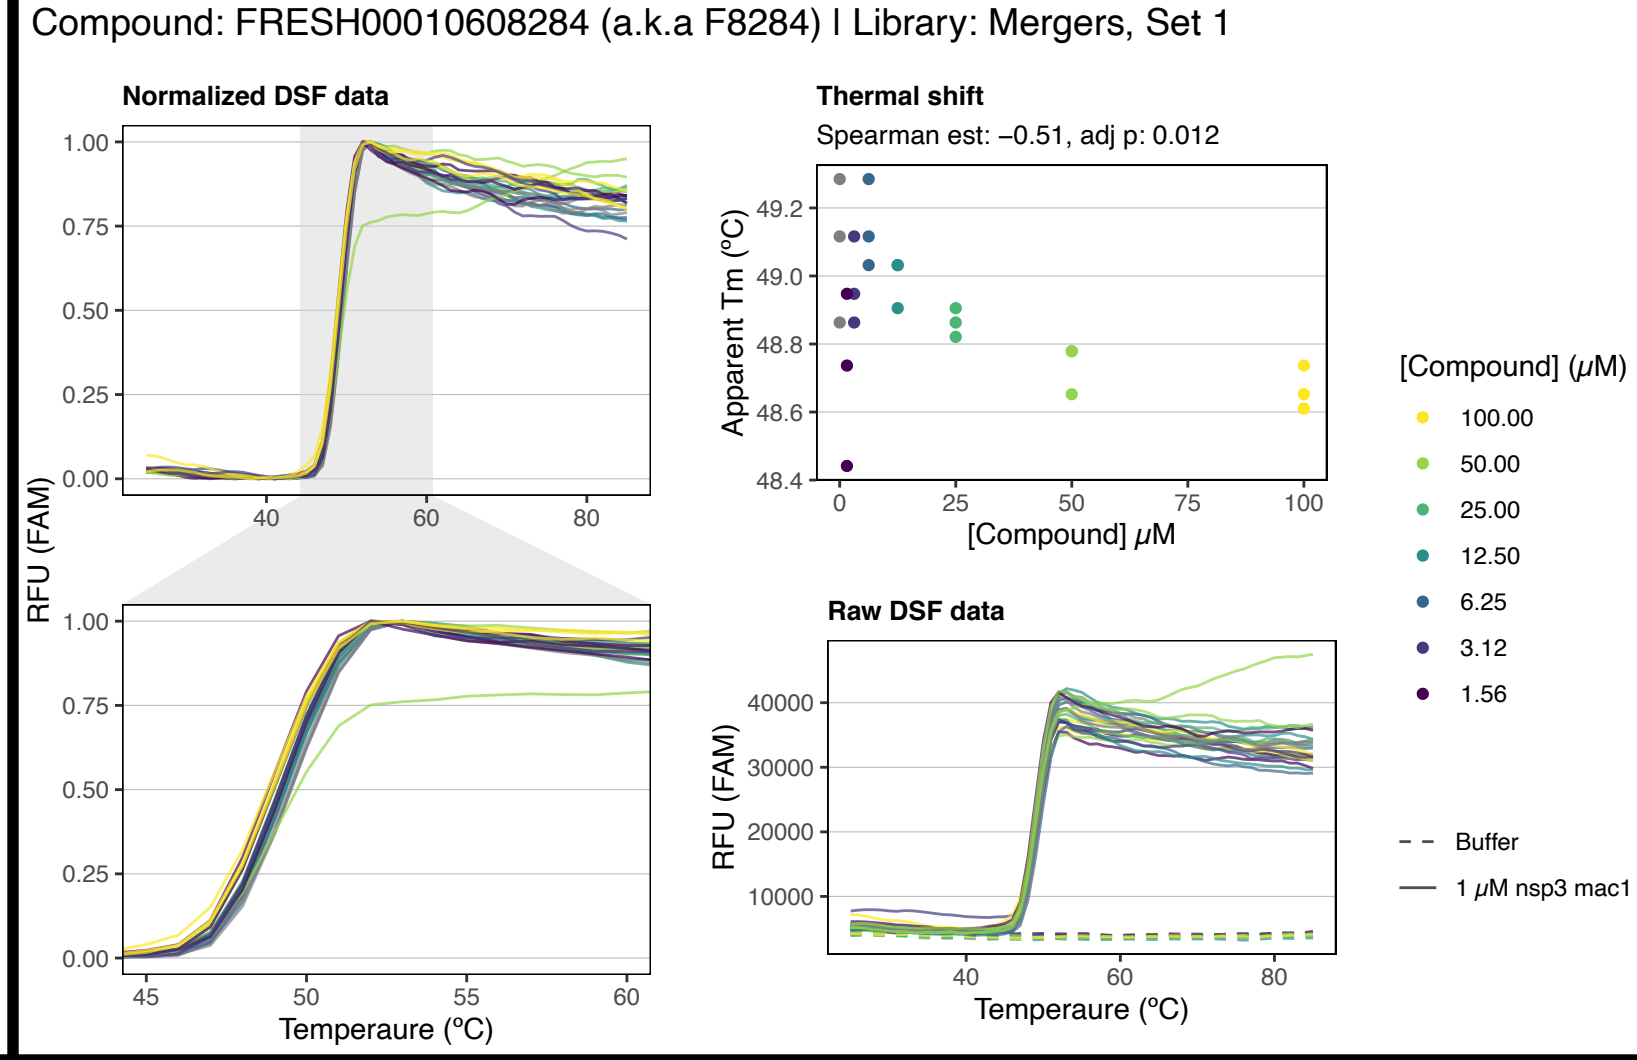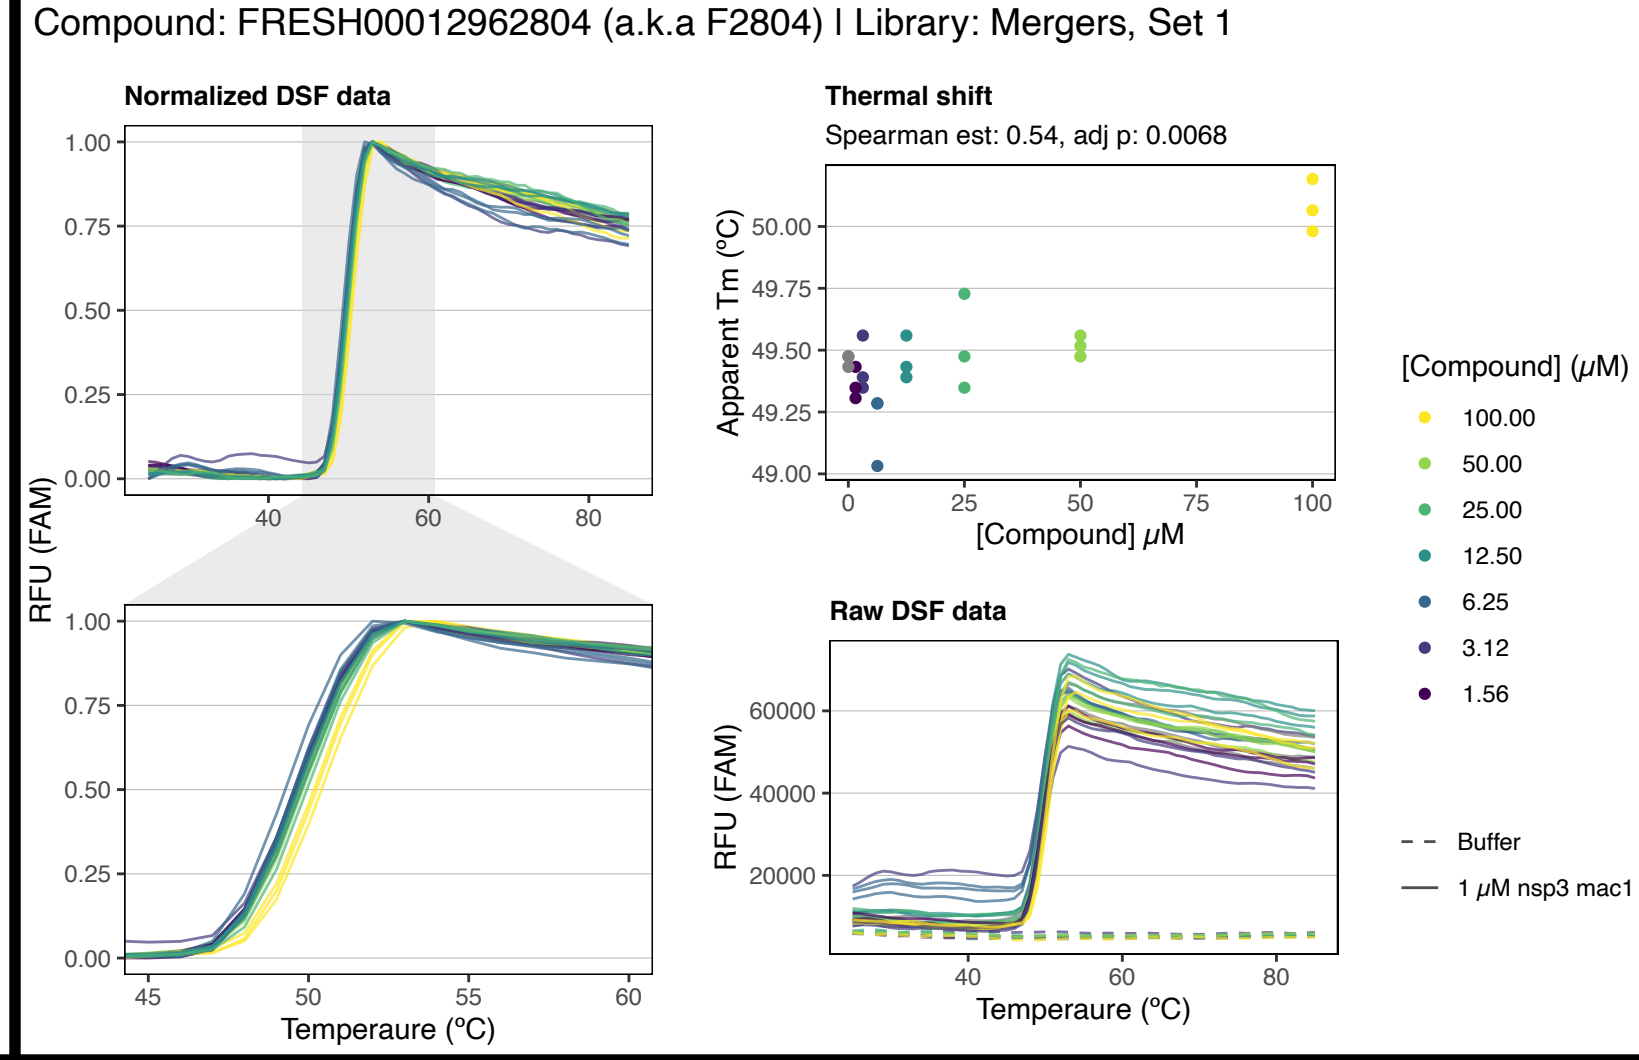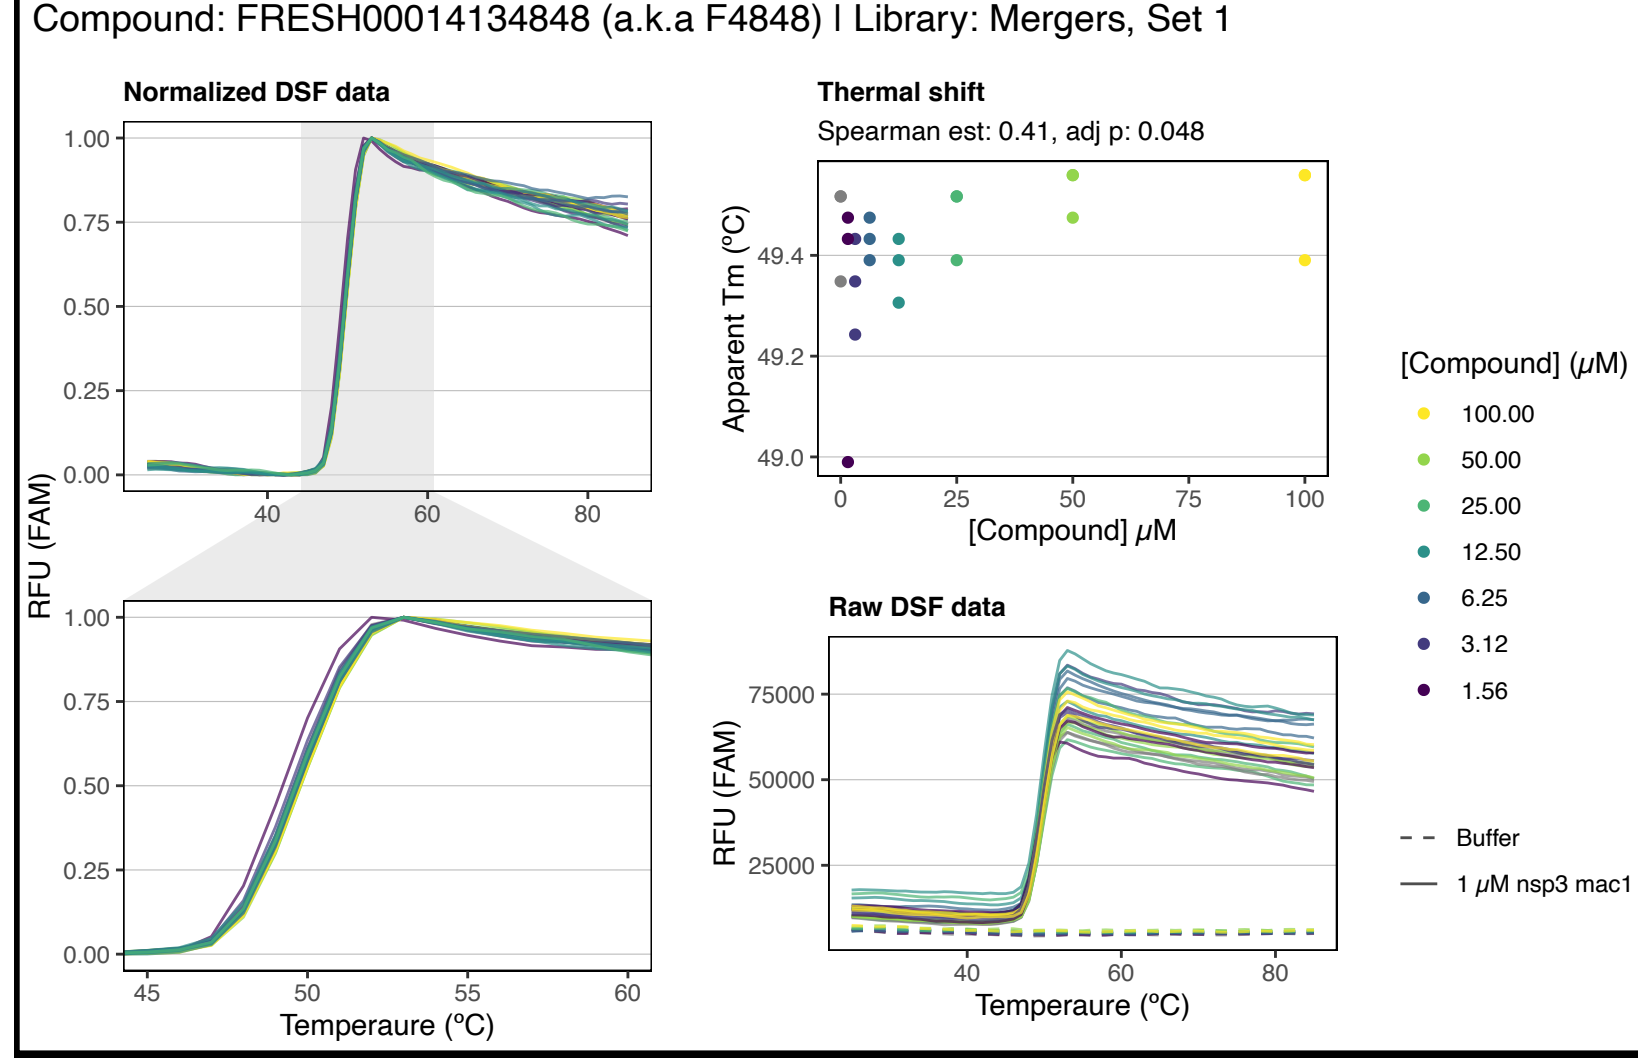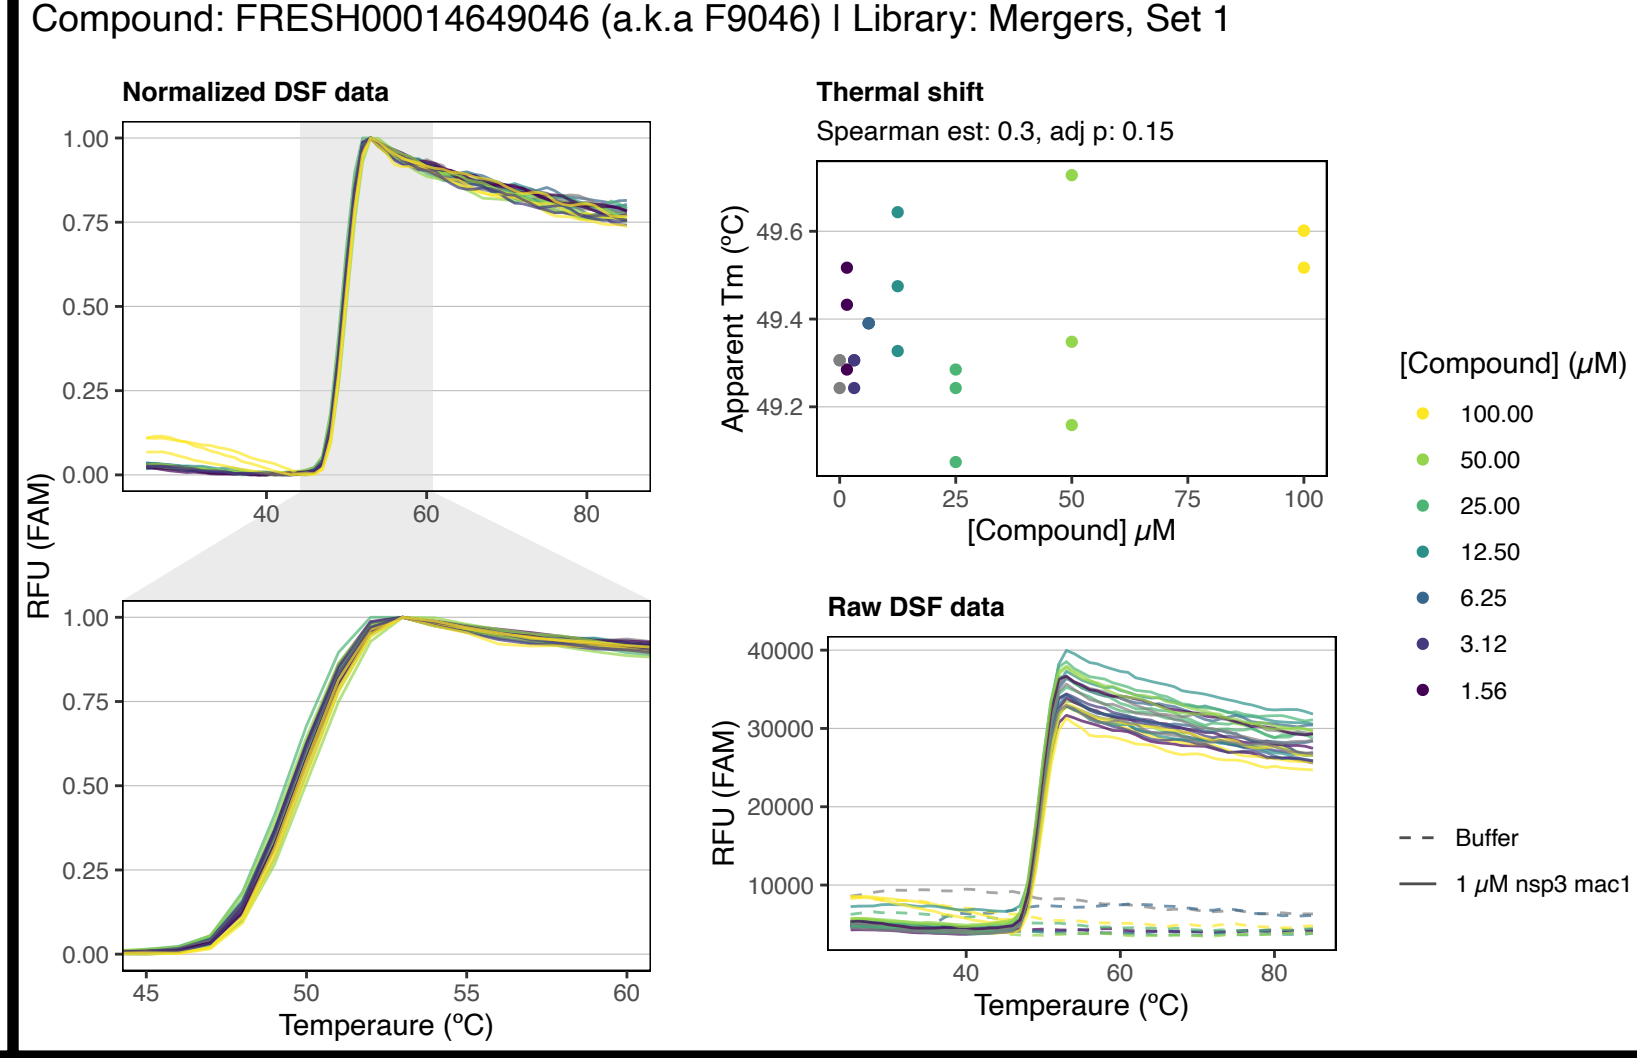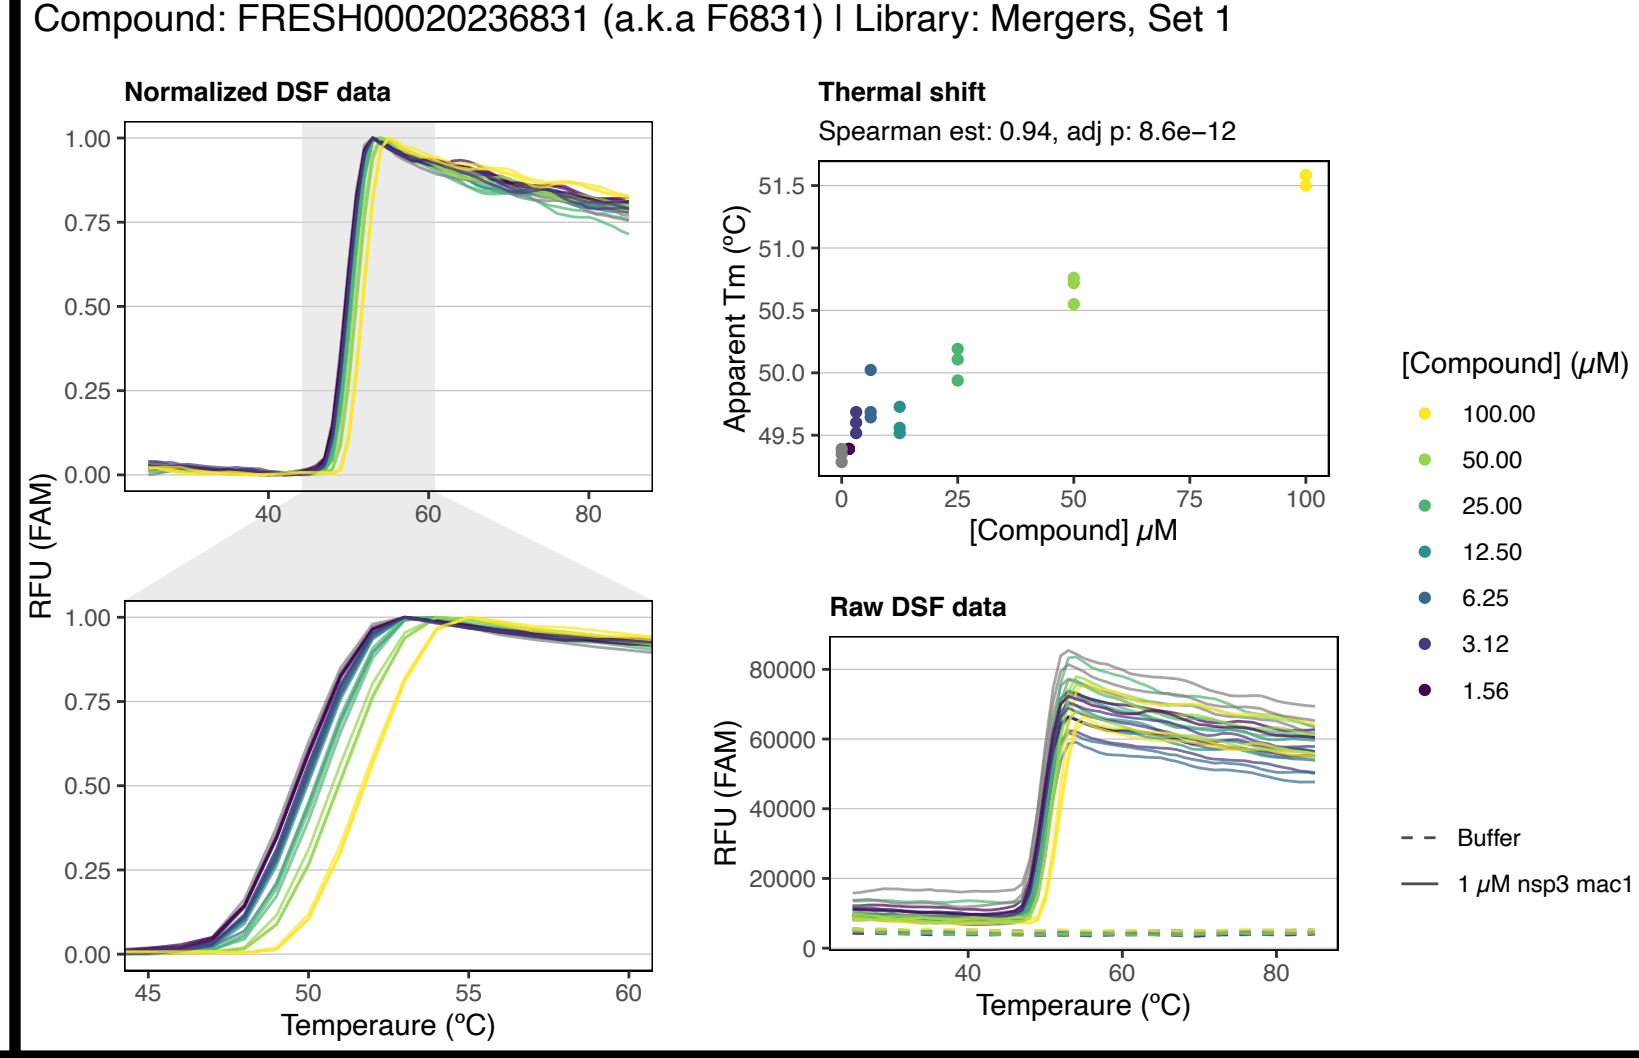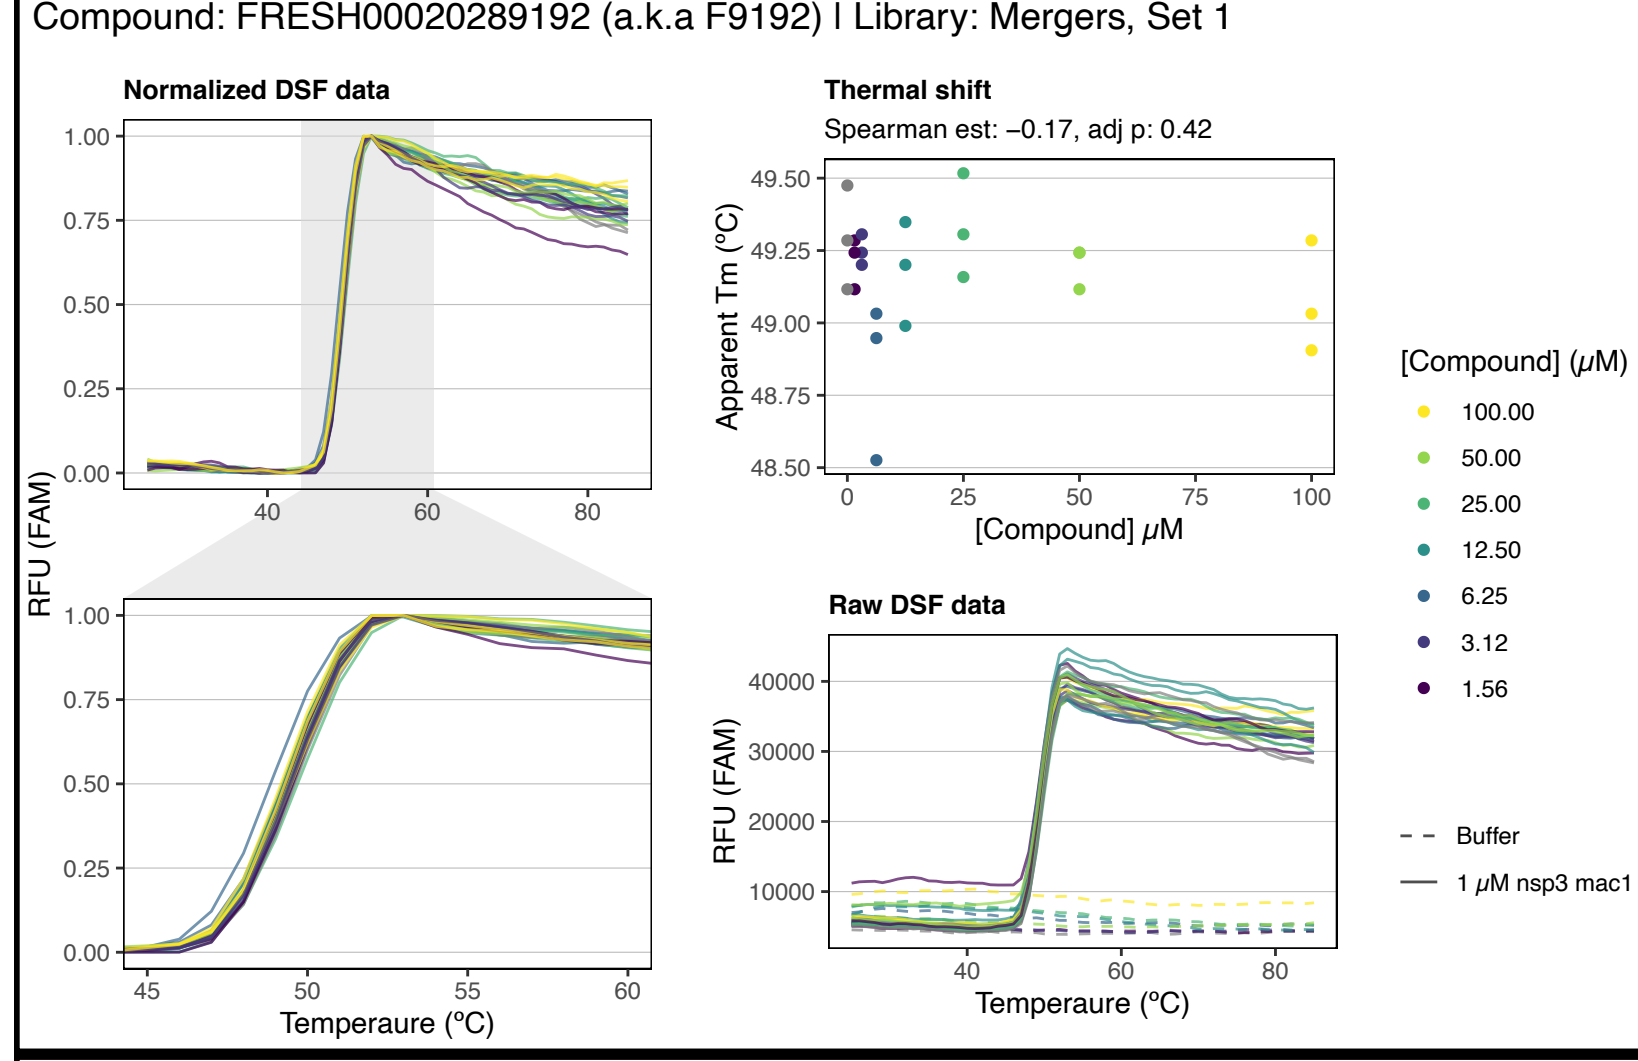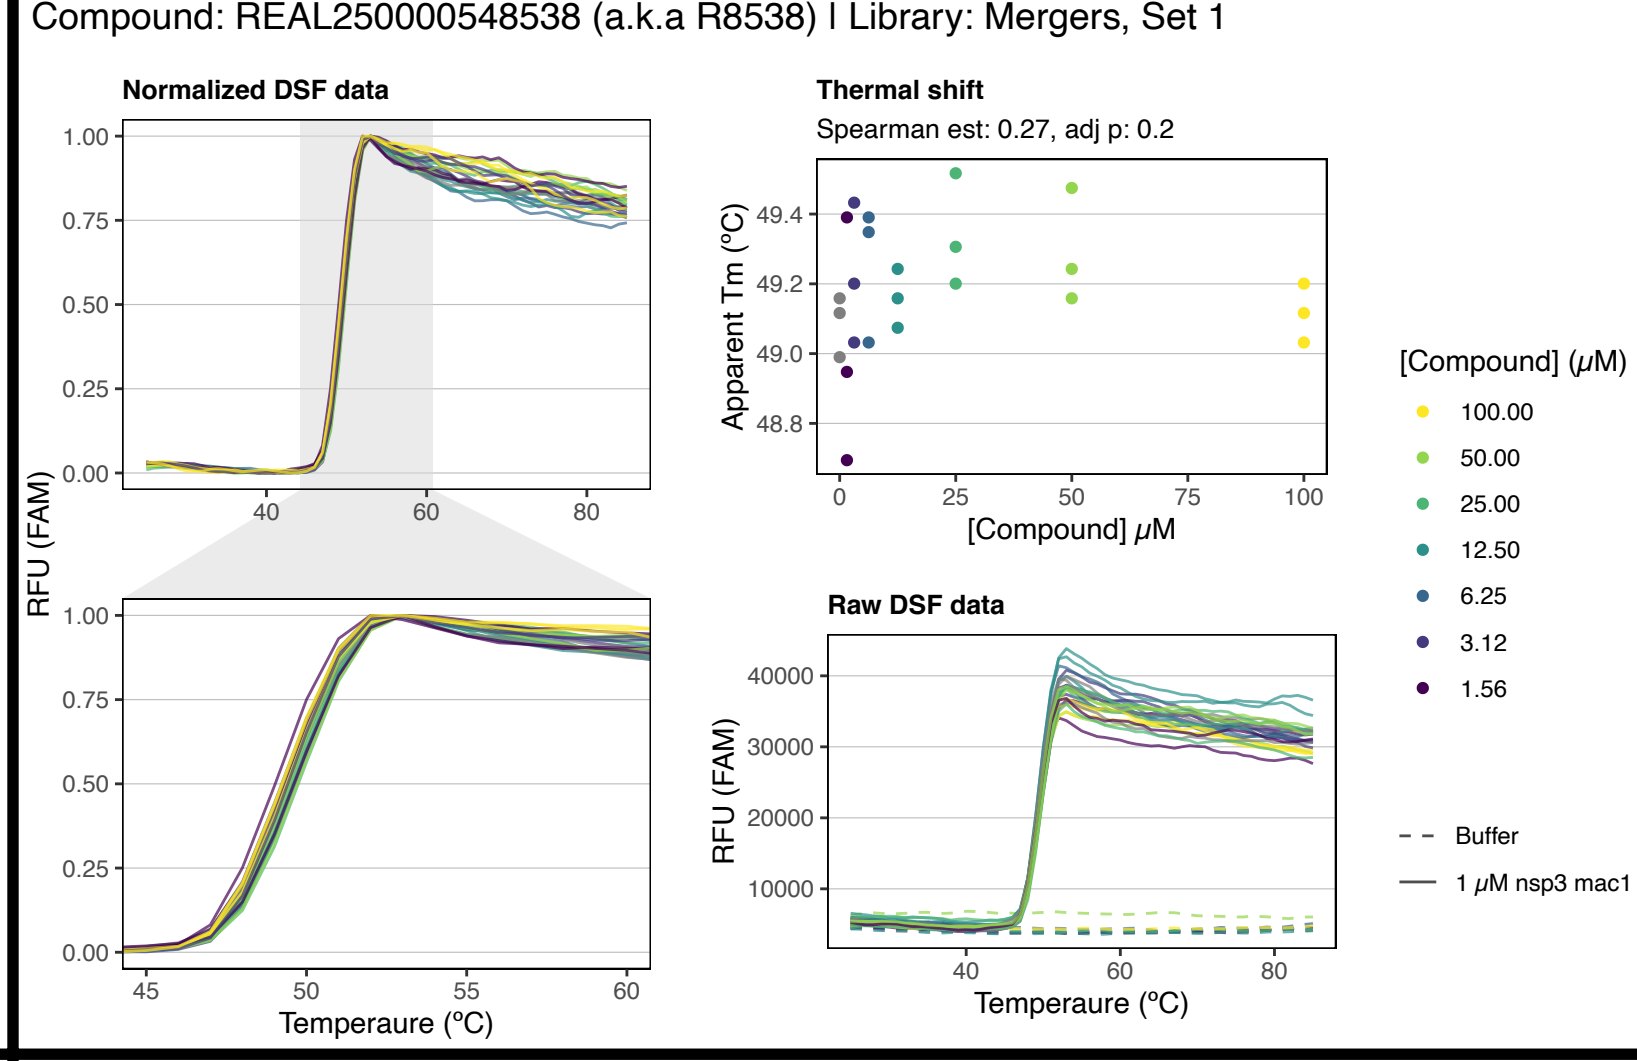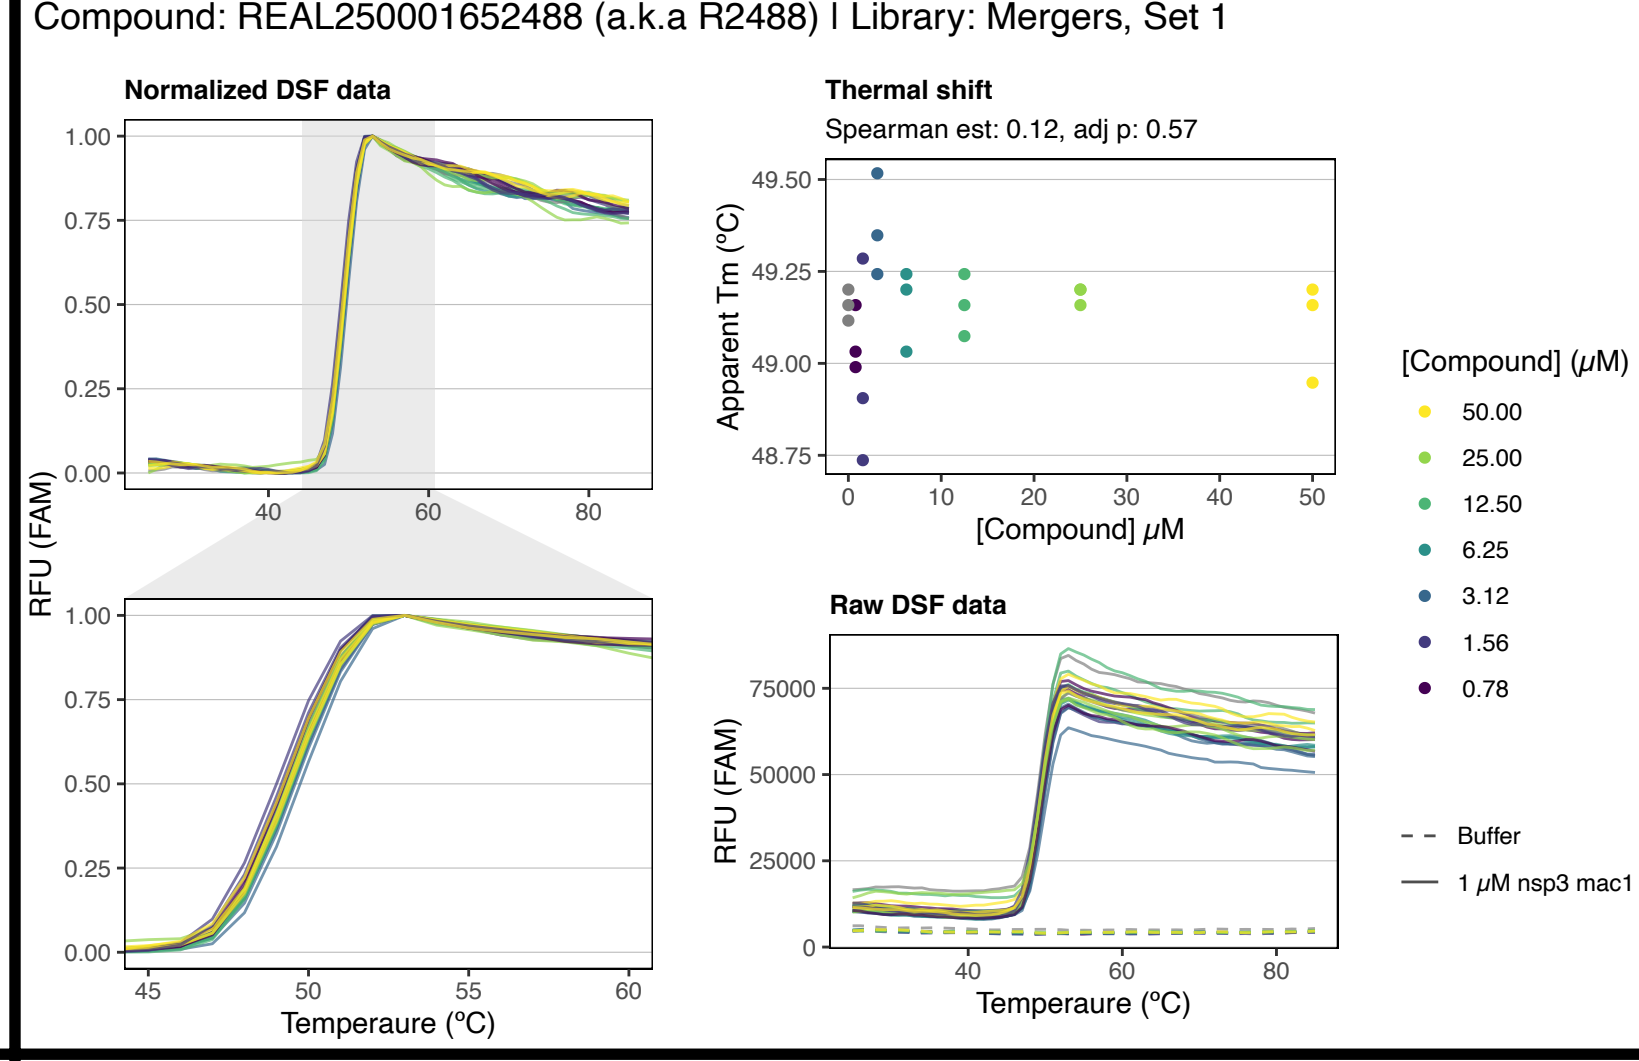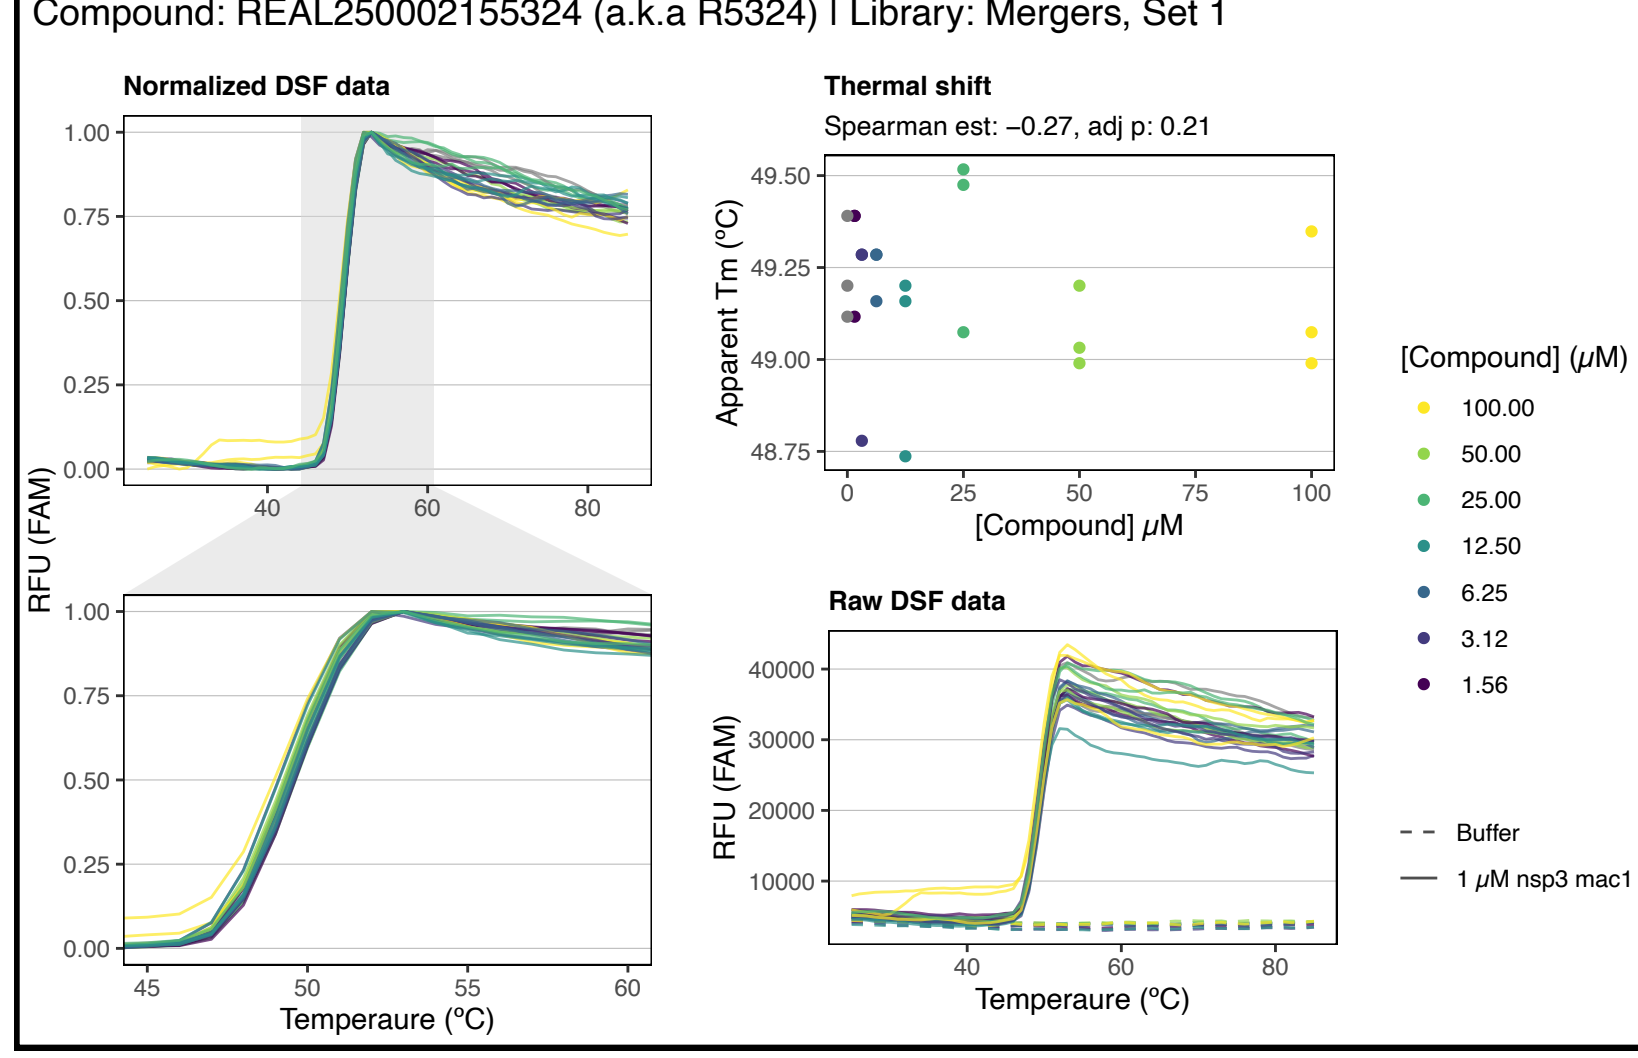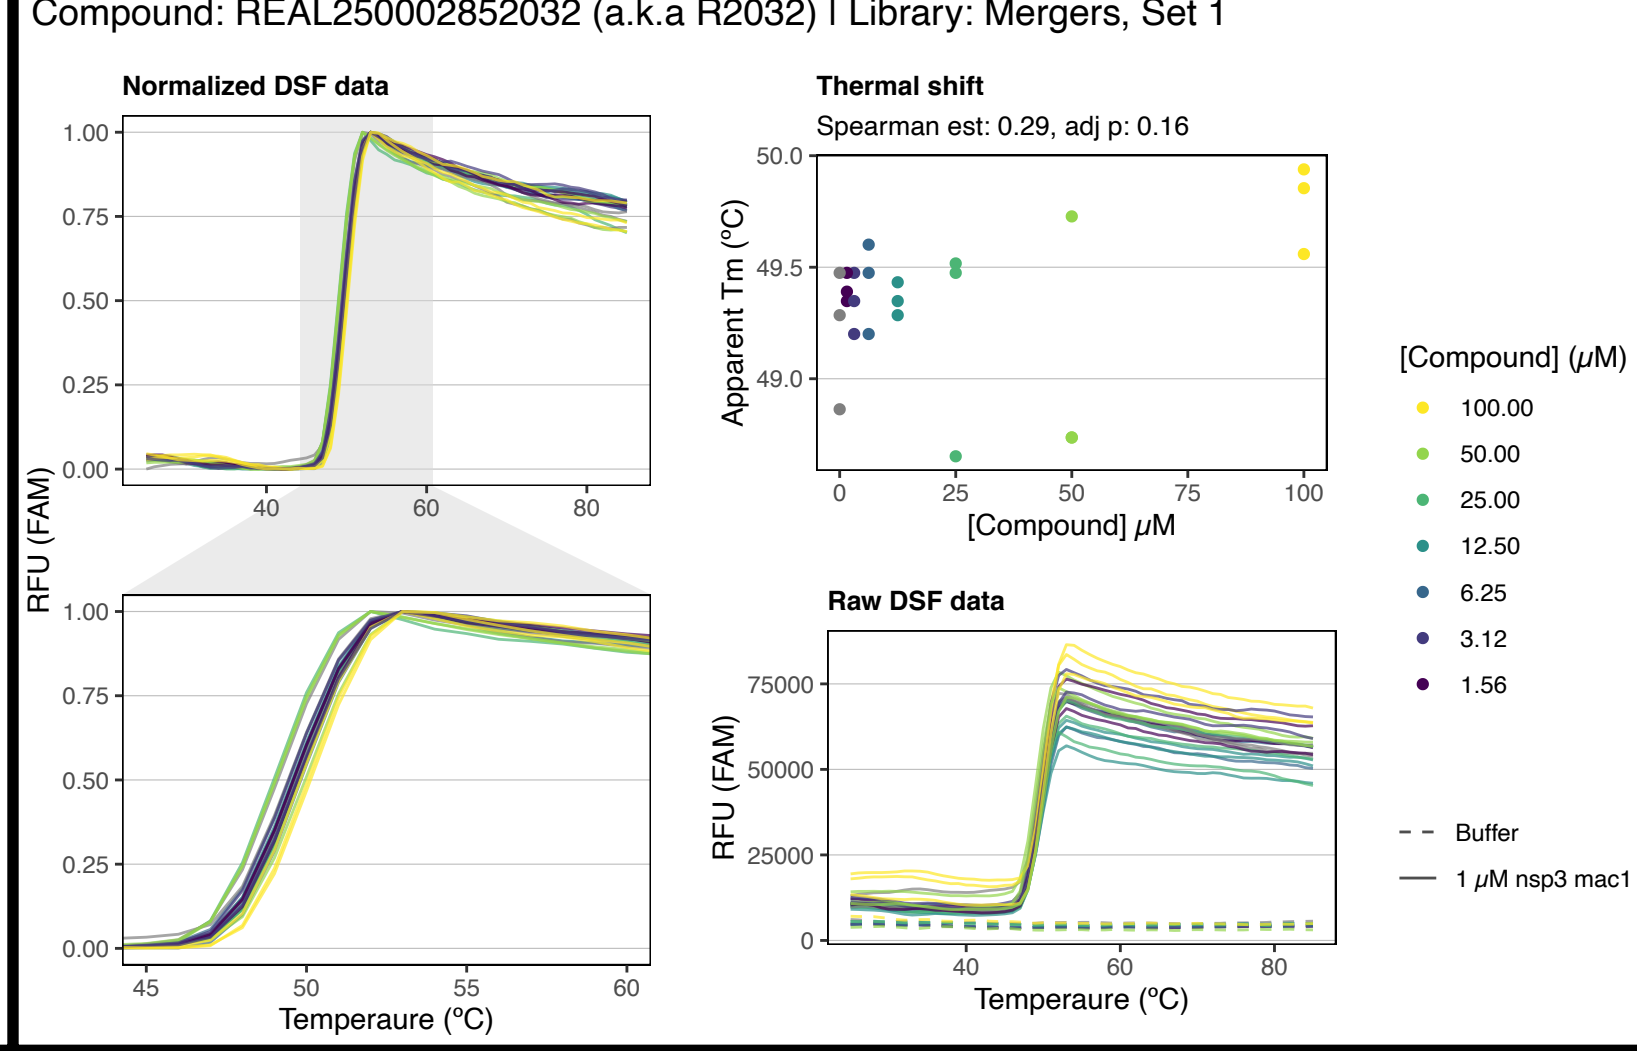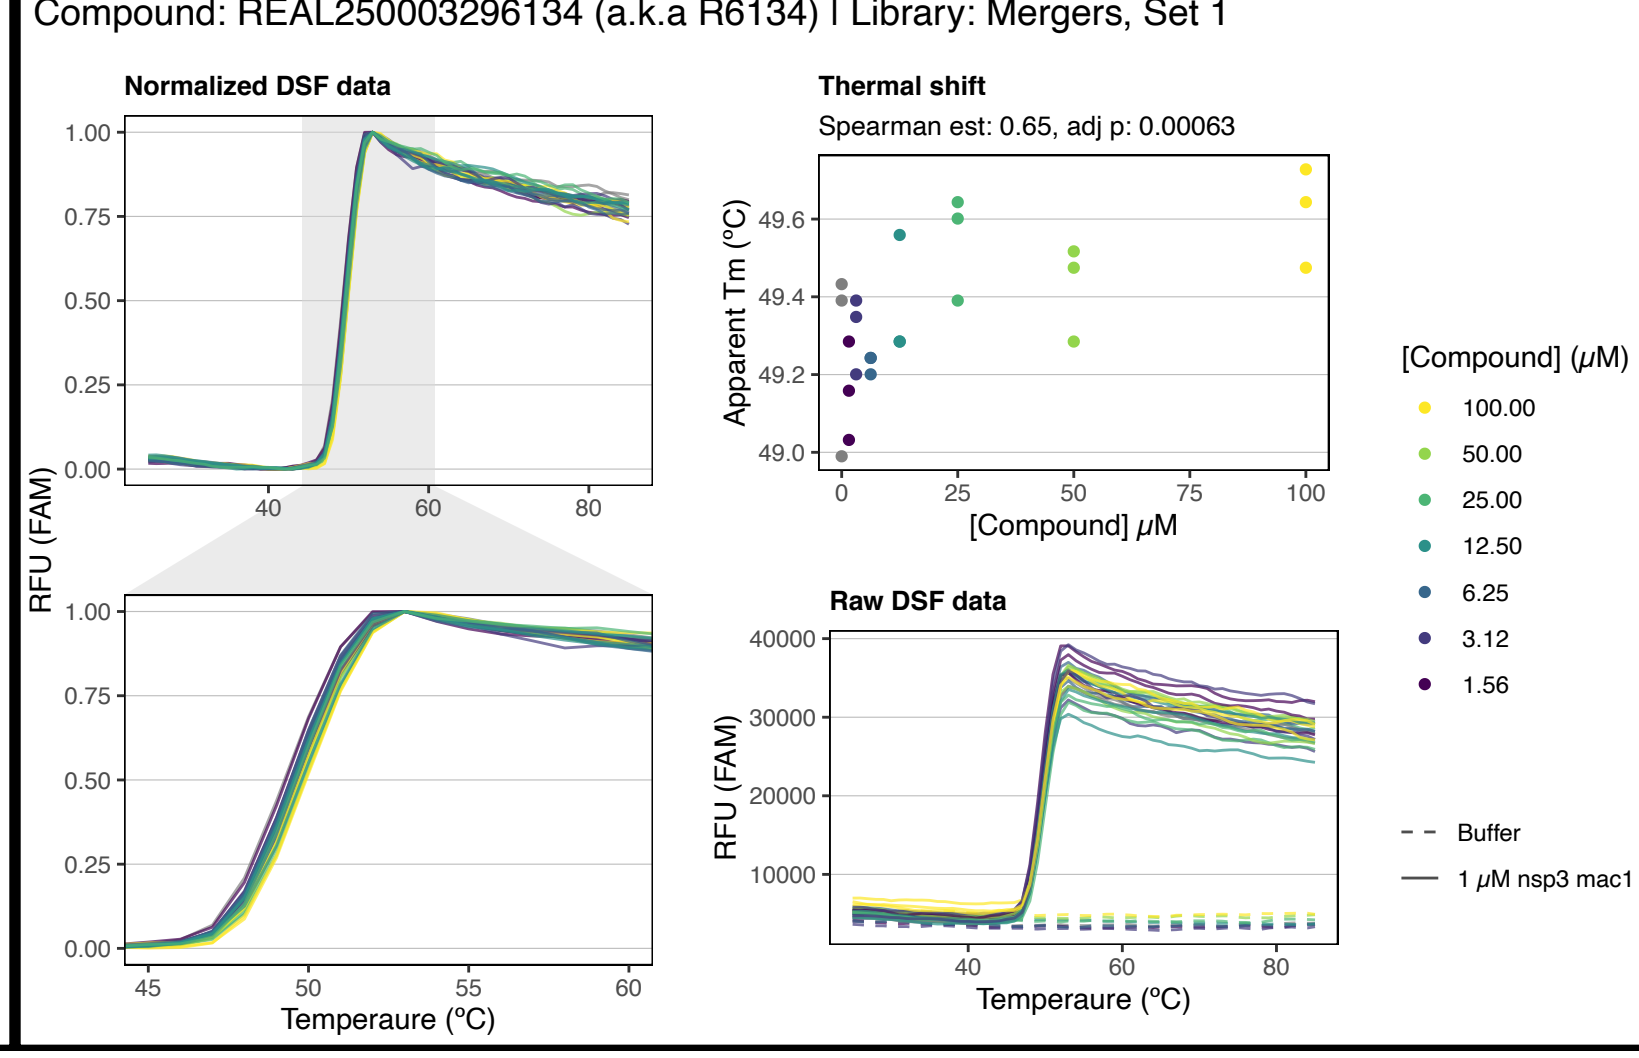

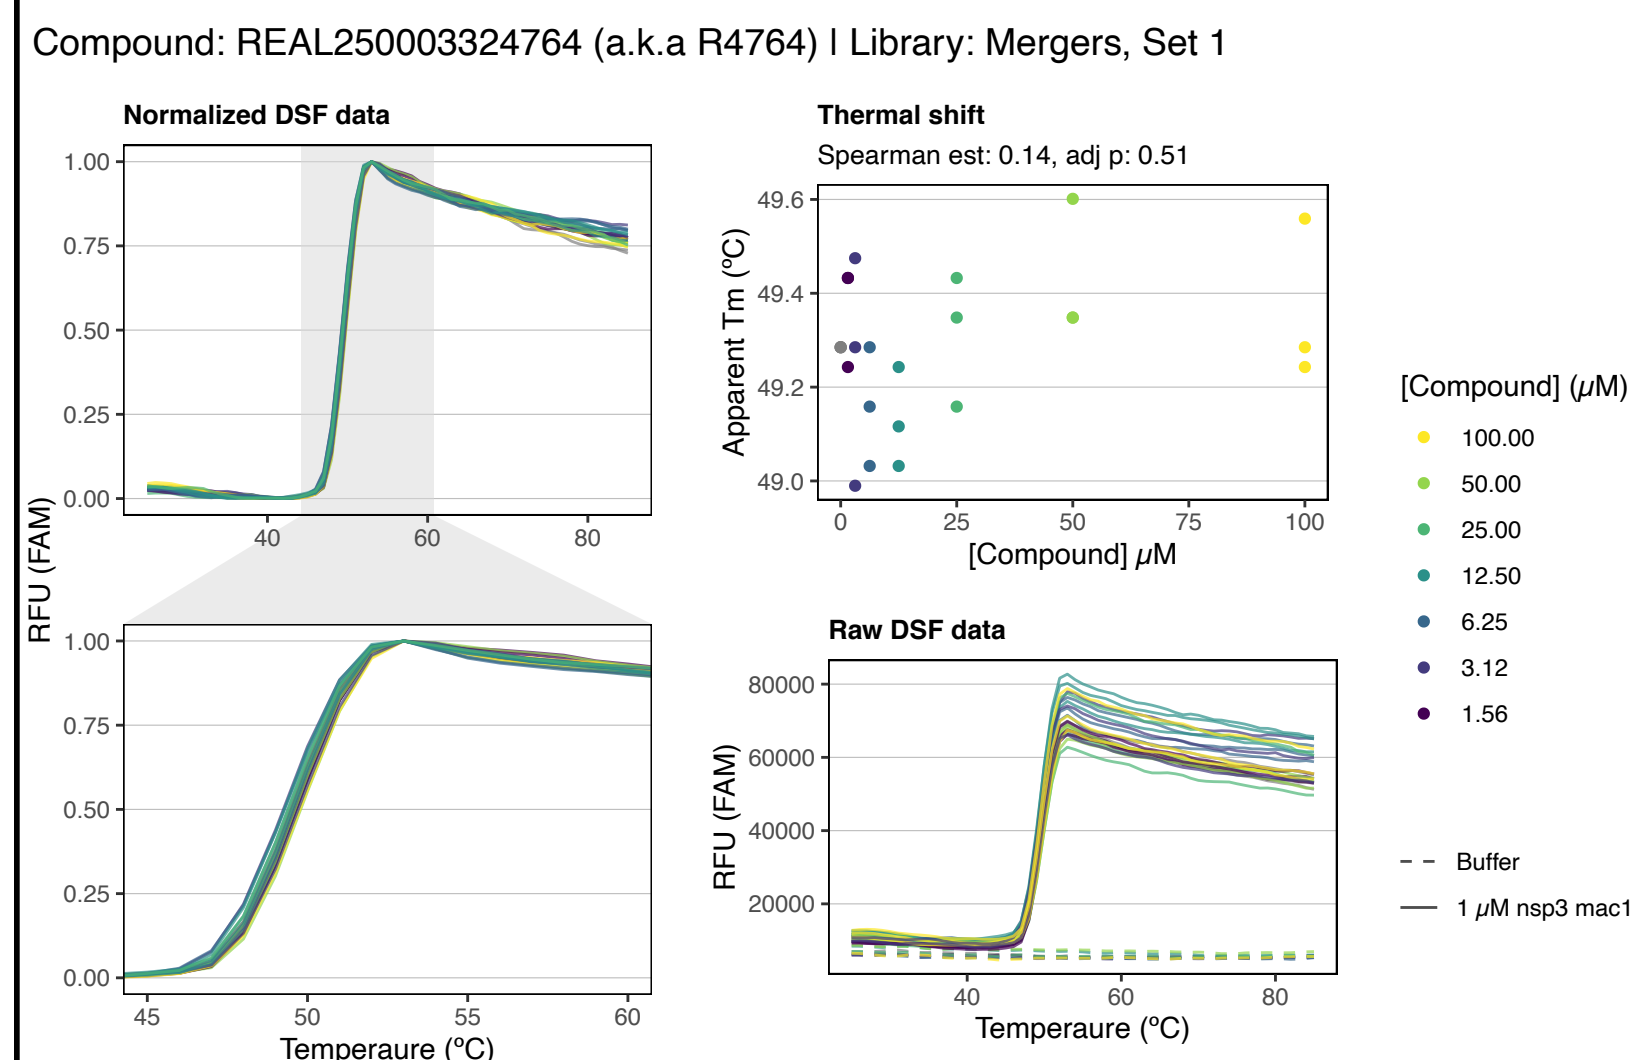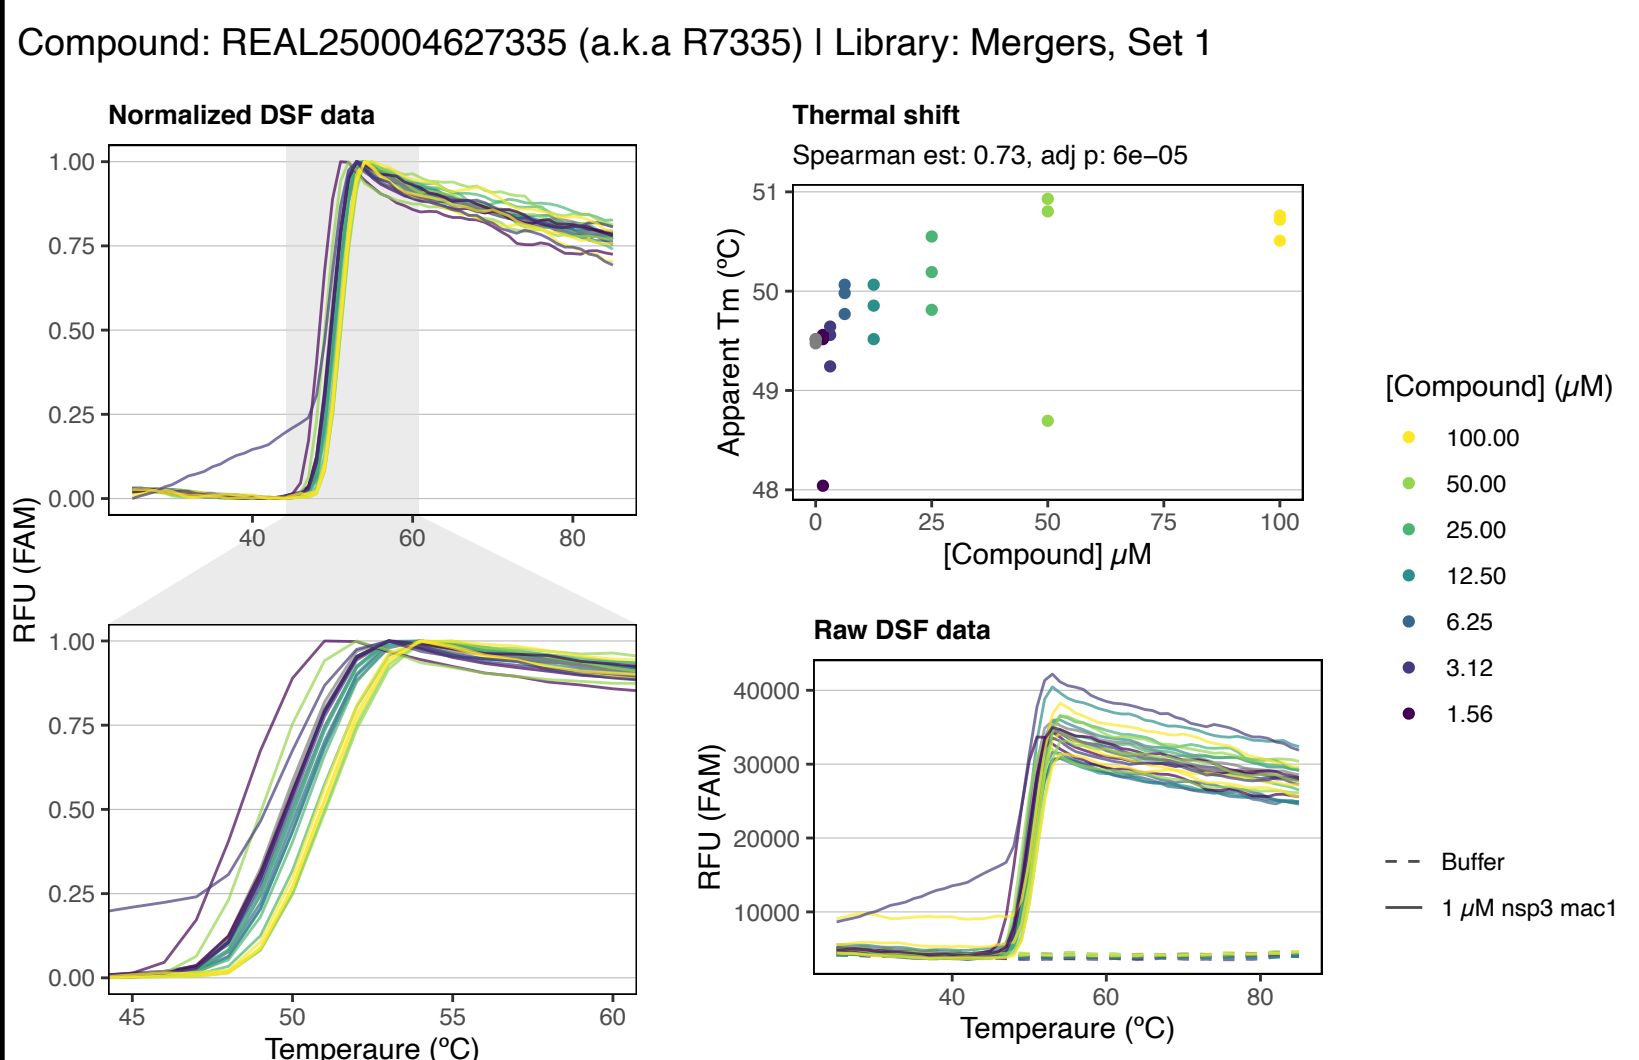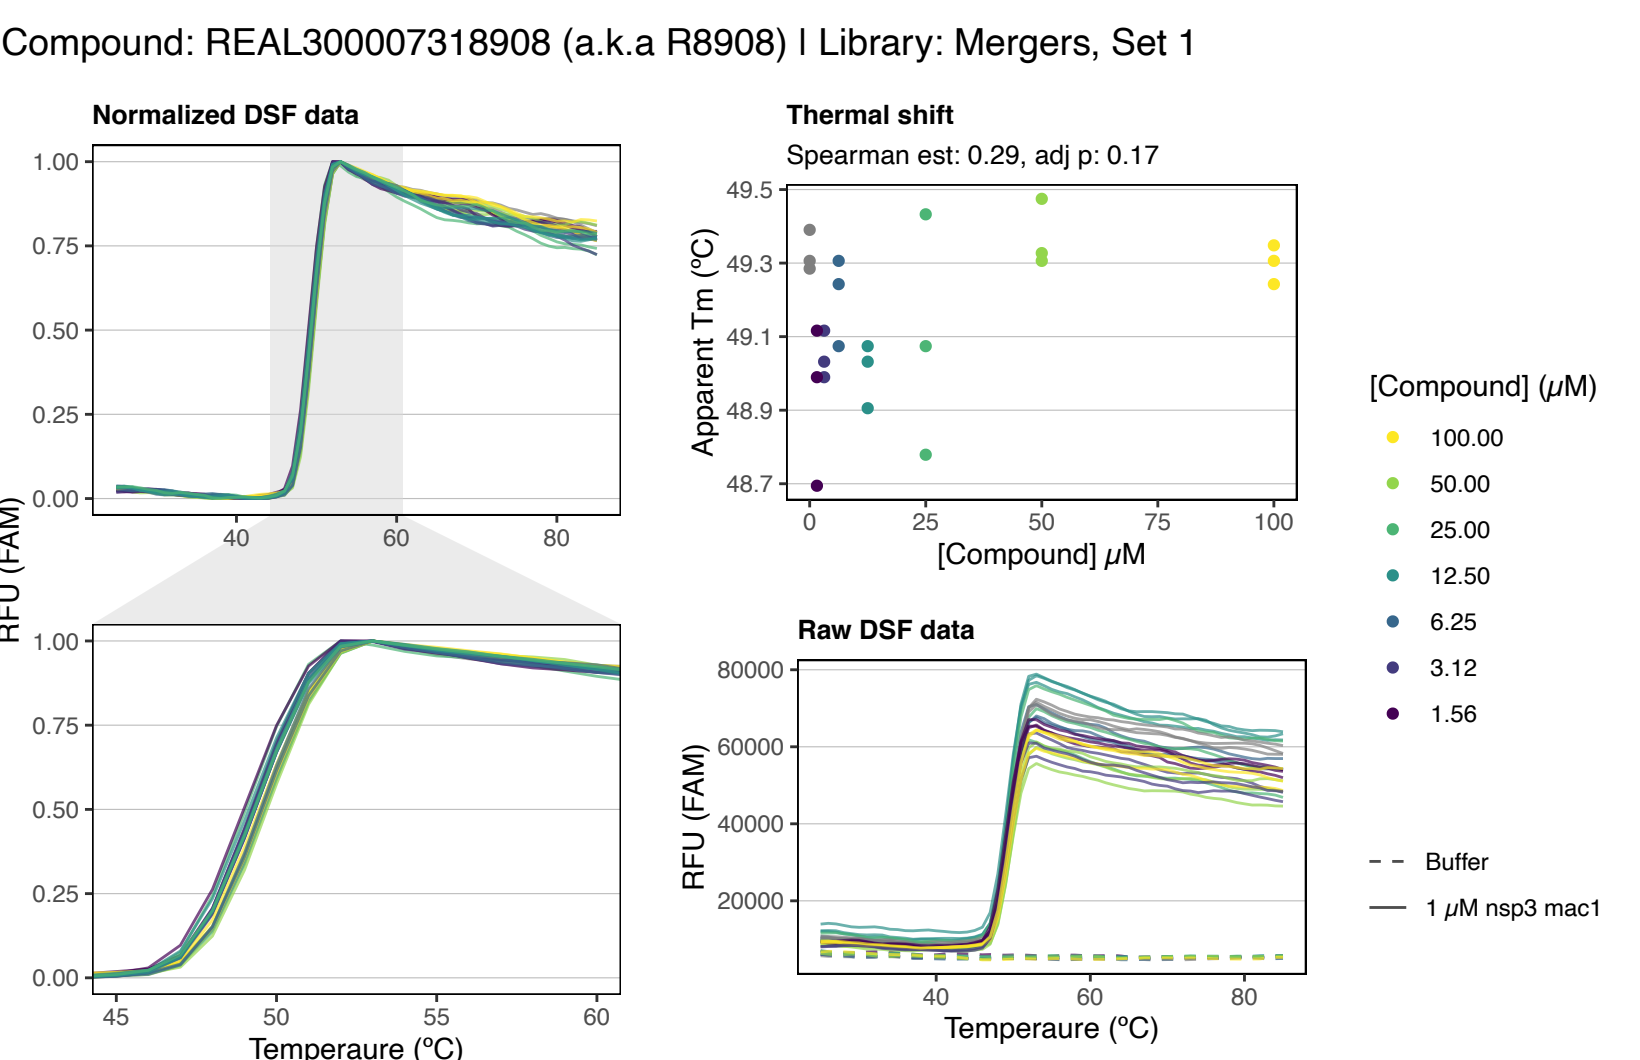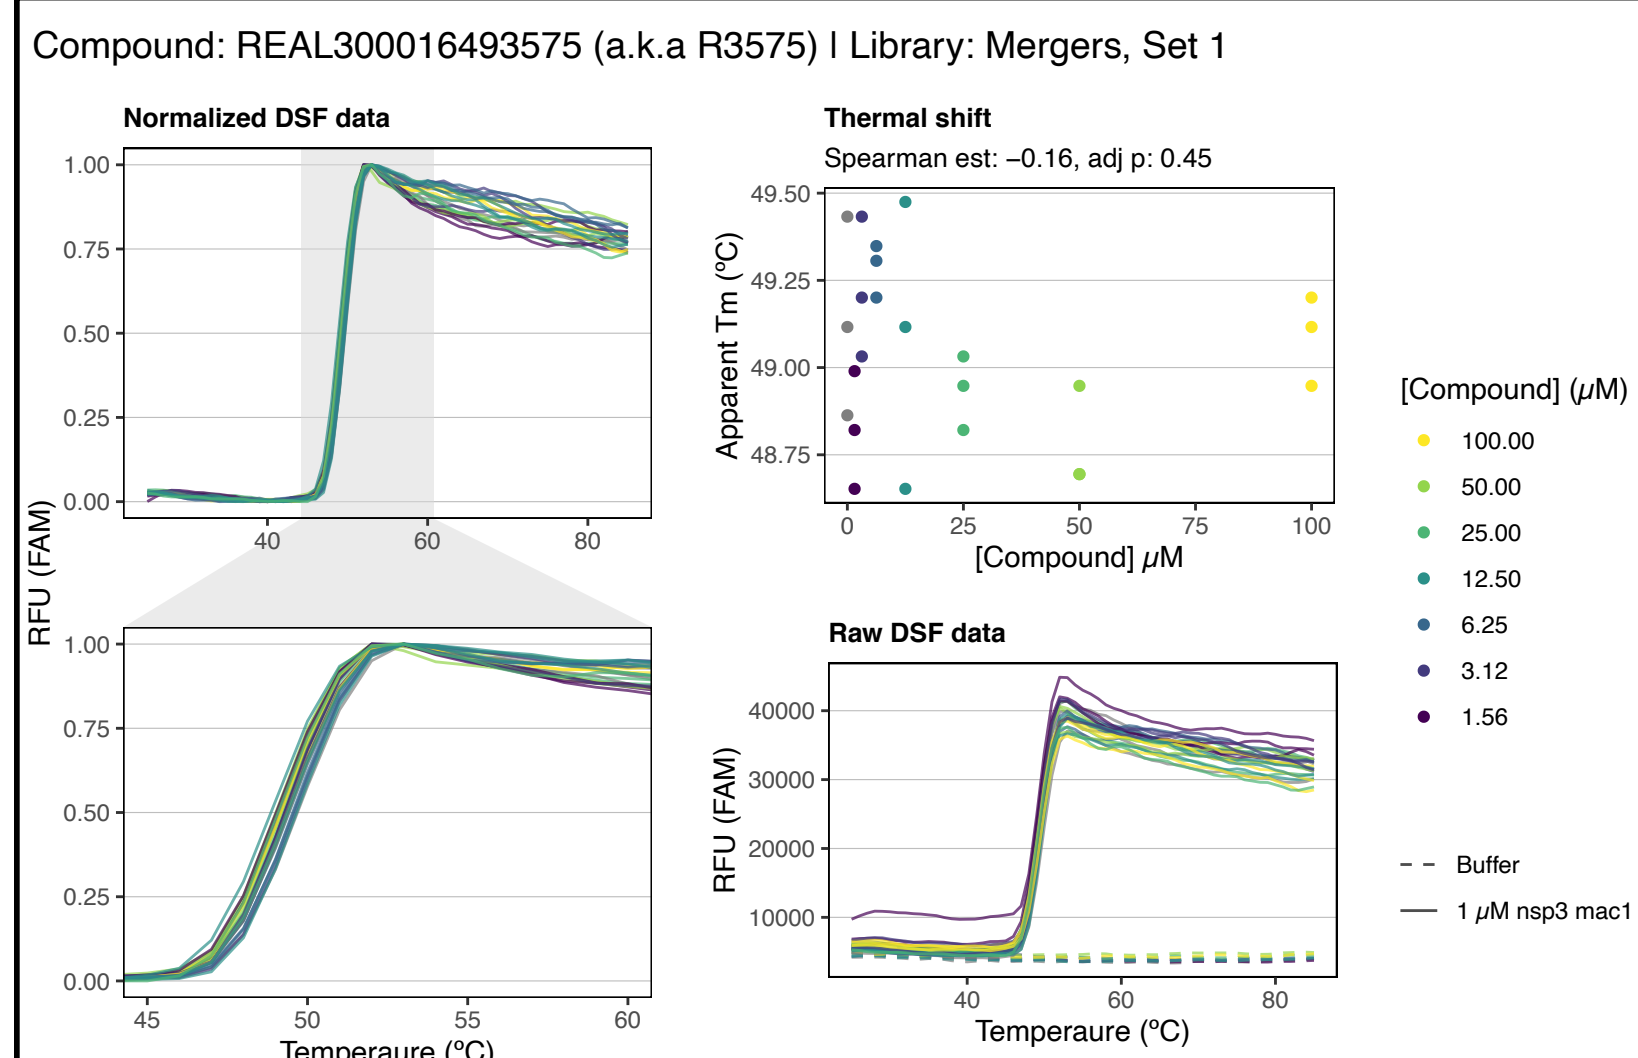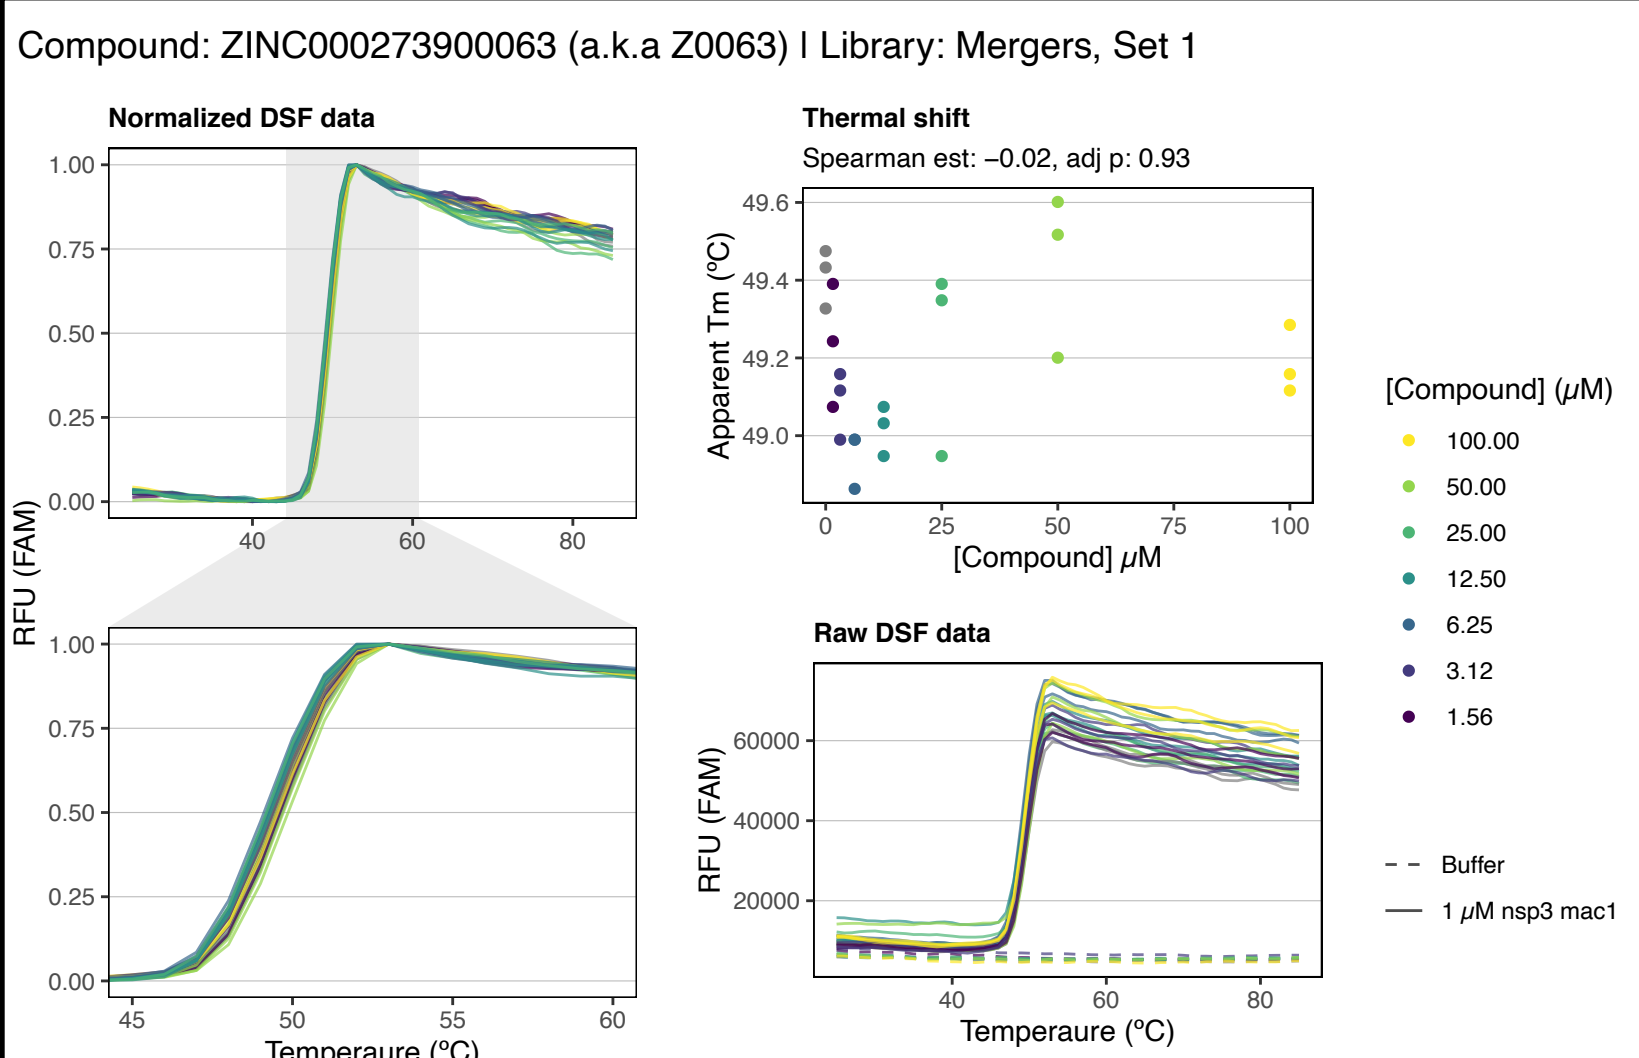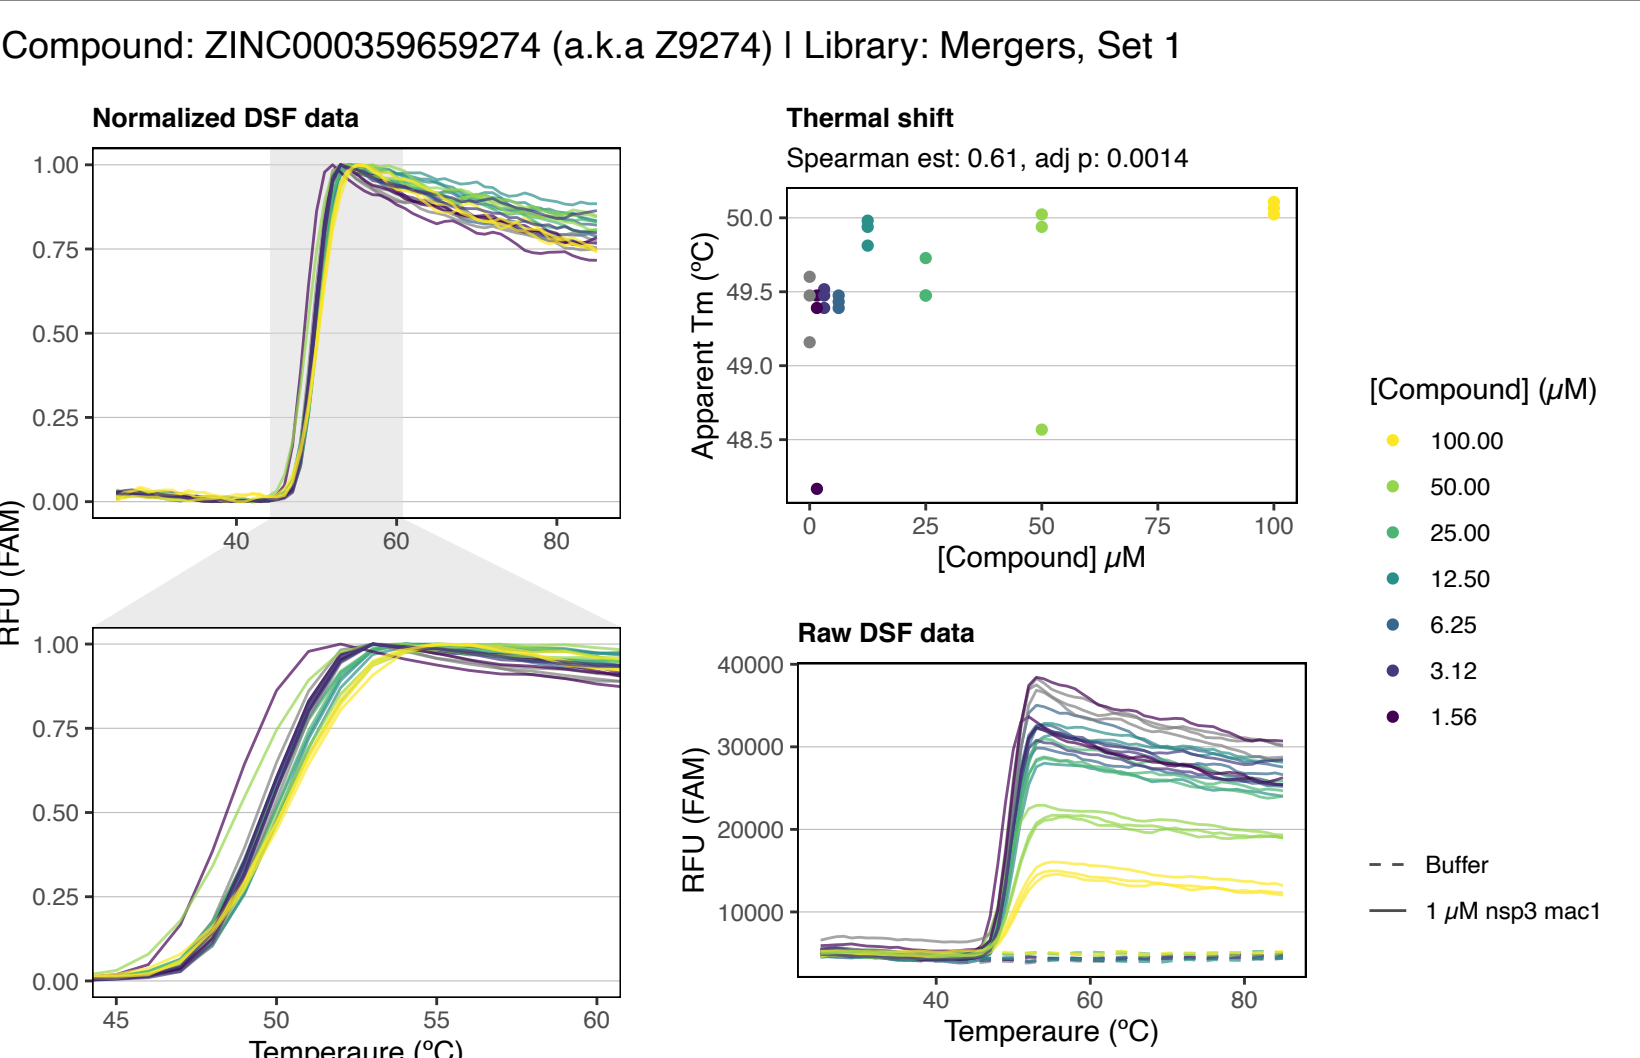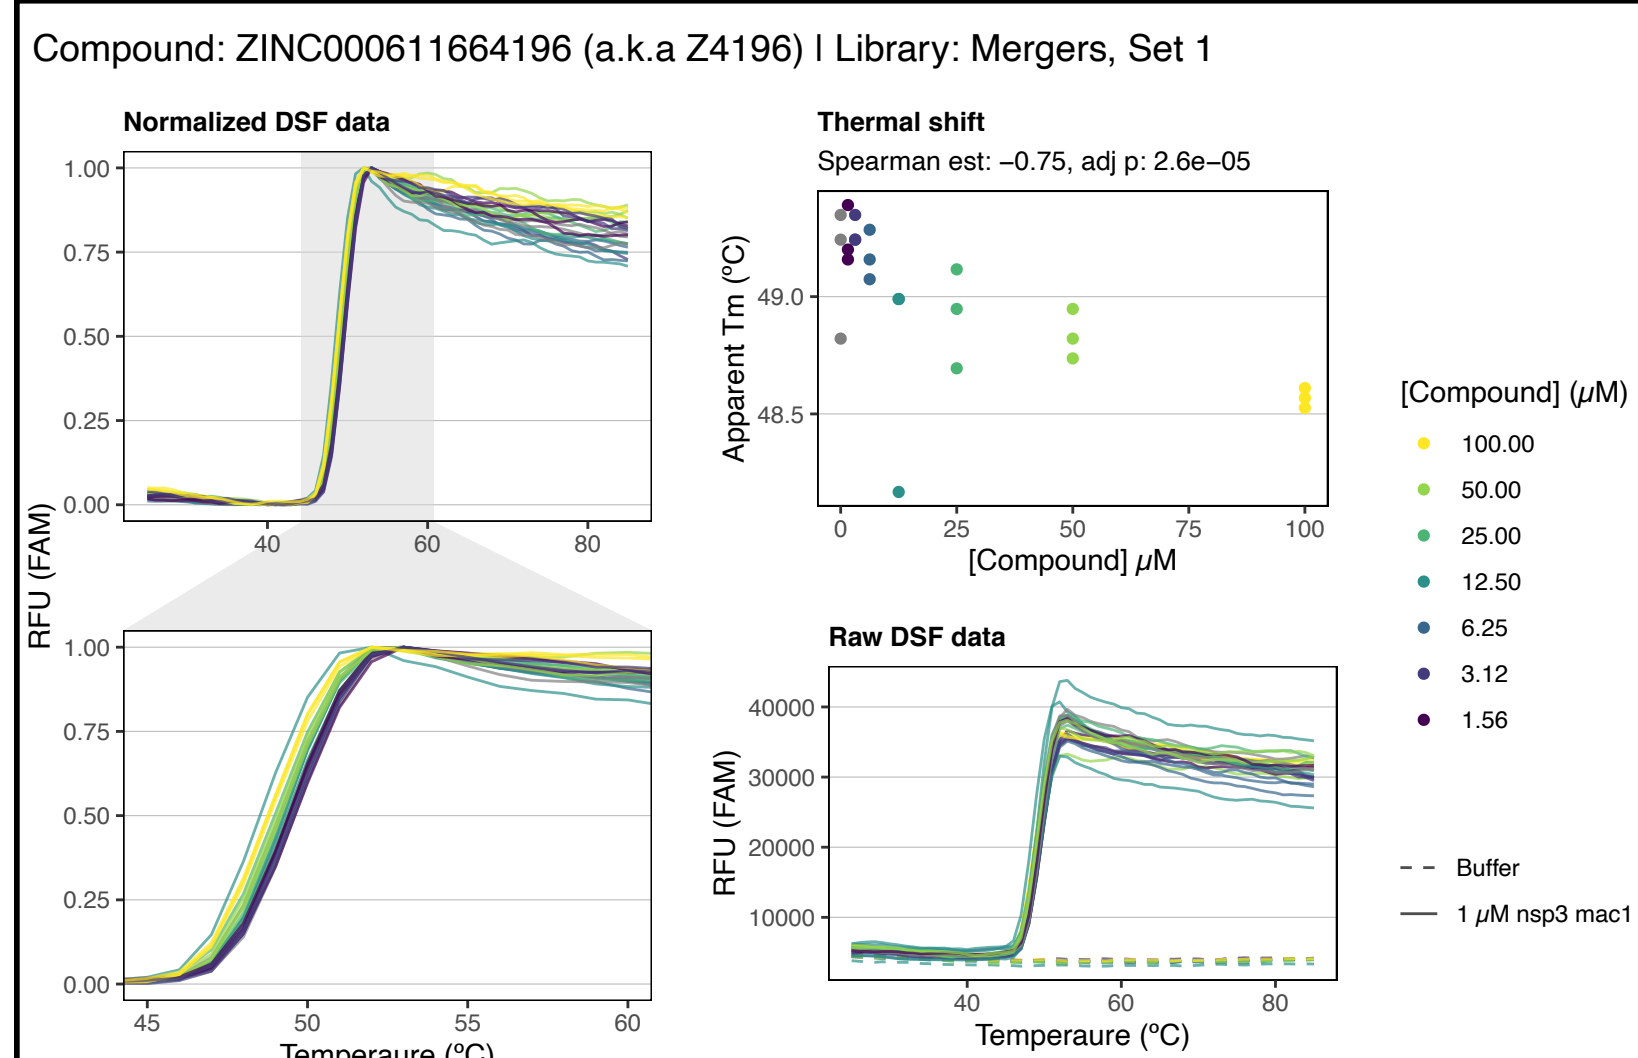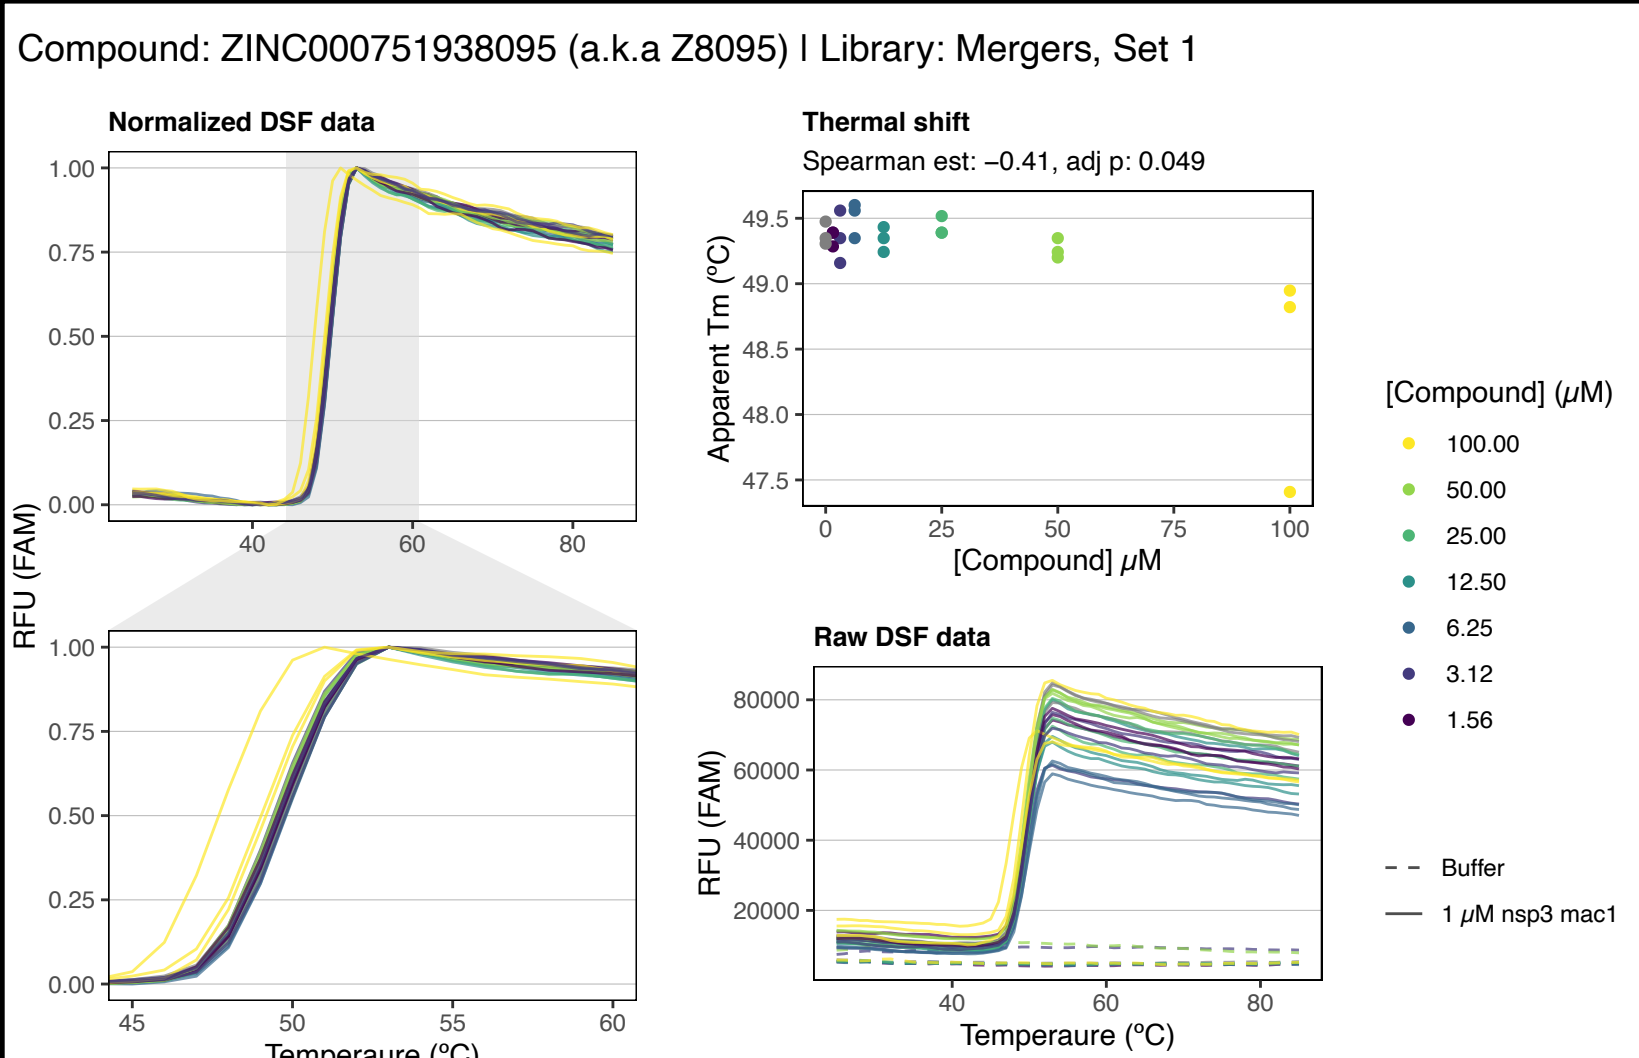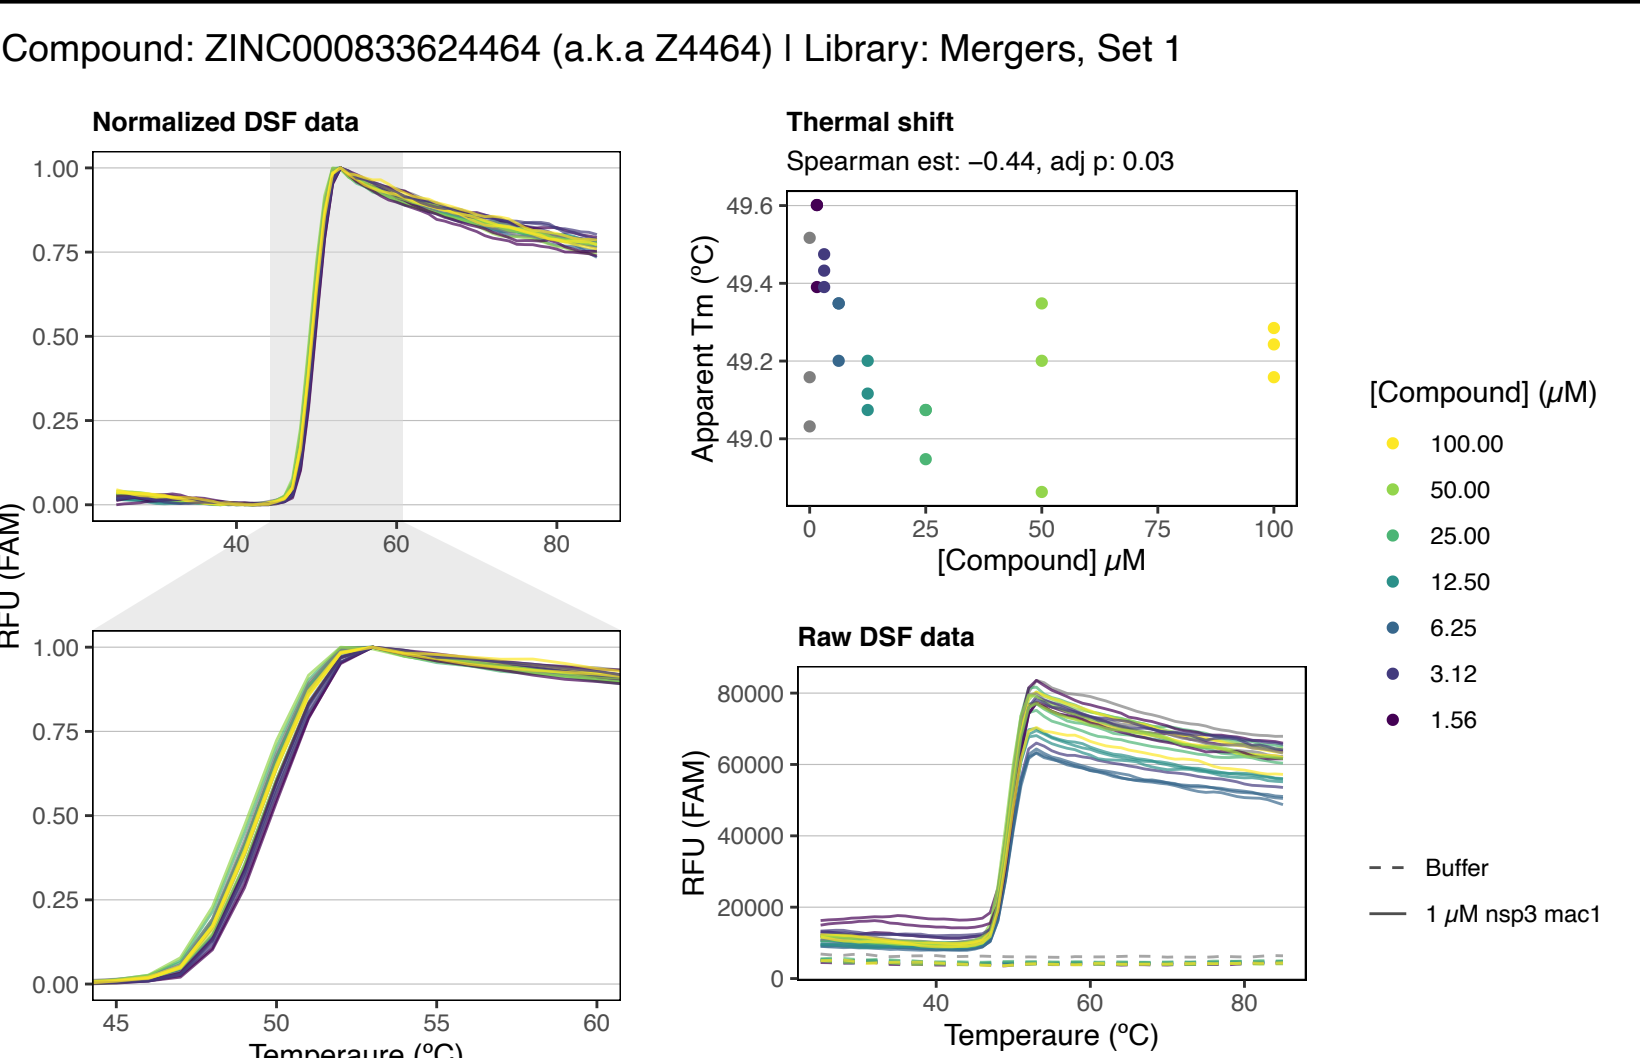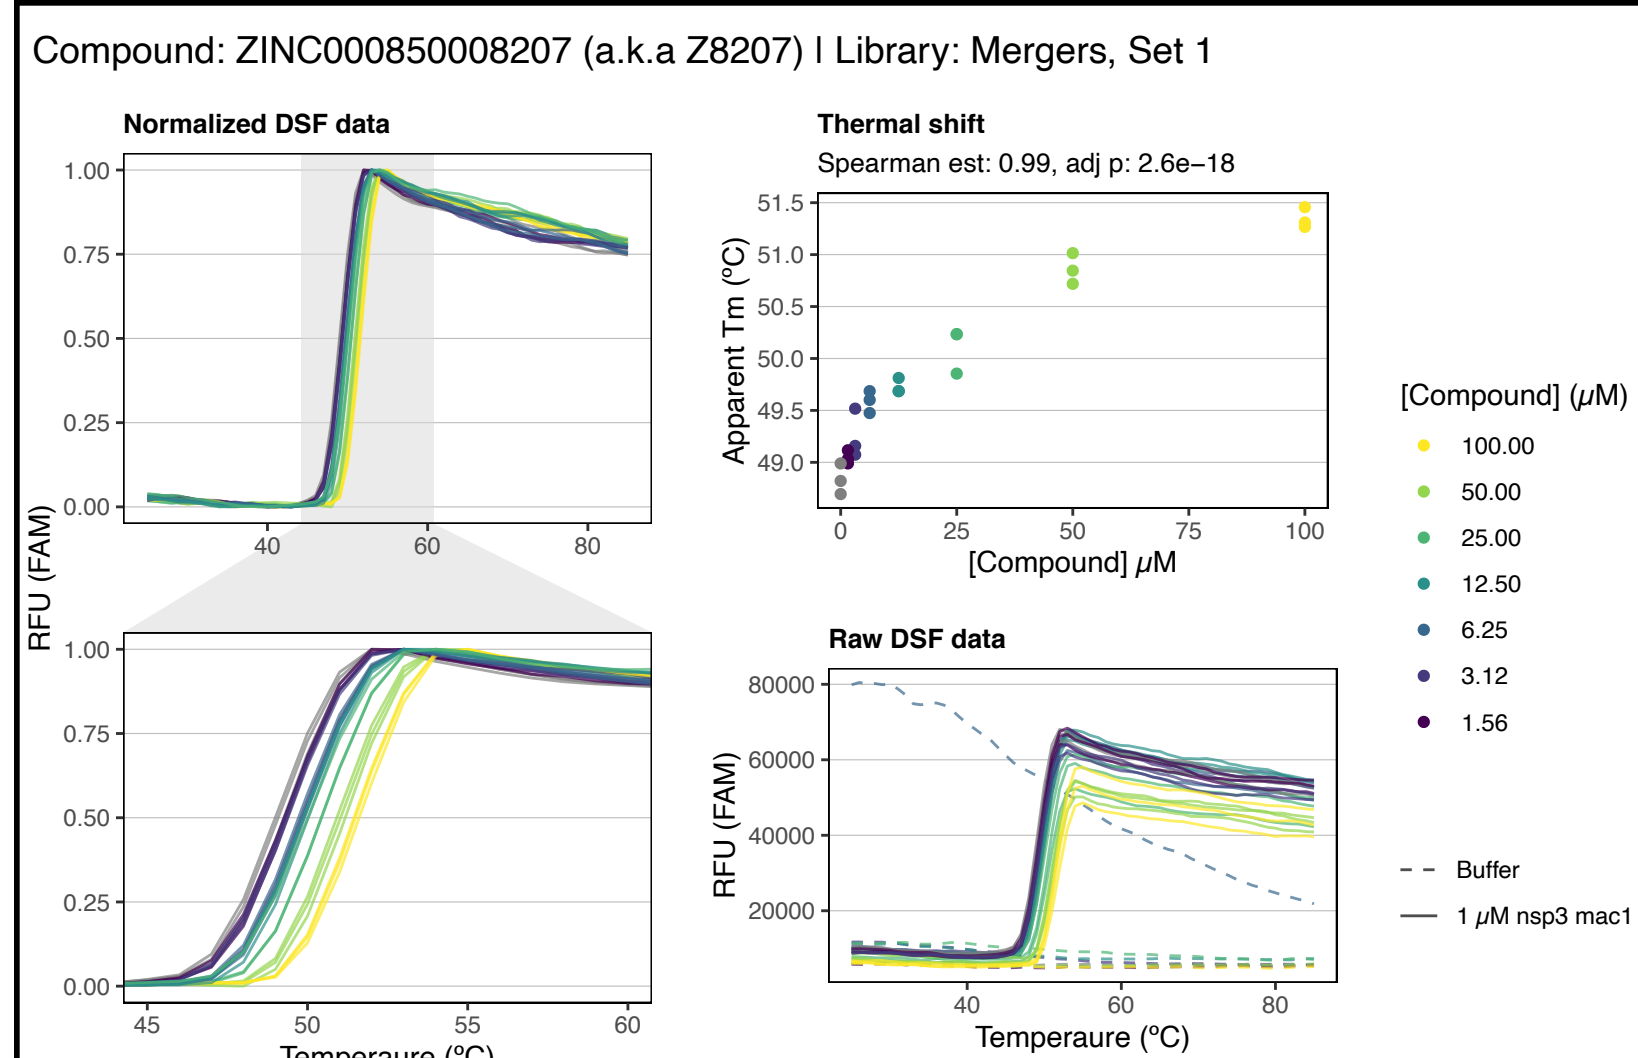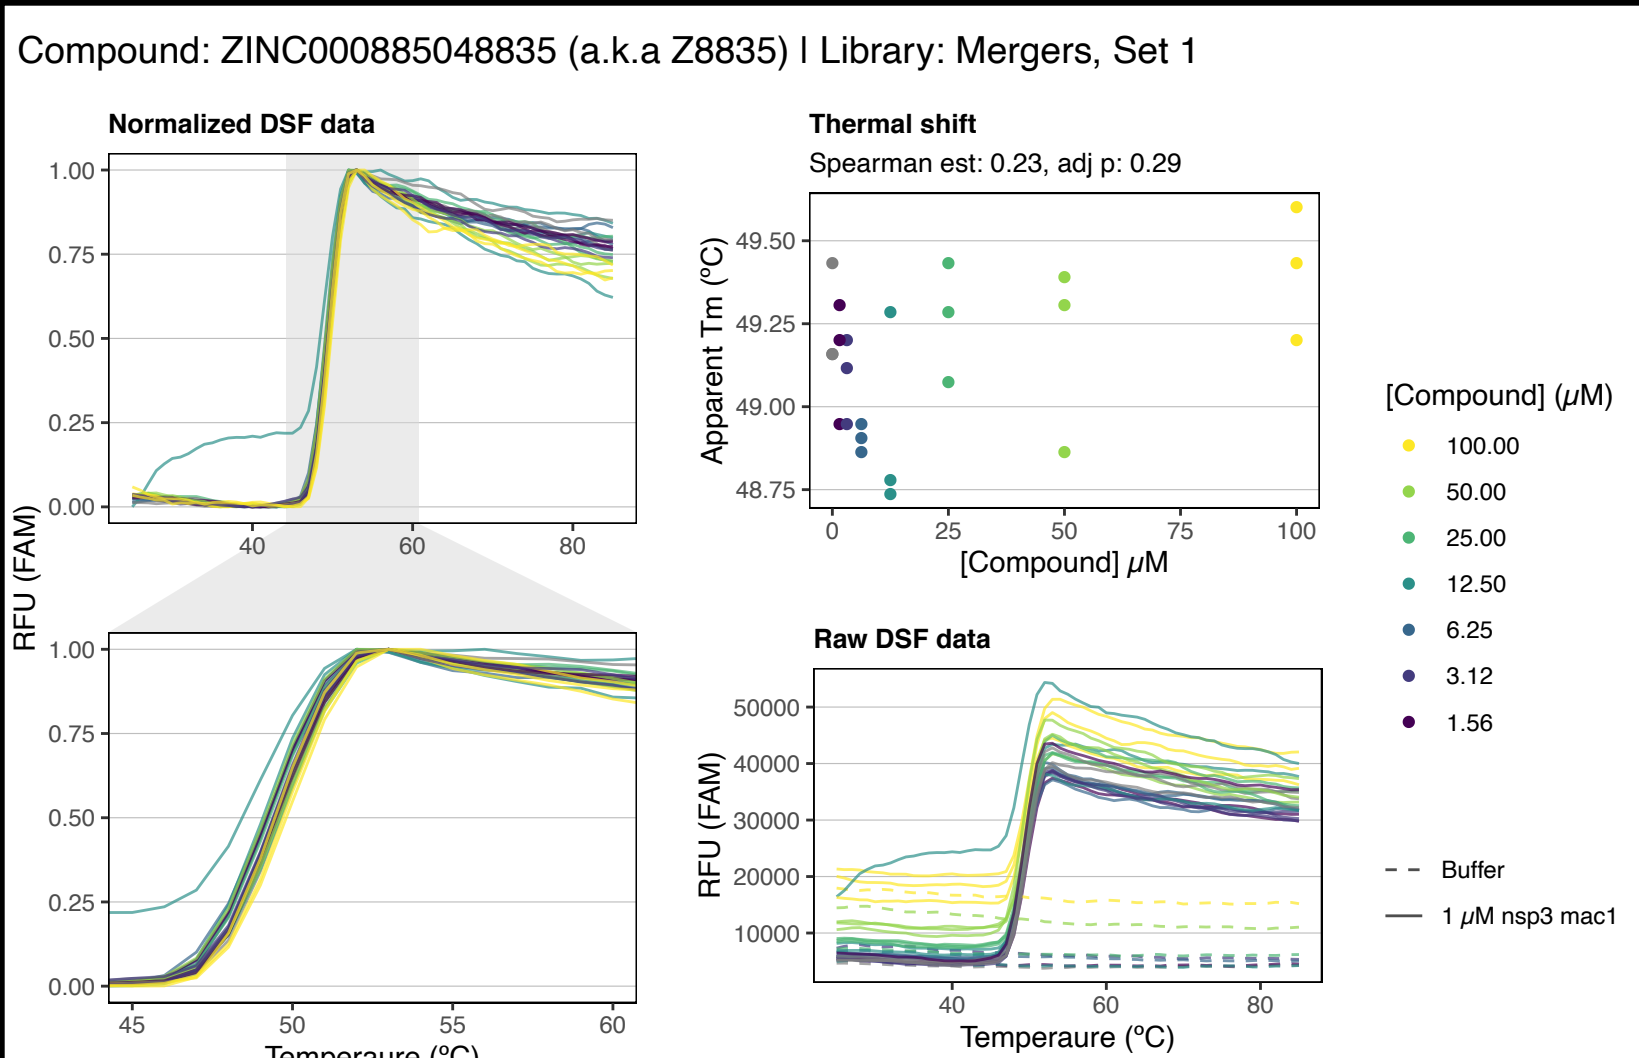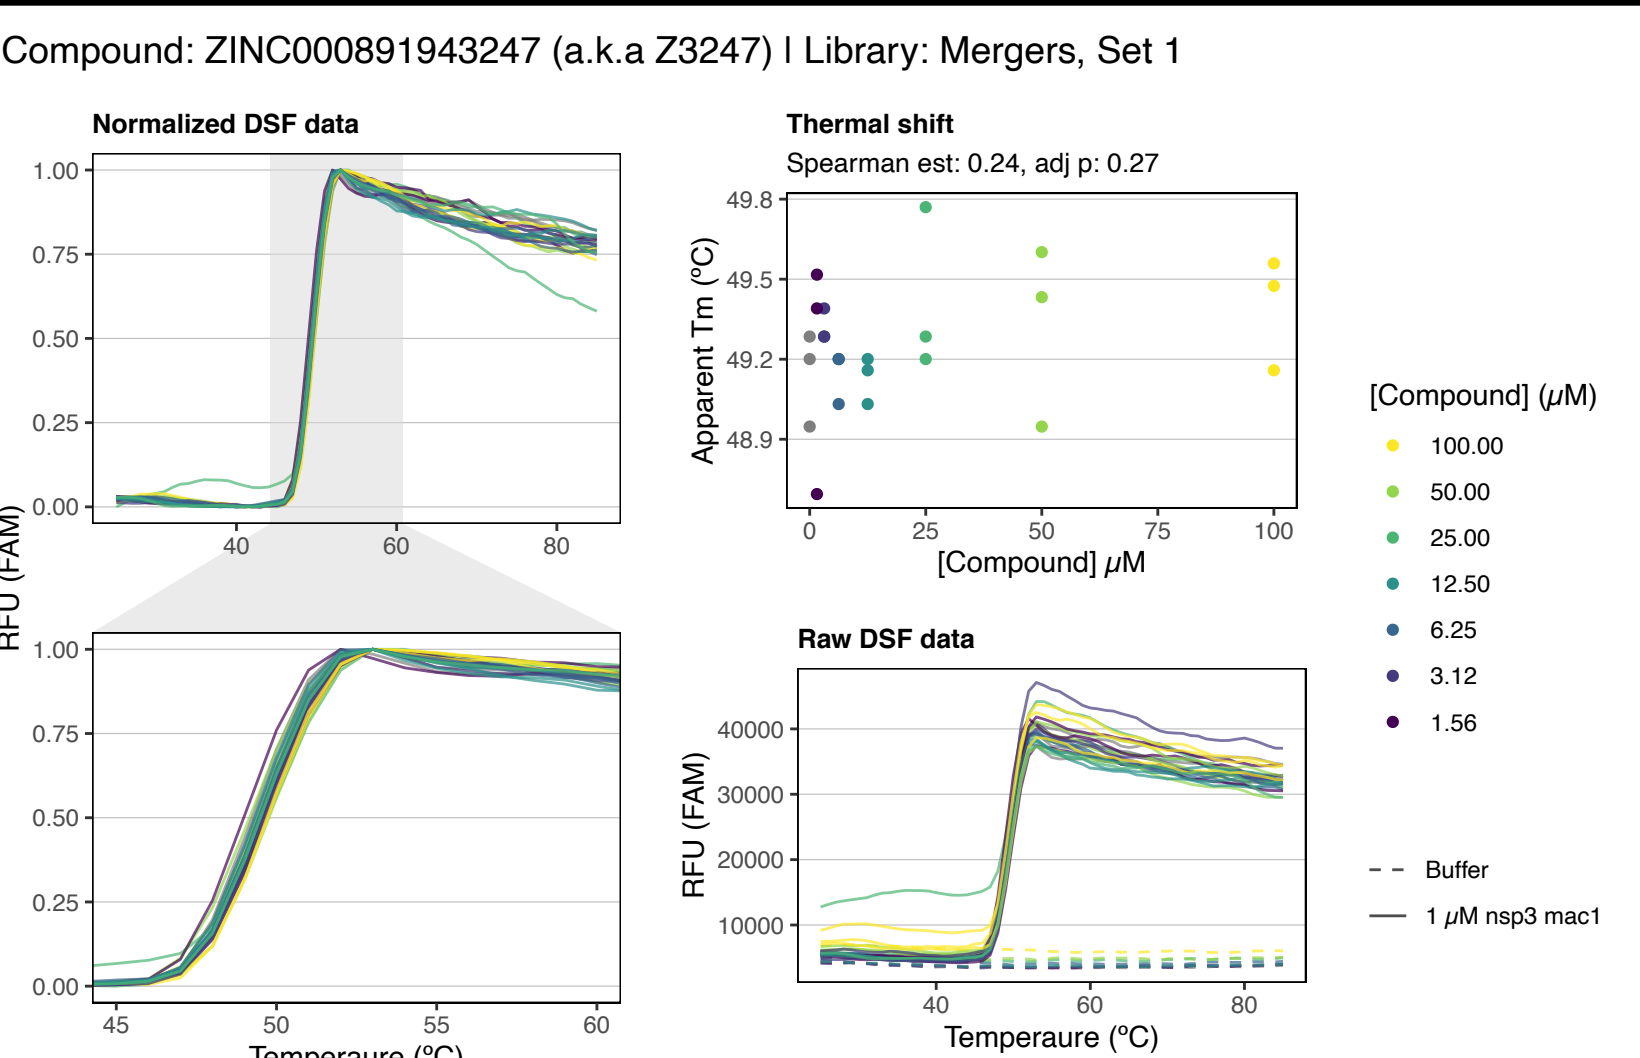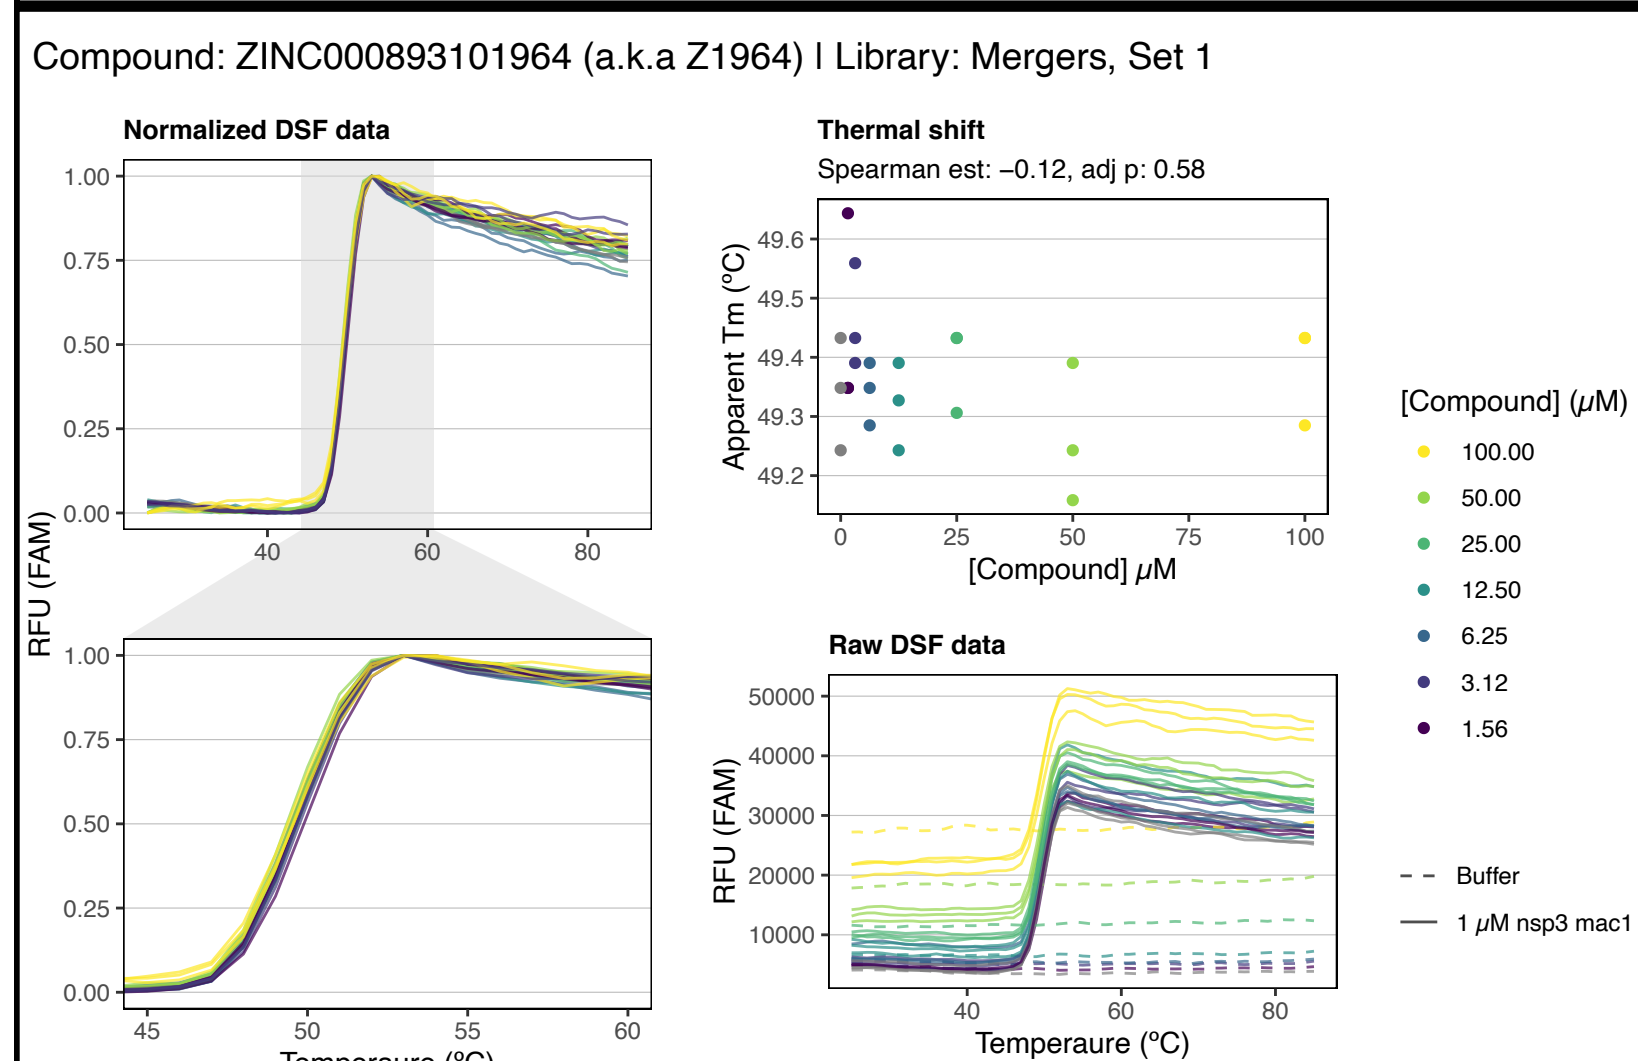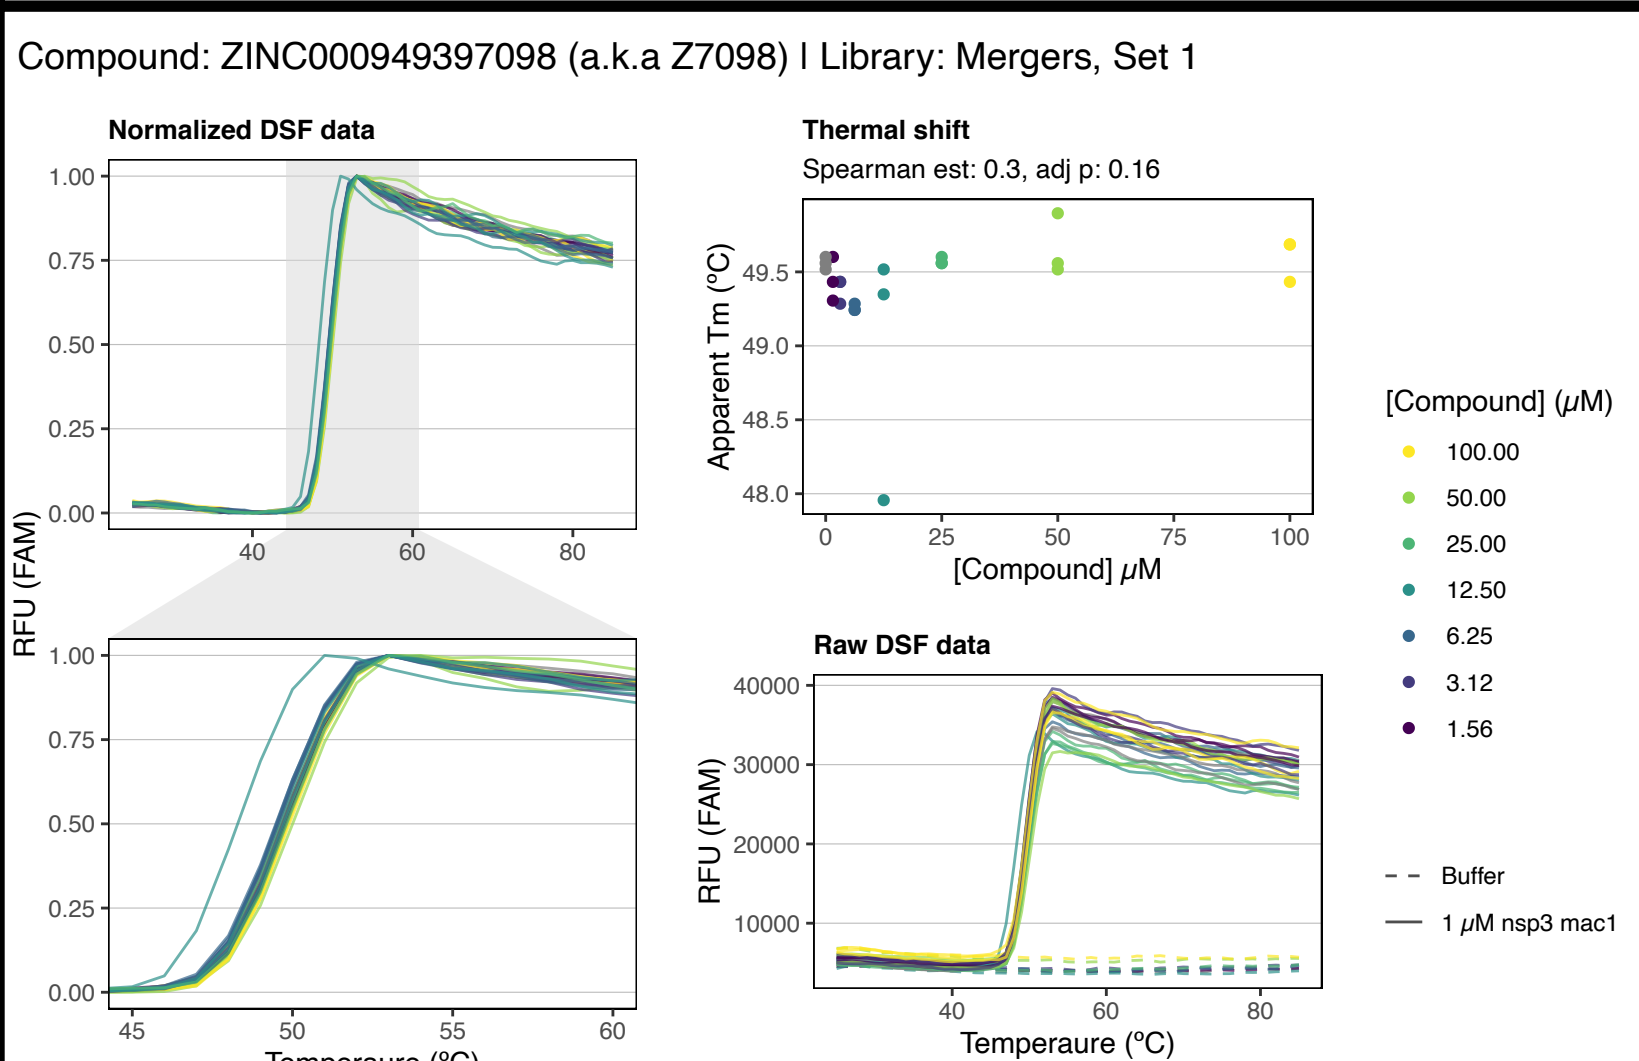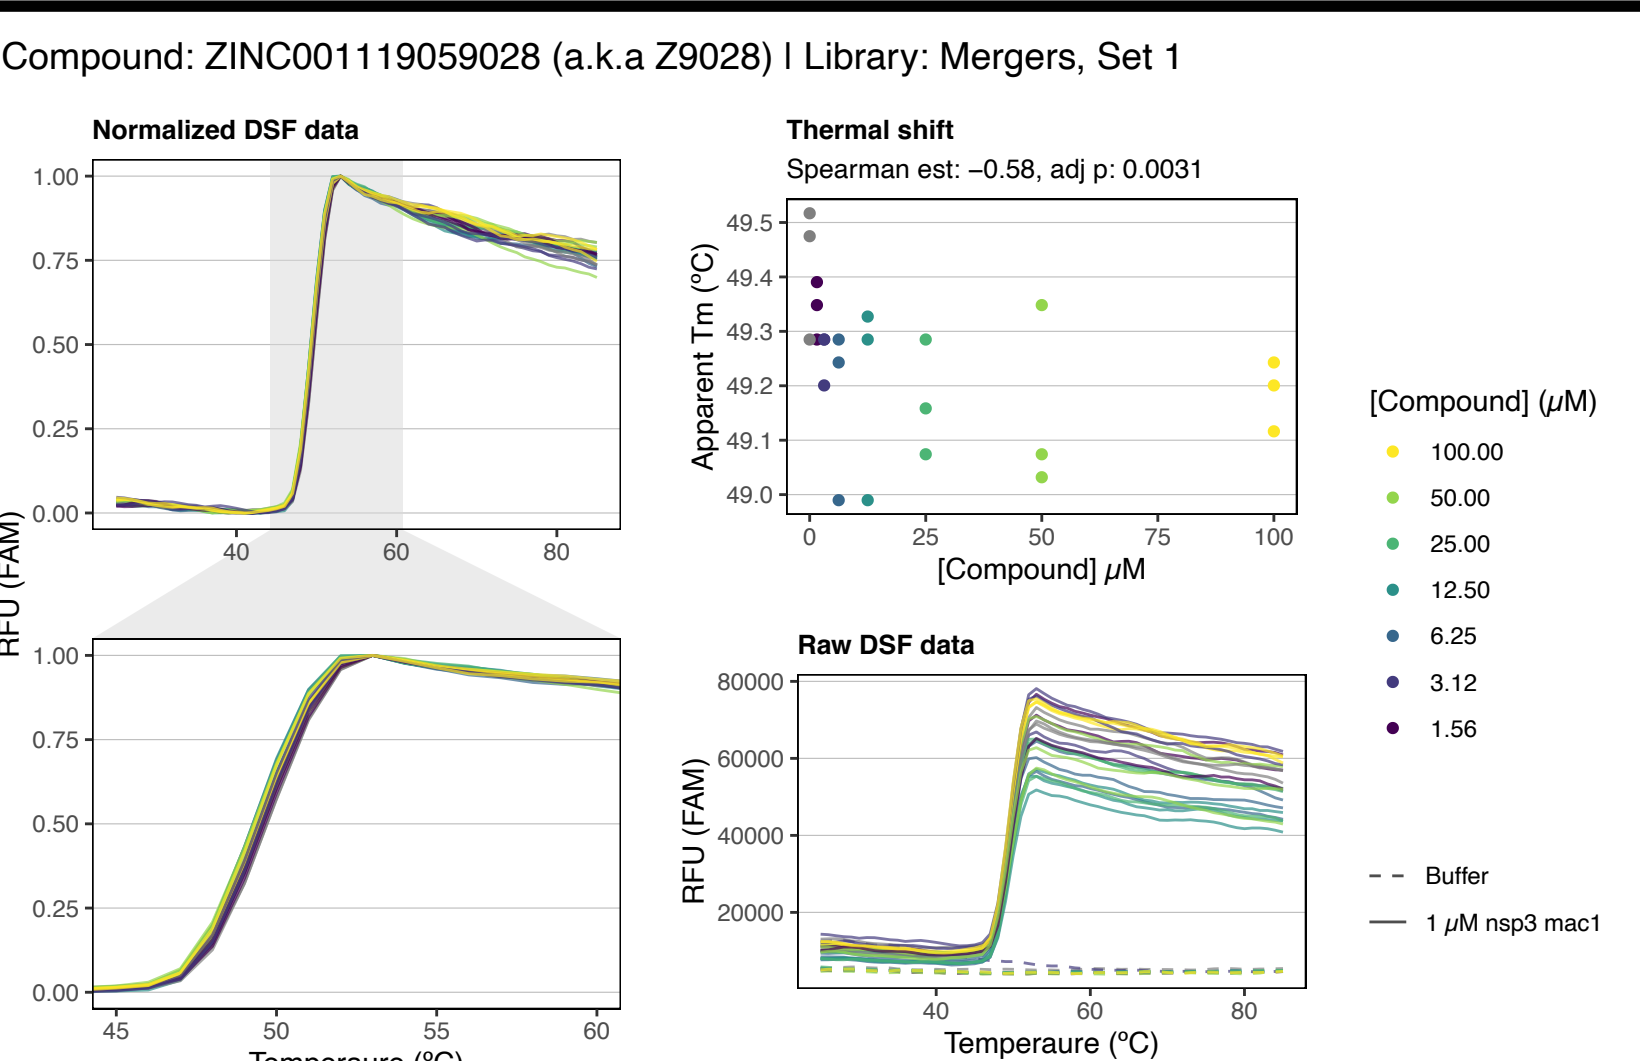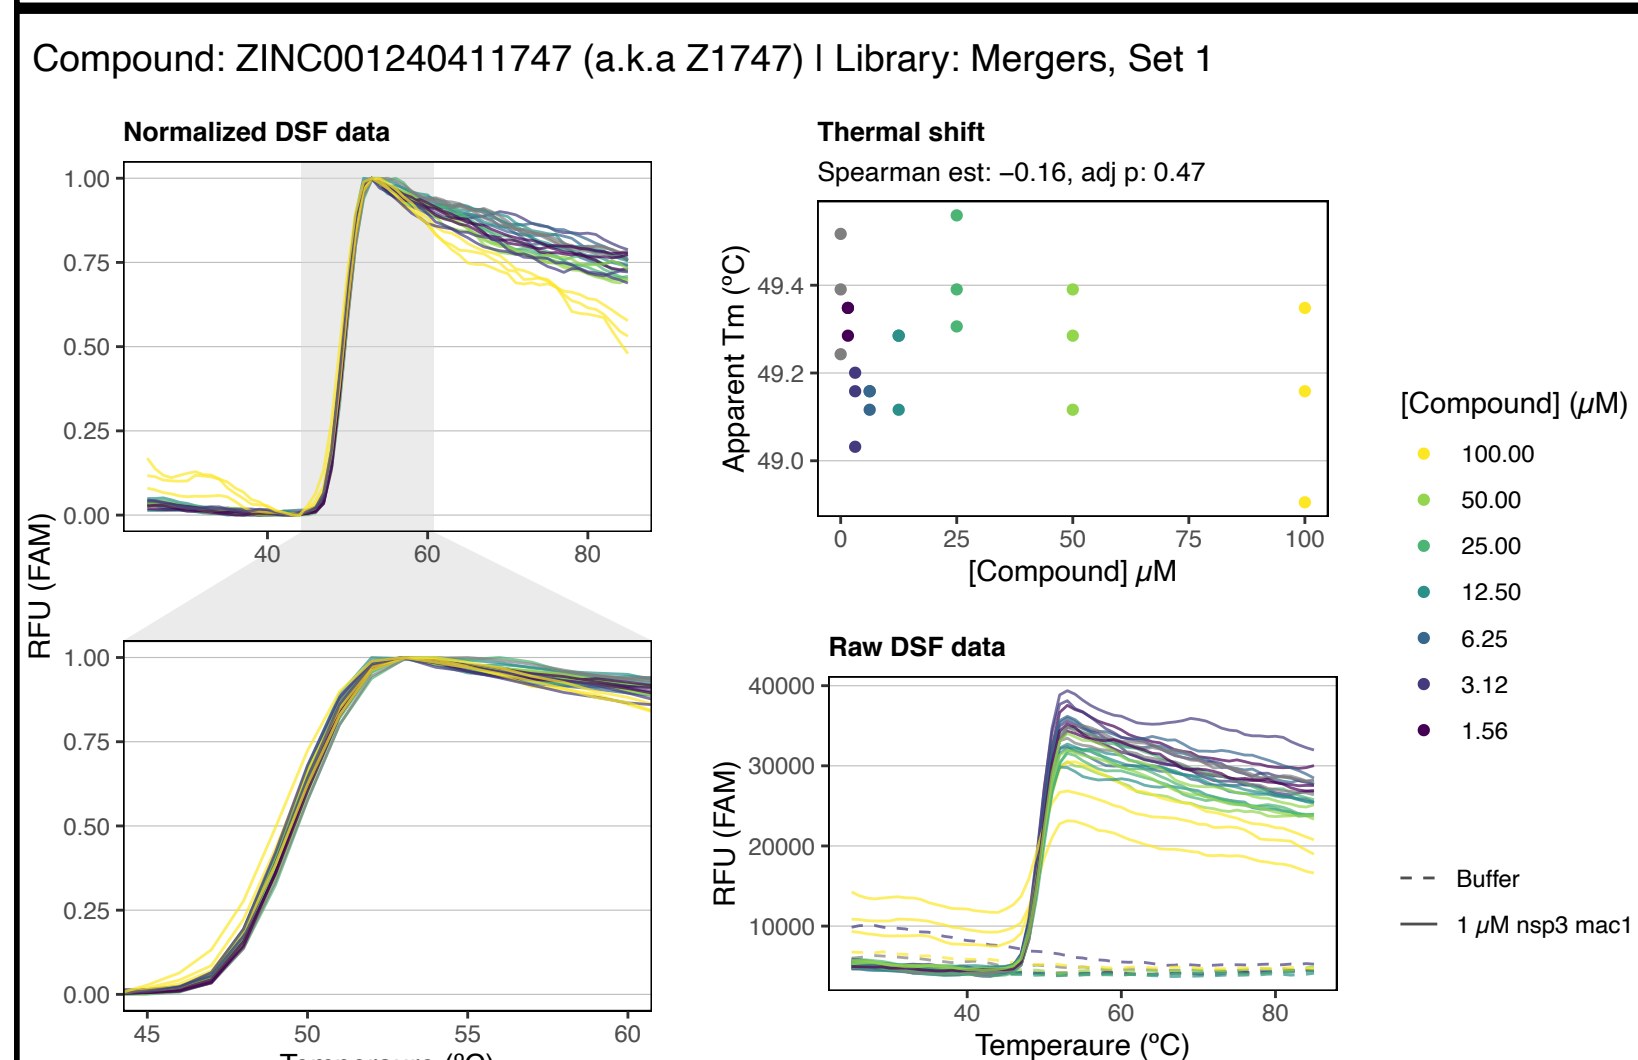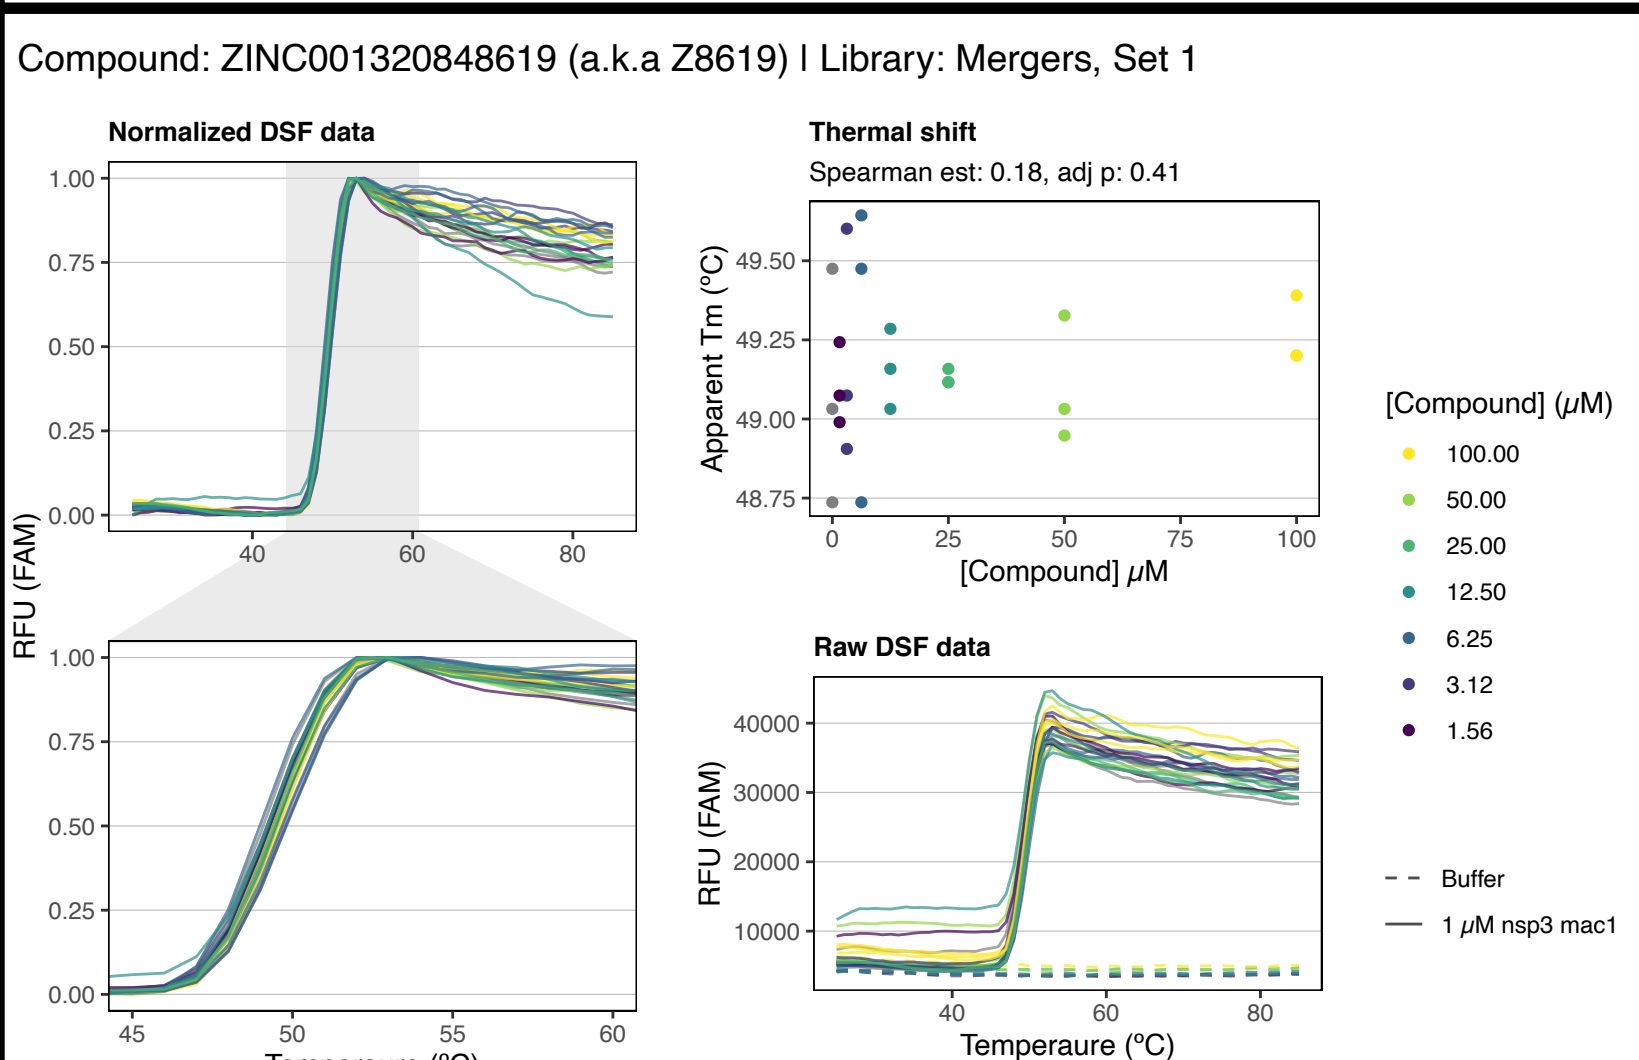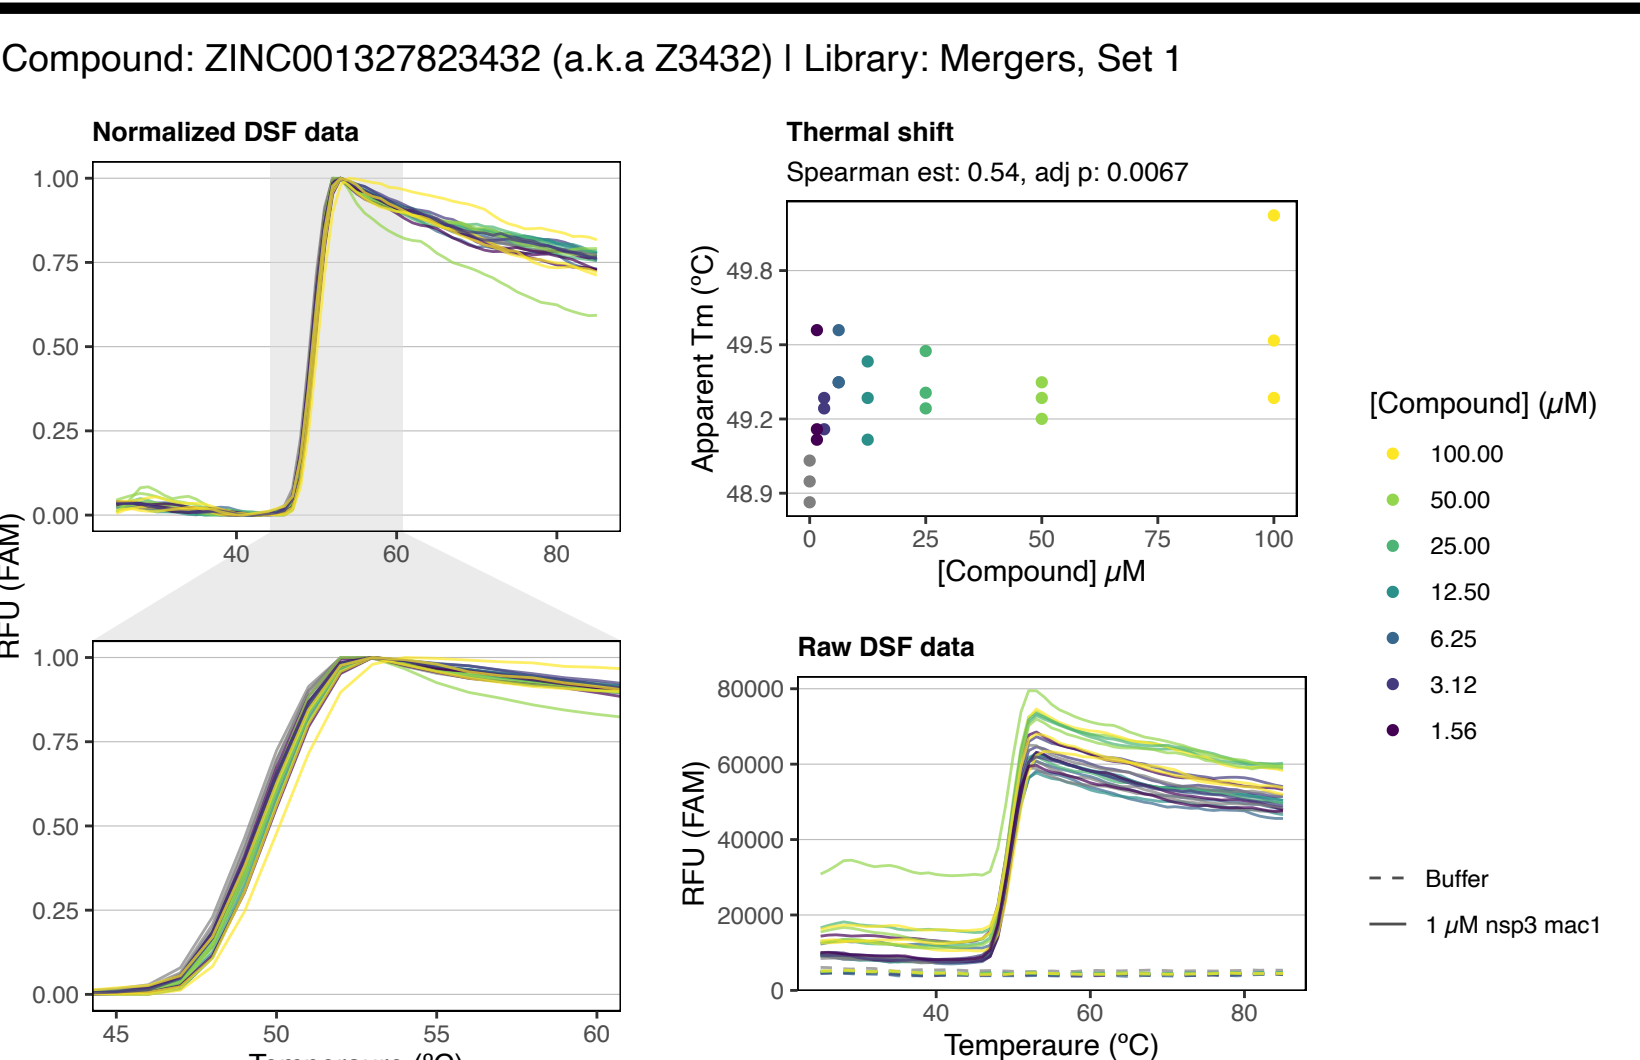



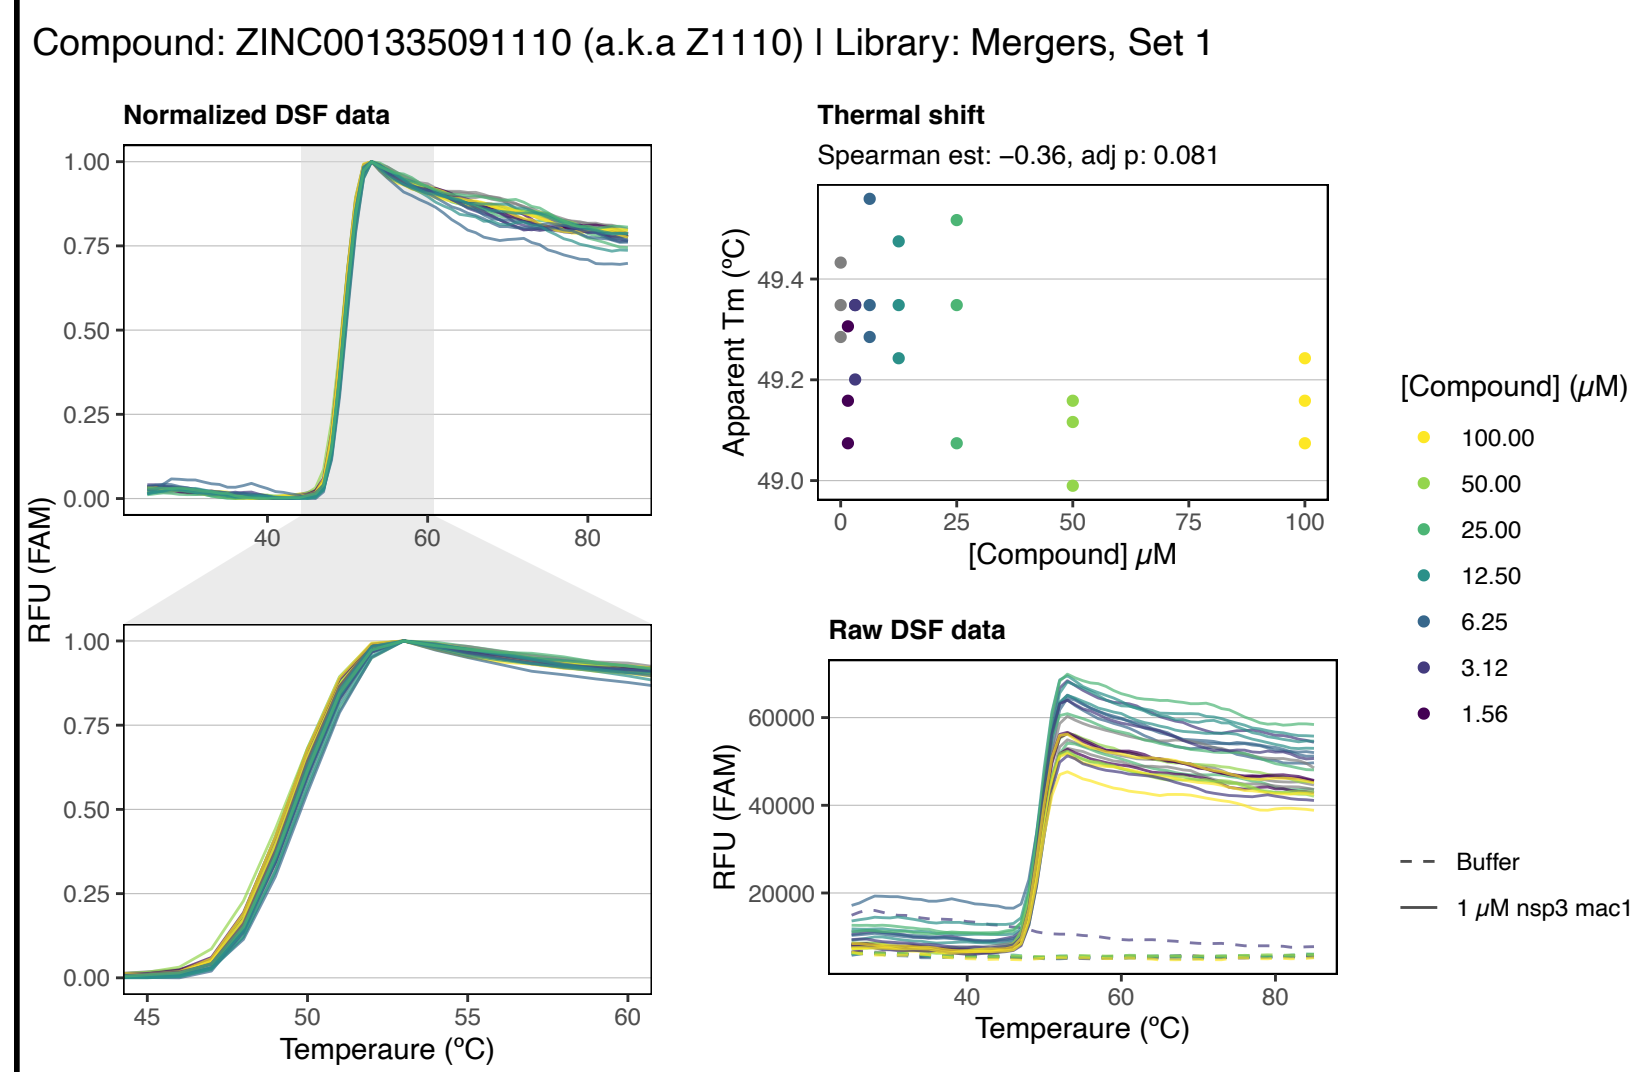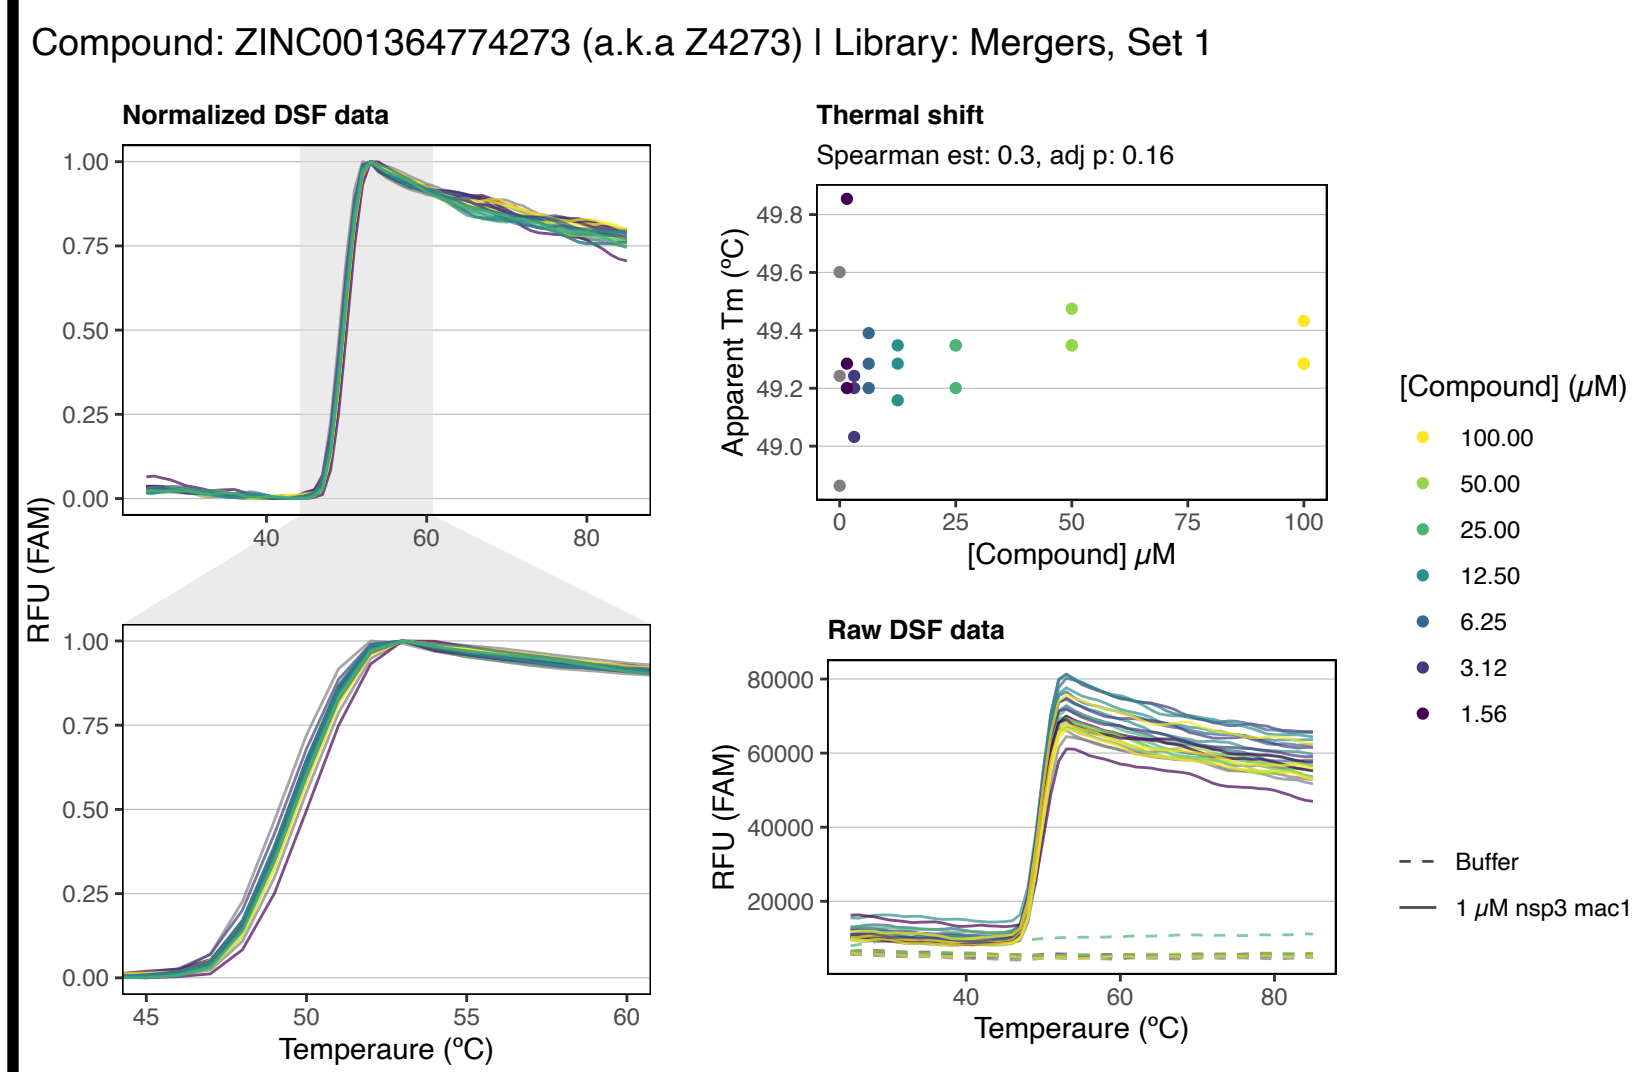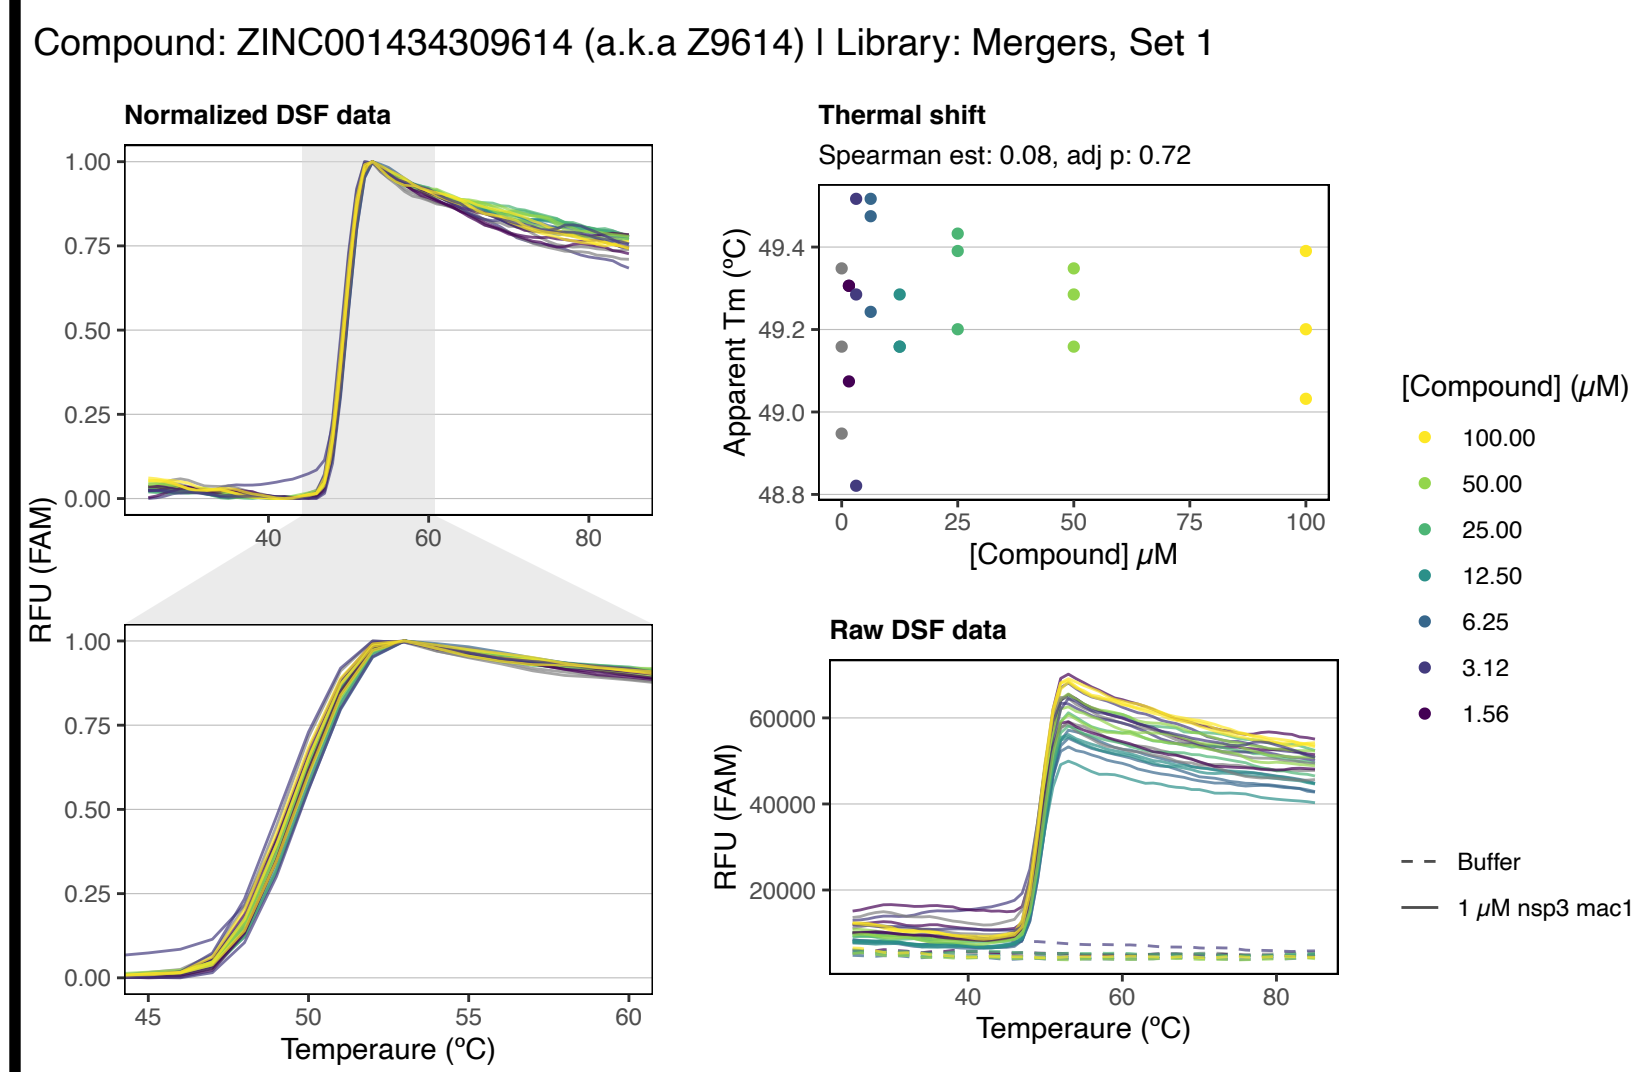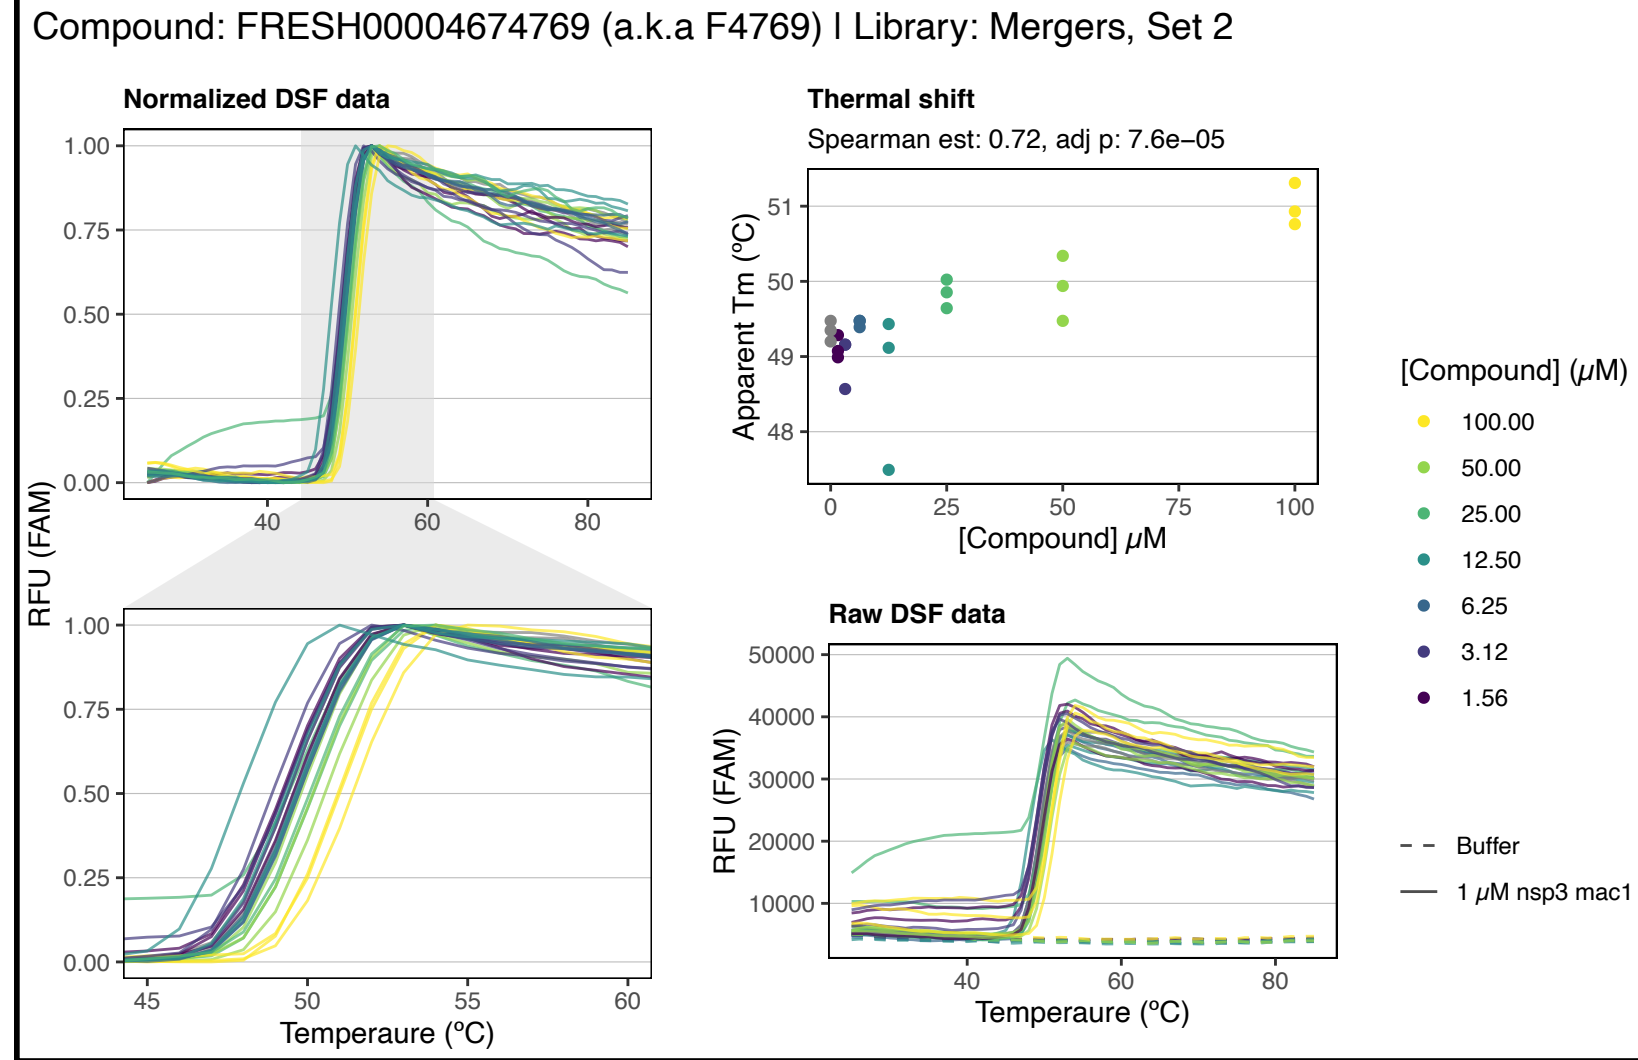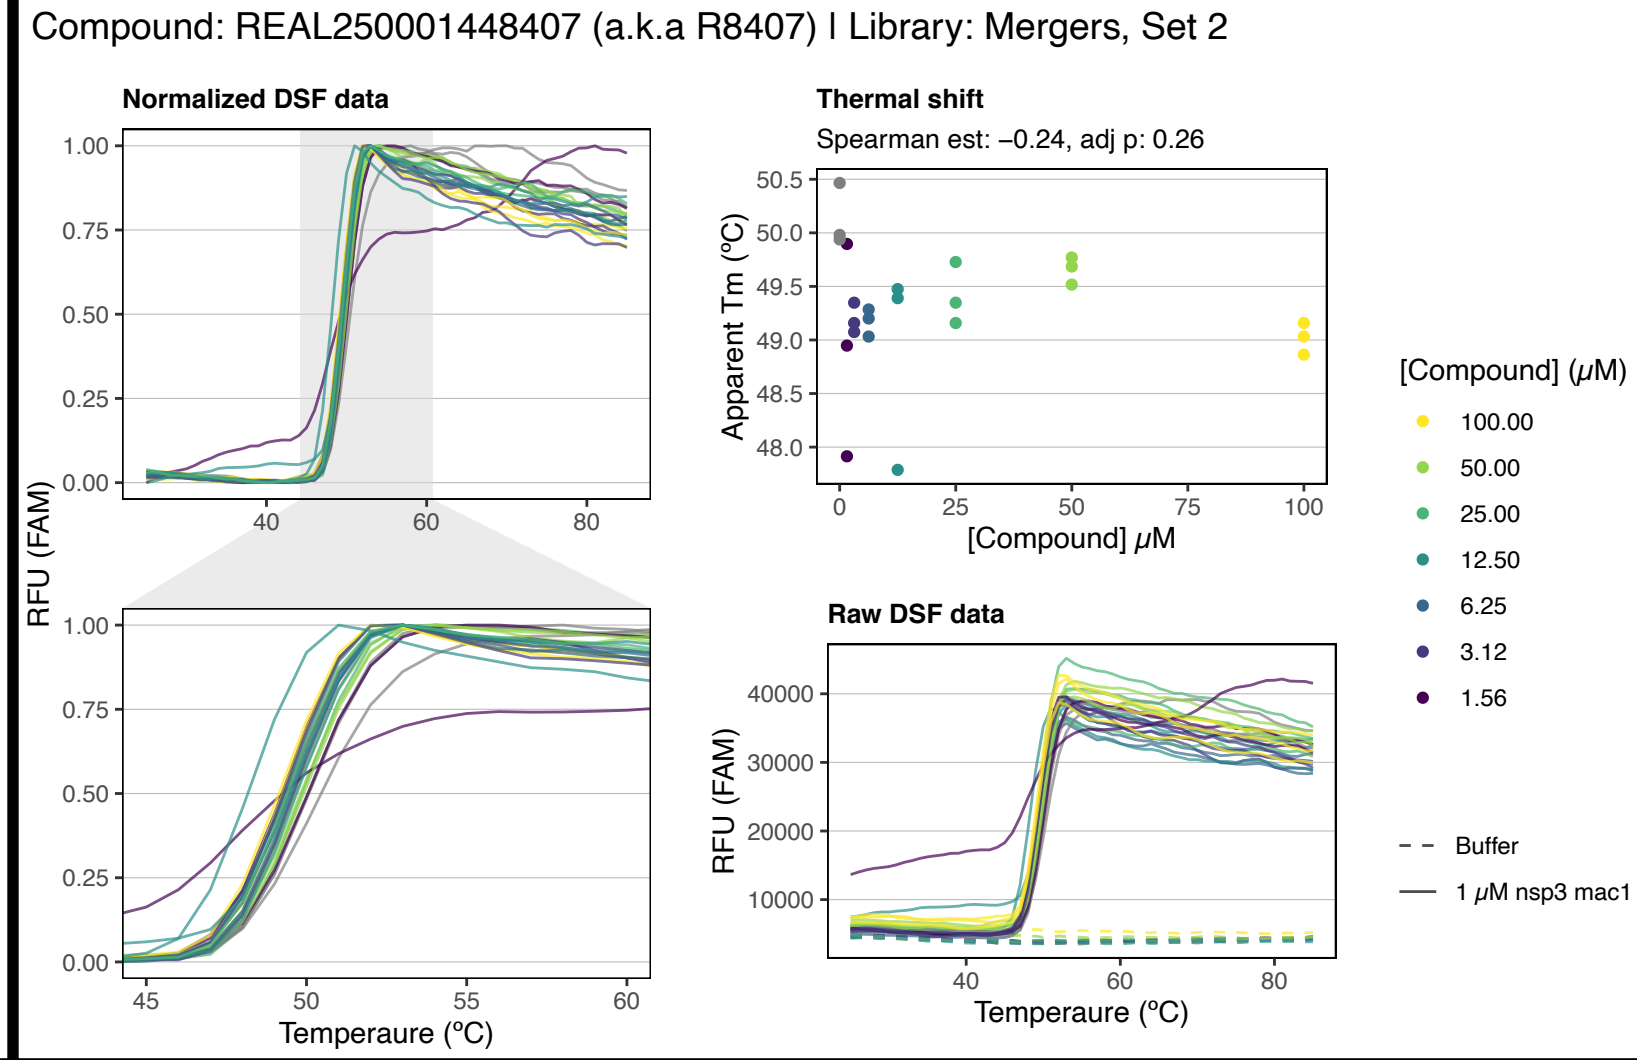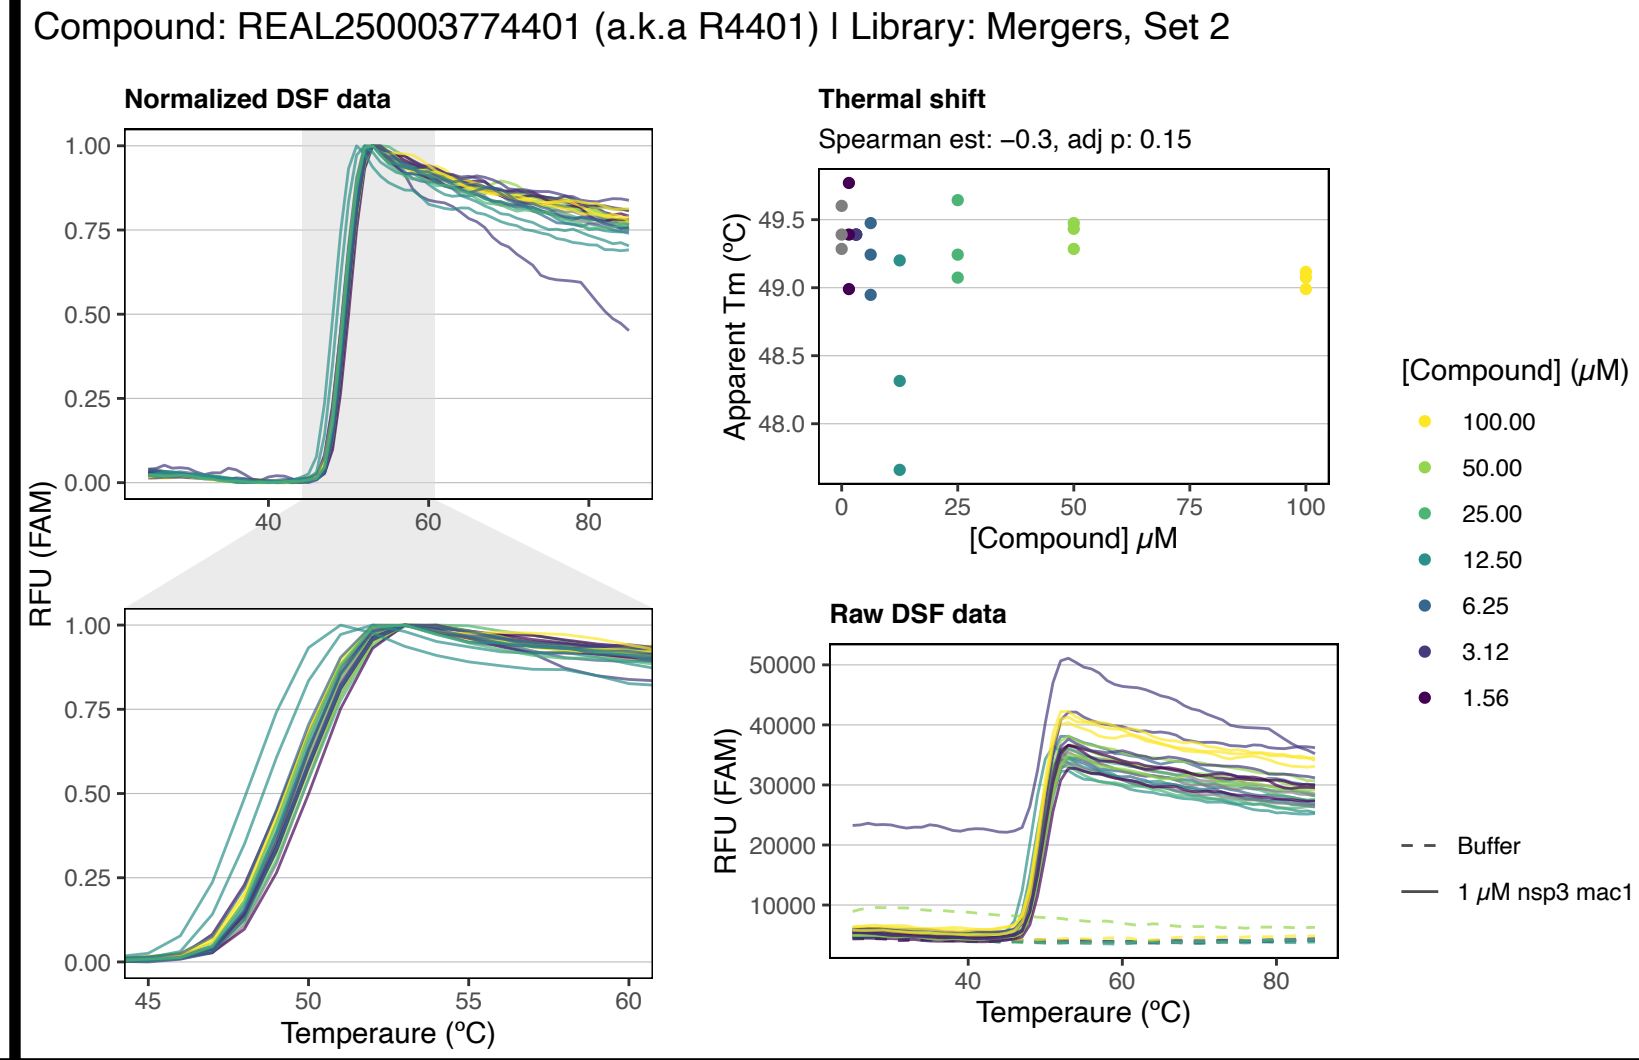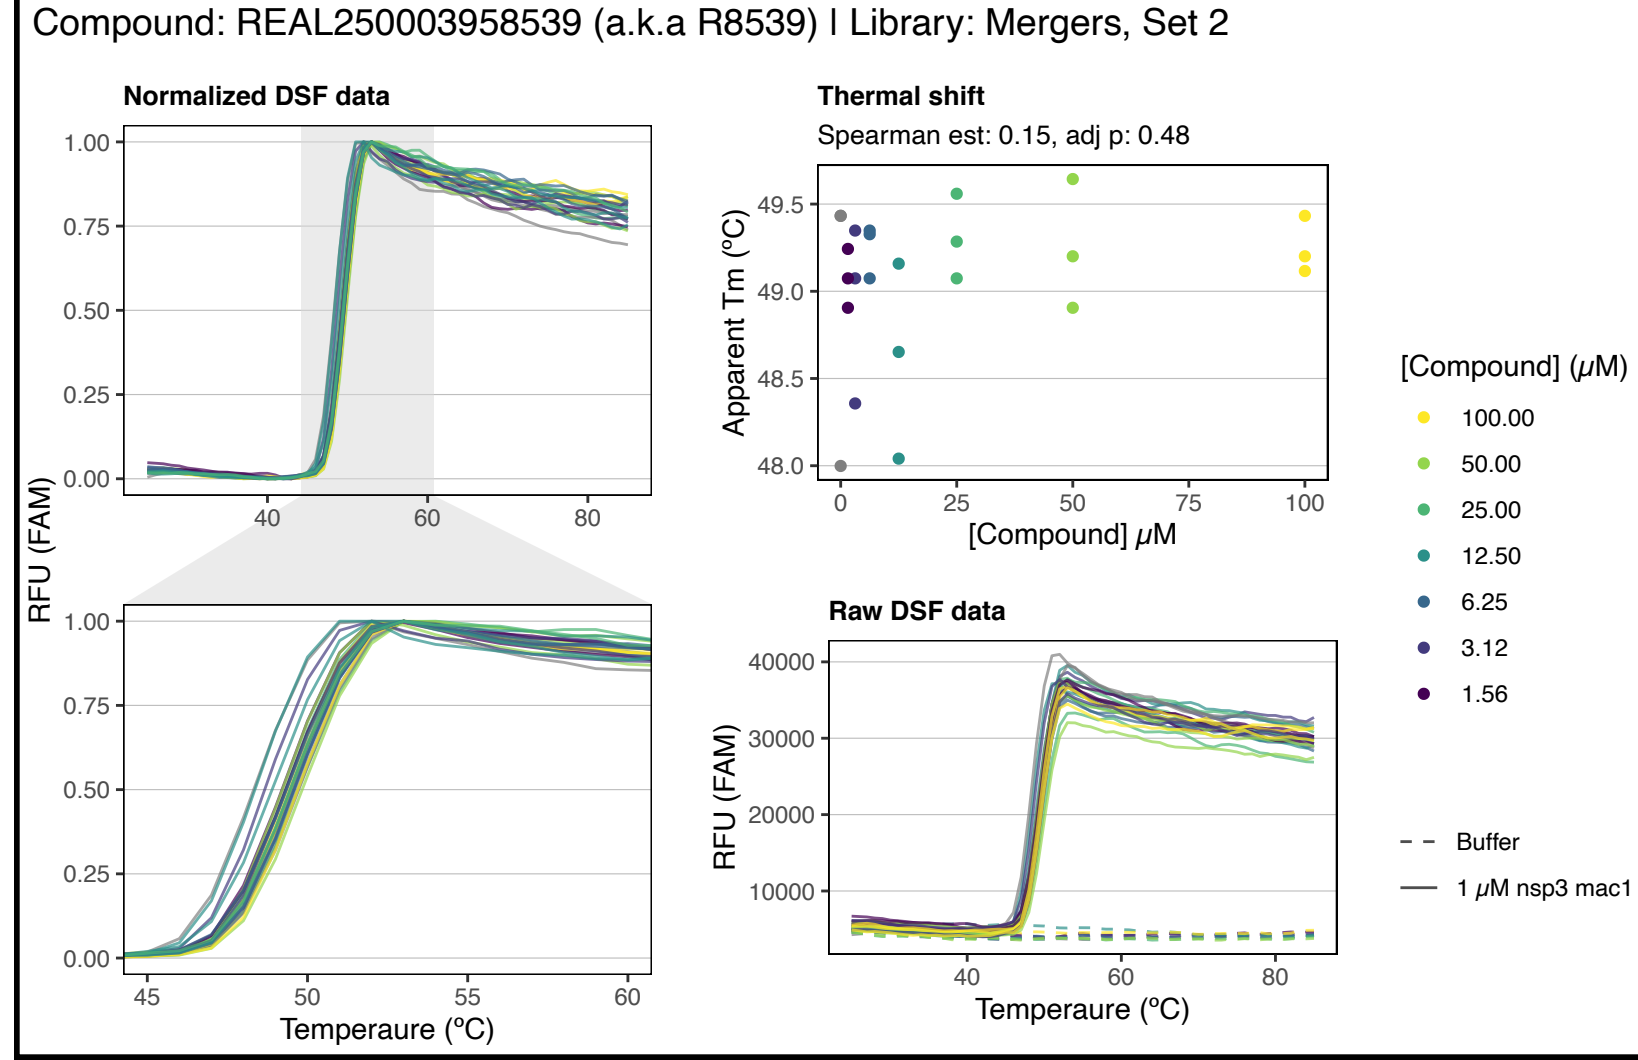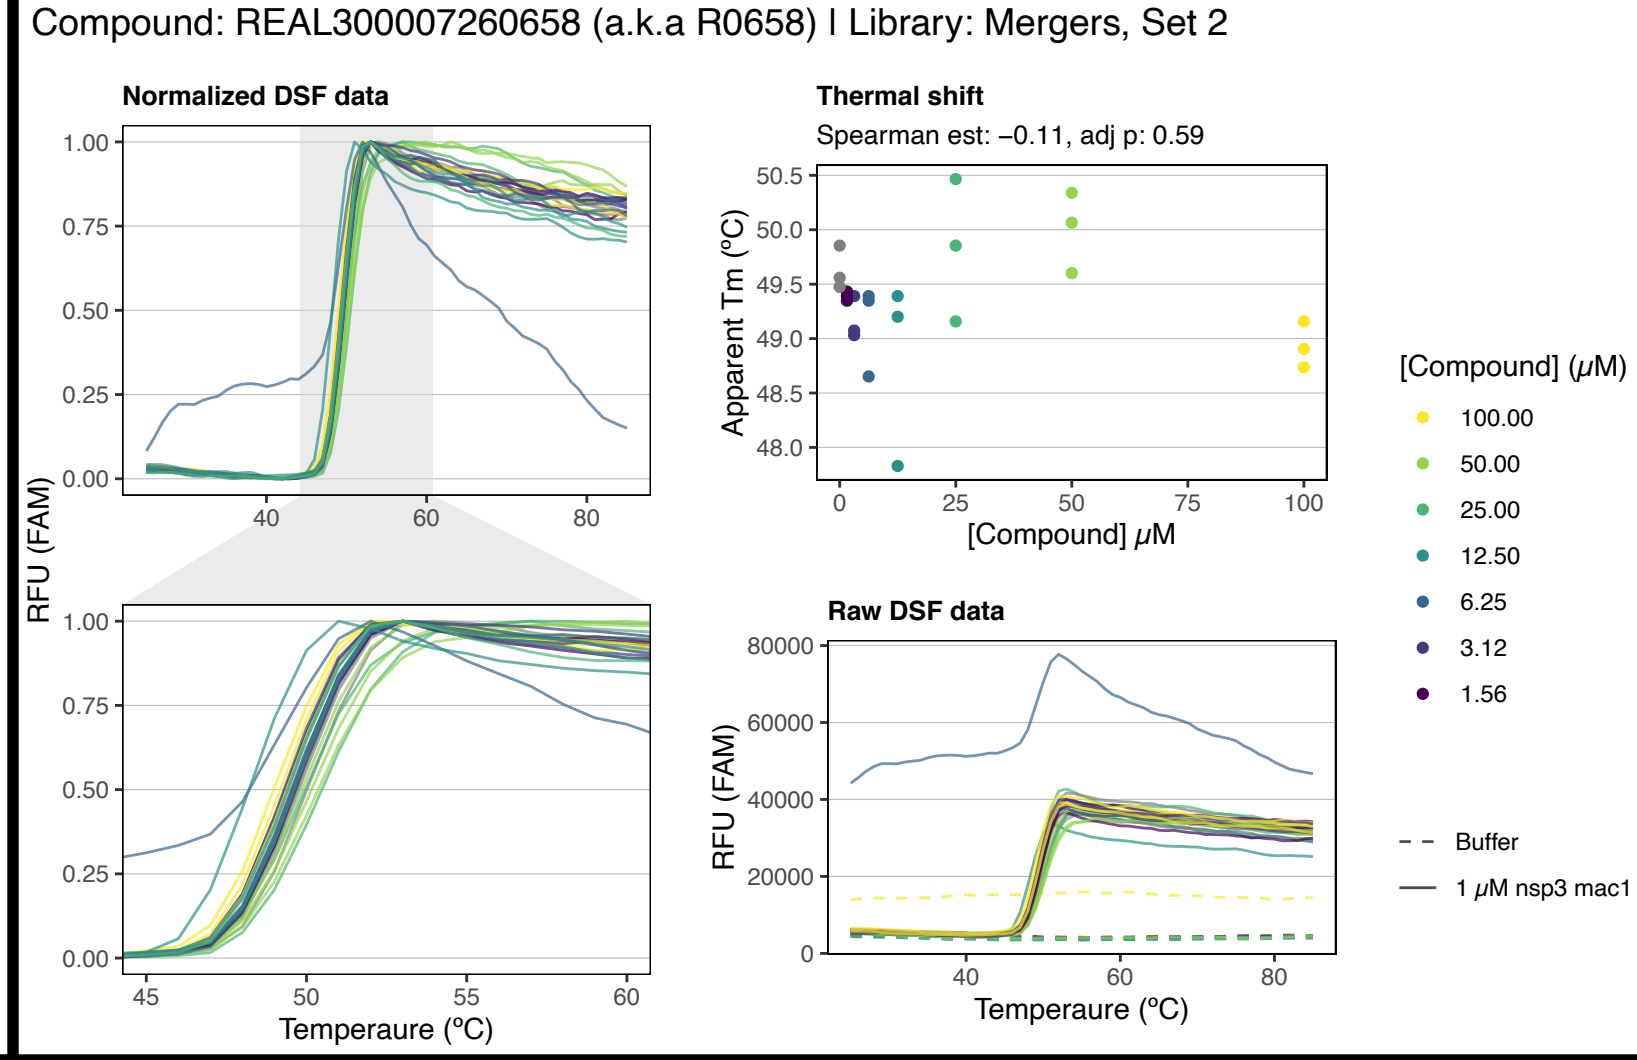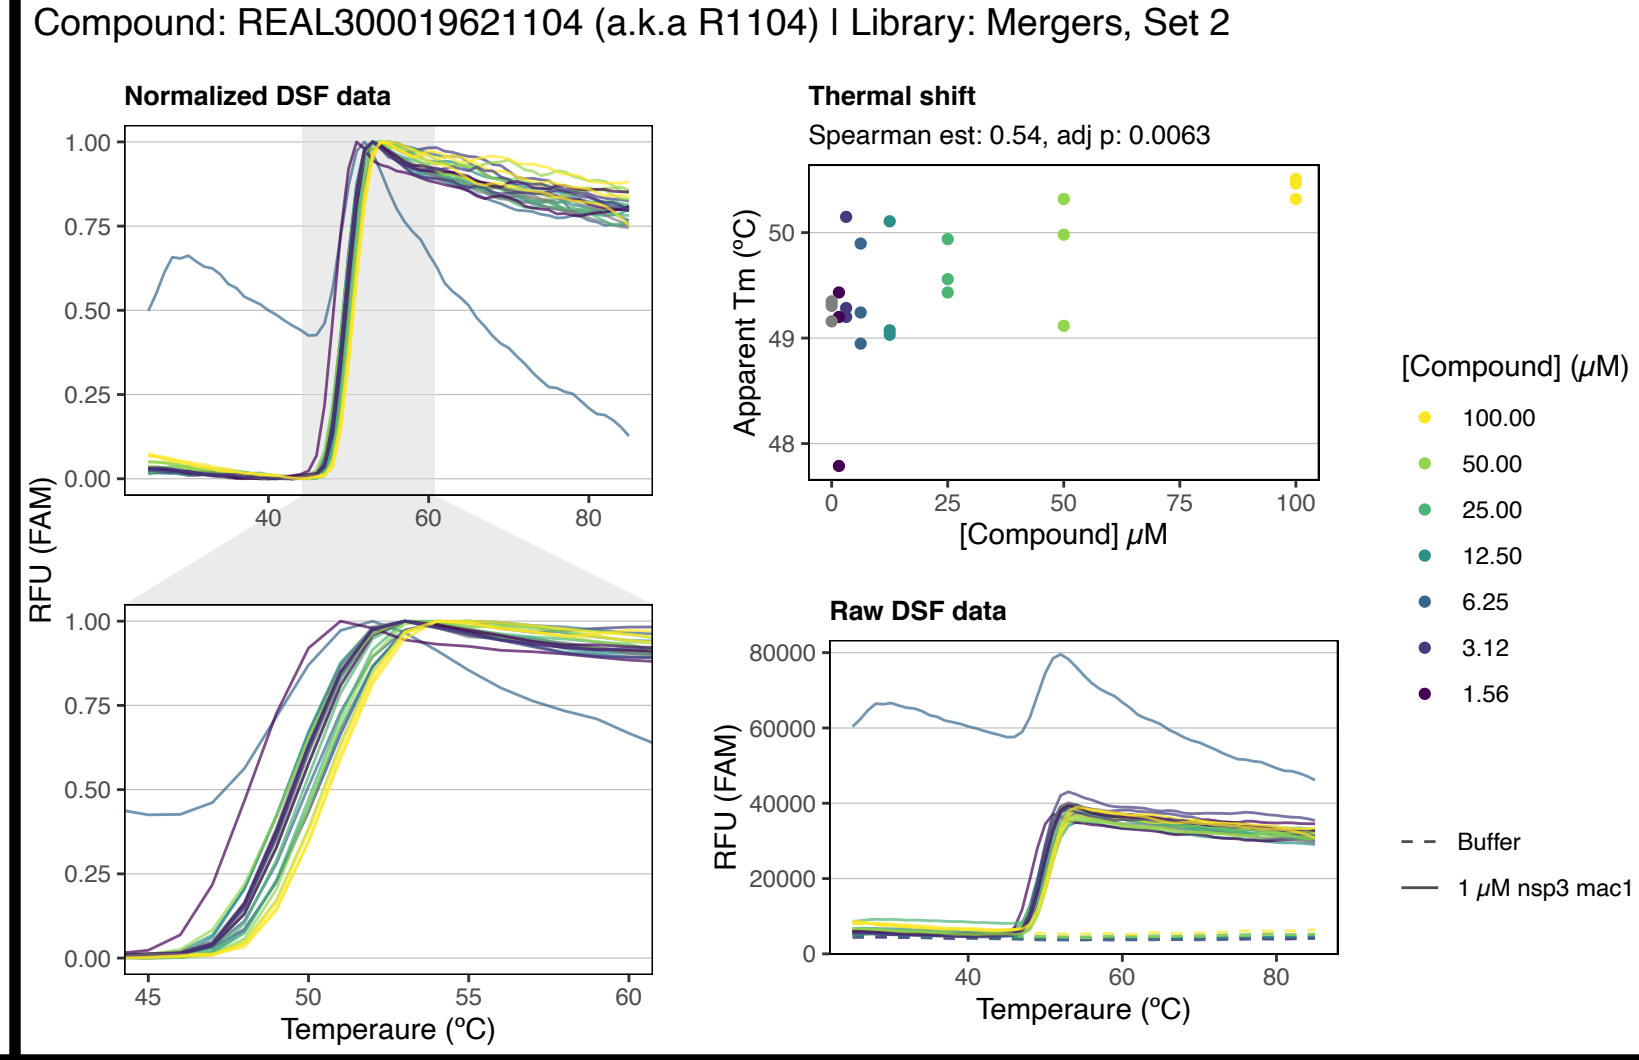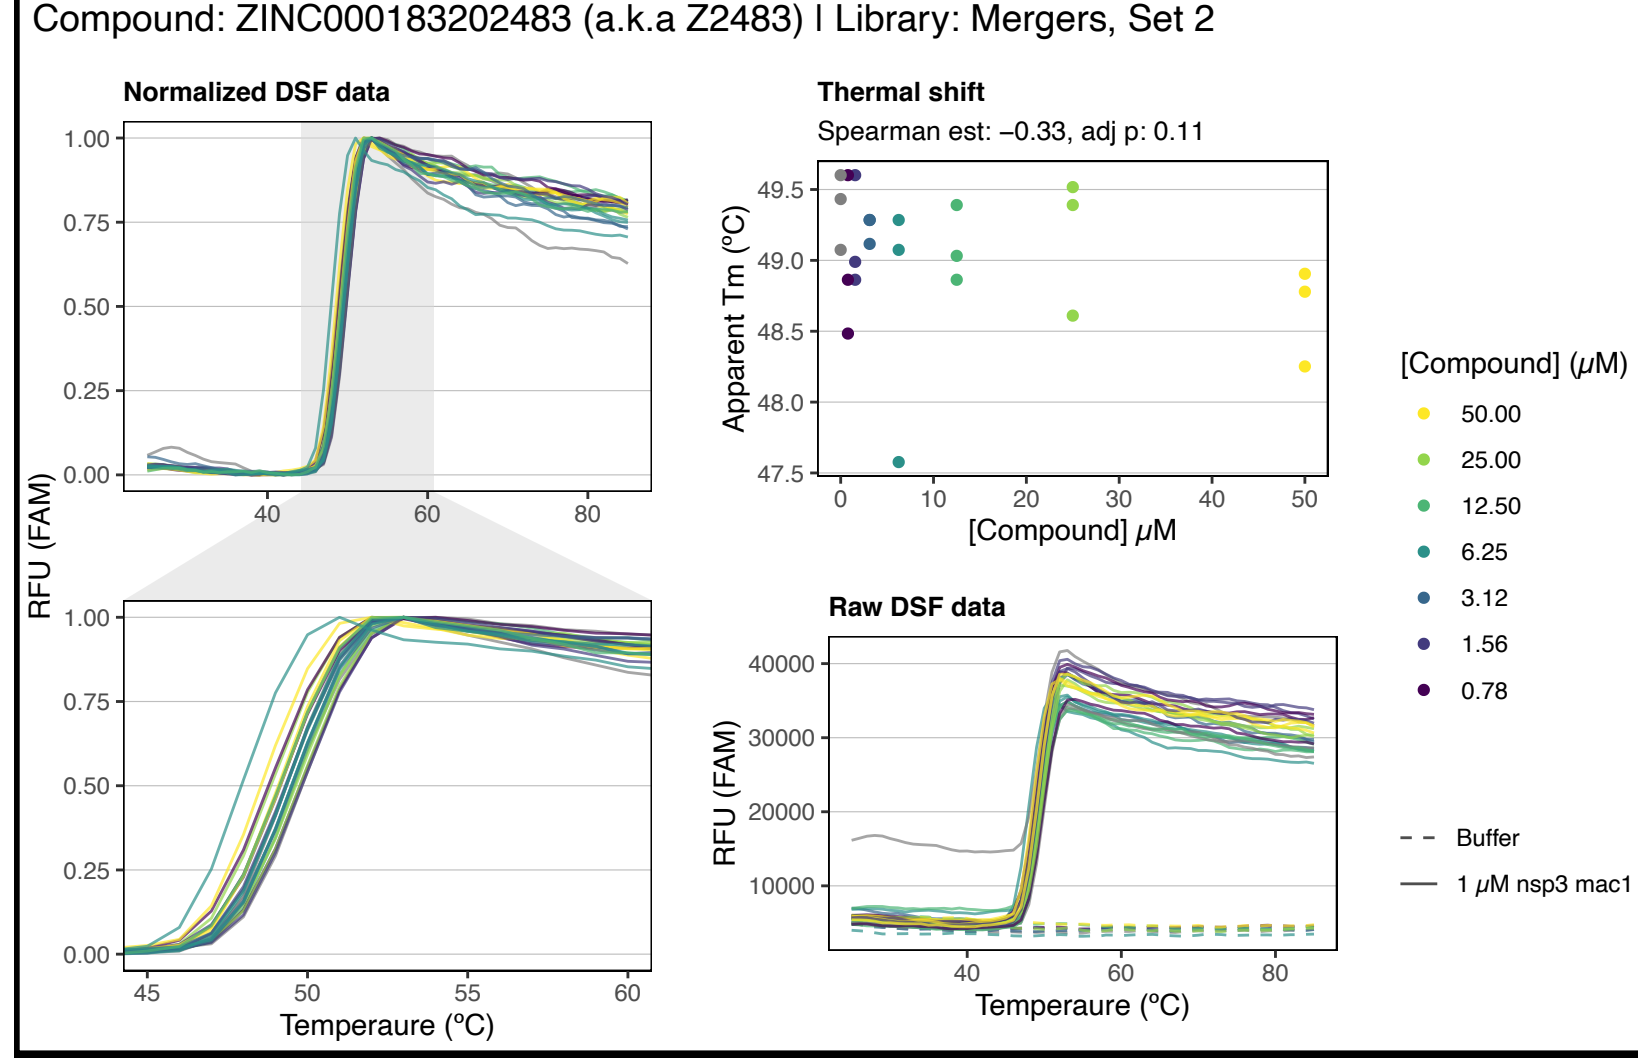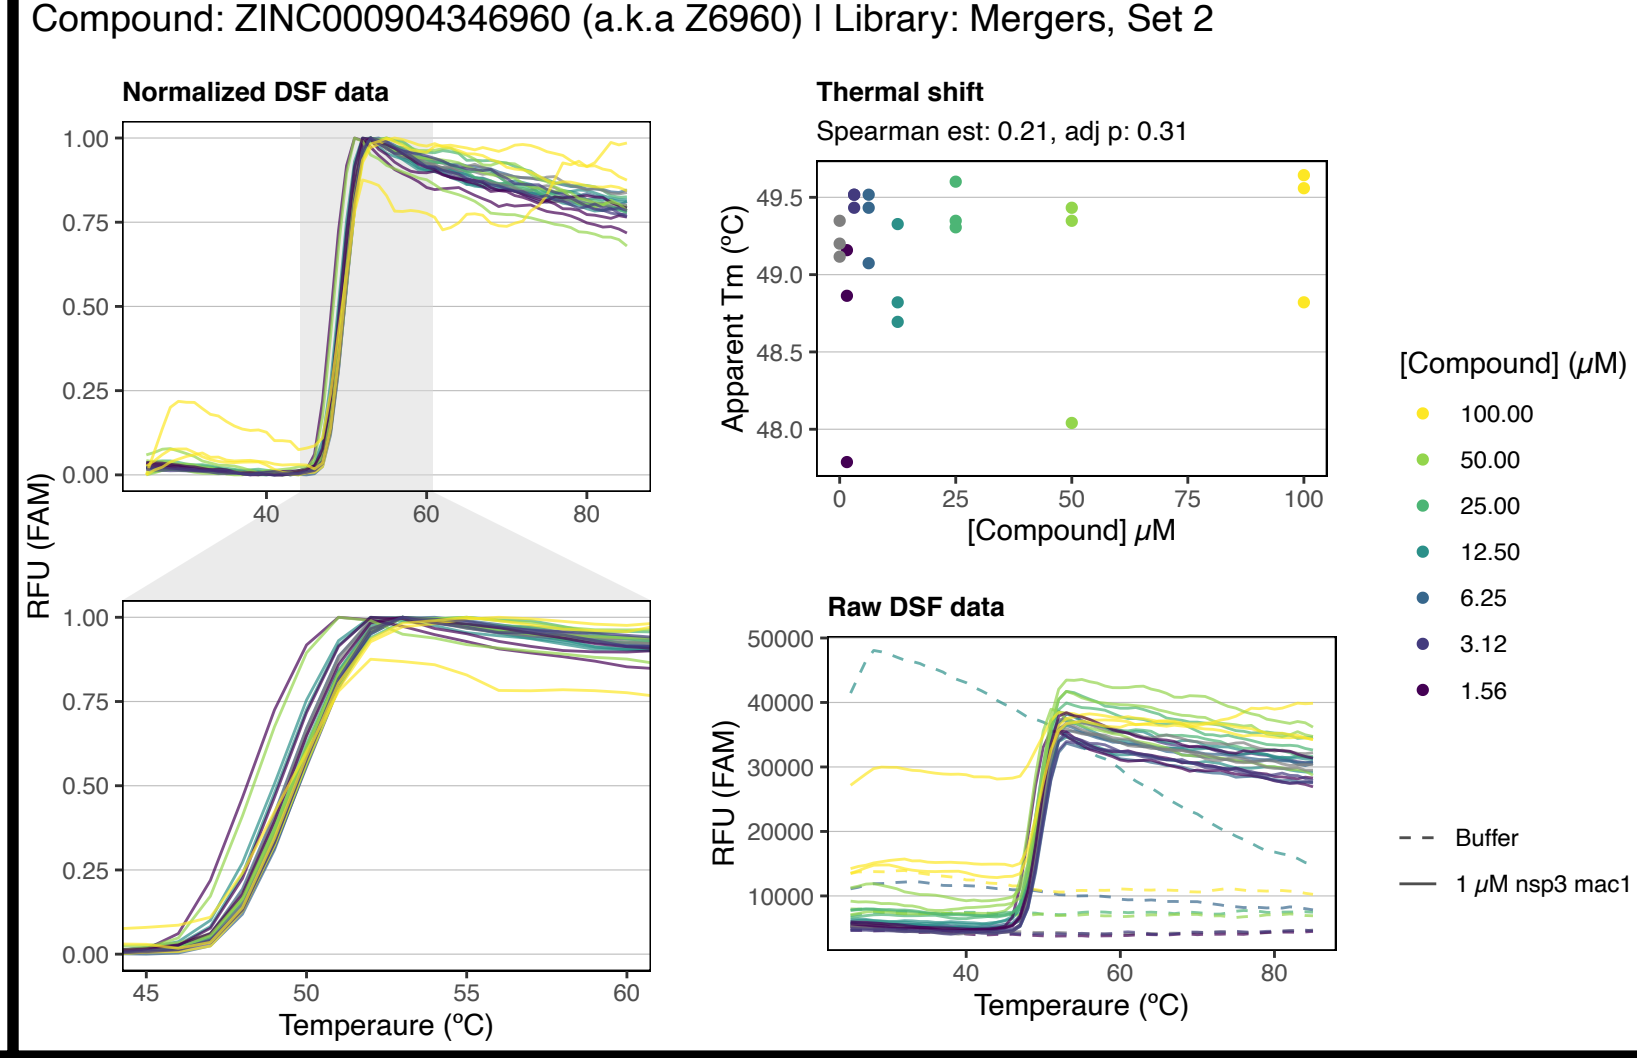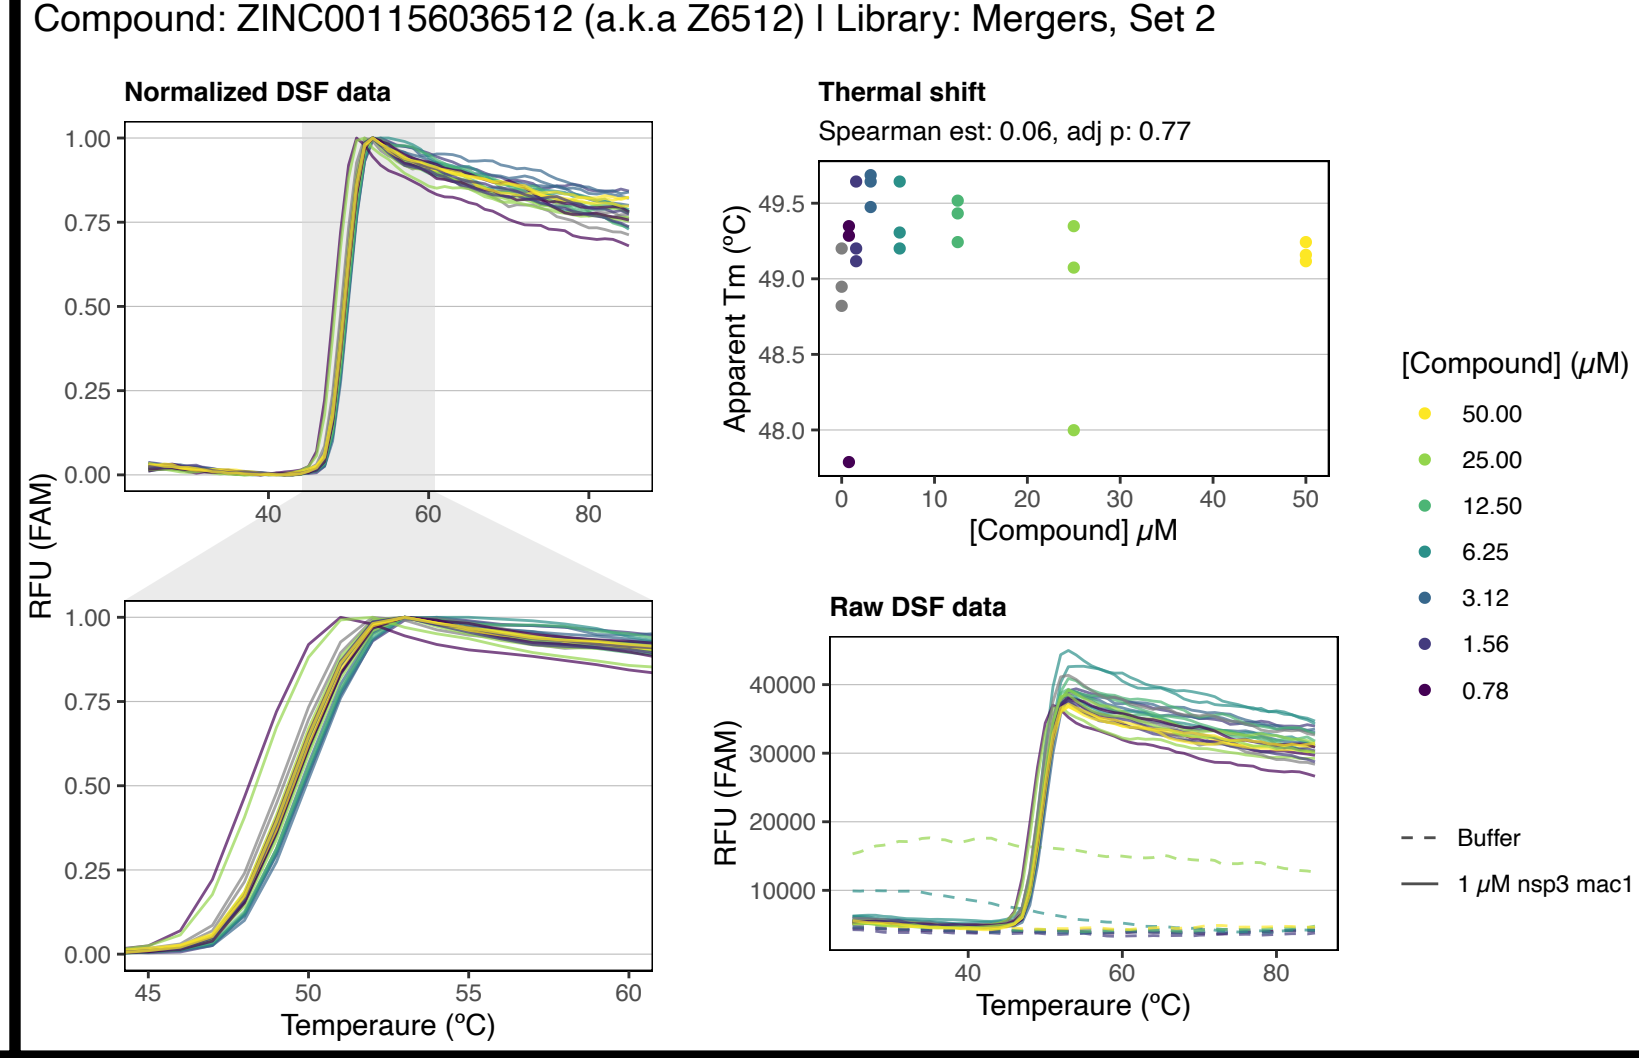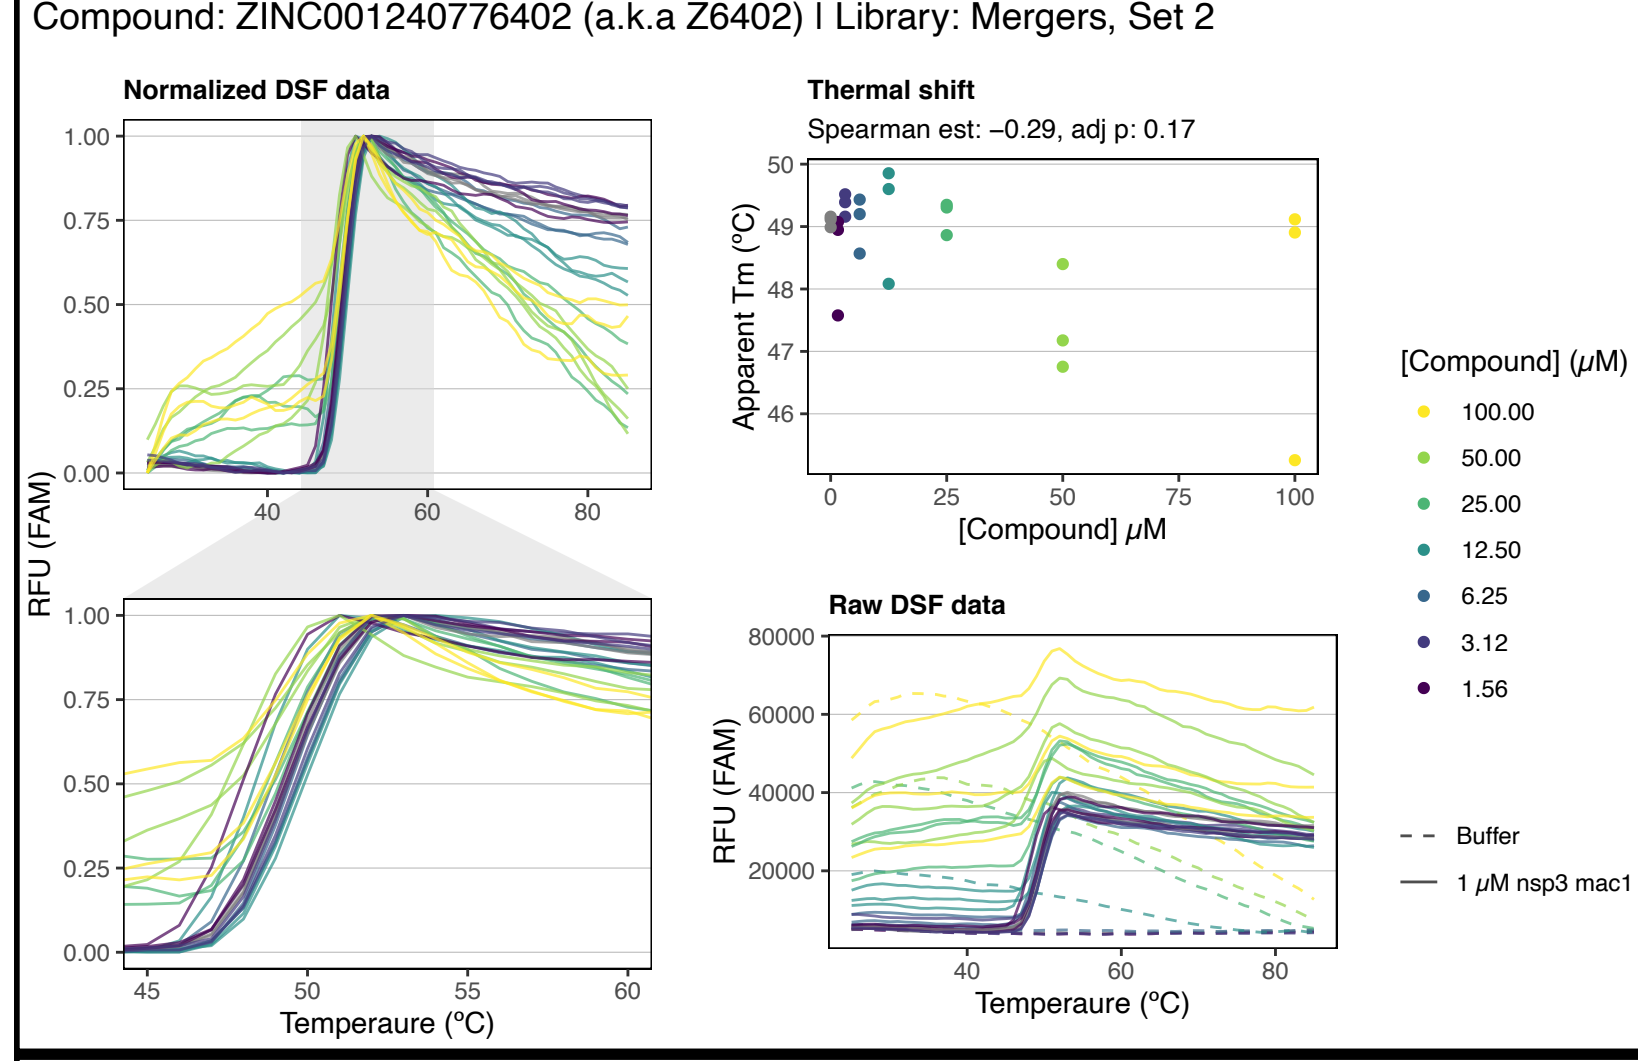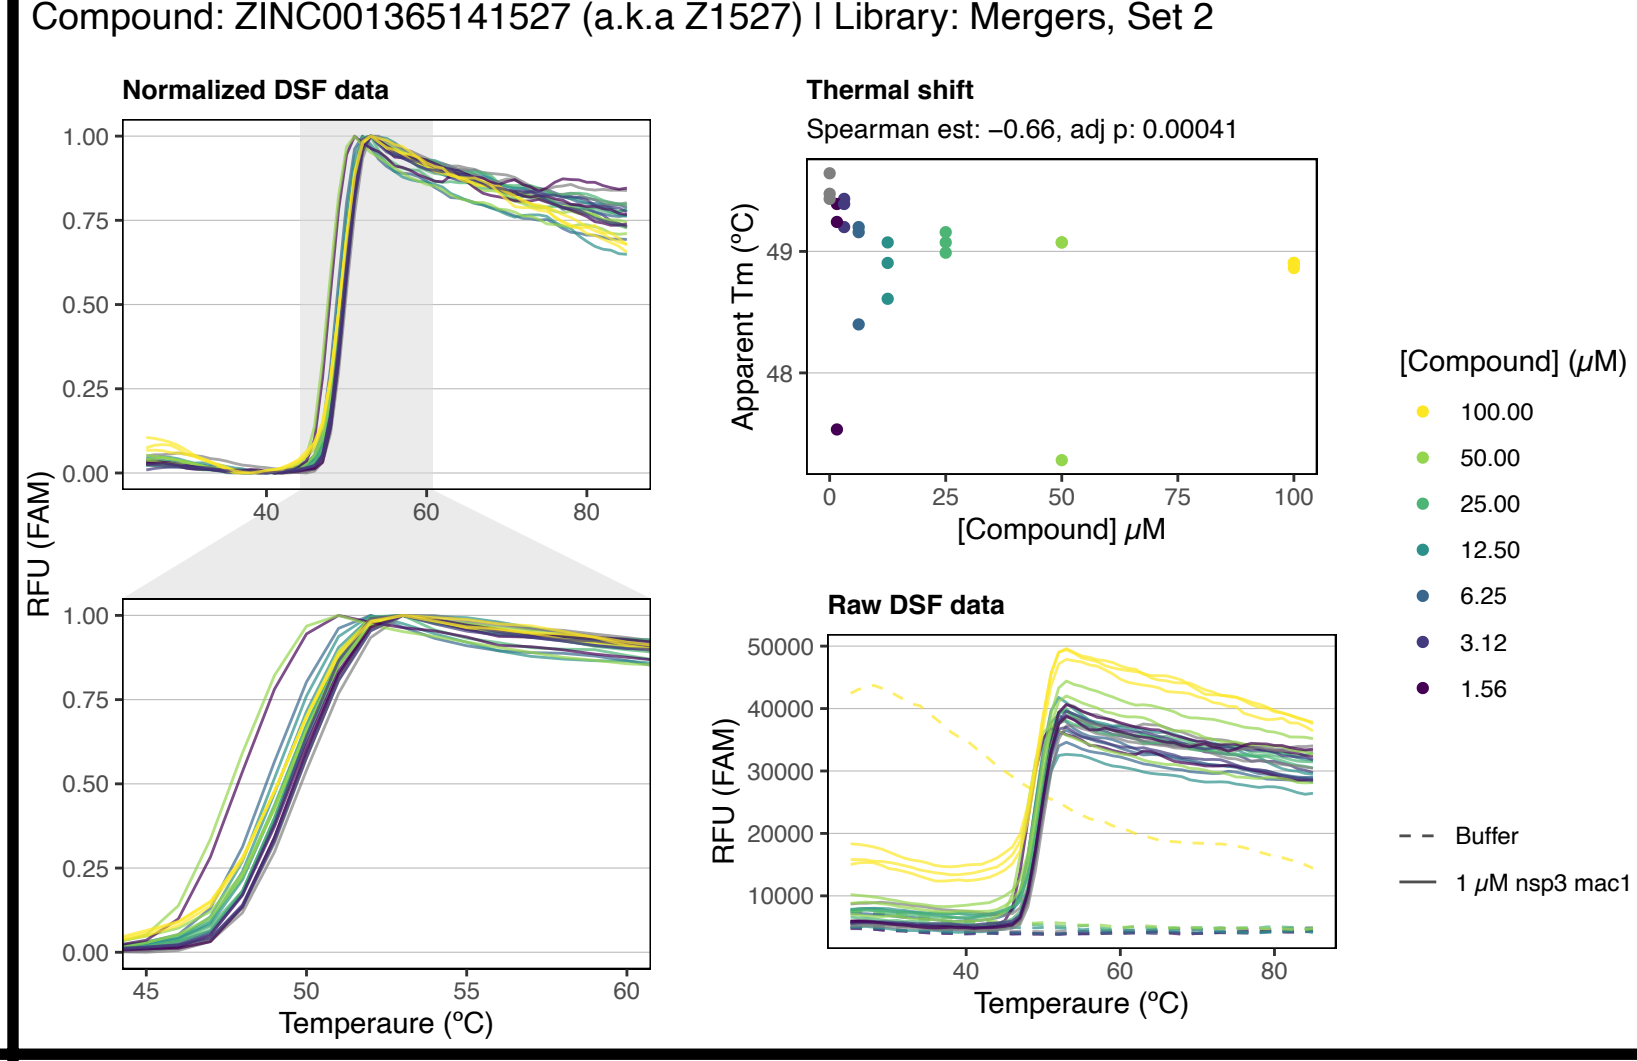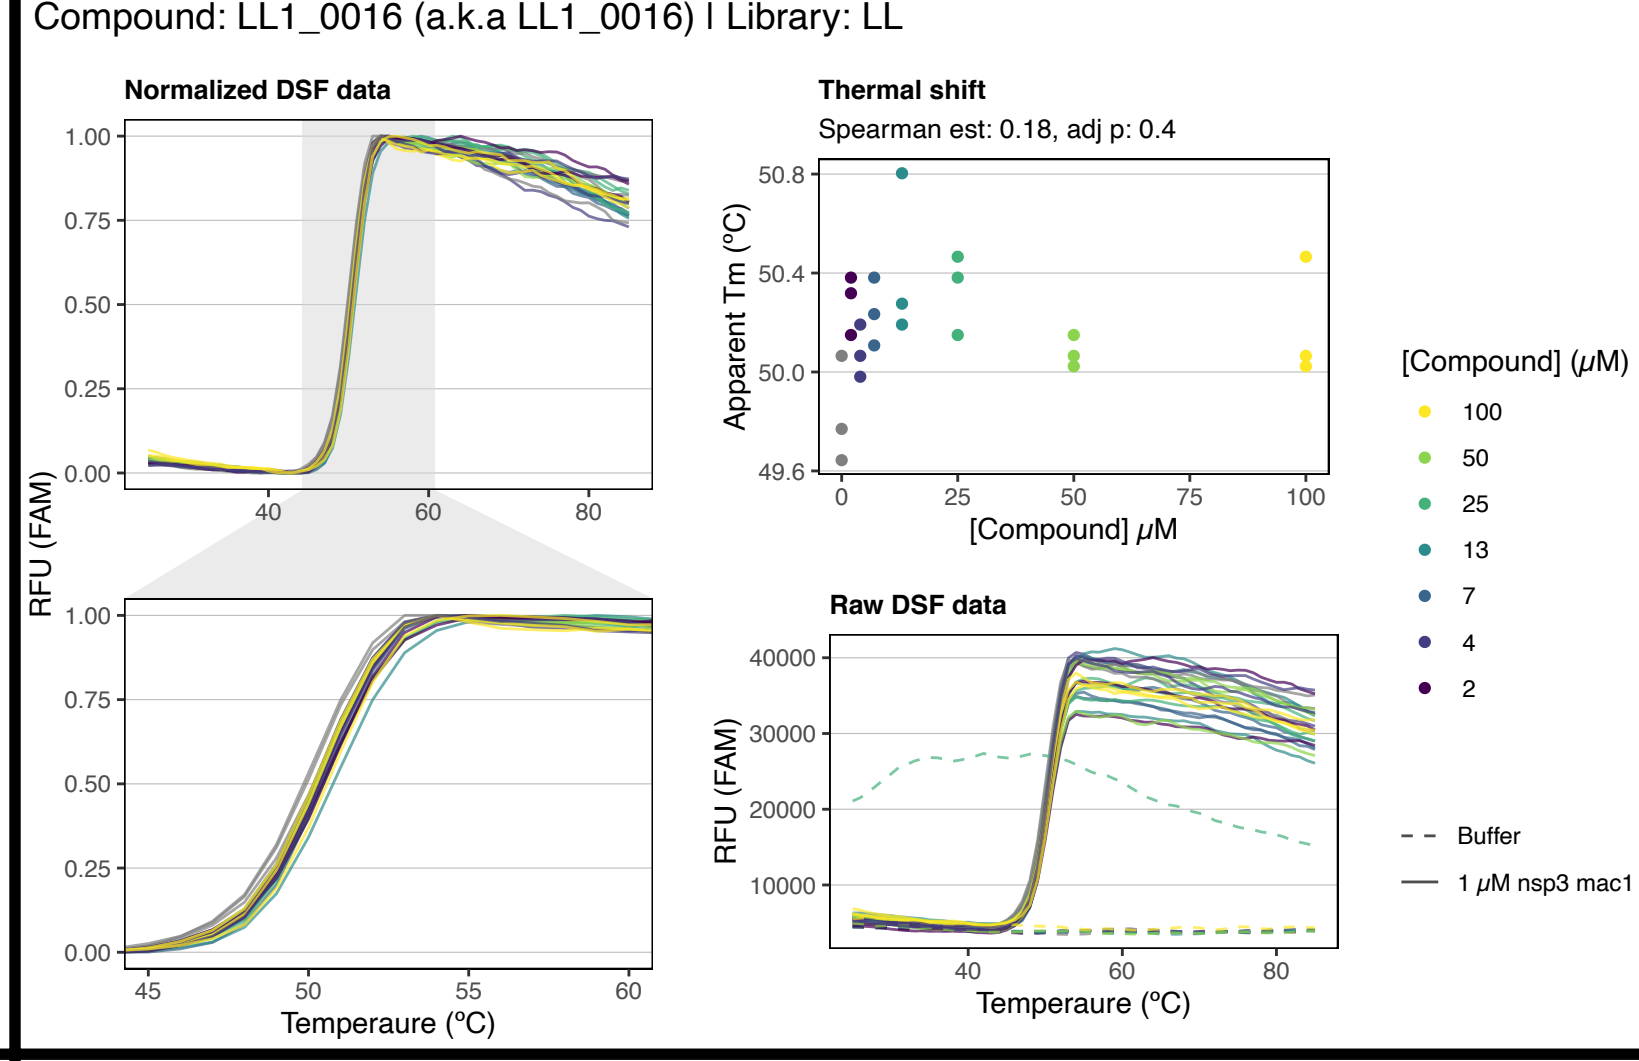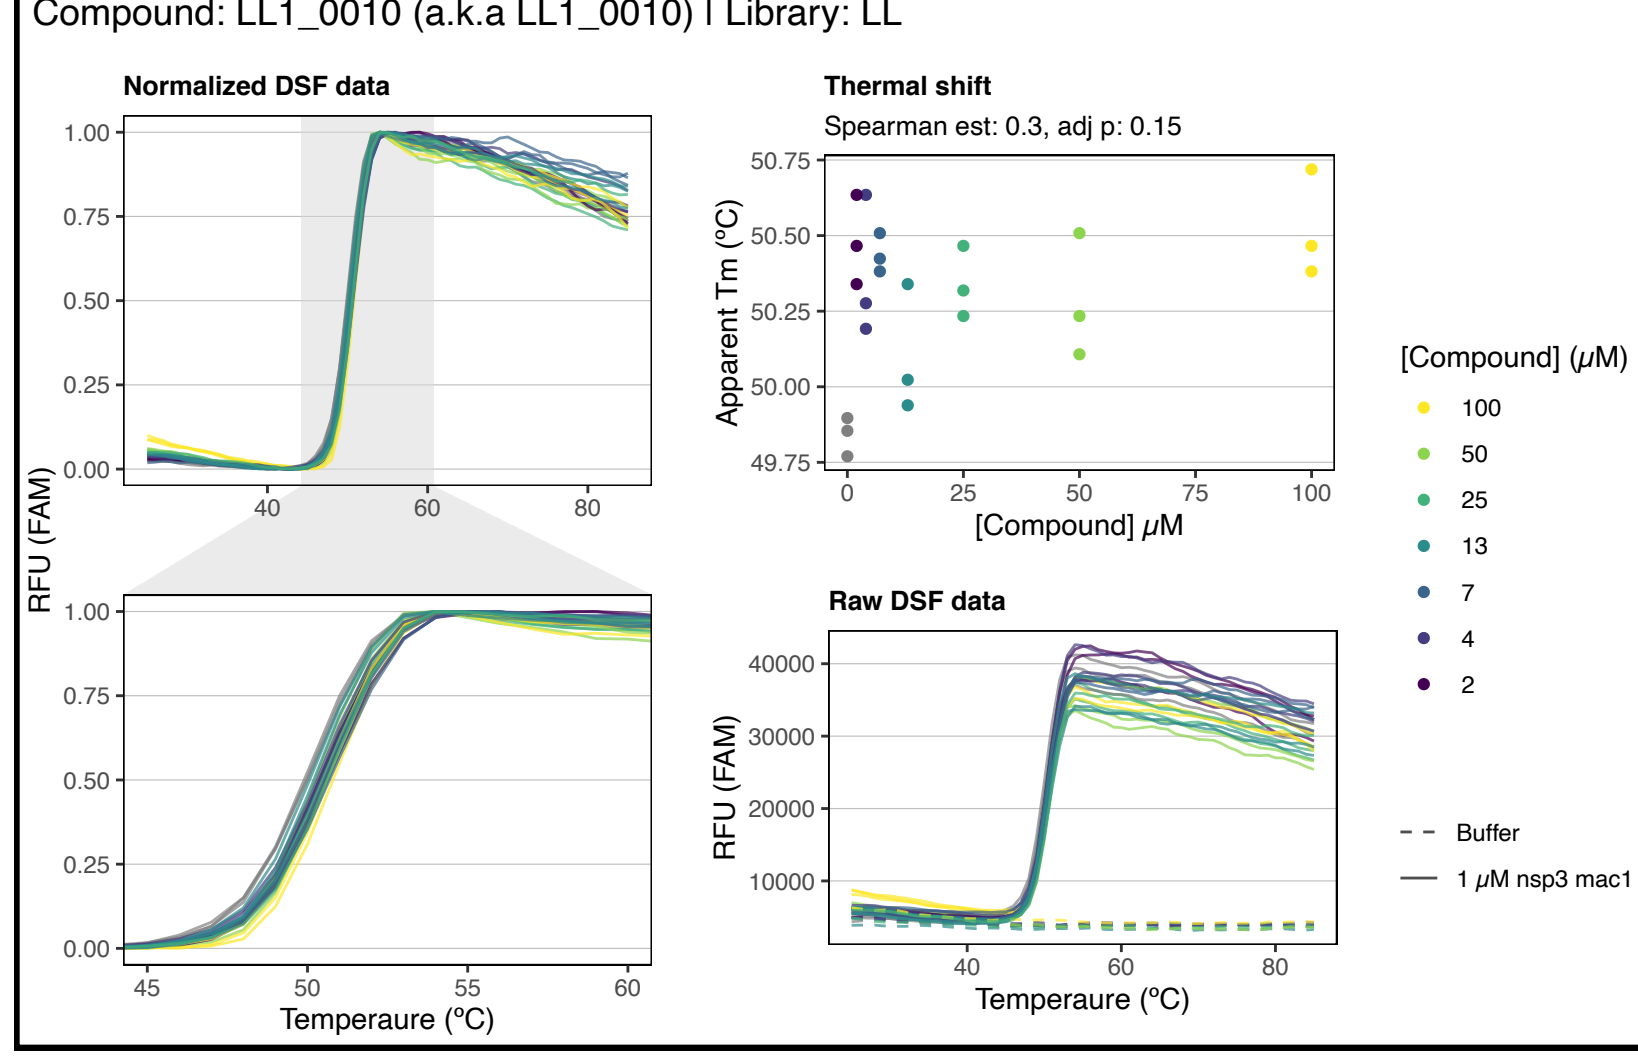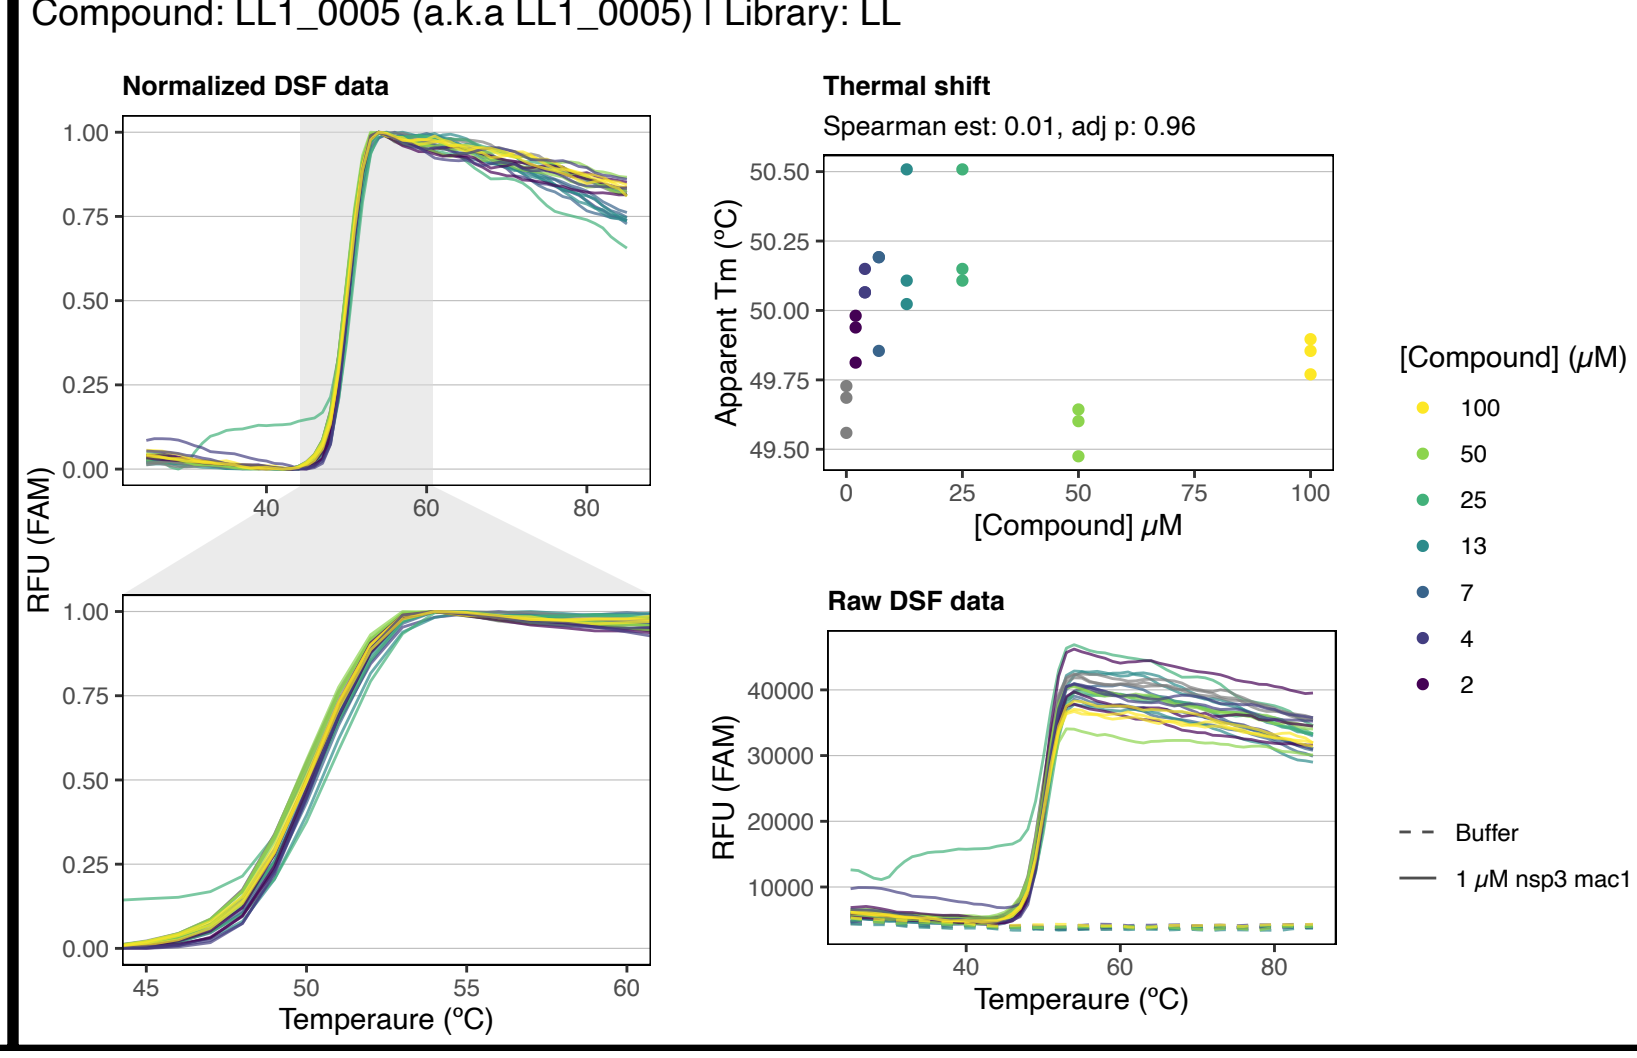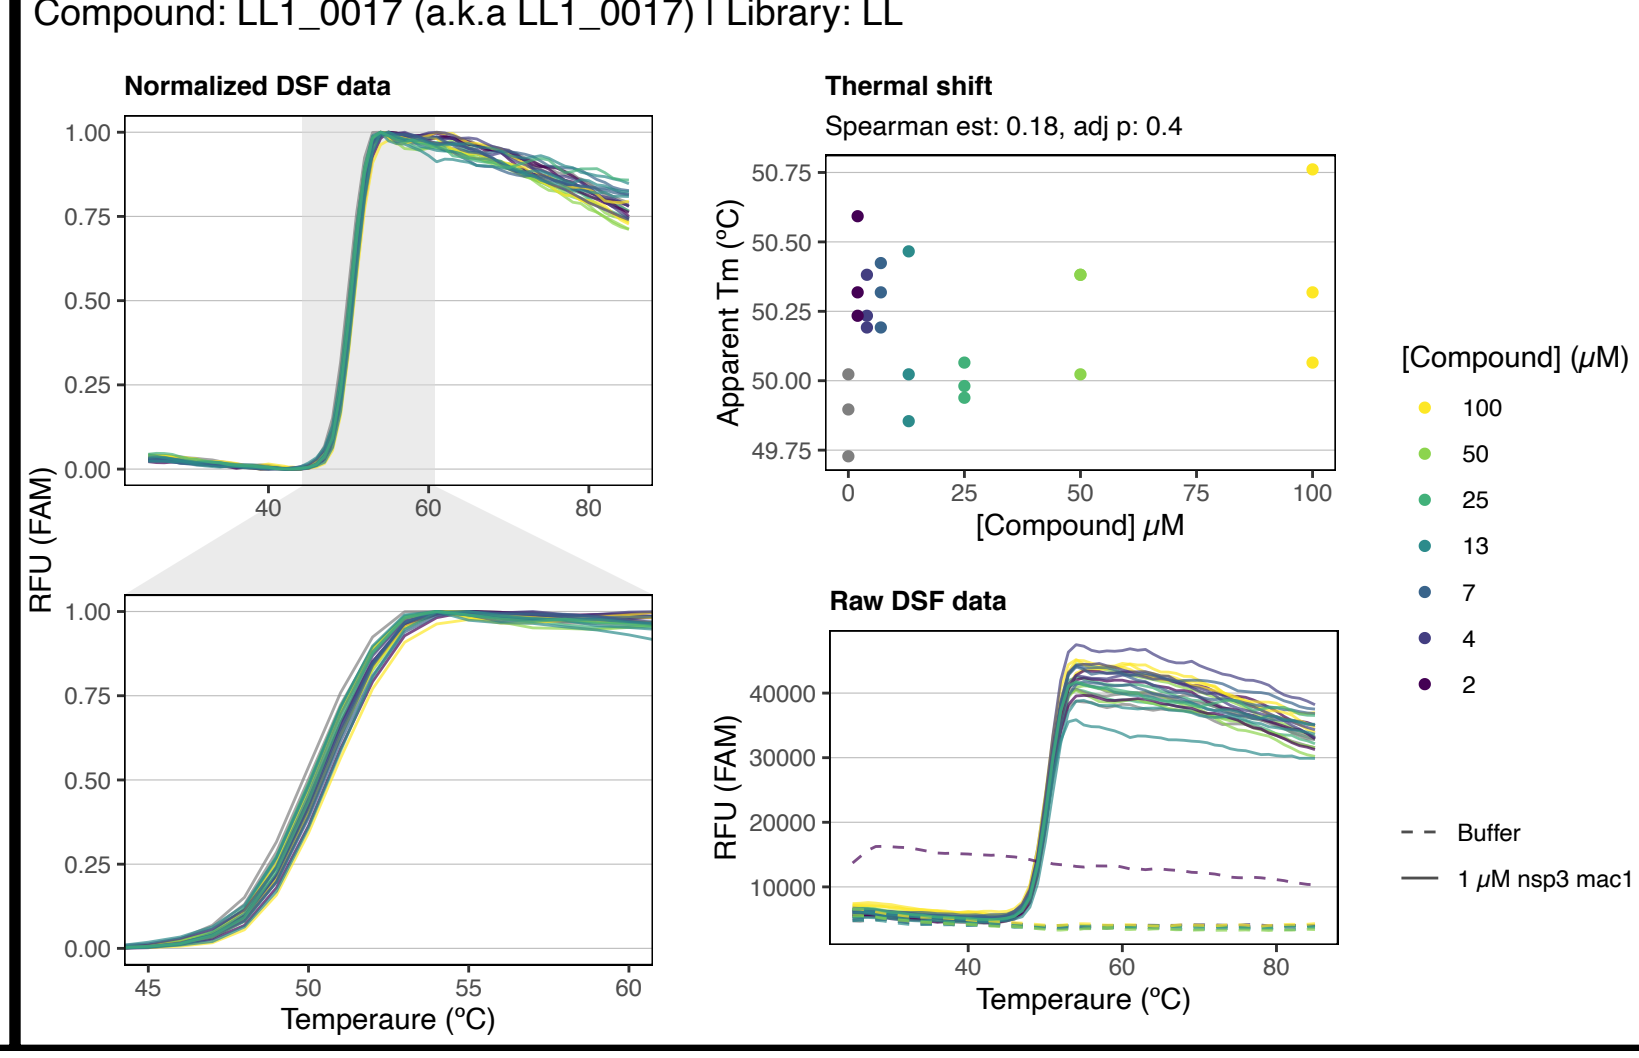

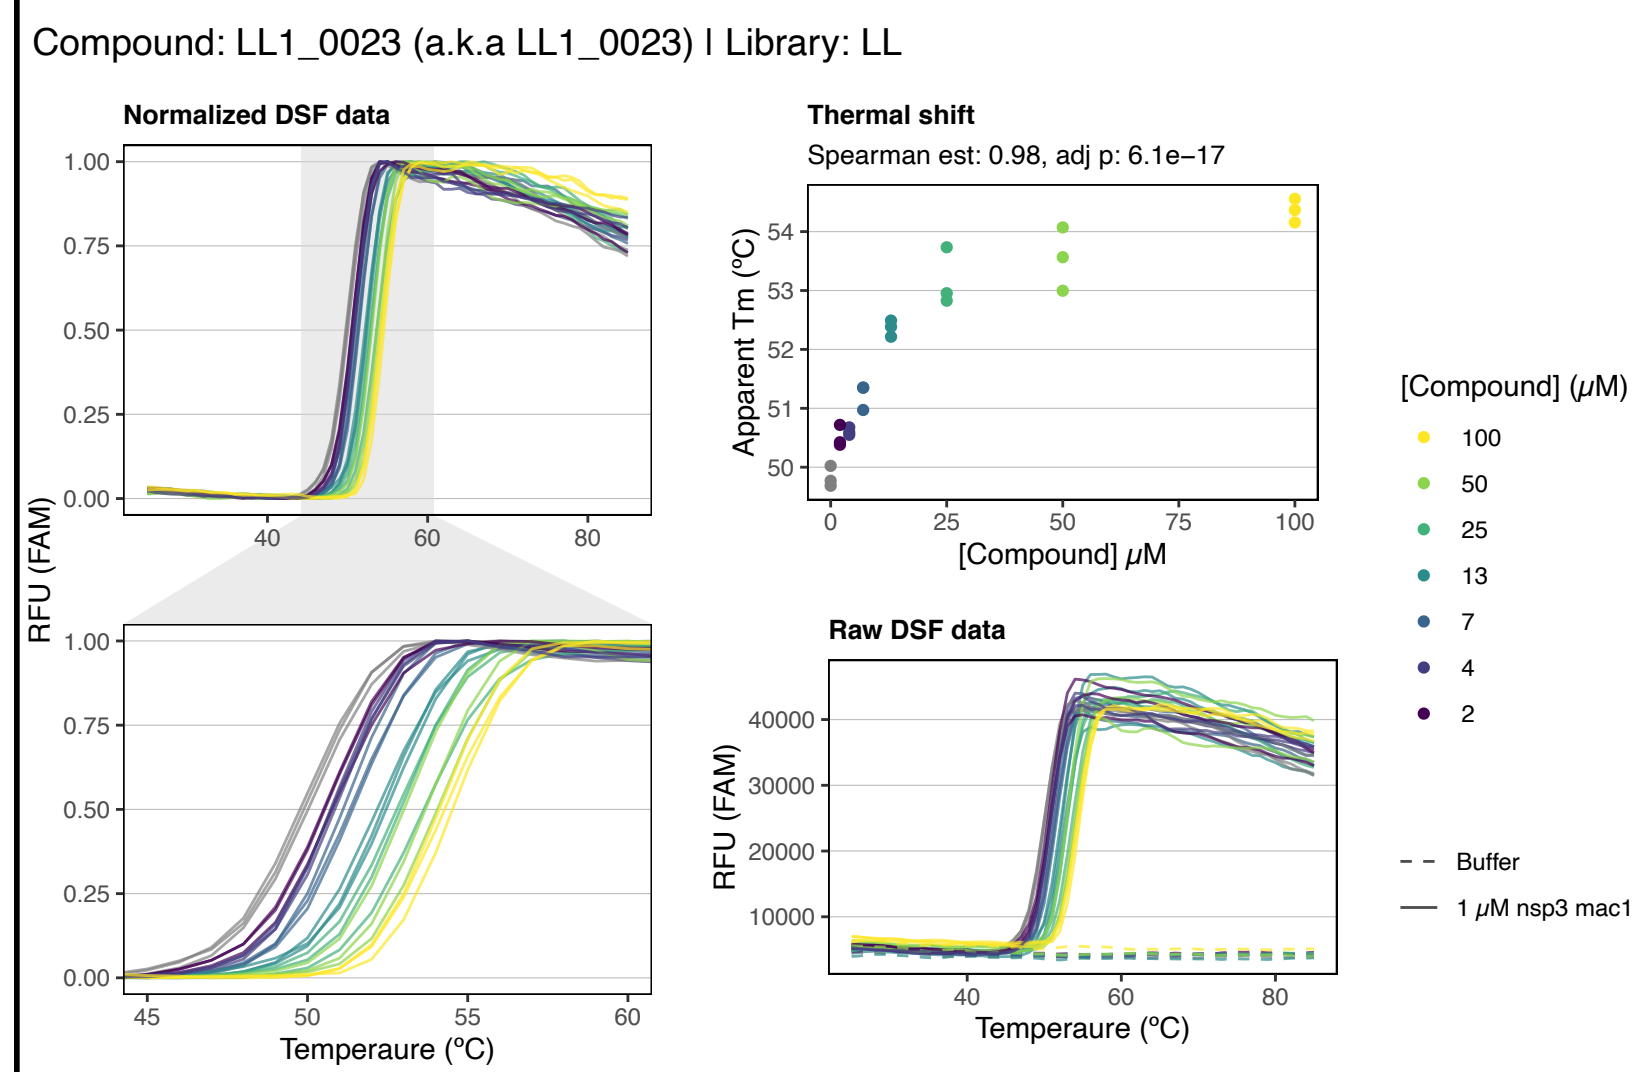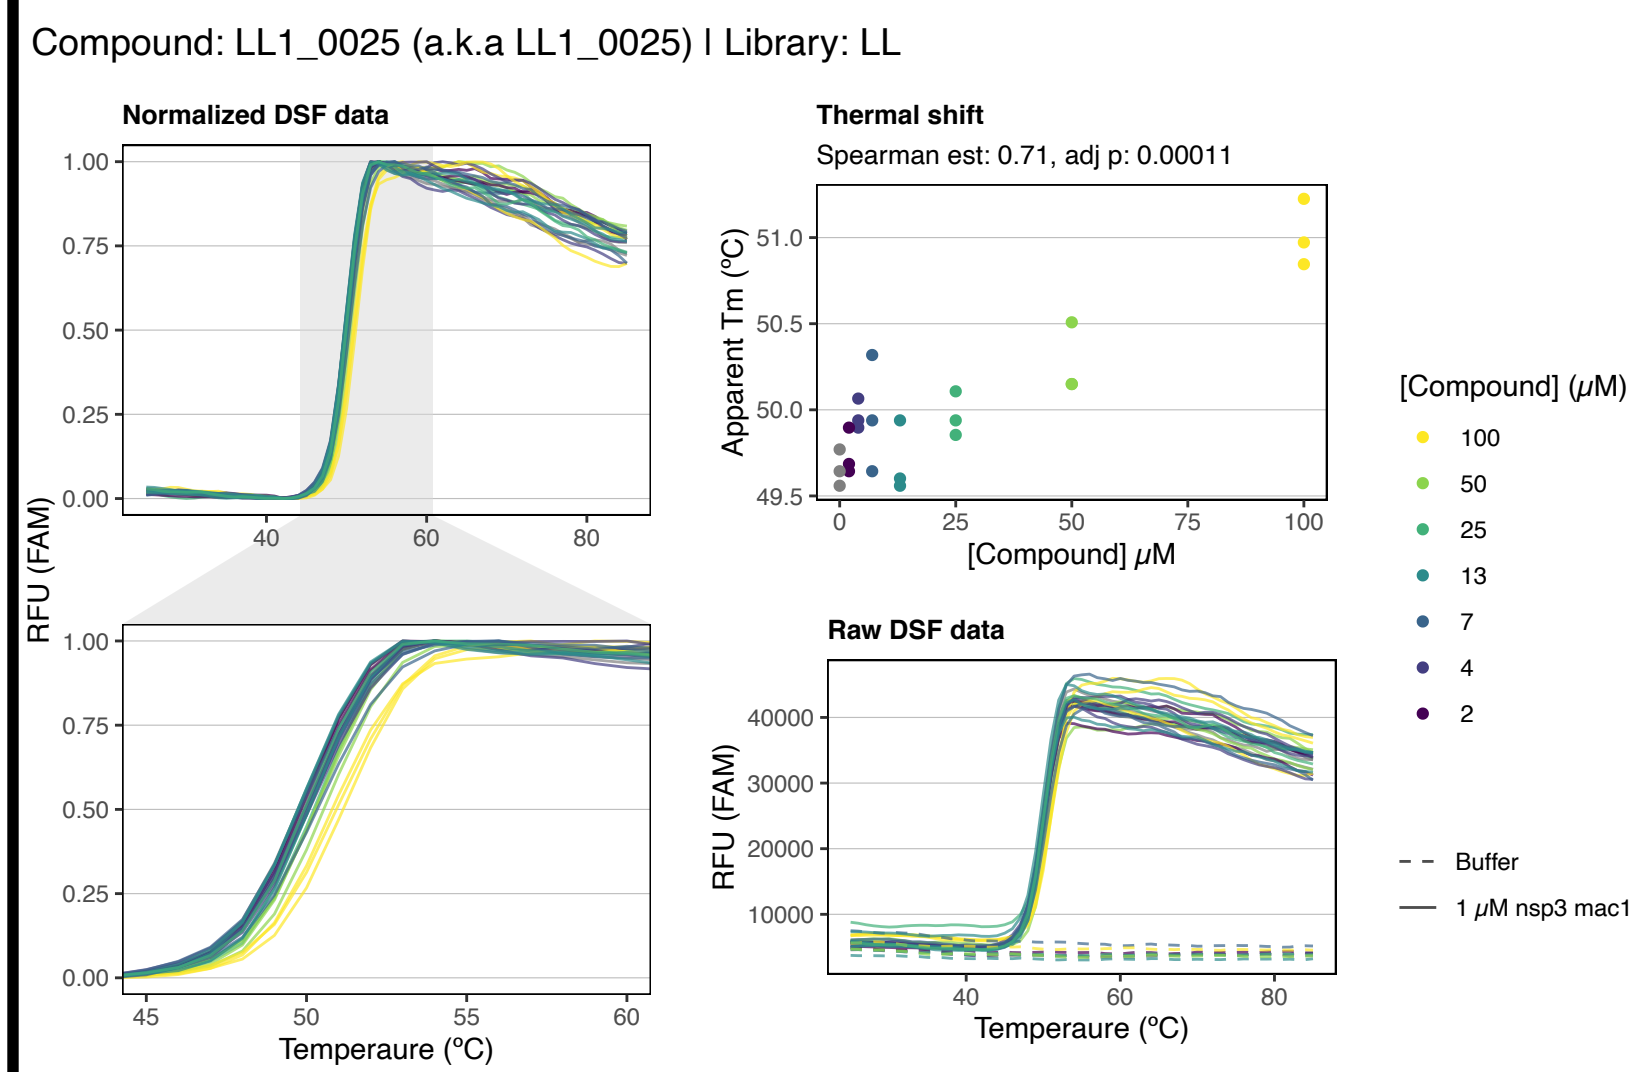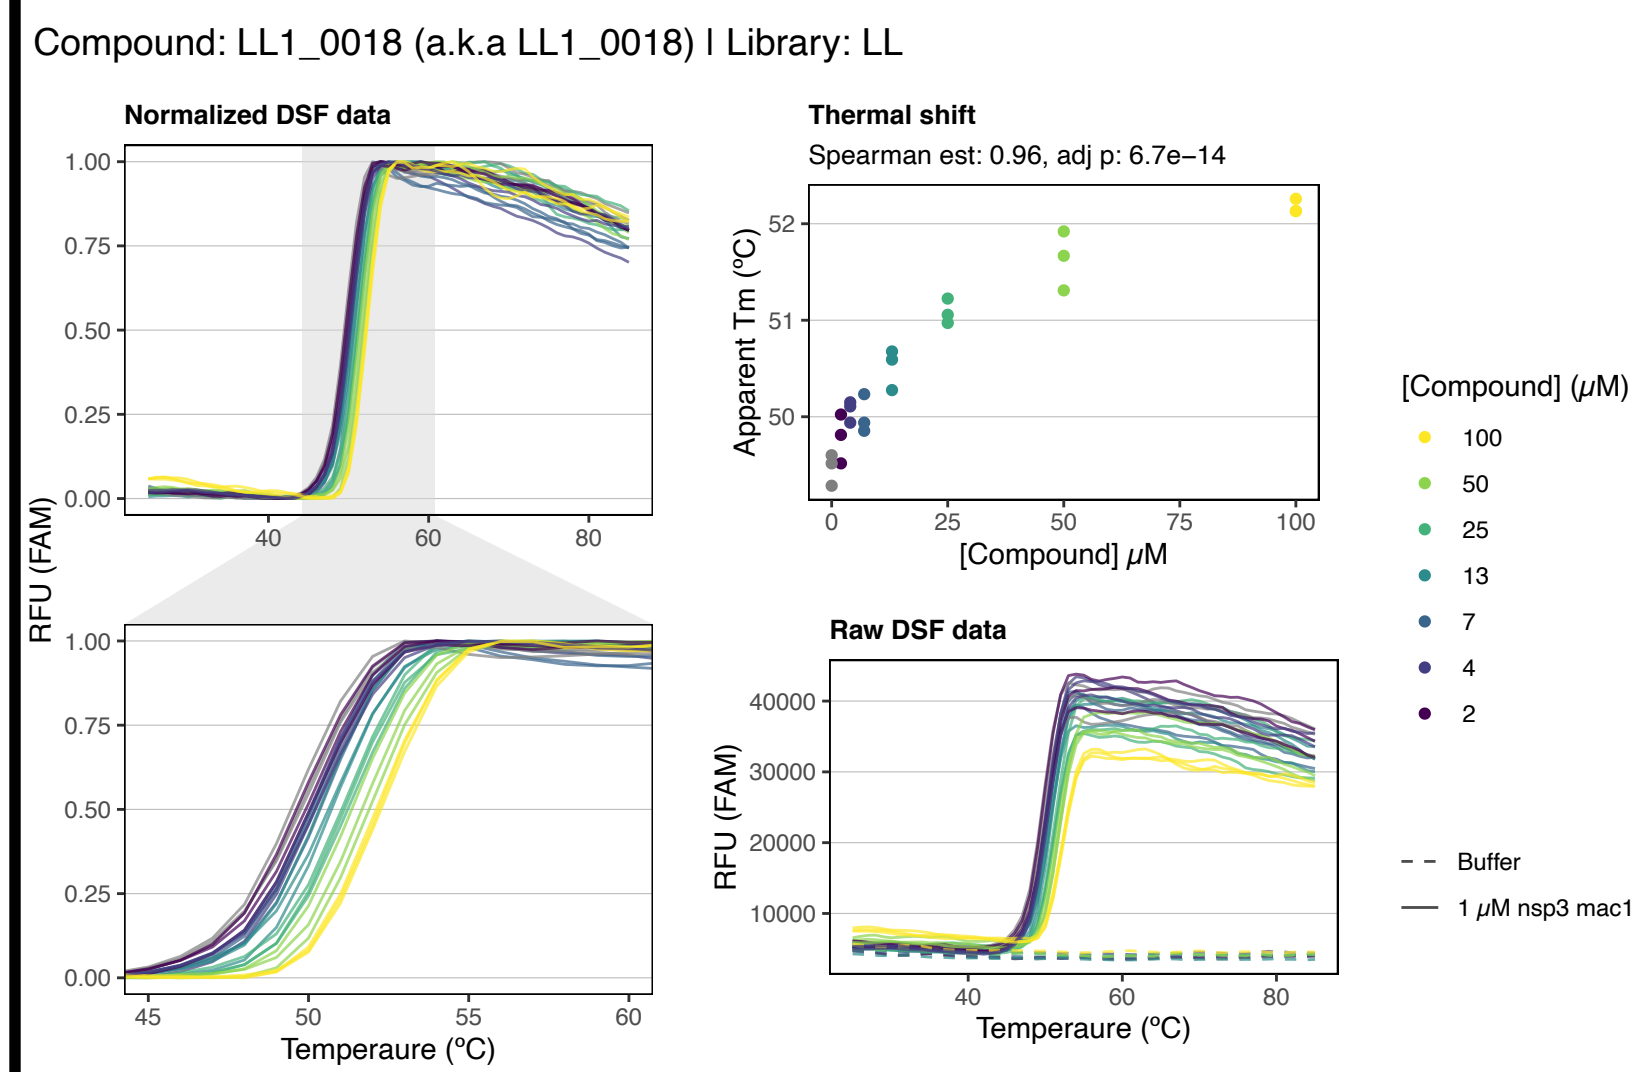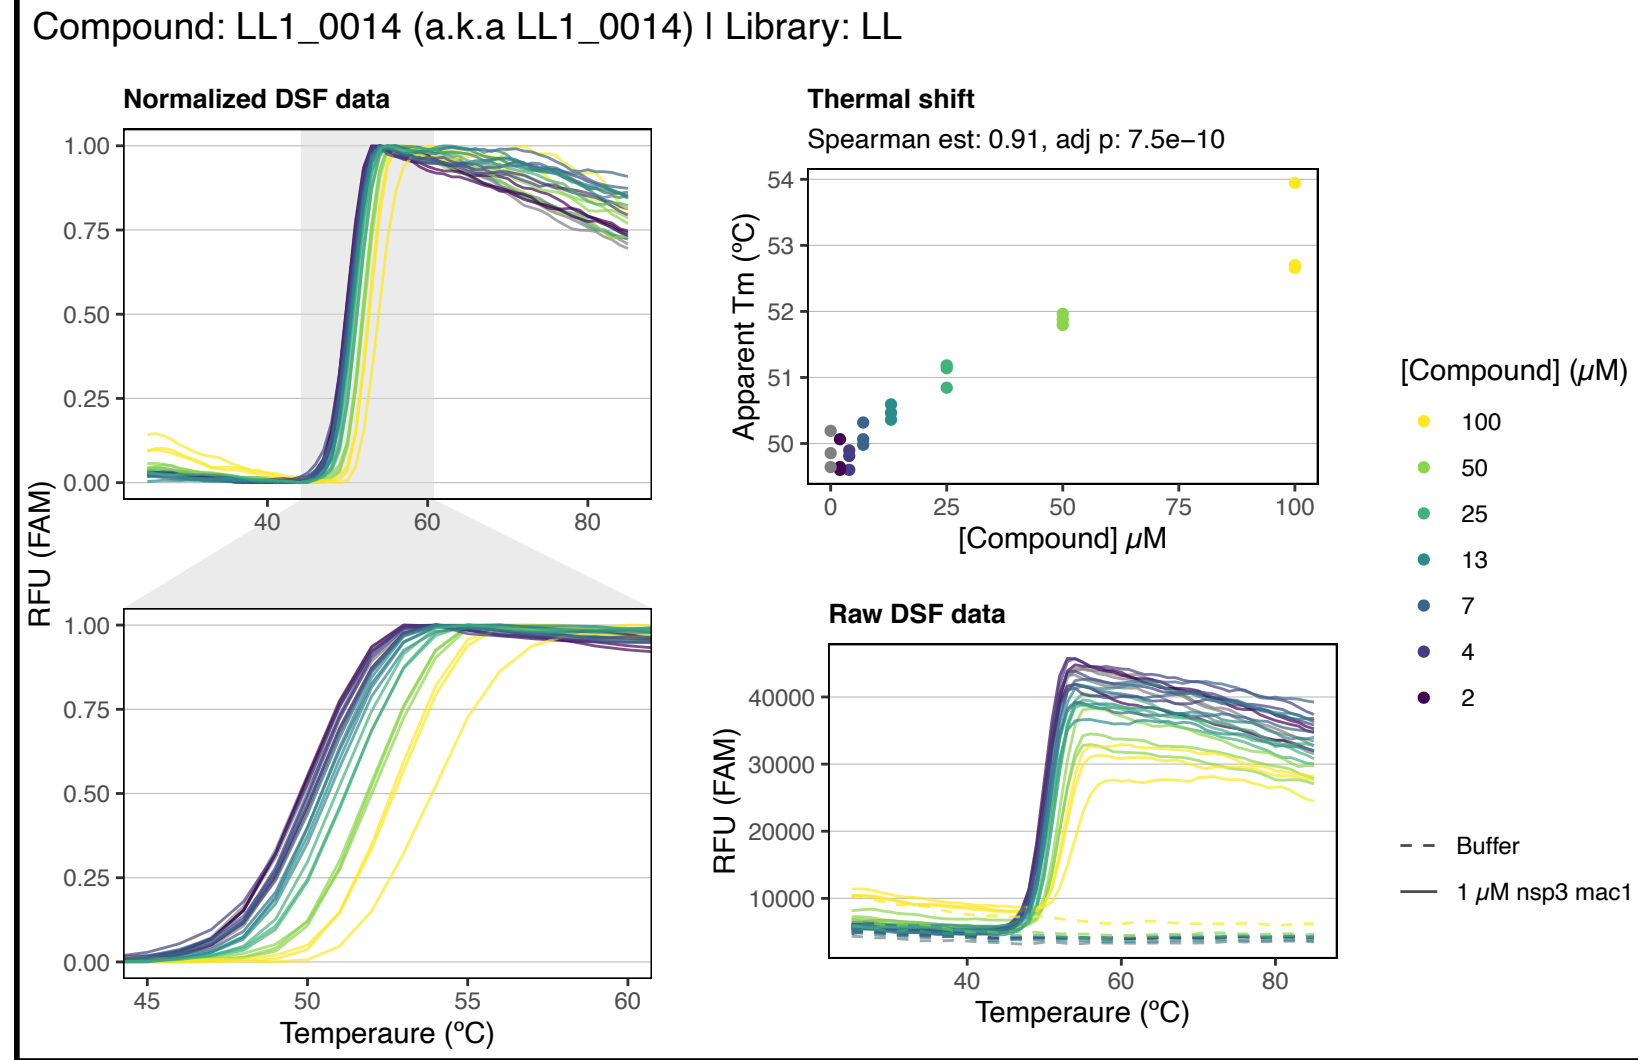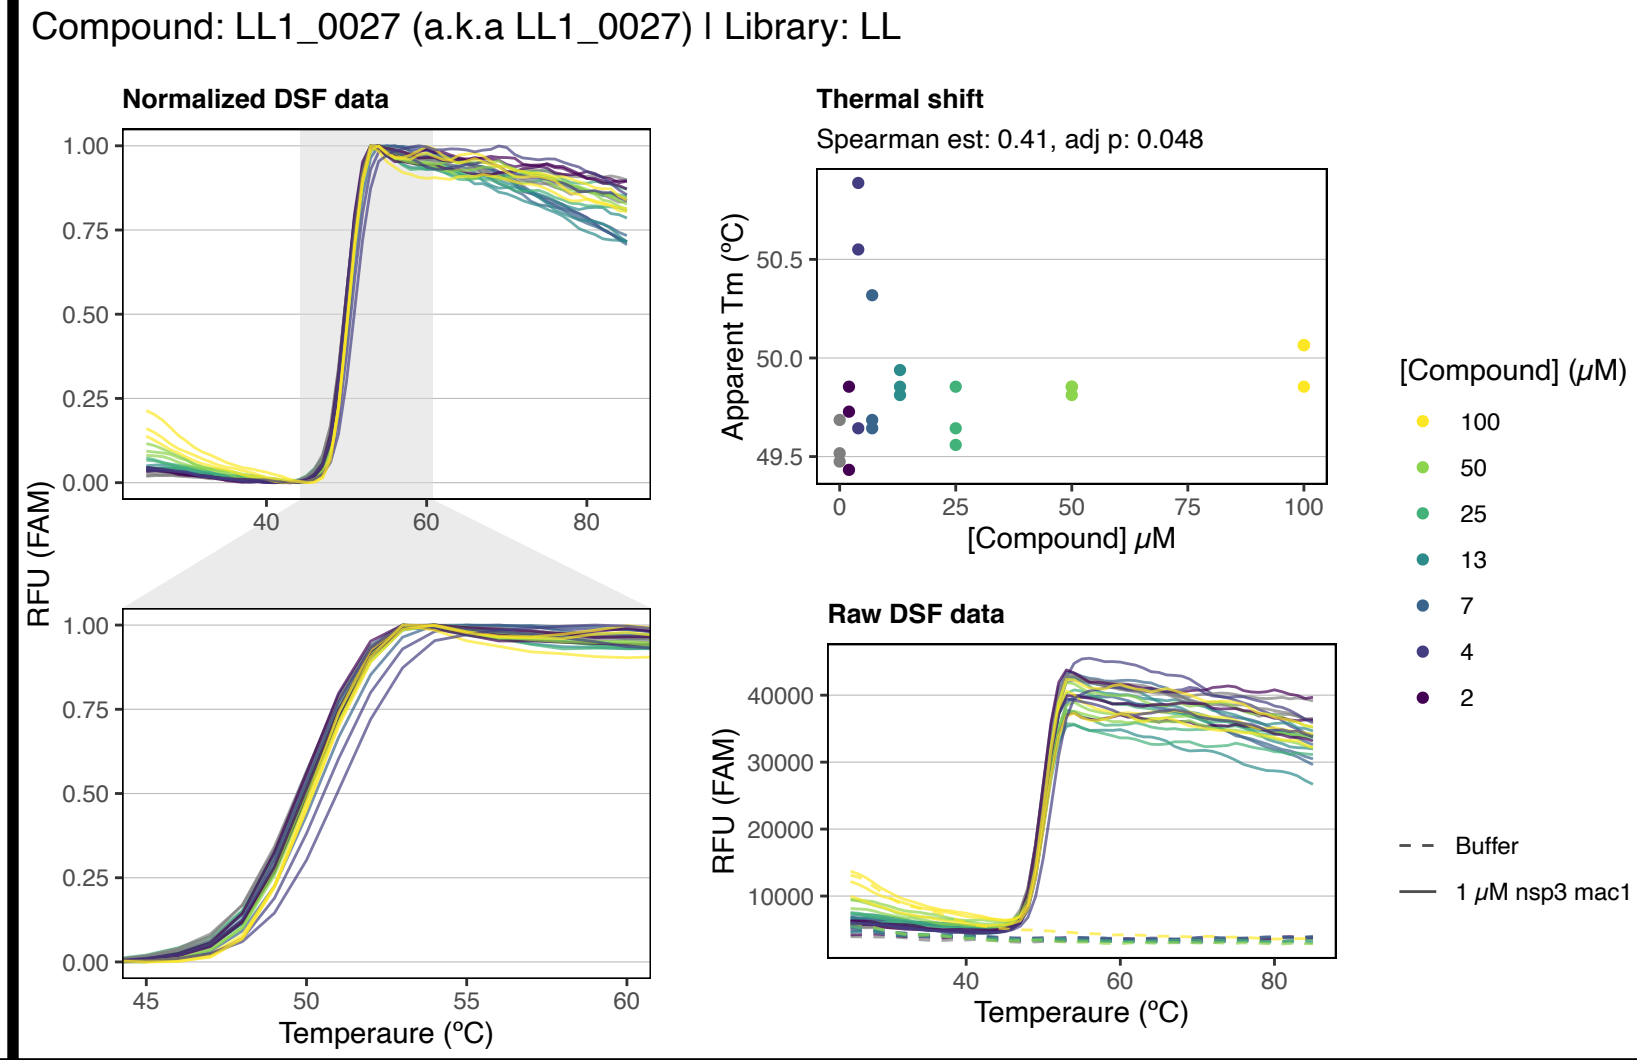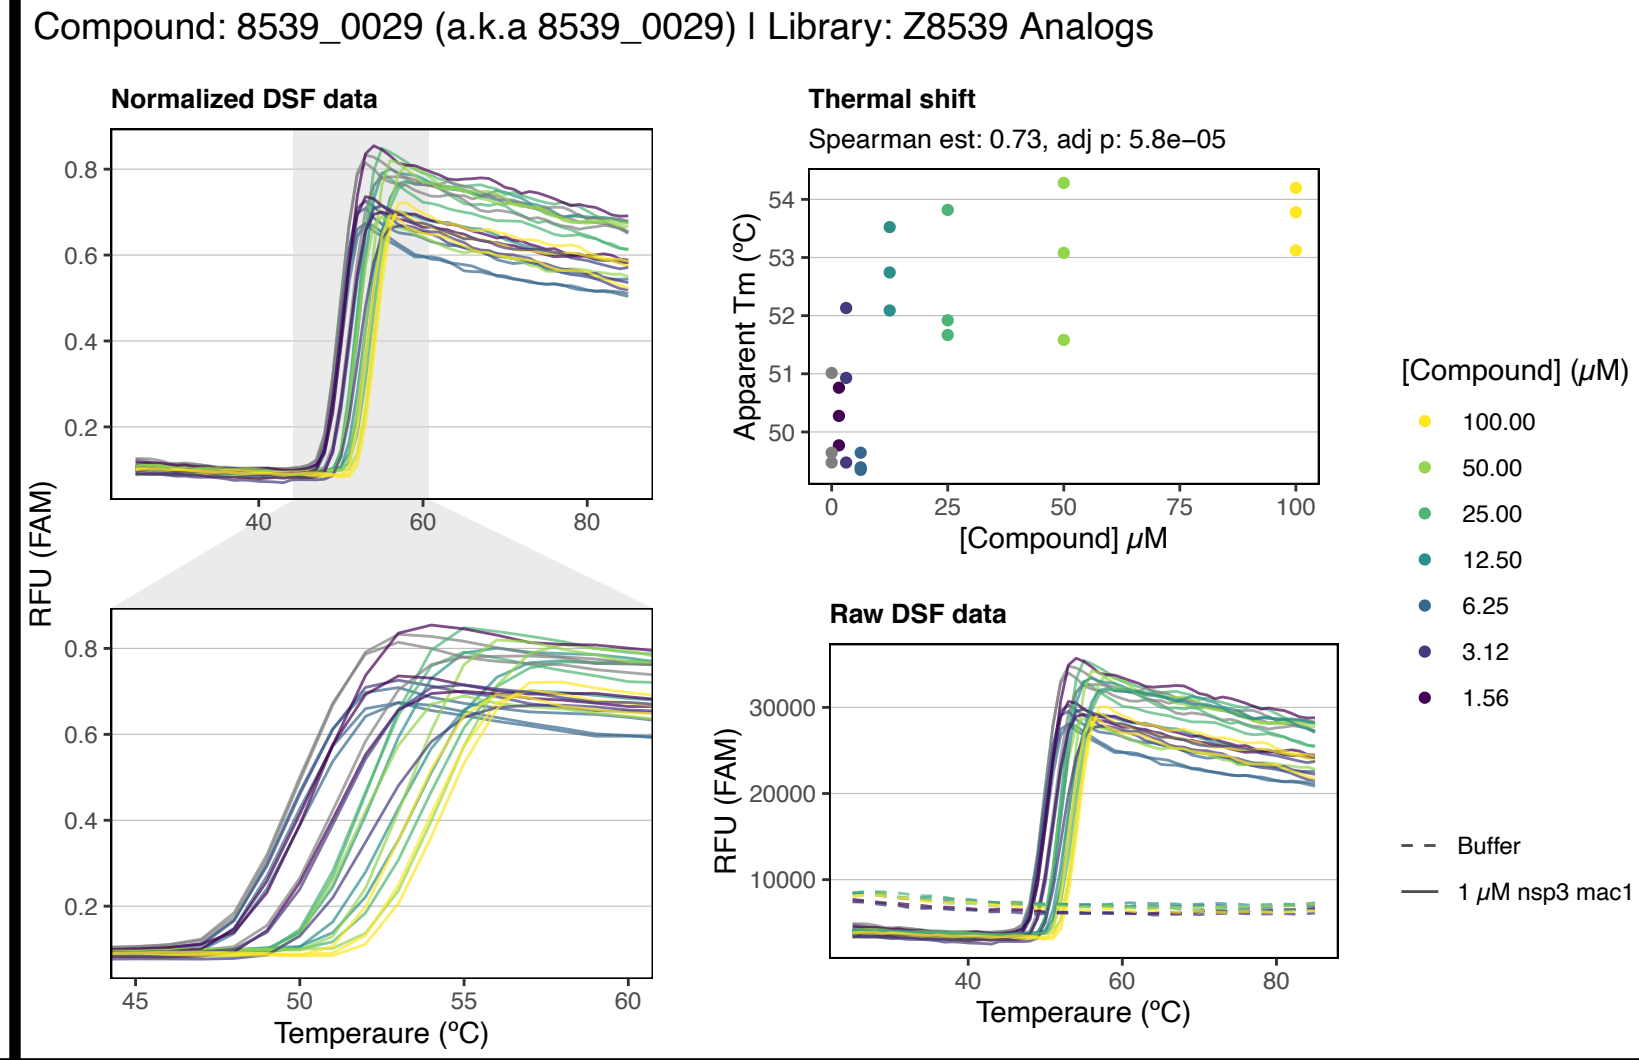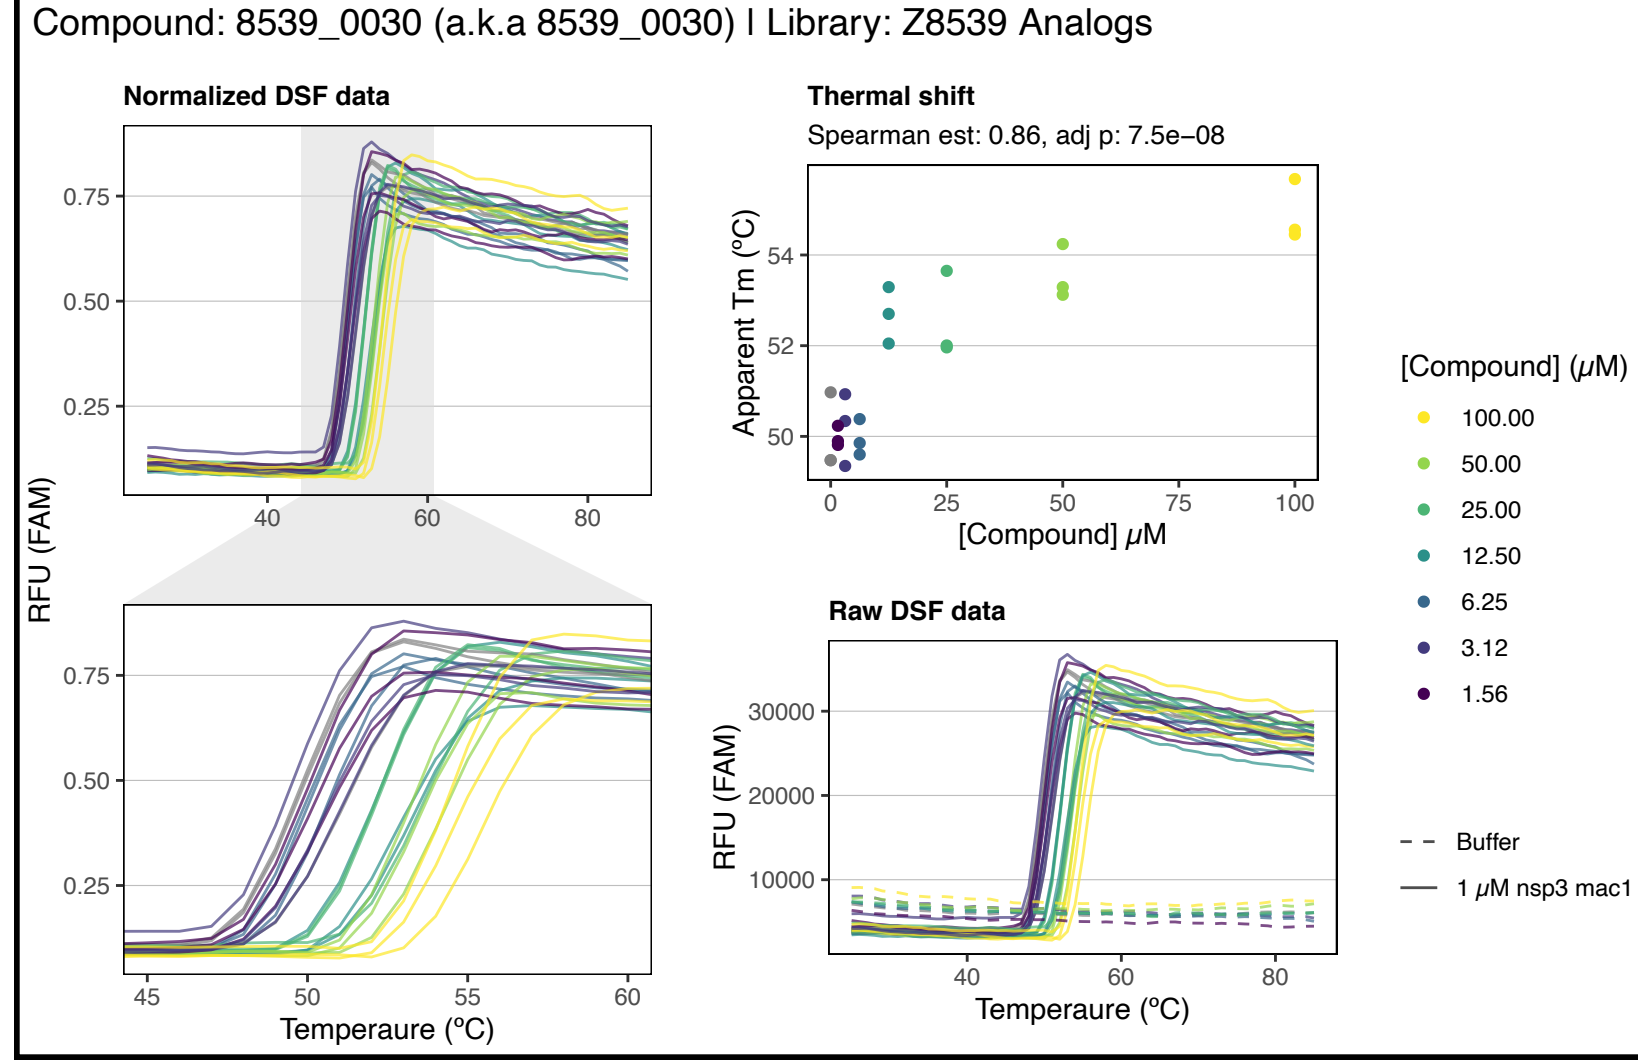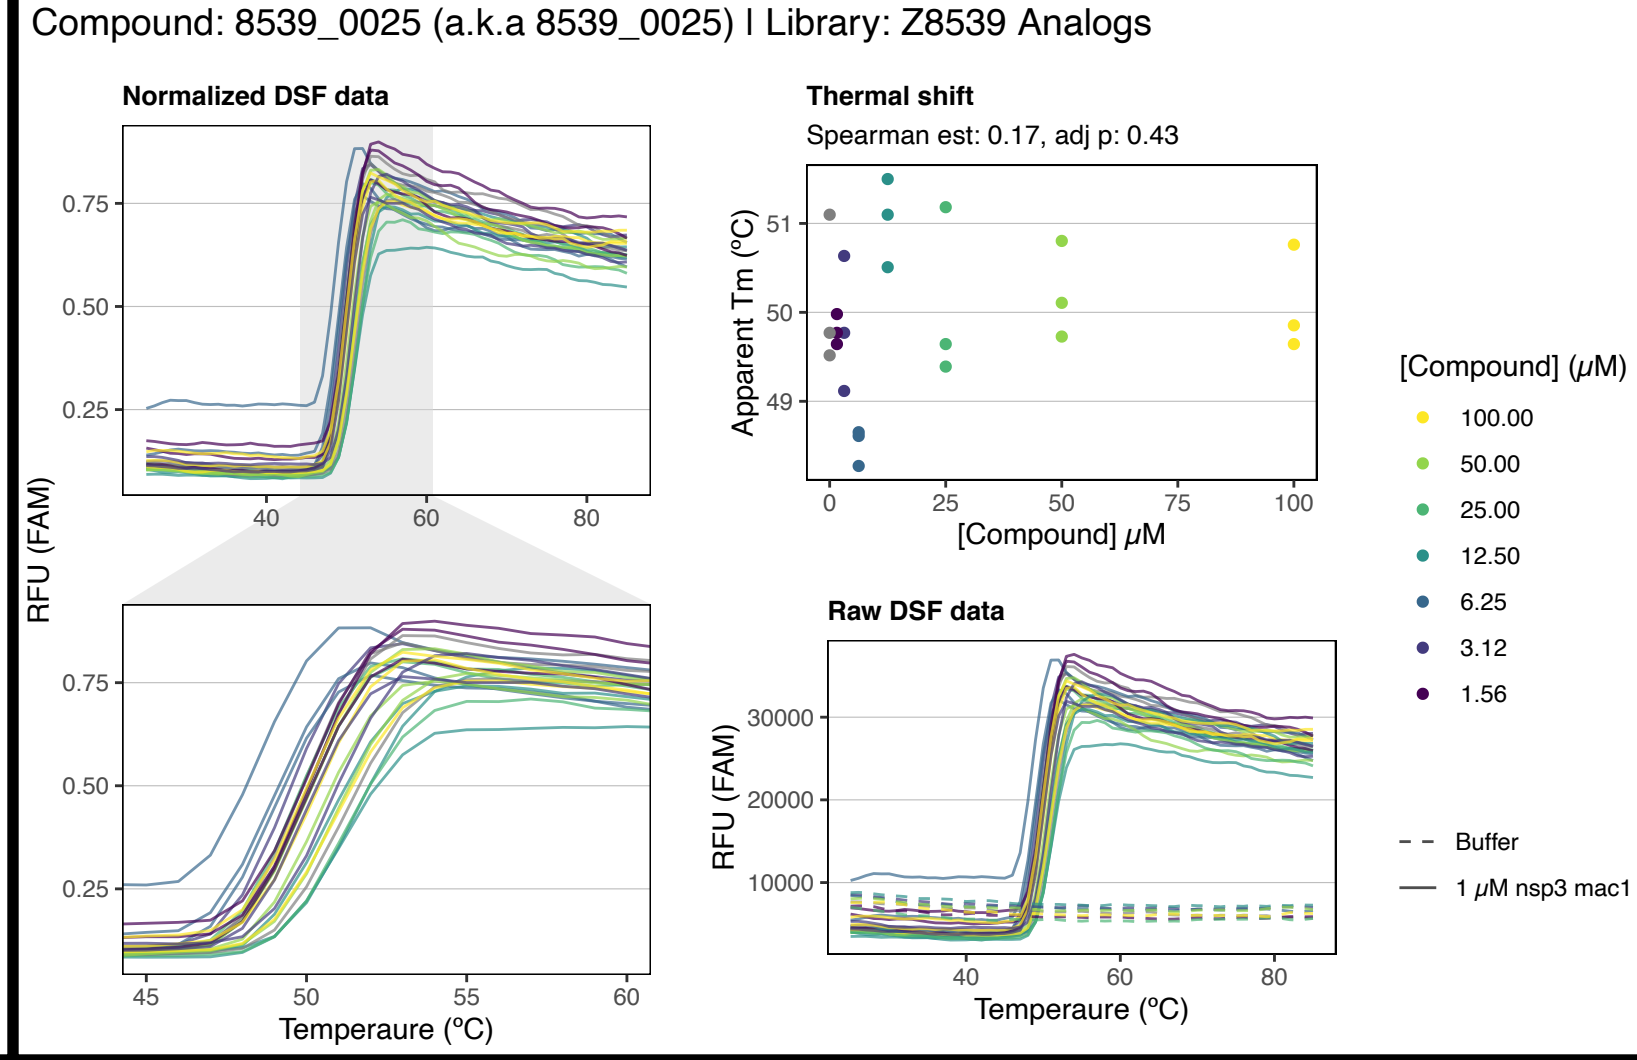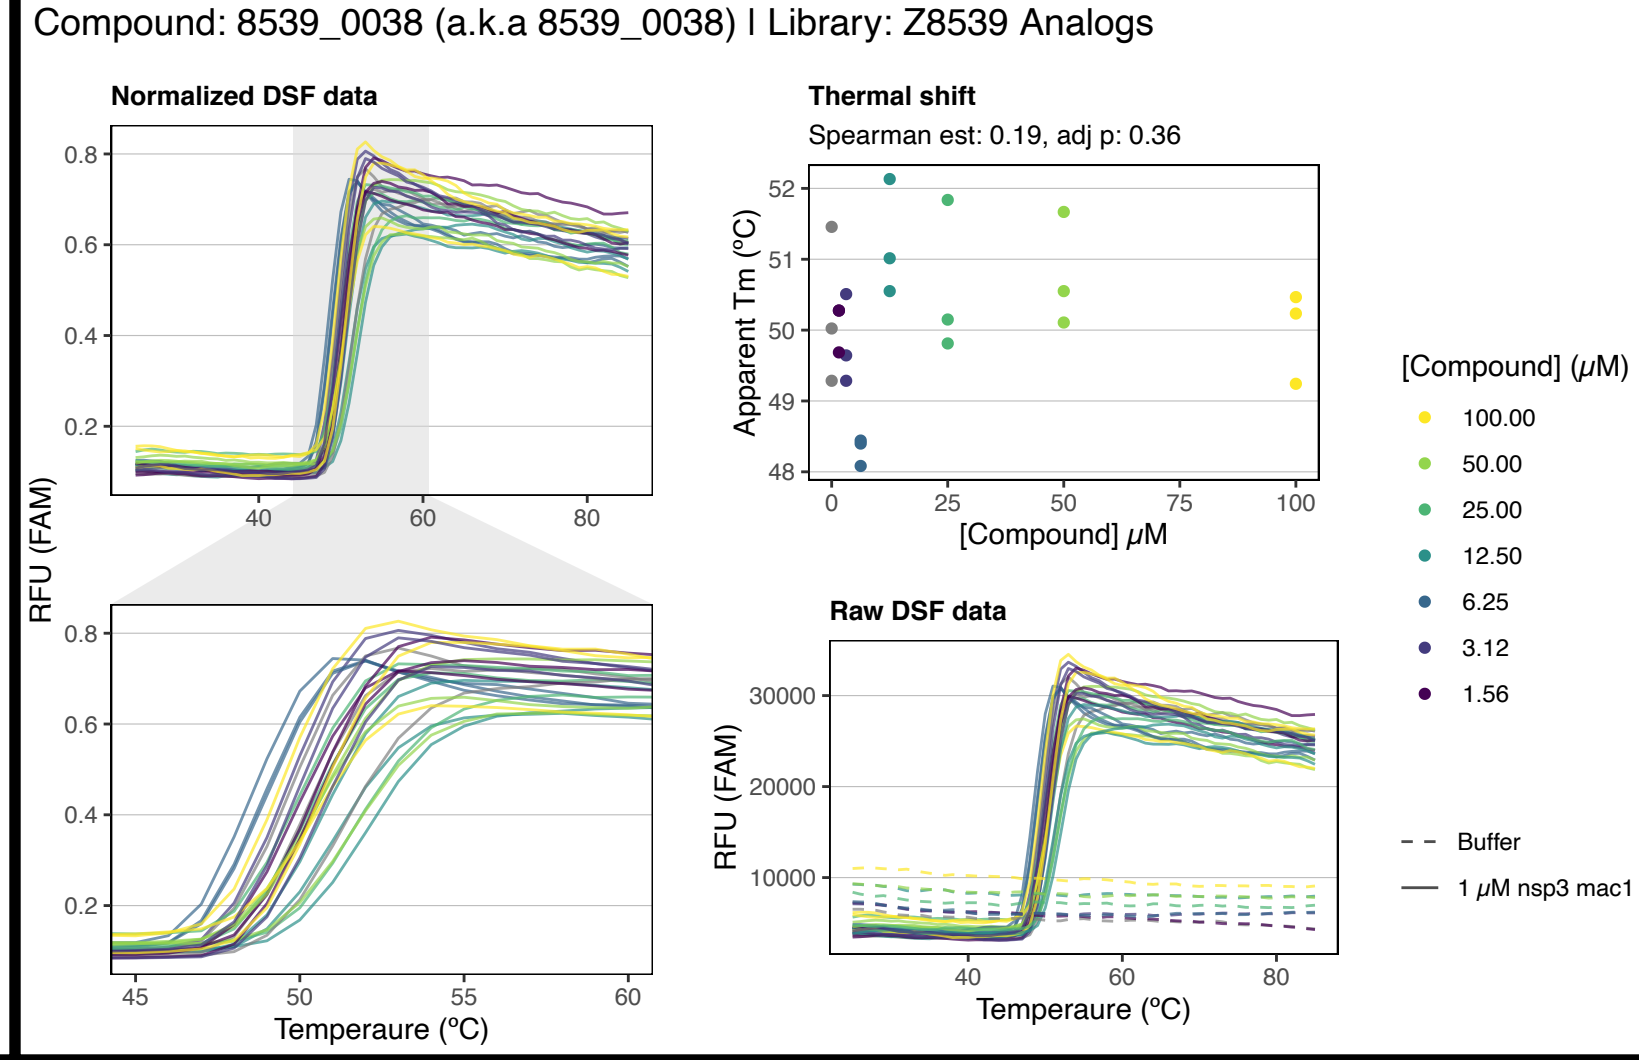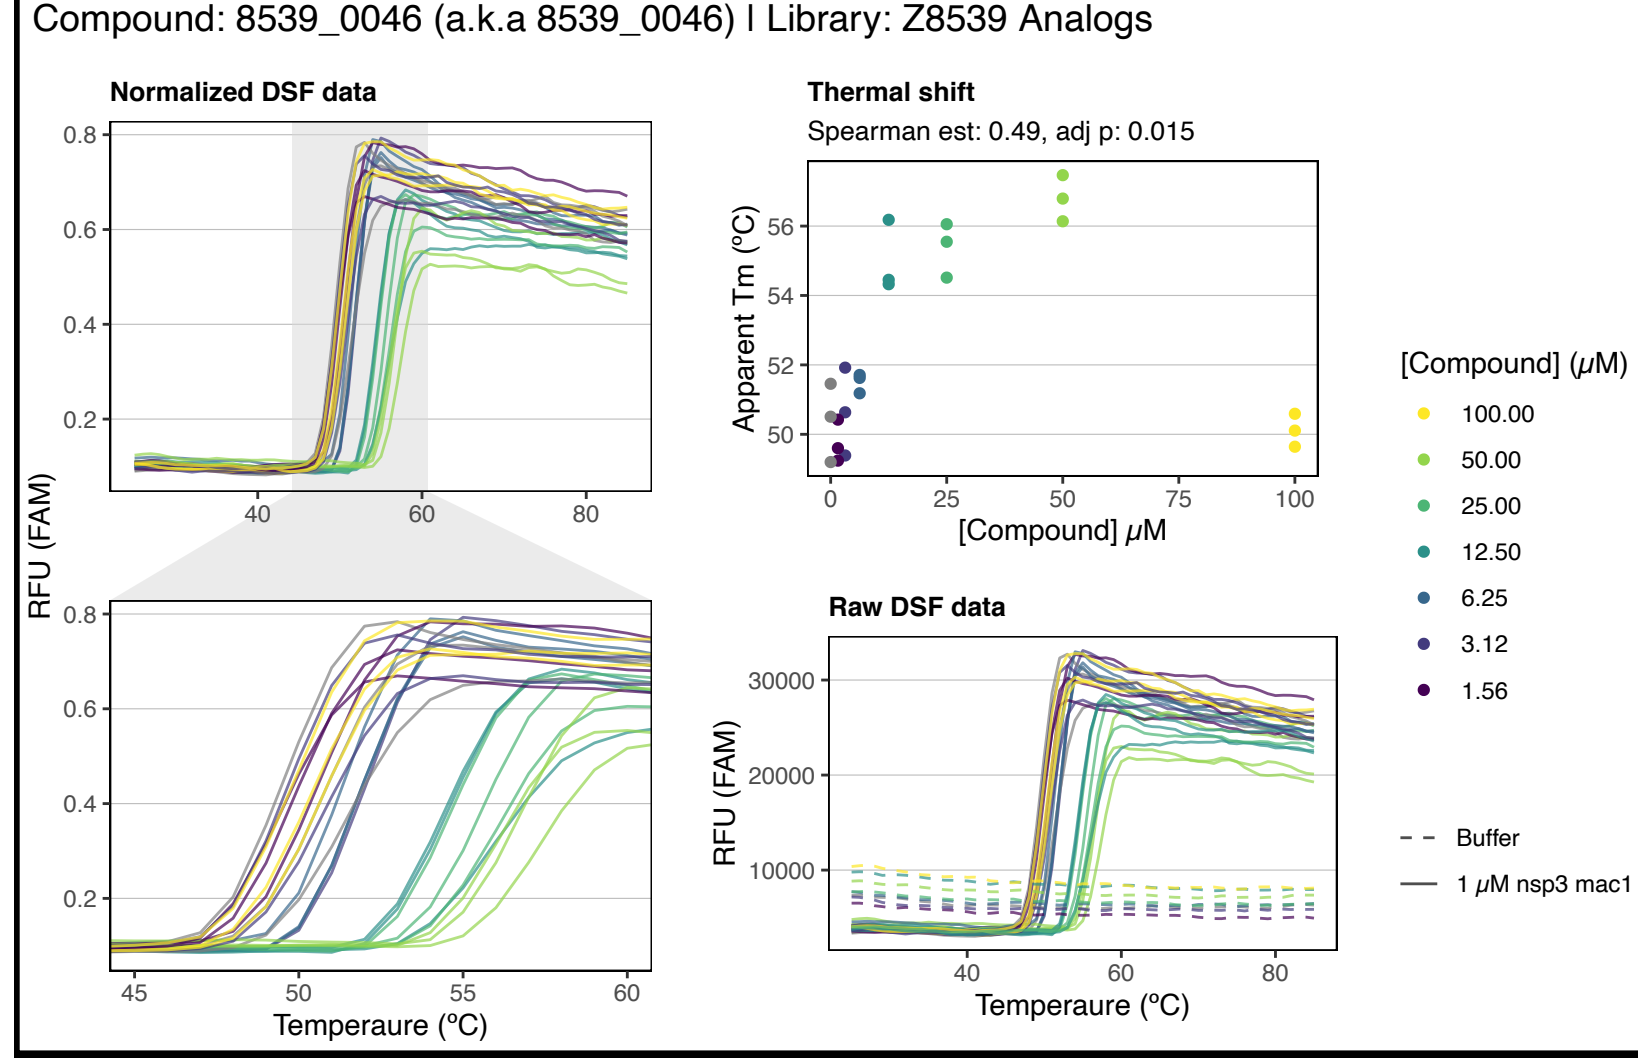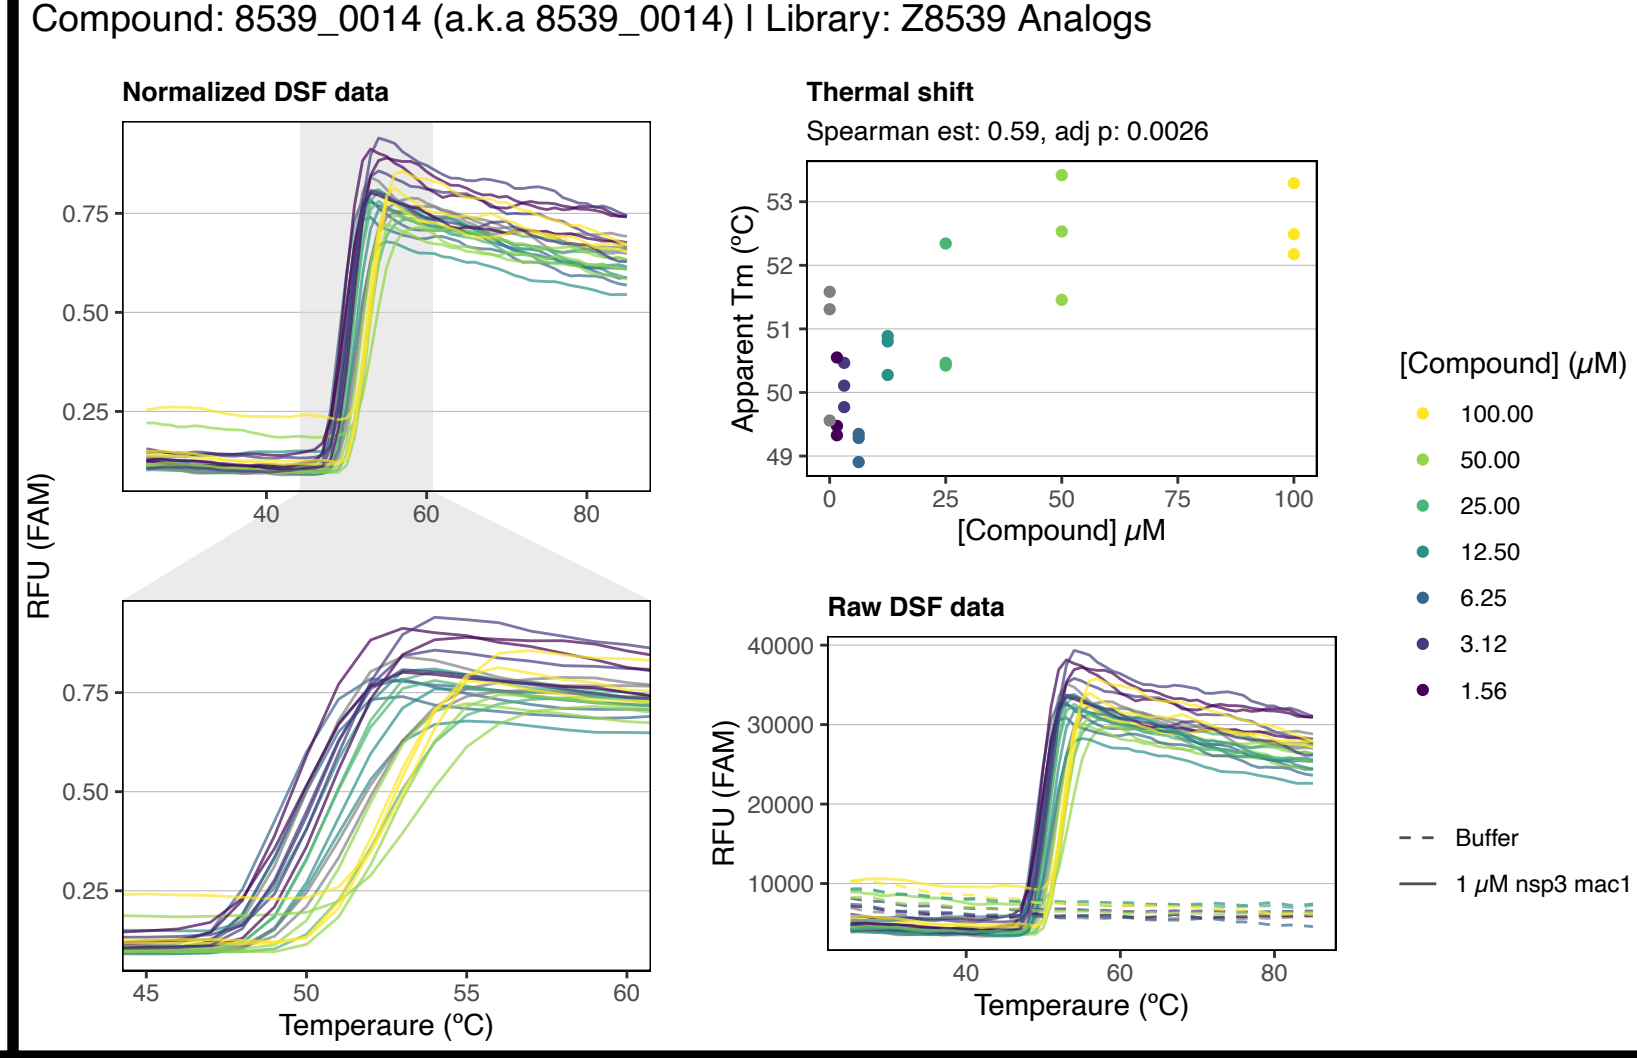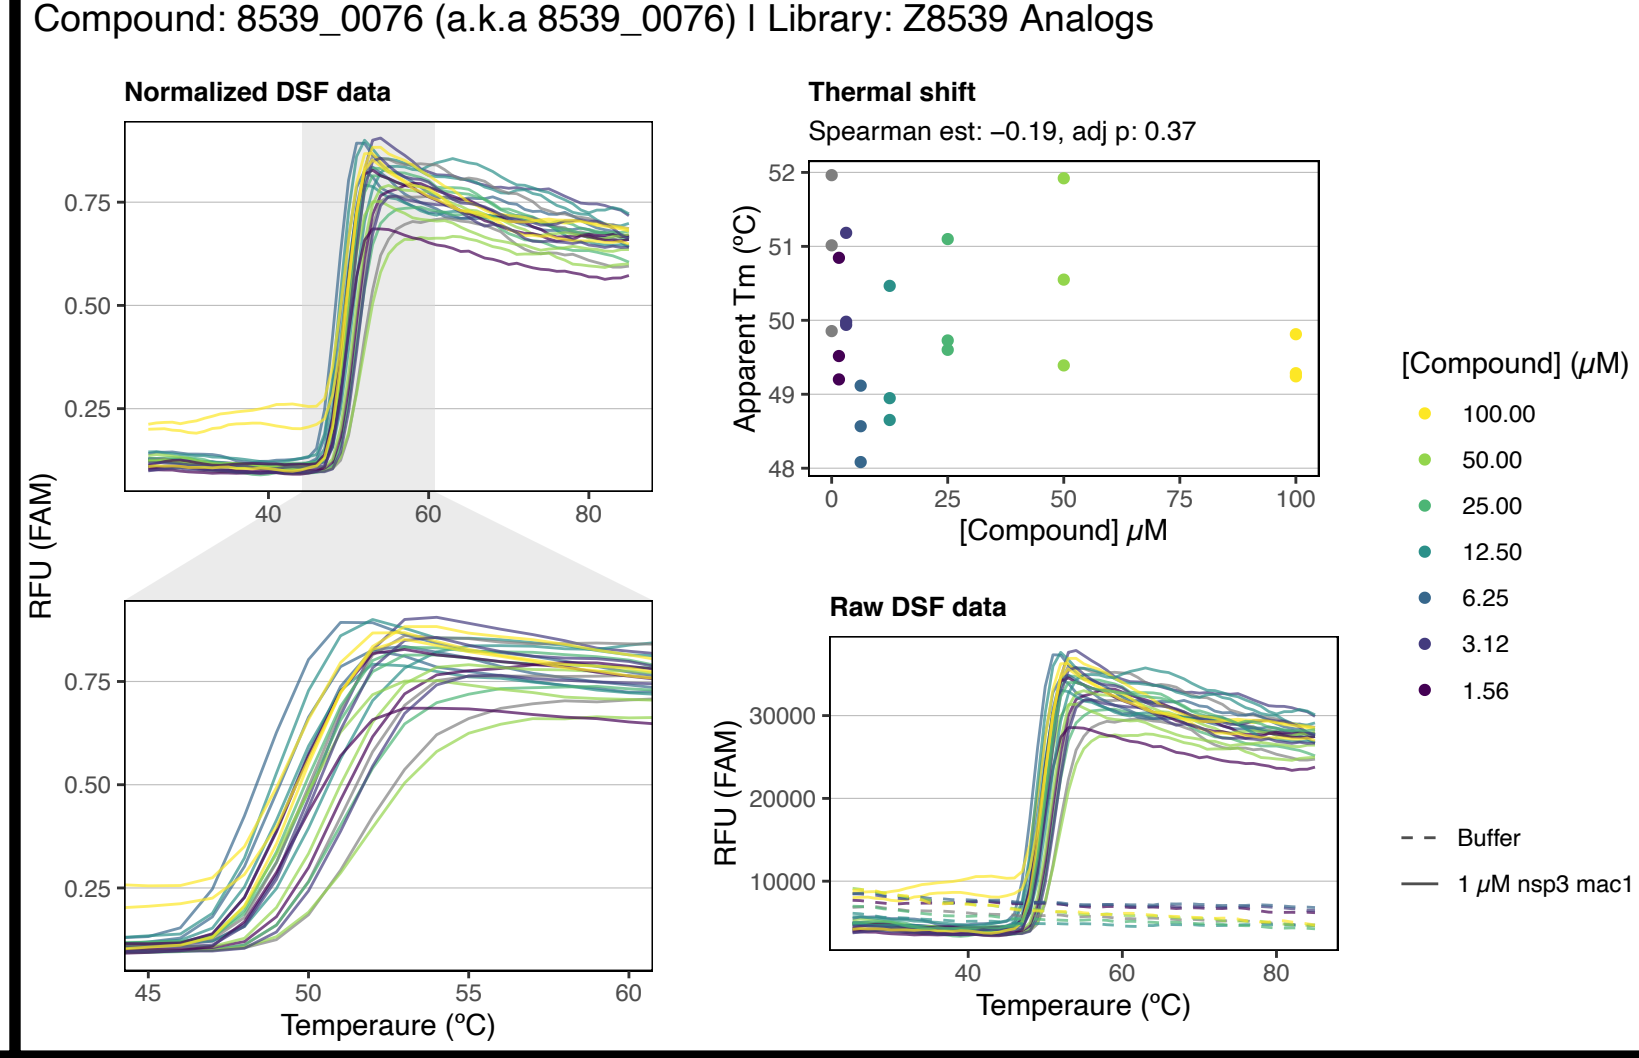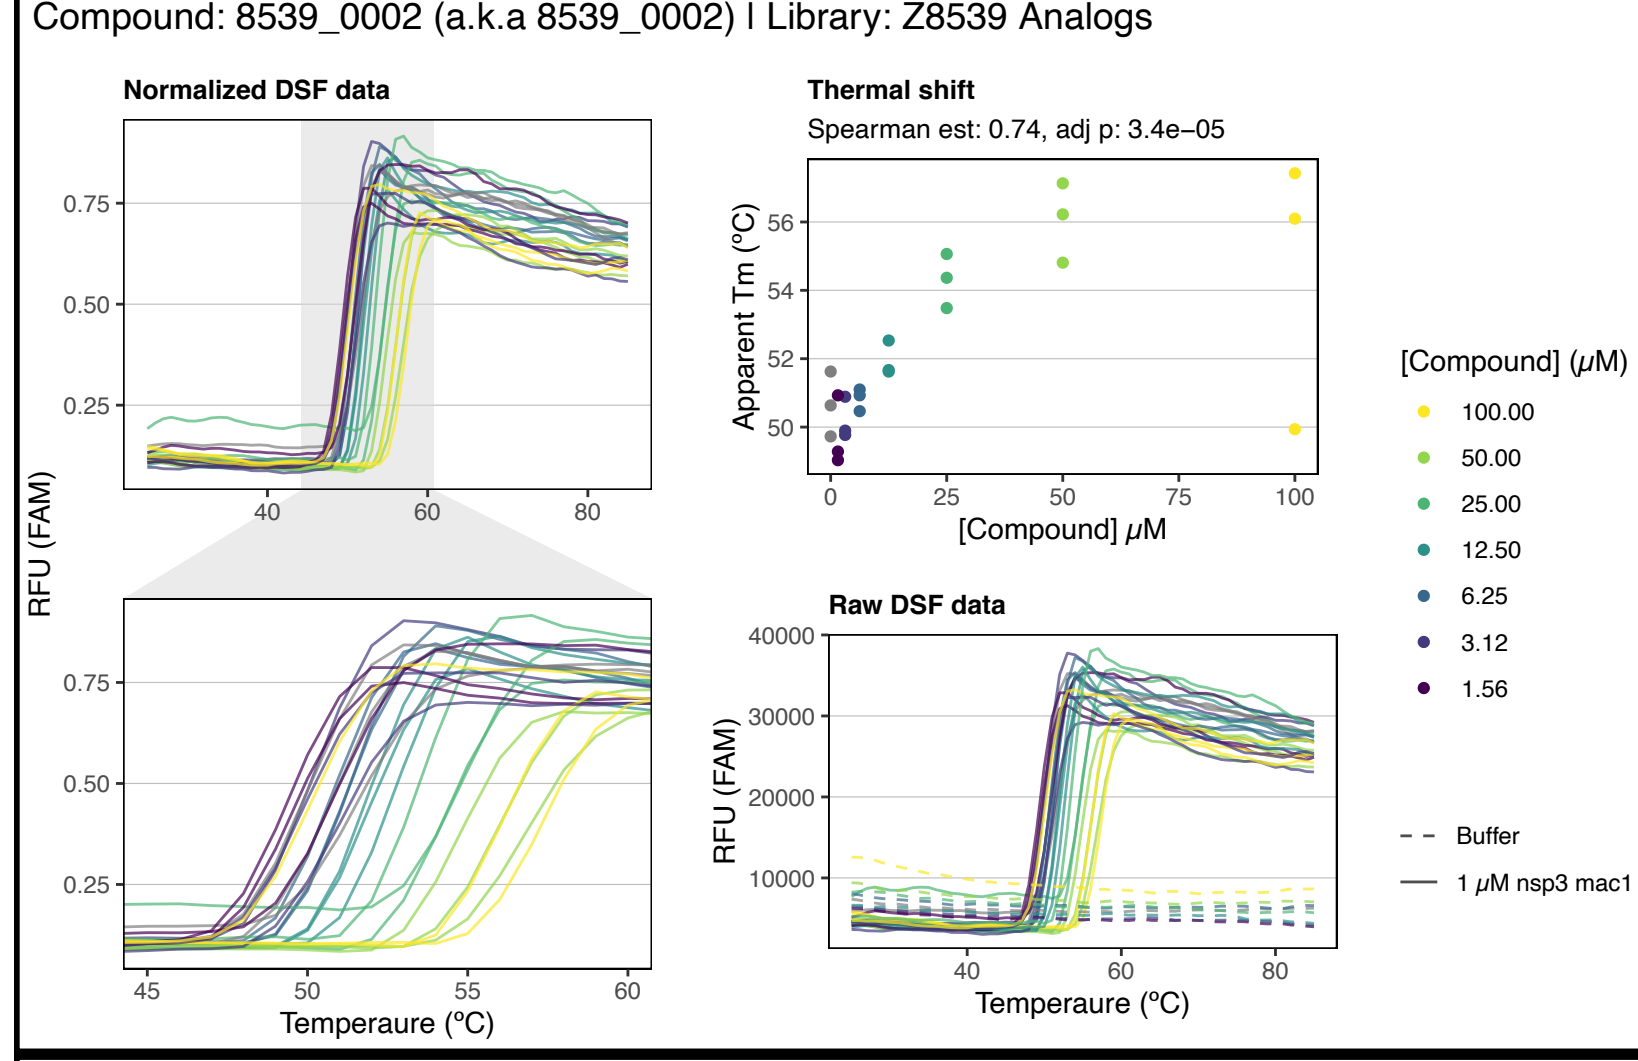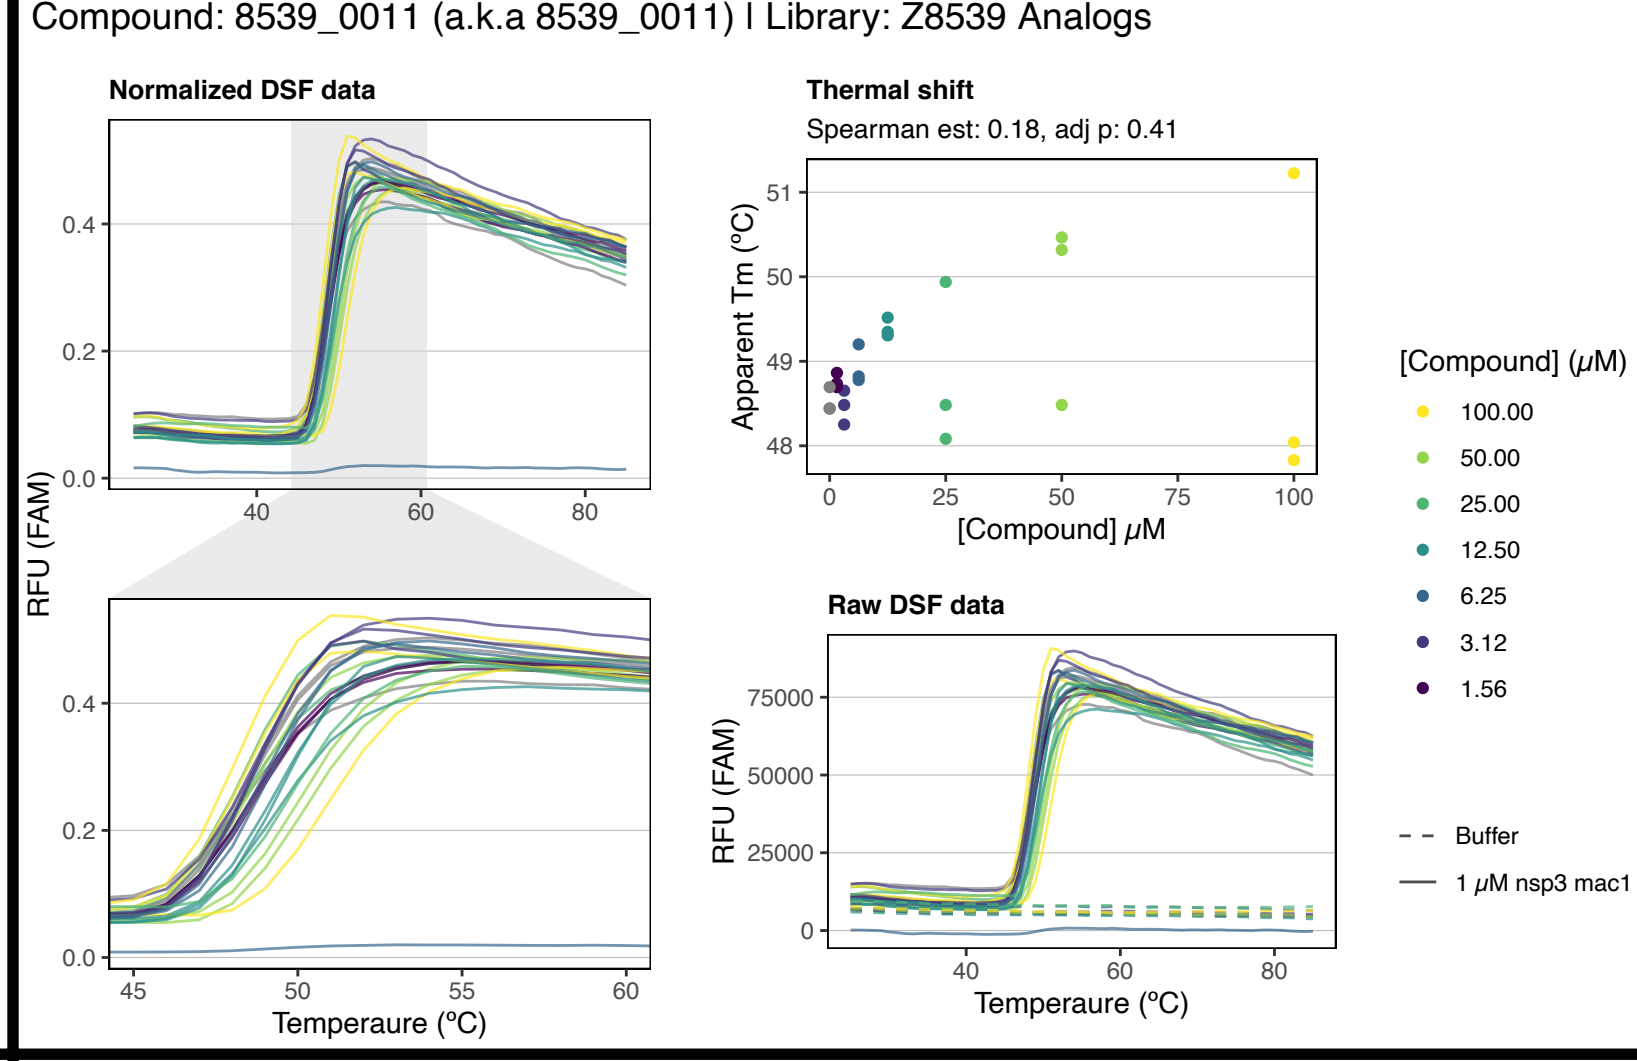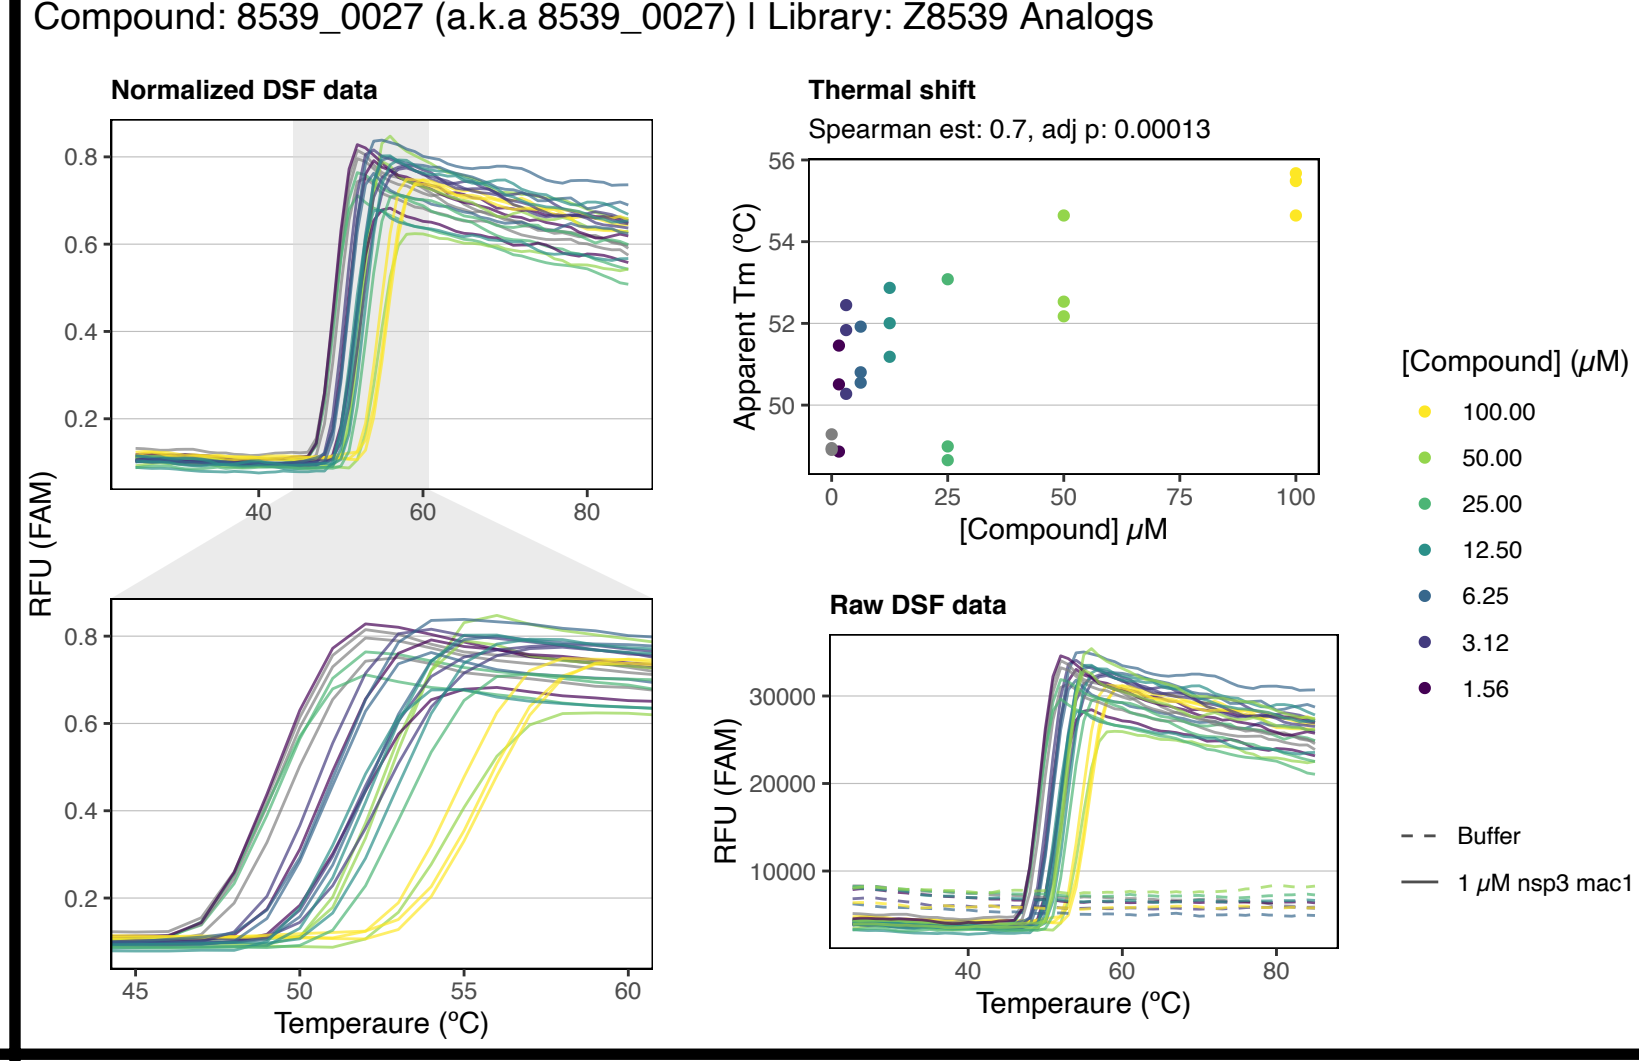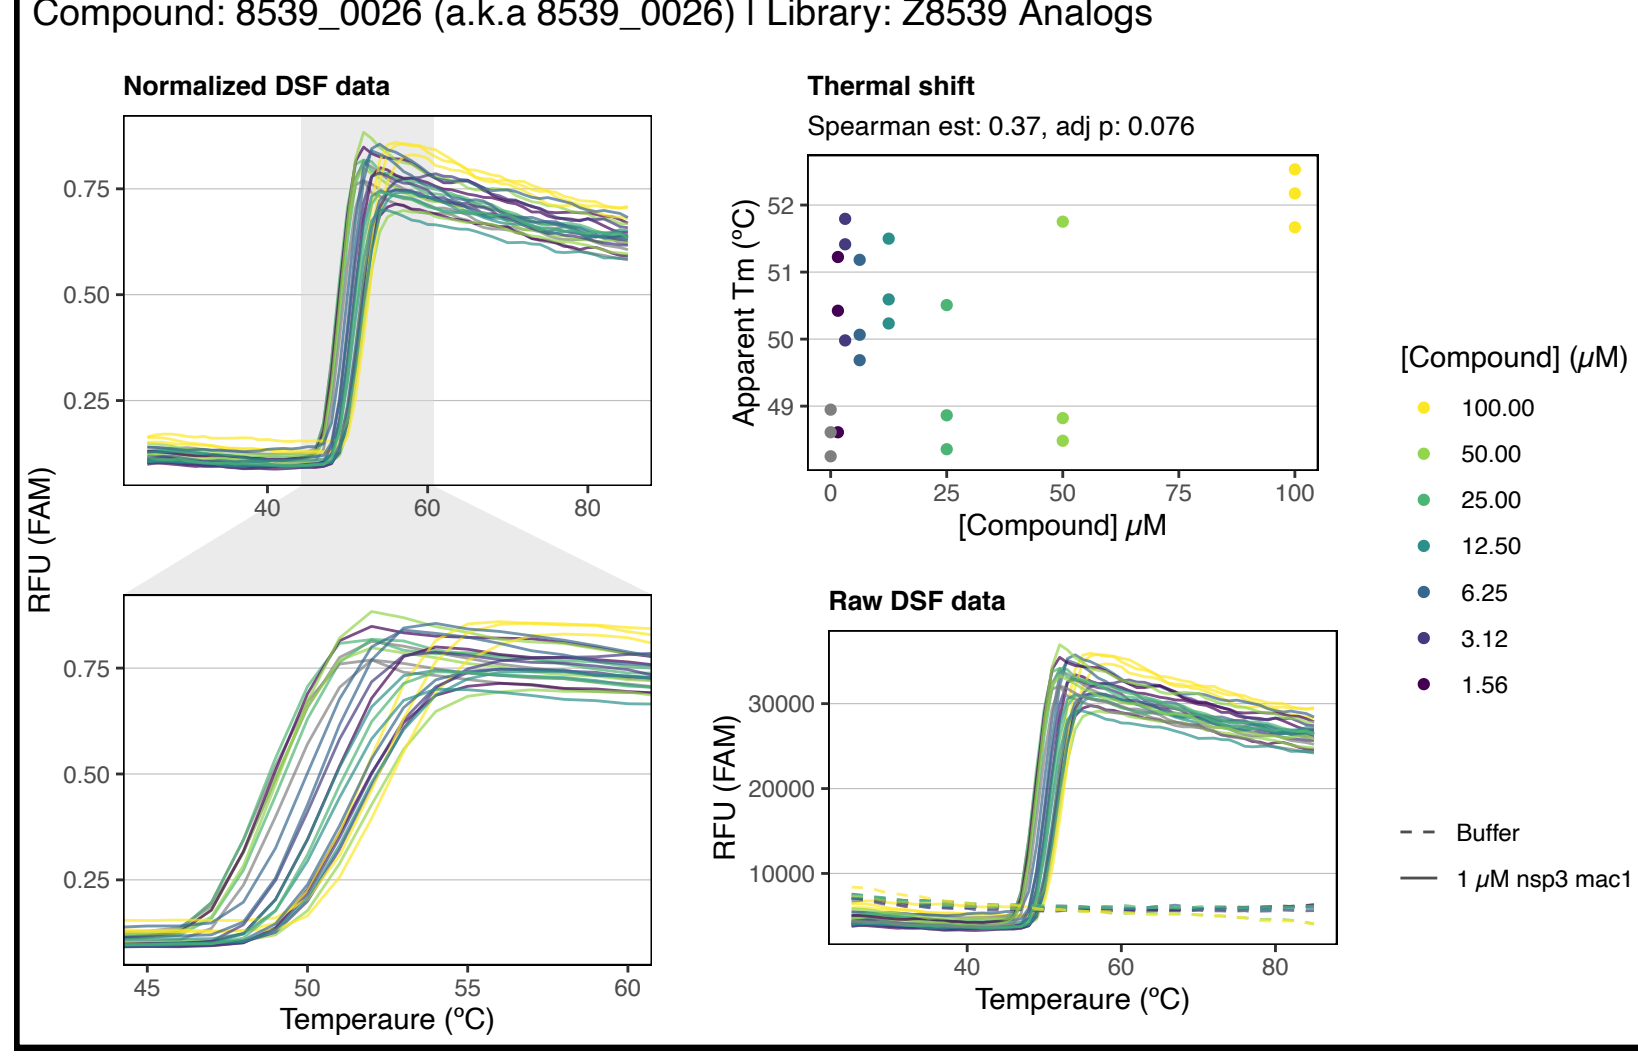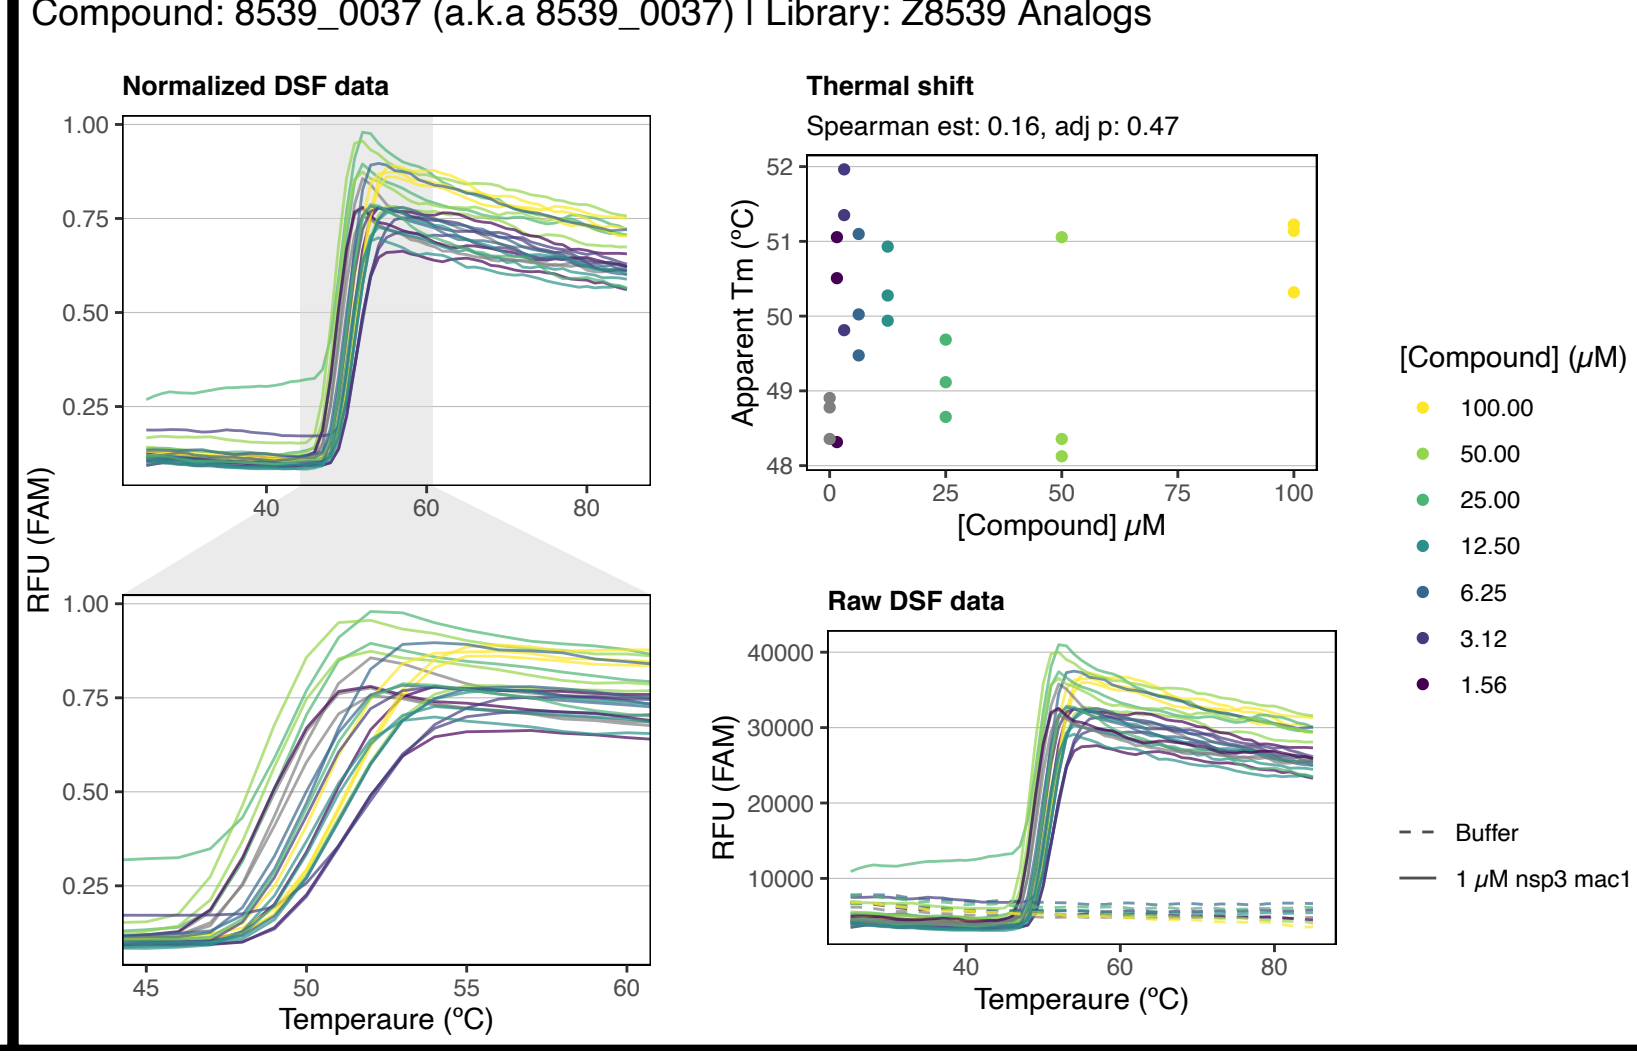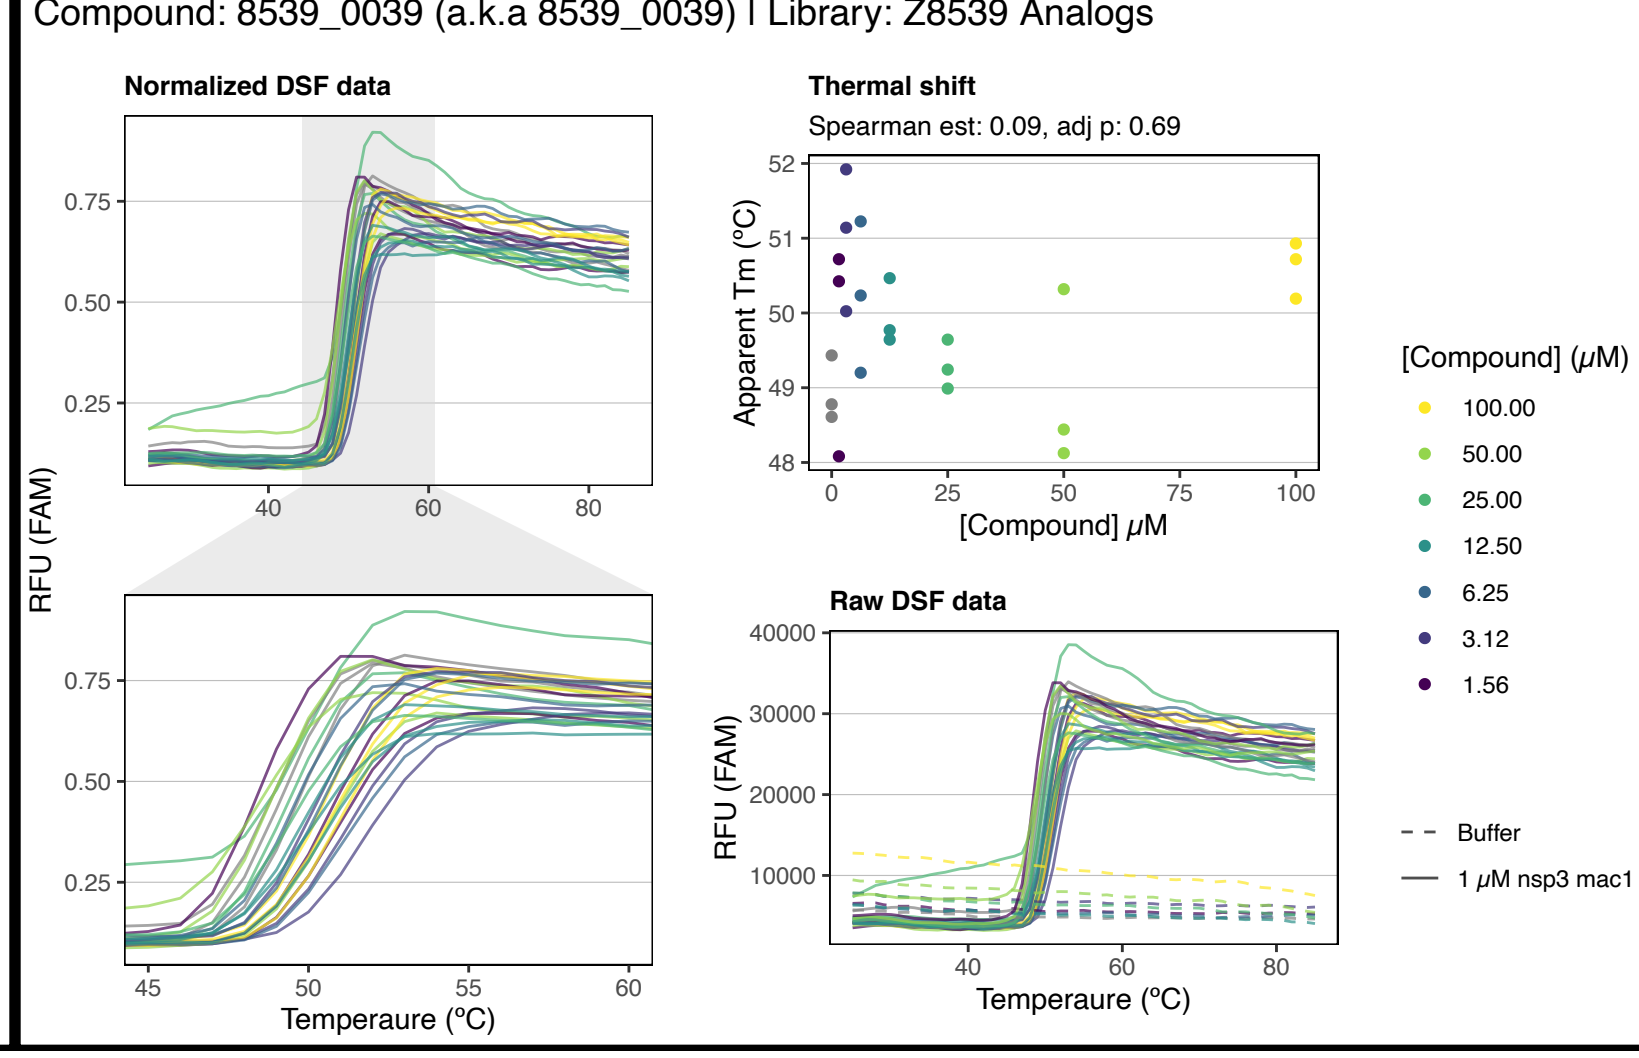

Compound: 8539\_0041 (a.k.a 8539\_0041) | Library: Z8539 Analogs

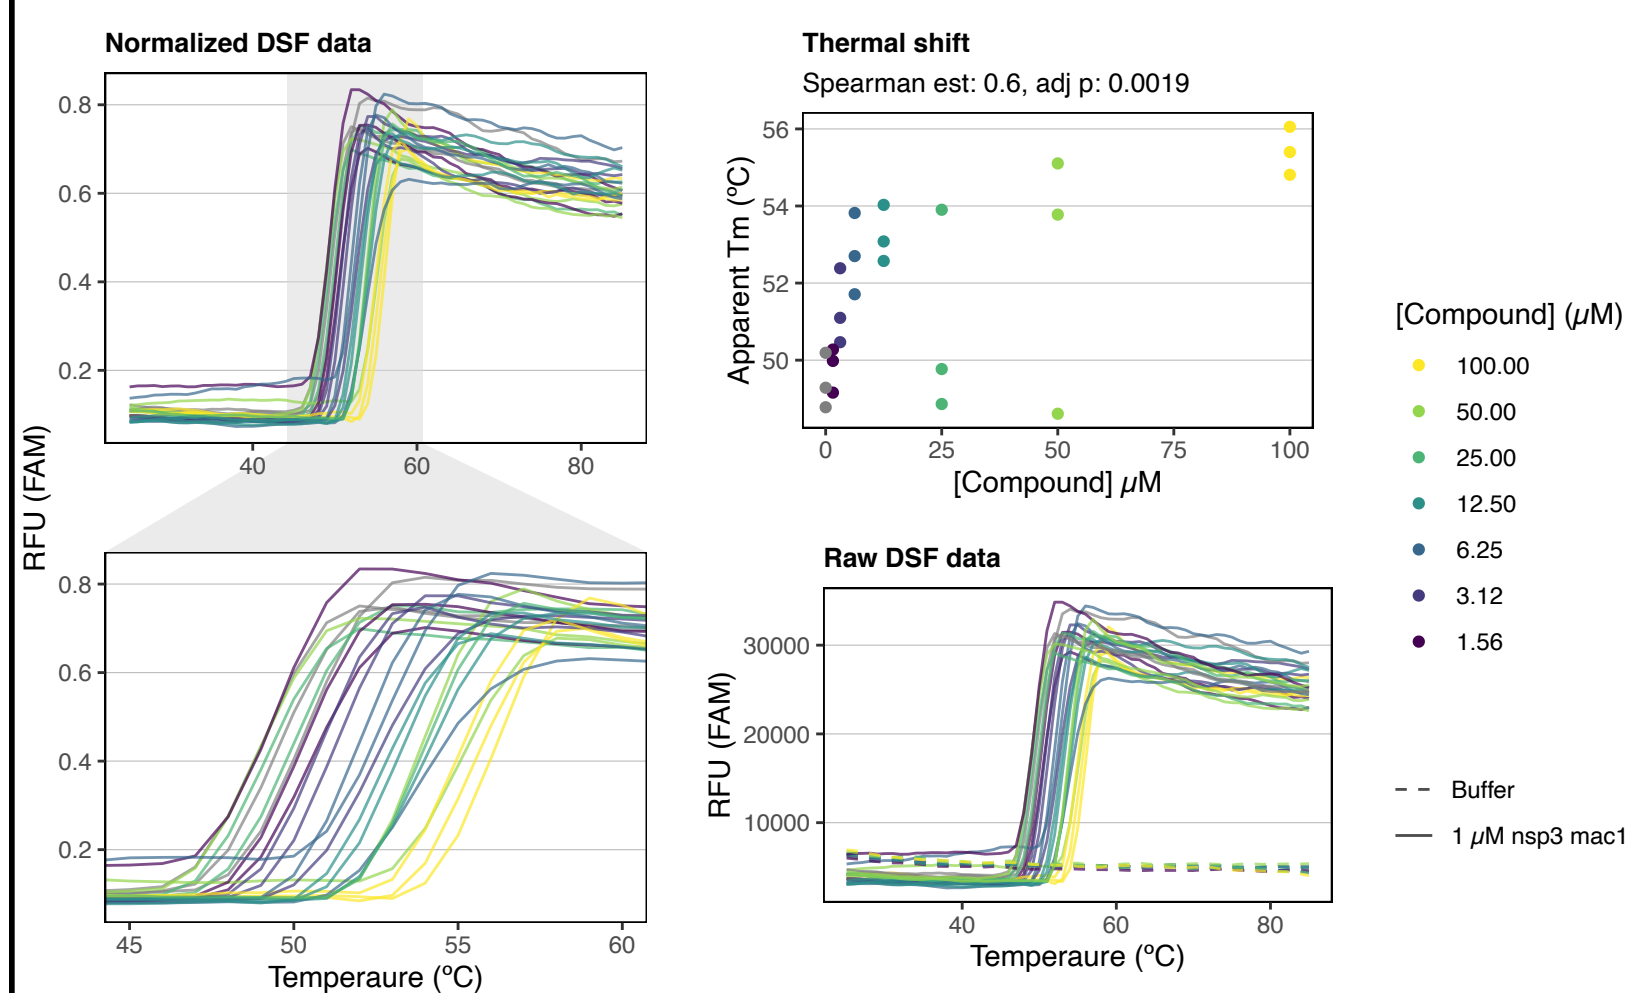

Compound: 8539\_0009 (a.k.a 8539\_0009) | Library: Z8539 Analogs

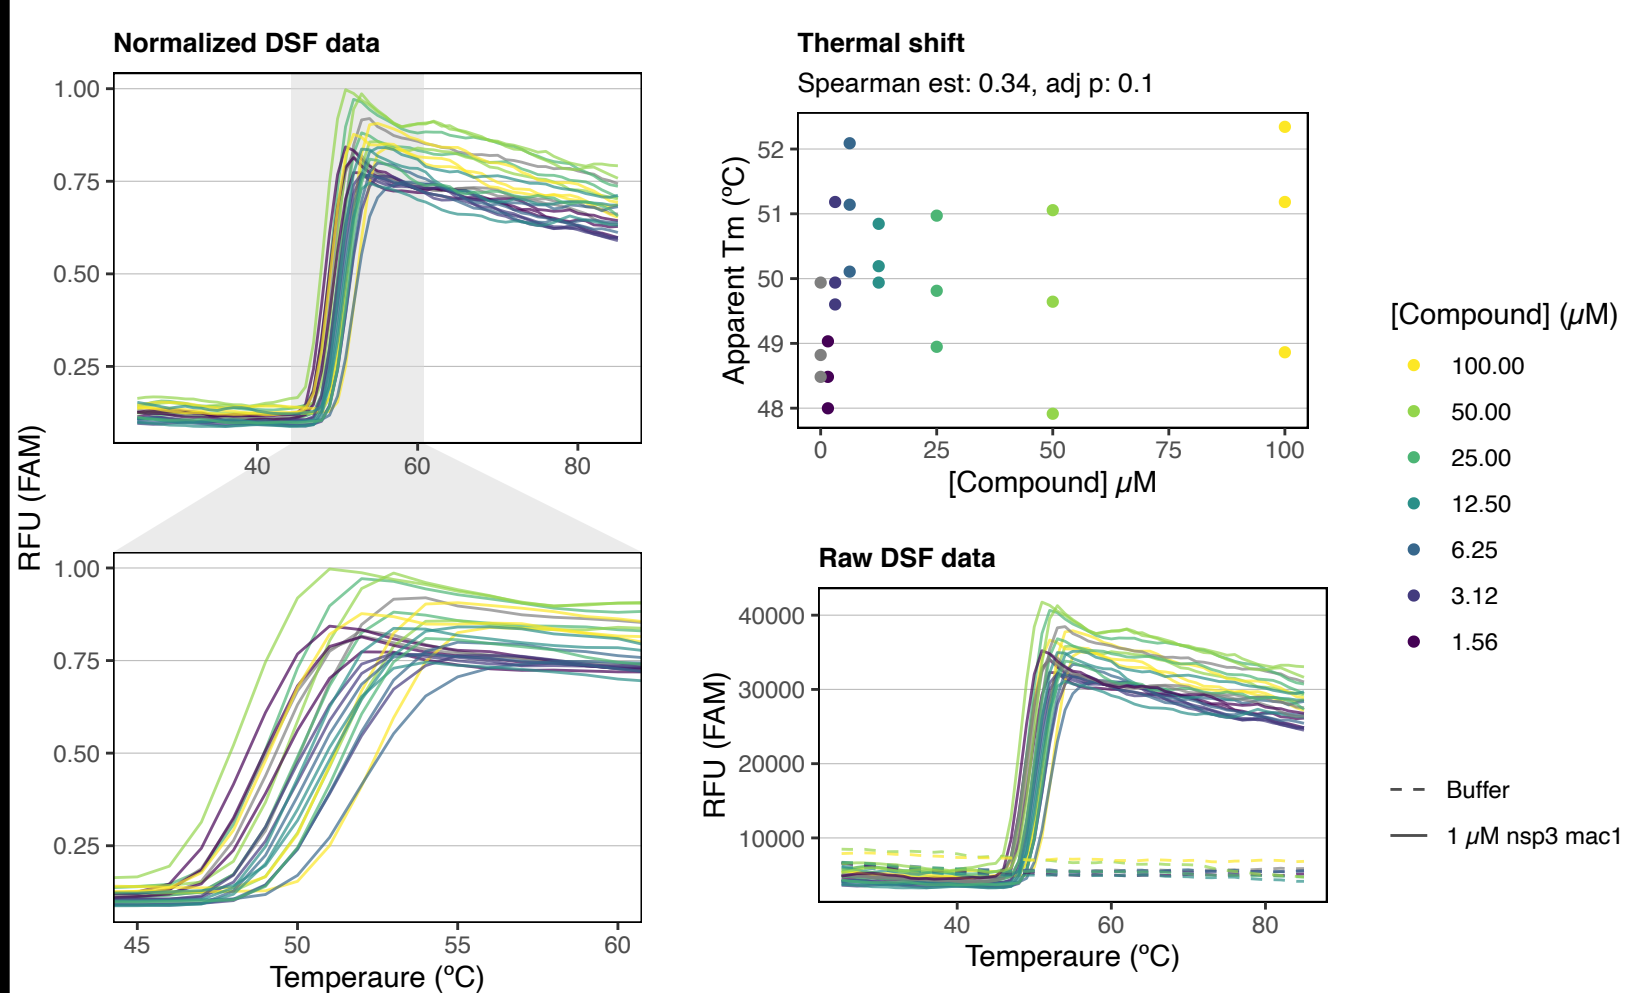

Compound: 8539\_0007 (a.k.a 8539\_0007) | Library: Z8539 Analogs

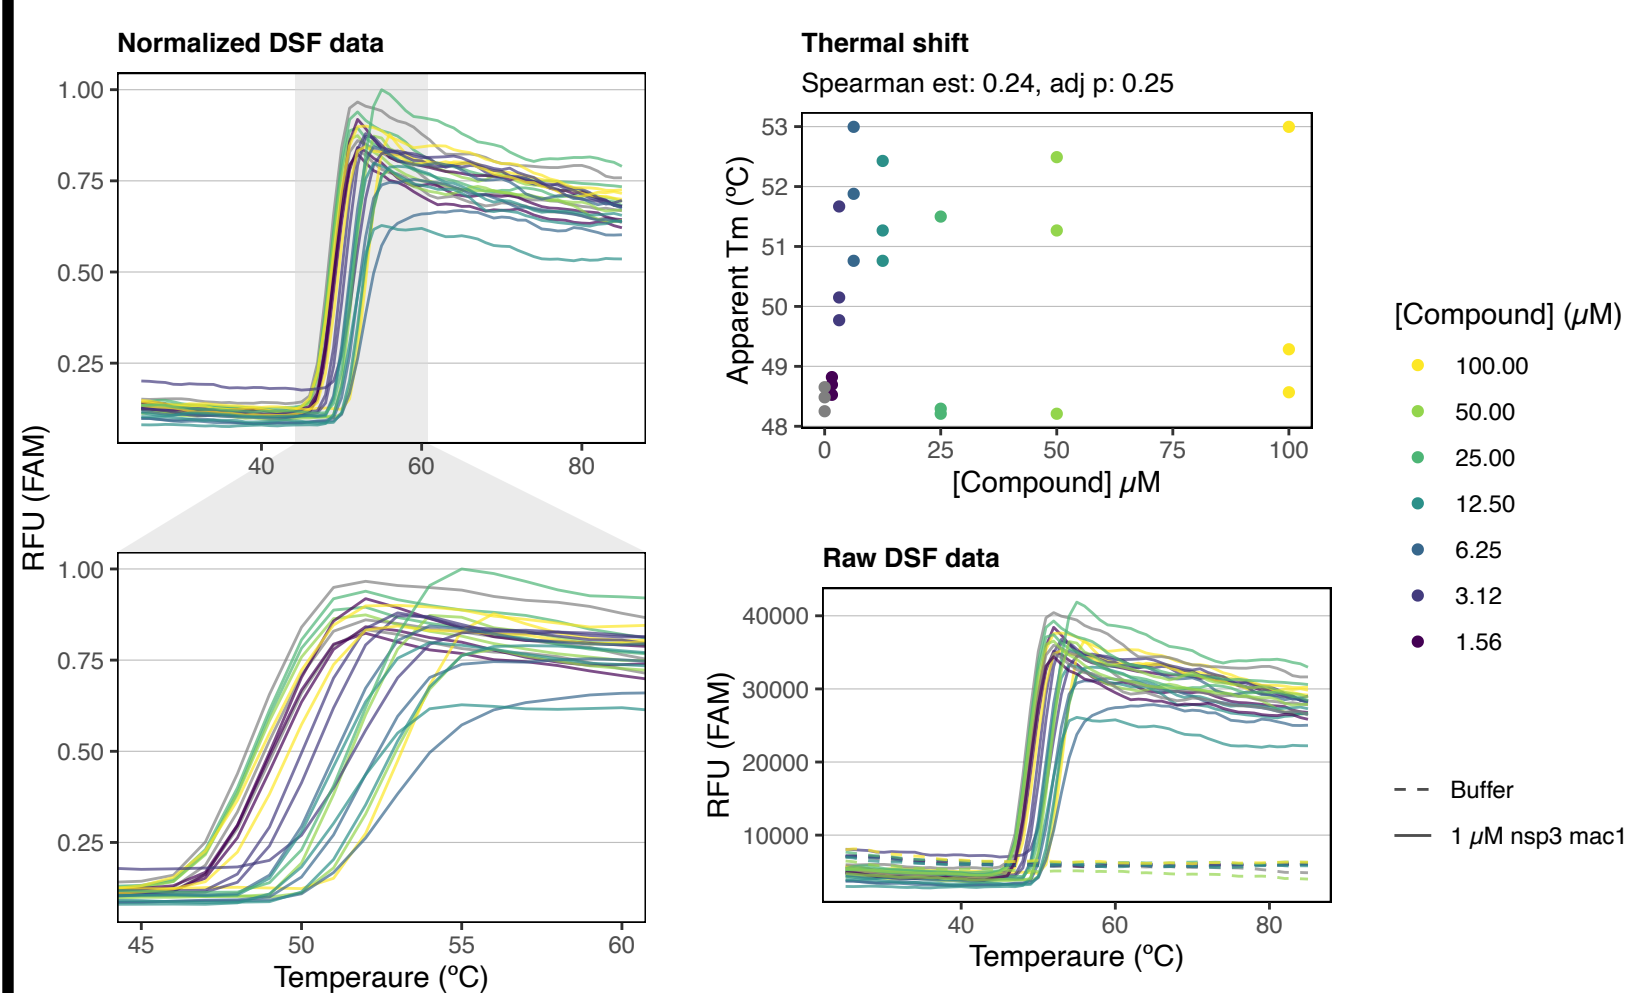

Compound: 8539\_0023 (a.k.a 8539\_0023) | Library: Z8539 Analogs

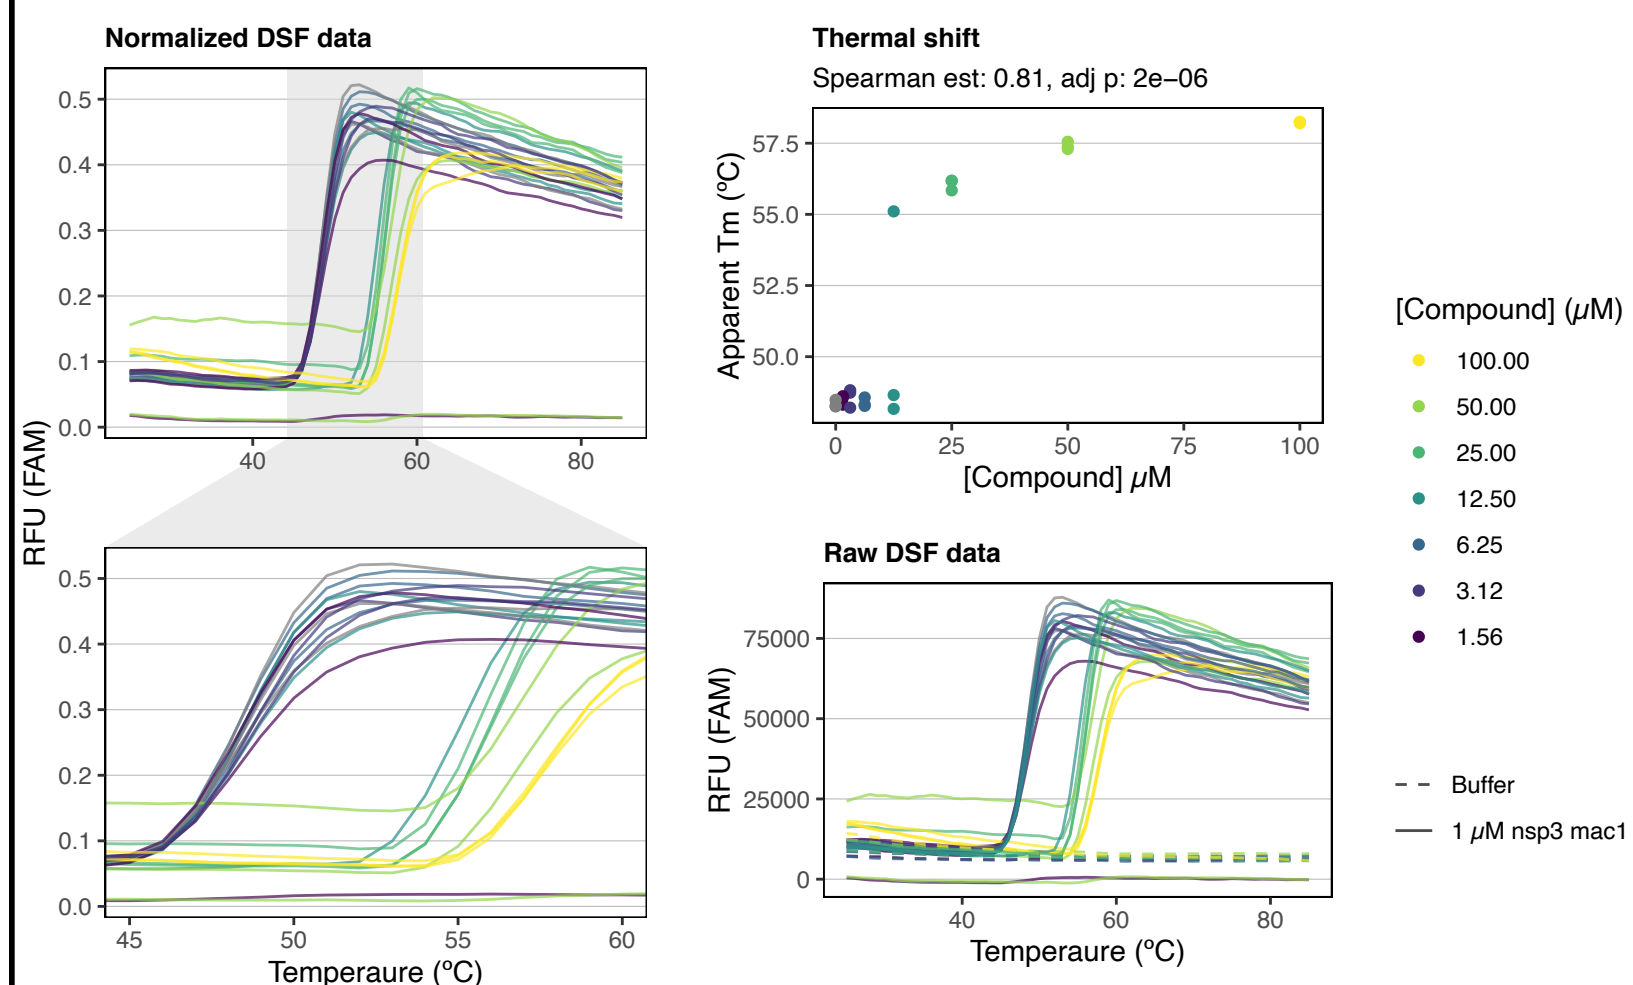

Compound: 8539\_0006 (a.k.a 8539\_0006) | Library: Z8539 Analogs

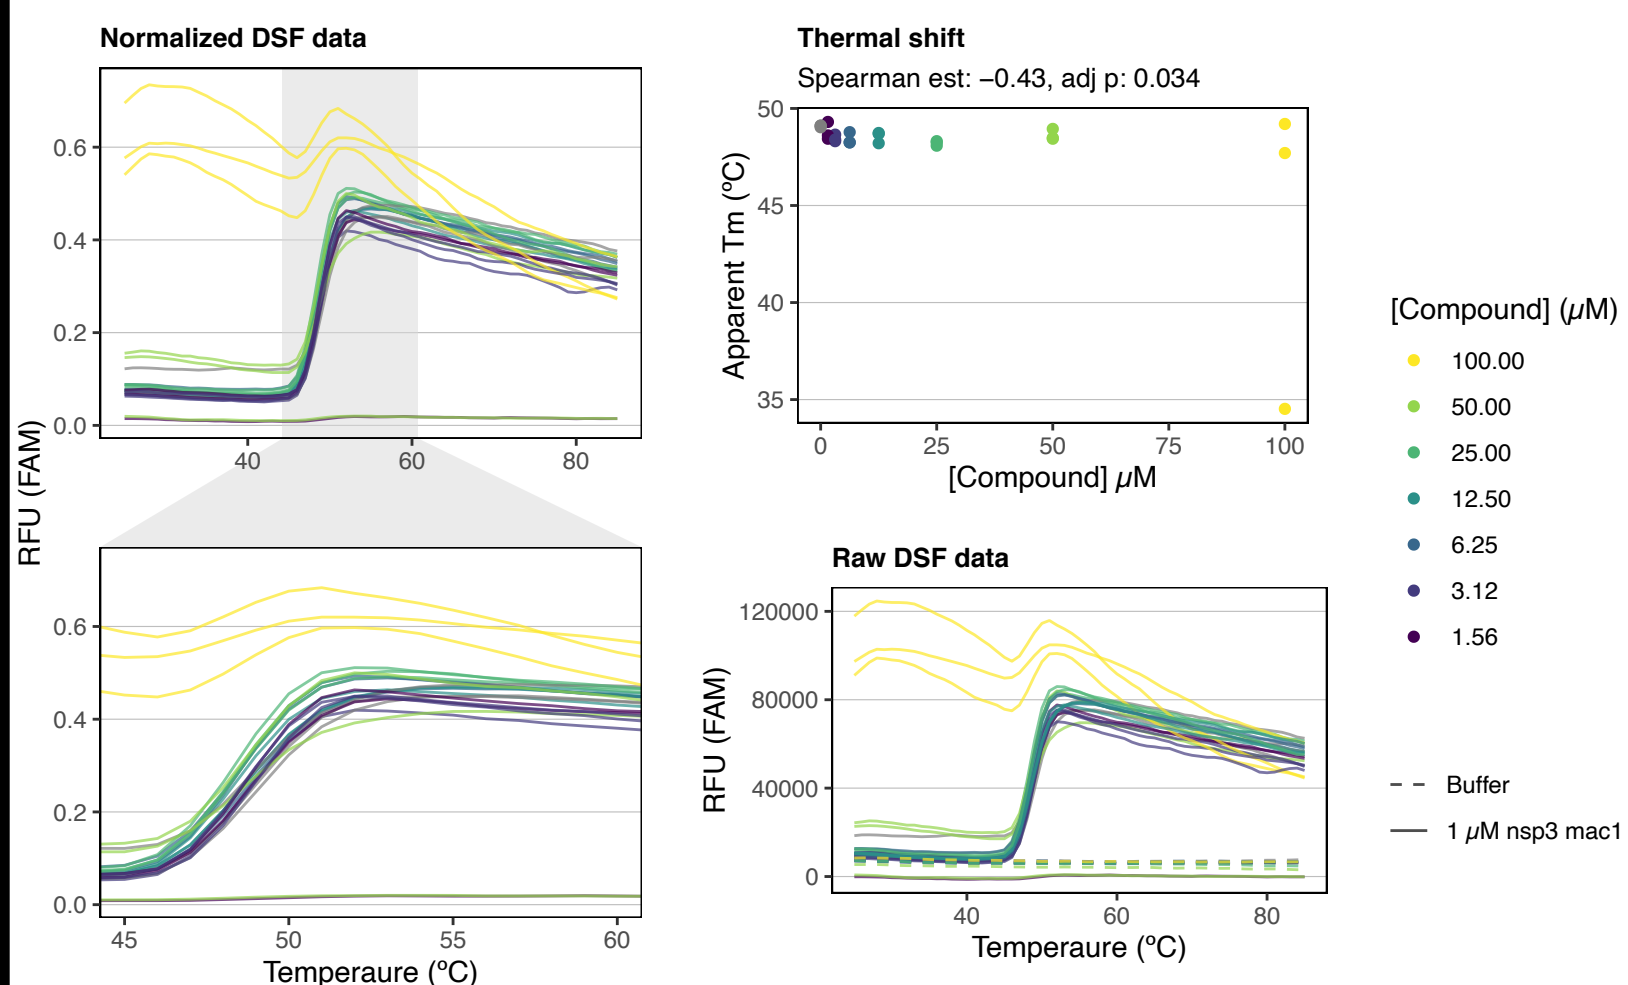

Supplement: pnas.2212931120.sd07.pdf [file pnas.2212931120.sd07.pdf]
