# Supplementary material for: Iterative computational design and crystallographic screening identifies potent inhibitors targeting the Nsp3 macrodomain of SARS-CoV-2
Source: PubMed Central journal article supplement (PMC9926234; doi:10.1073/pnas.2212931120), 2023-01-04

**Dataset S3:** Crystal structures of Mac1 in complex with compounds from the Z8539 series. PanDDA event maps are shown for ligands (contoured at 2  $\sigma$ ). Protein-ligand hydrogen bonds are shown with dashed black lines. Hydrogen bonds between ligands and the Lys11 backbone nitrogen of a symmetry mate are highlighted with purple spheres/dashes.

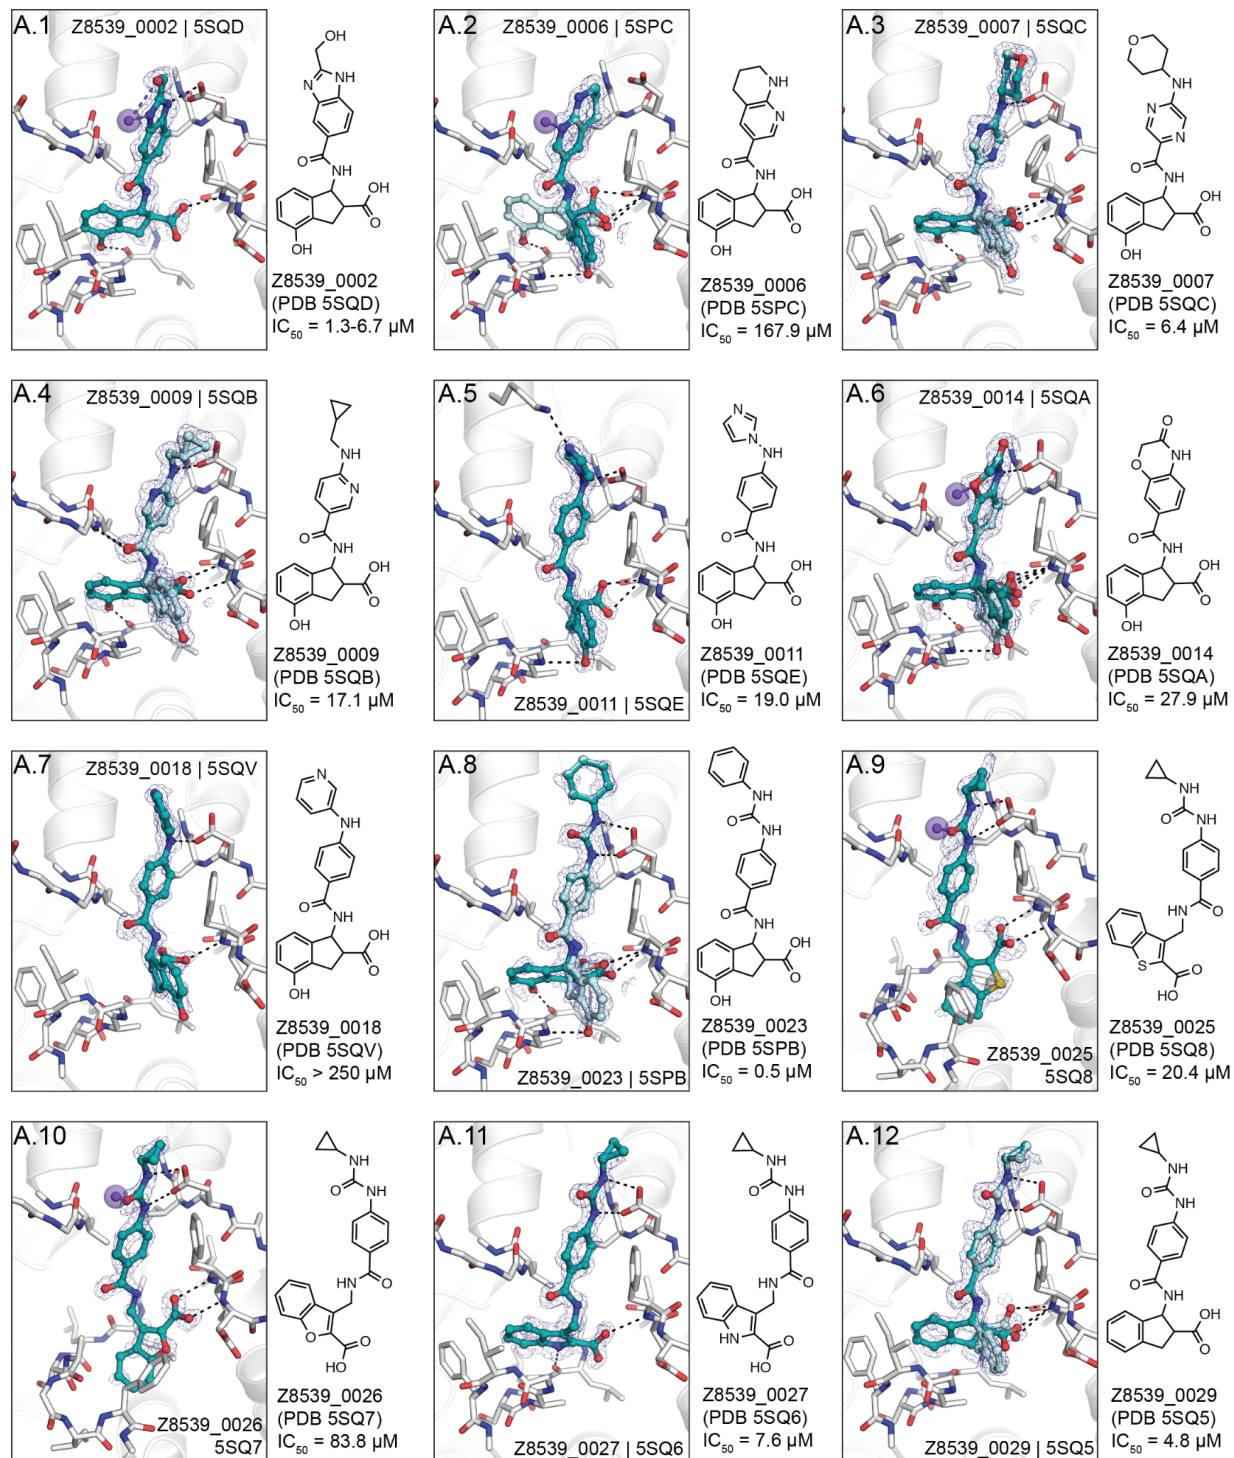

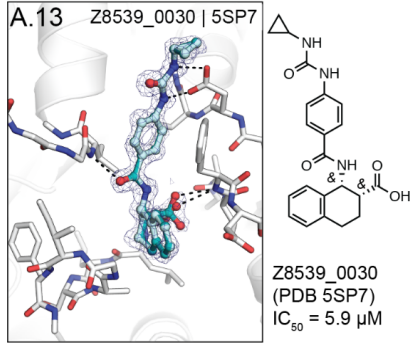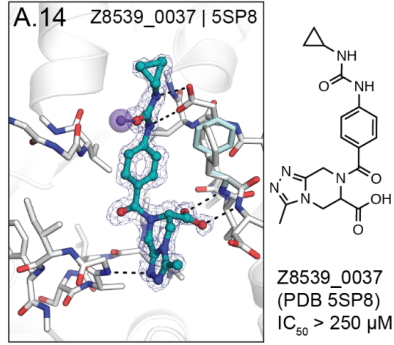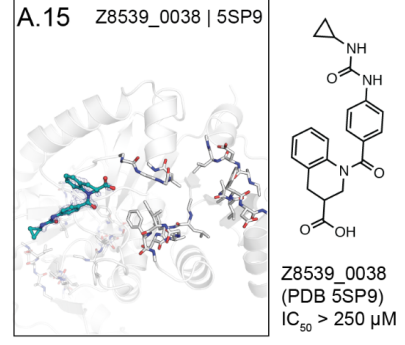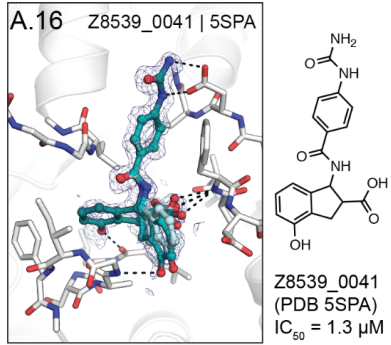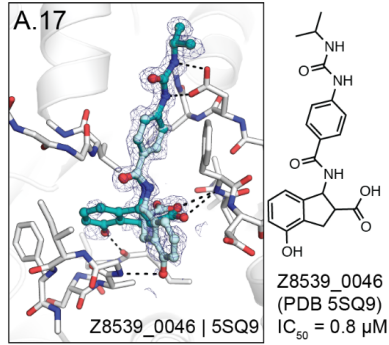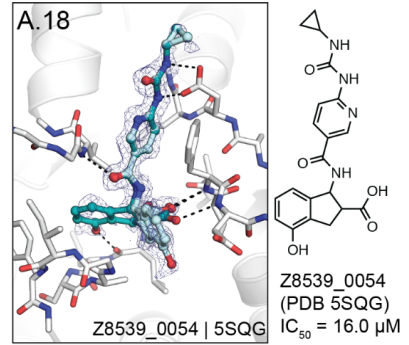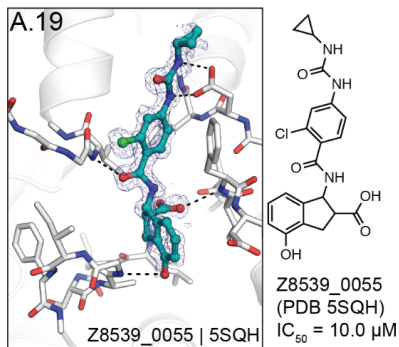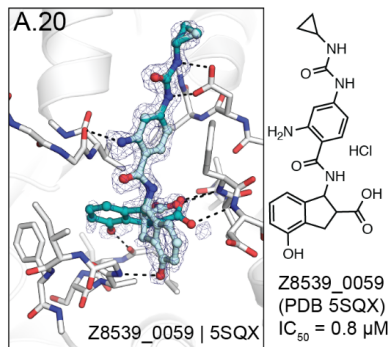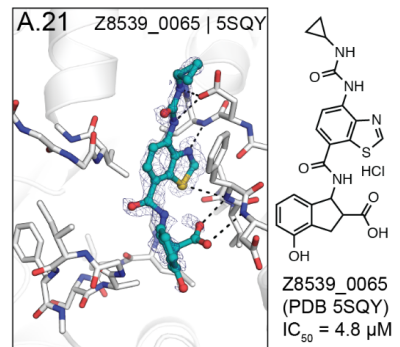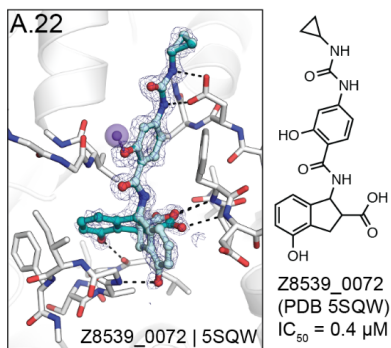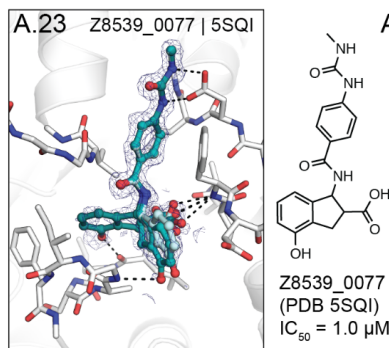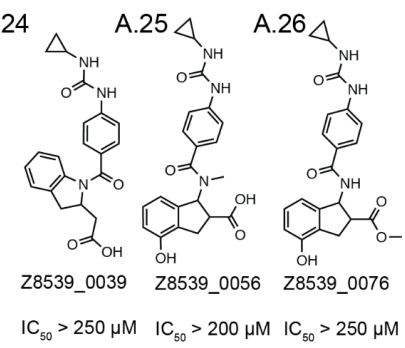

Supplement: pnas.2212931120.sd03.pdf [file pnas.2212931120.sd03.pdf]
