# Supplementary material for: Iterative computational design and crystallographic screening identifies potent inhibitors targeting the Nsp3 macrodomain of SARS-CoV-2
Source: PubMed Central journal article supplement (PMC9926234; doi:10.1073/pnas.2212931120), 2023-01-04
Supplement: pnas.2212931120.sd04.pdf [file pnas.2212931120.sd04.pdf]

**Dataset S4:** Crystal structures of Mac1 in complex with docking hits. PanDDA event maps are shown for ligands (contoured at  $2\sigma$ ). Protein-ligand hydrogen bonds are shown with dashed black lines. Hydrogen bonds between ligands and the Lys11 backbone nitrogen of a symmetry mate are highlighted with purple spheres/dashes.

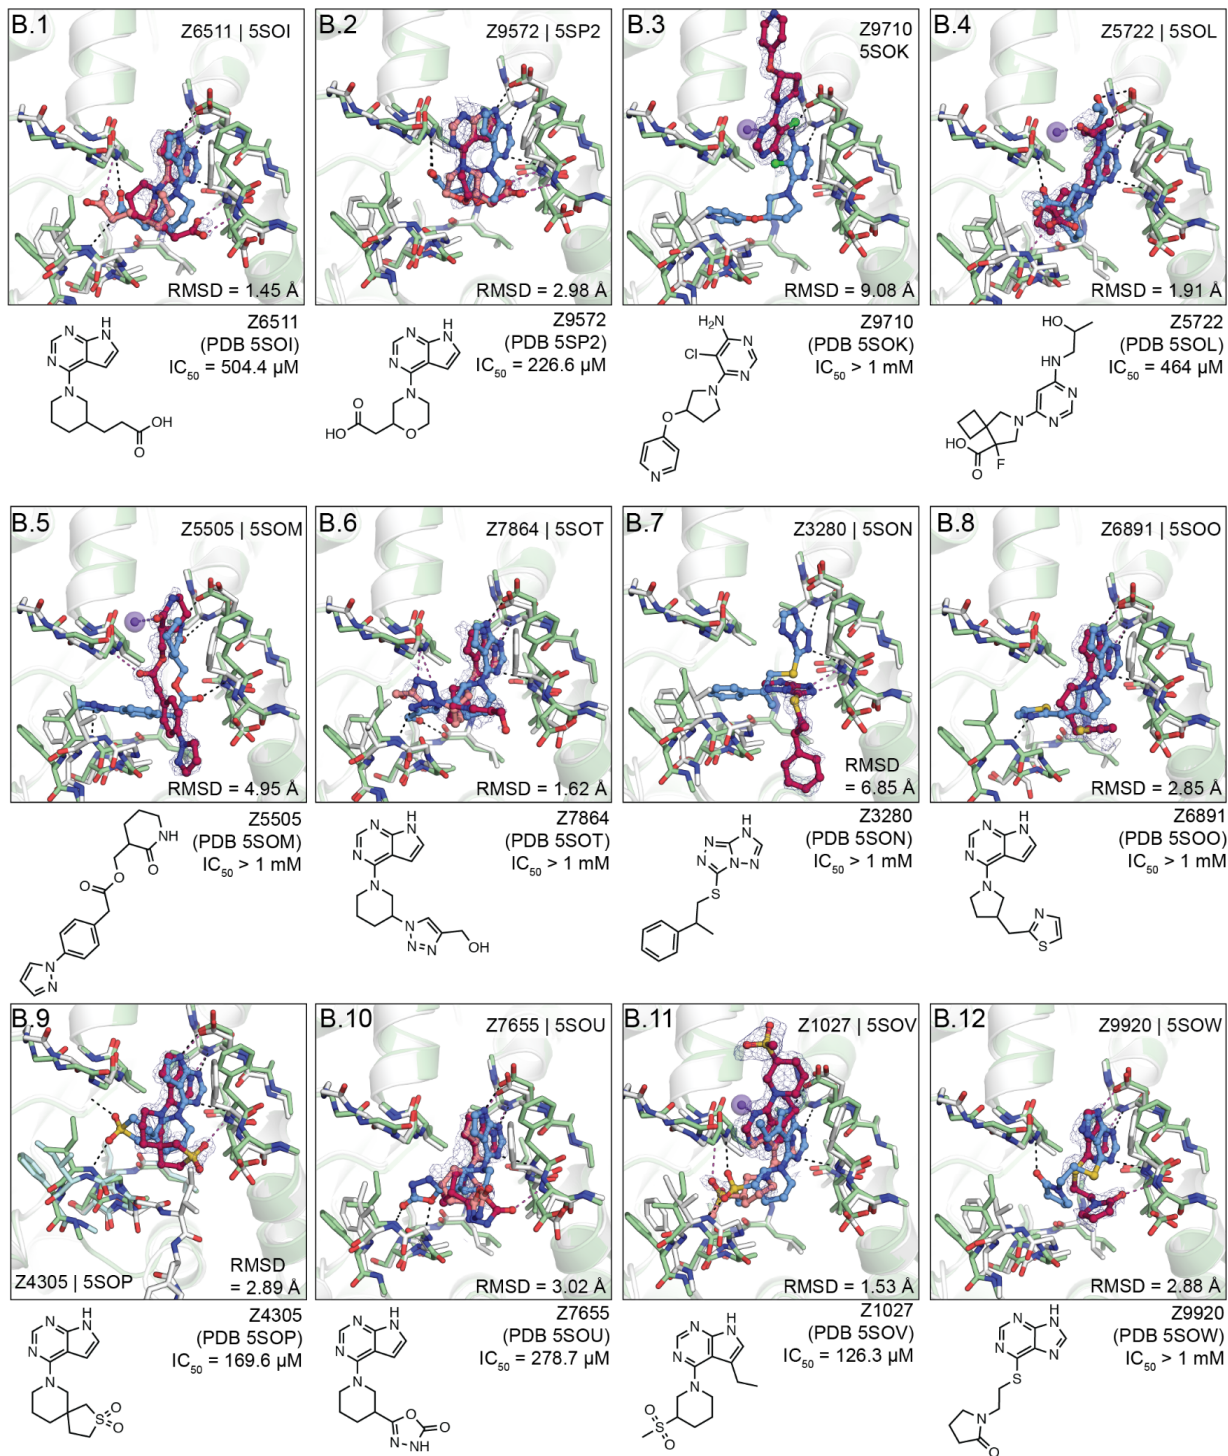

1<sup>st</sup> Screen Docking Template

Docking Prediction

Crystal Structure

Solved Pose

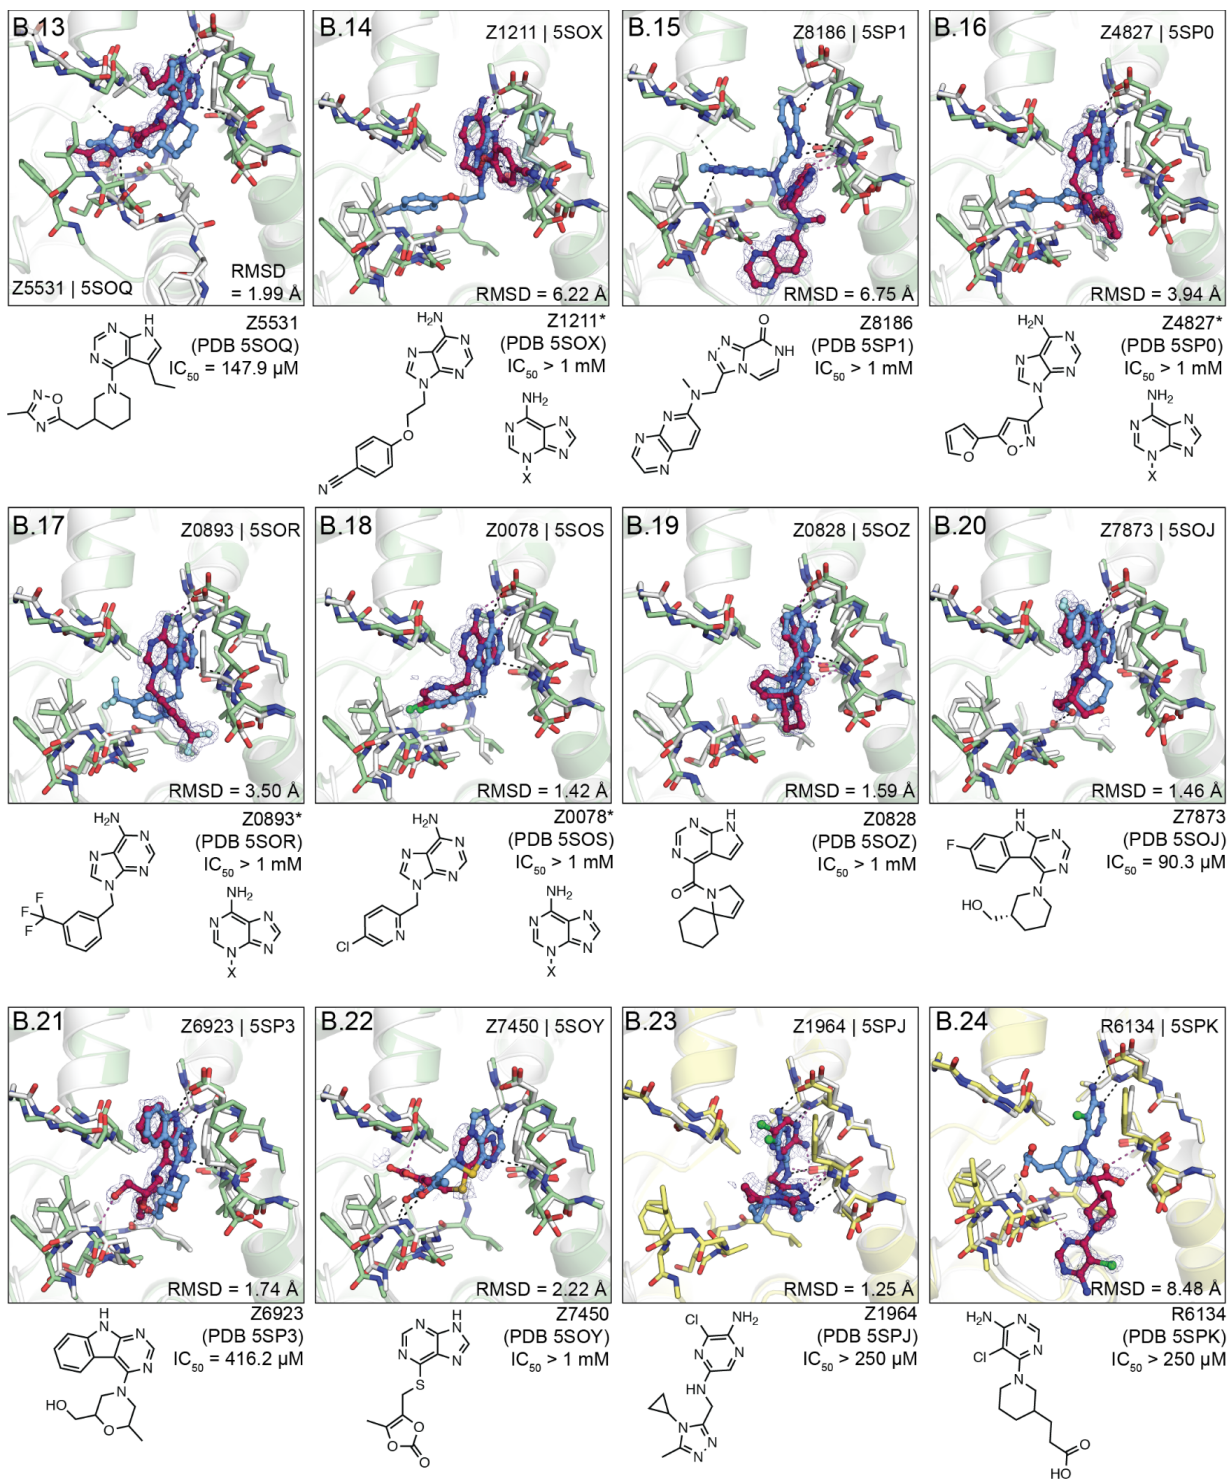

1<sup>st</sup> Screen Docking Template | 2<sup>nd</sup> Screen Docking Template | Docking Prediction | Crystal Structure | Solved Pose

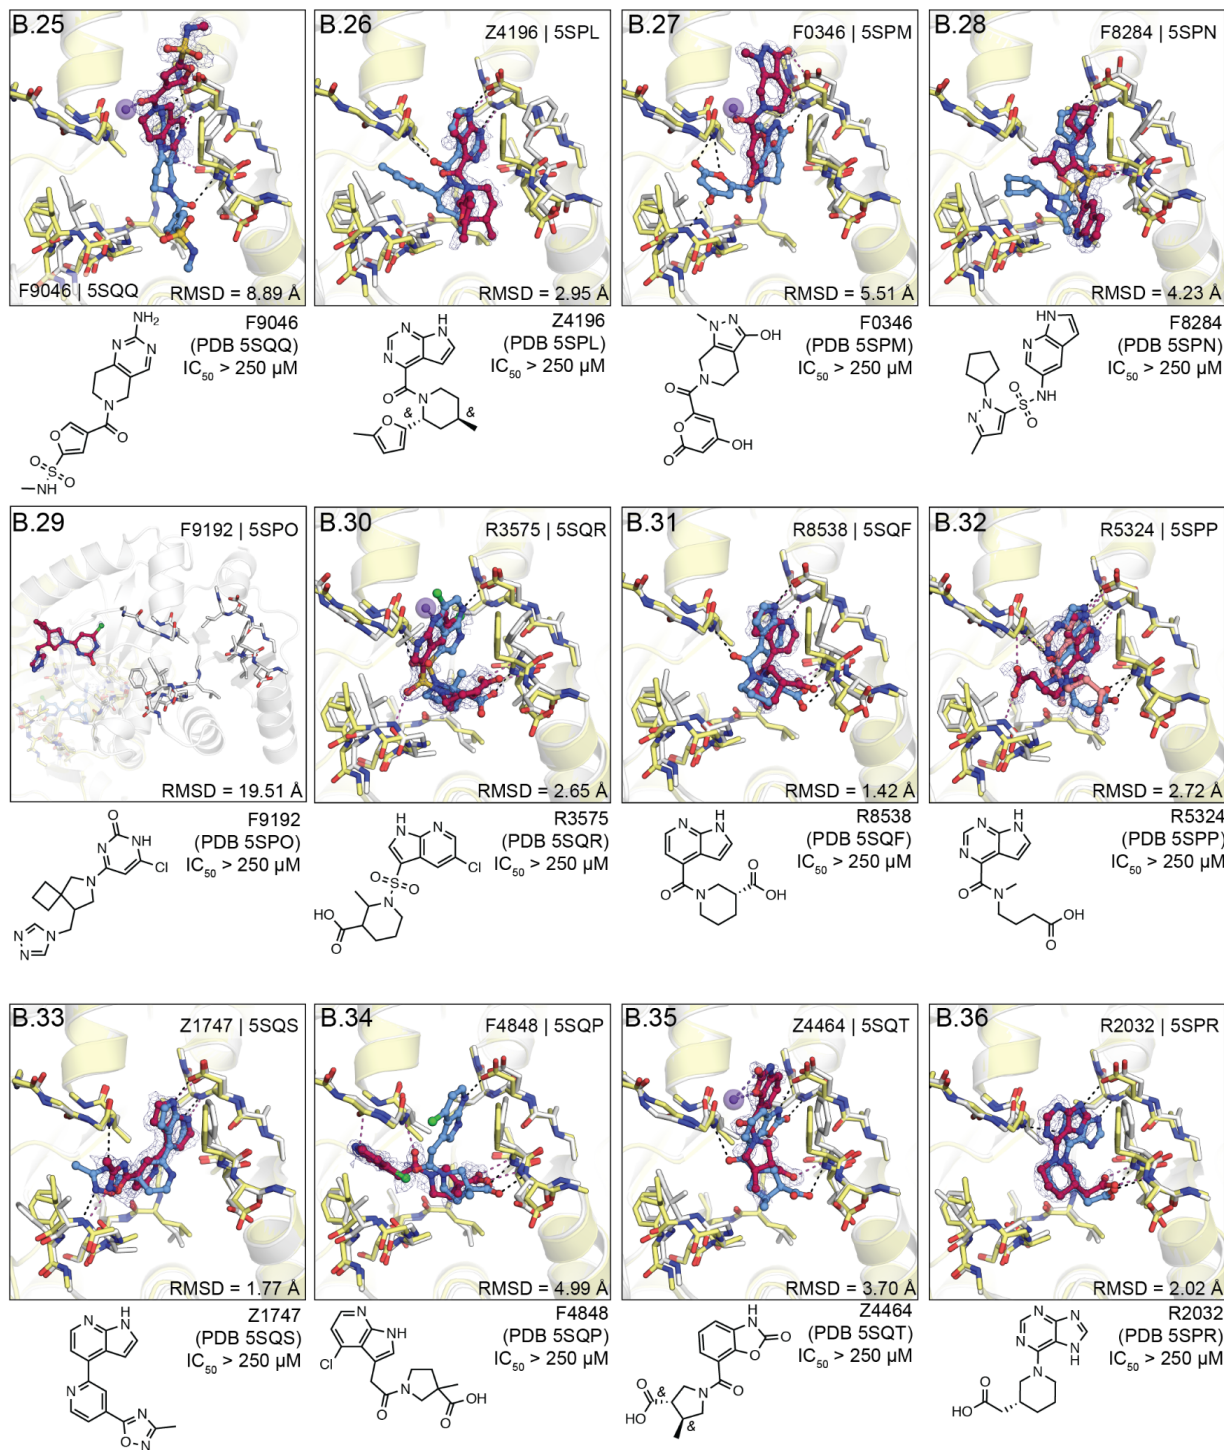

2<sup>nd</sup> Screen Docking Template

Docking Prediction

Crystal Structure

Solved Pose

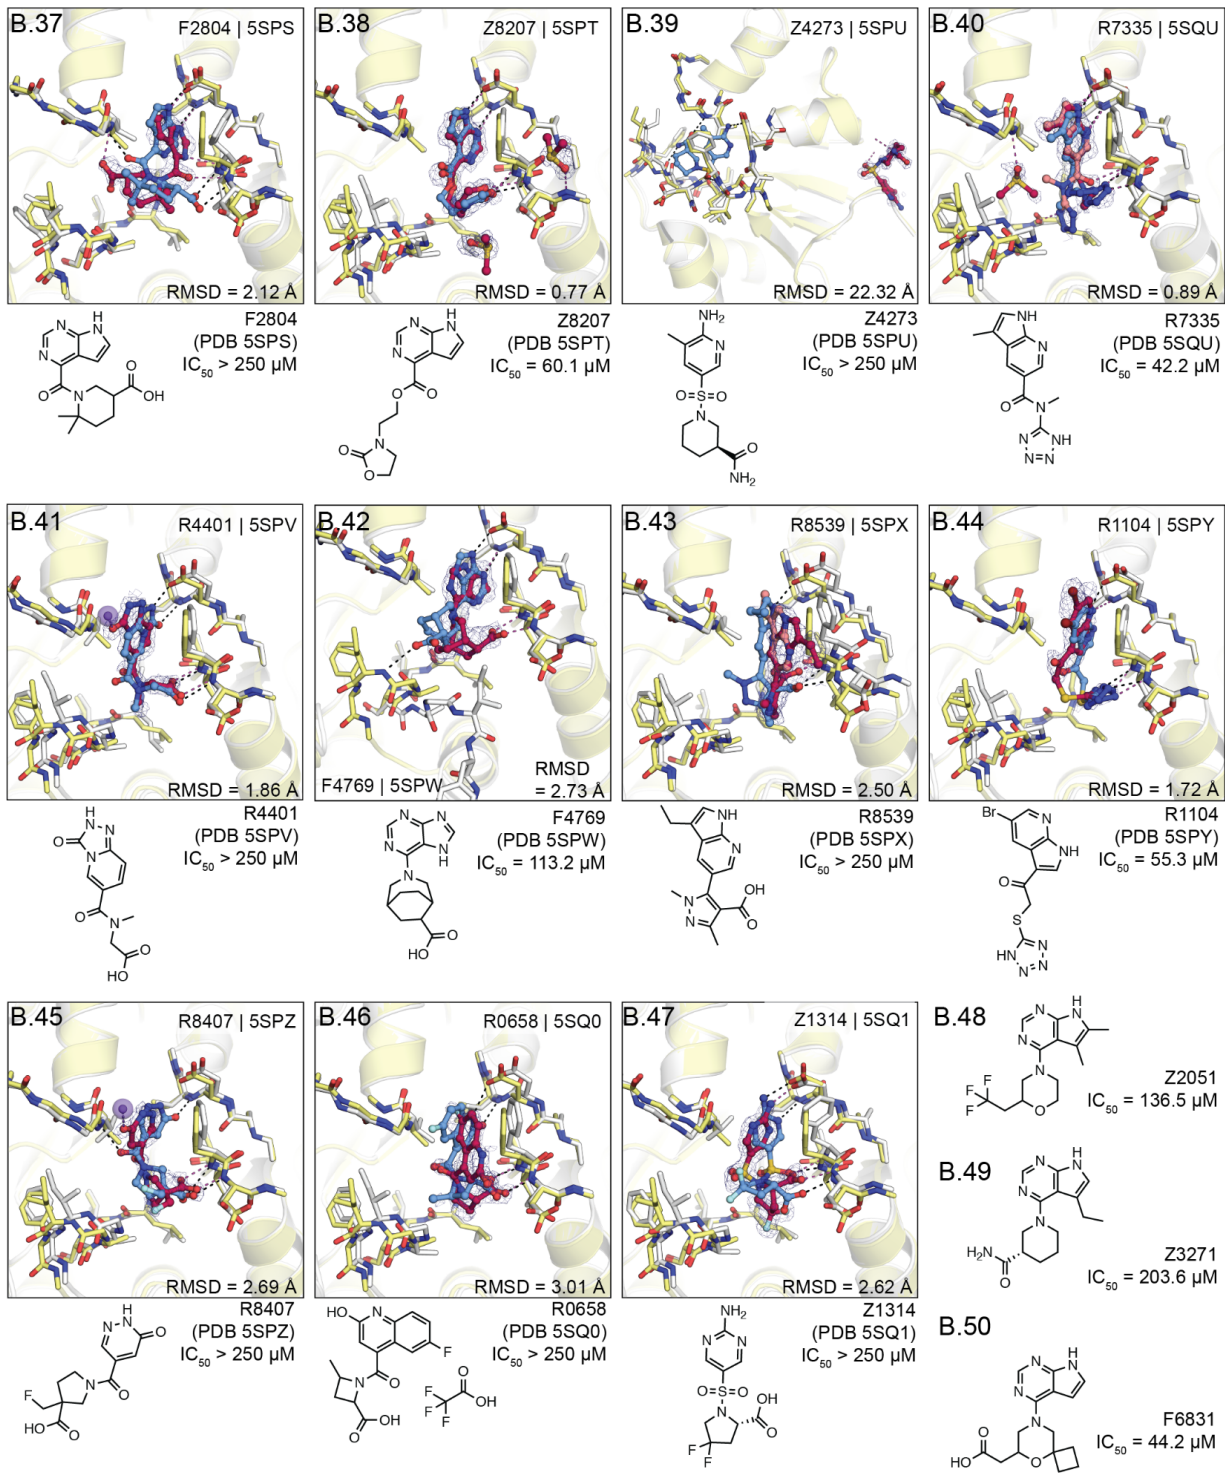

2<sup>nd</sup> Screen Docking Template

Docking Prediction

Crystal Structure

Solved Pose

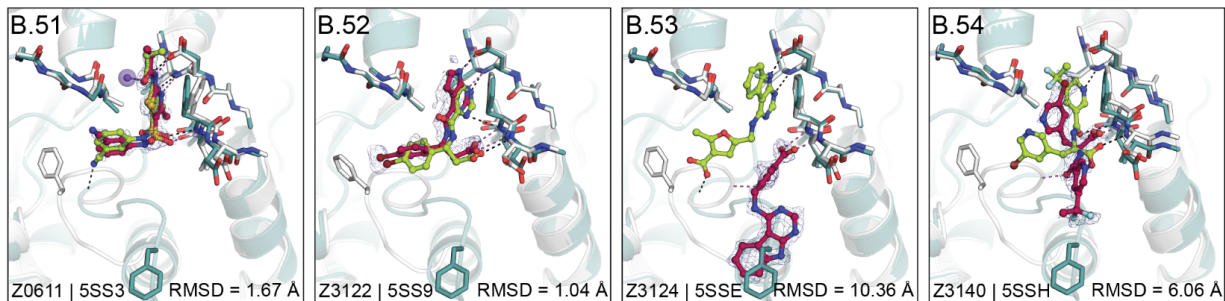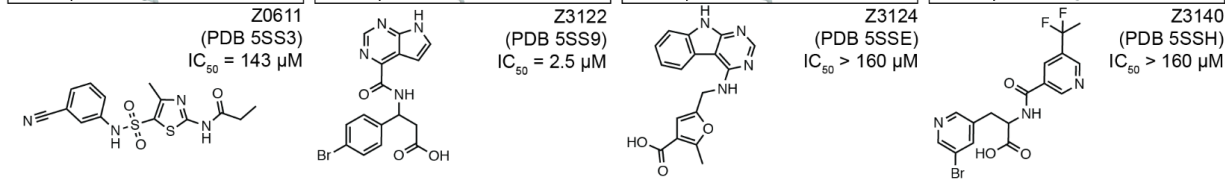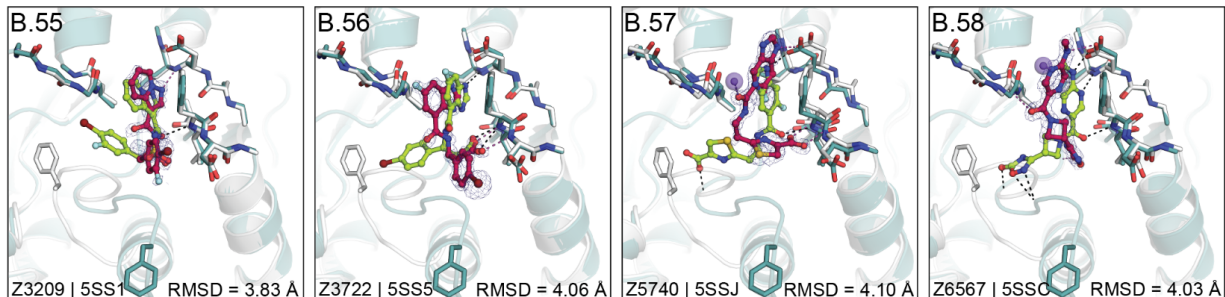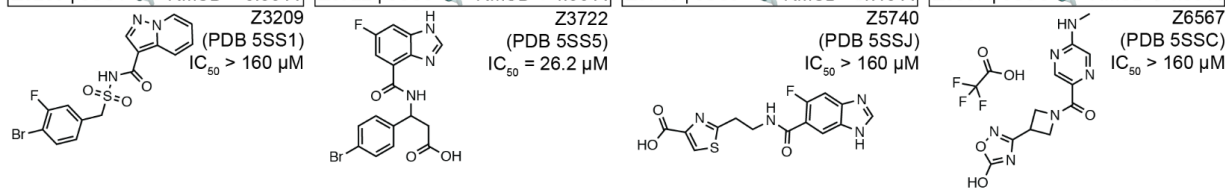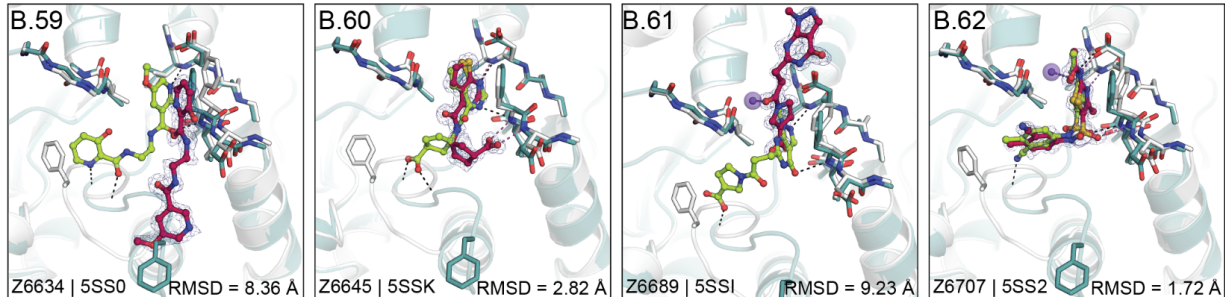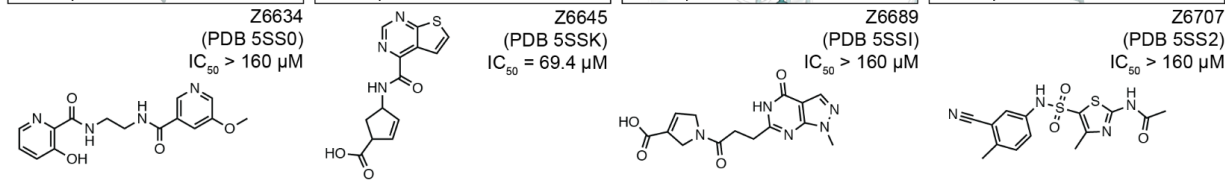

Docking Template (open state)
Docking Prediction
Crystal Structure
Solved Pose

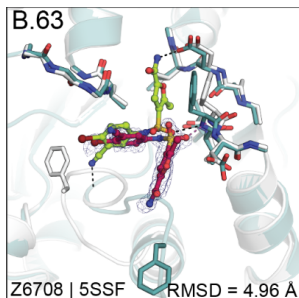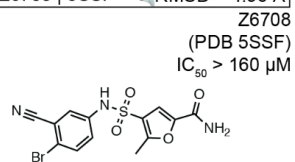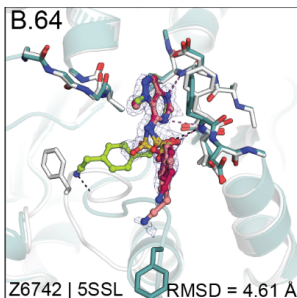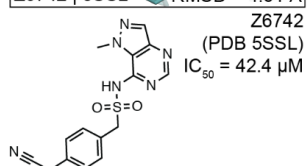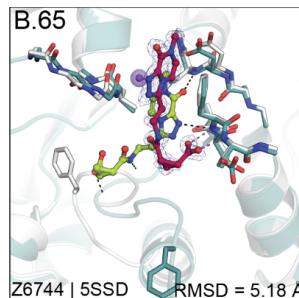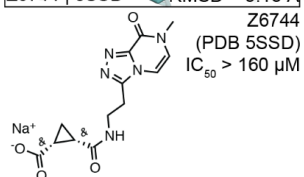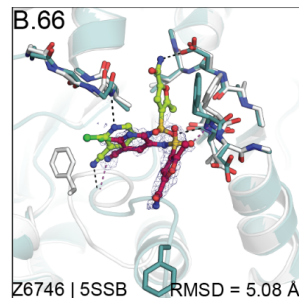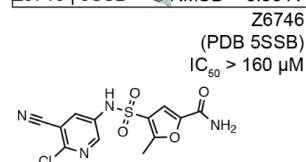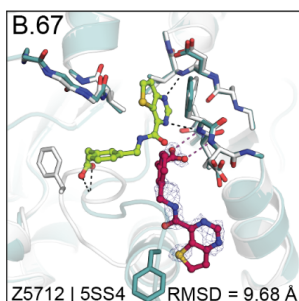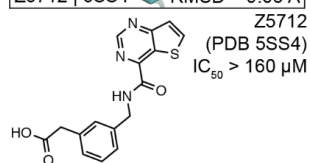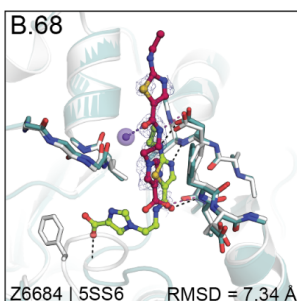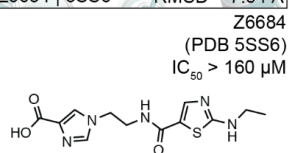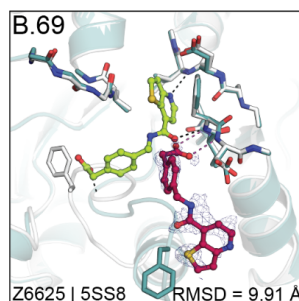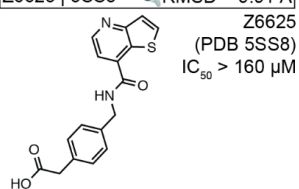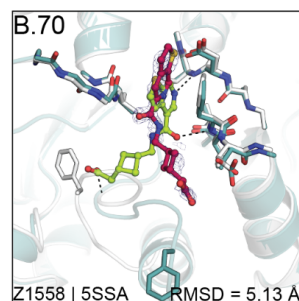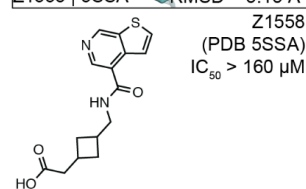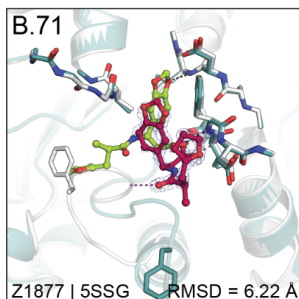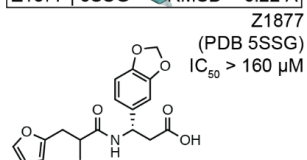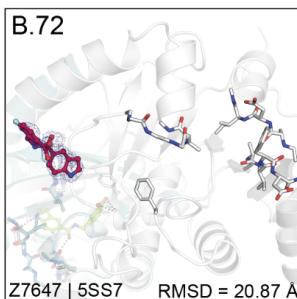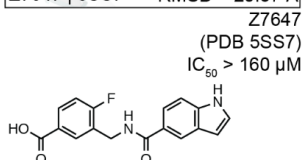

Docking Template (open state)

Docking Prediction

Crystal Structure

Solved Pose
